# Supplementary material
Source: publisher figshare collection journal article supplement (https://acs.figshare.com/ndownloader/files/9209584)
Supplement: Supplementary file 1 [file 9209584]

data_i16201
_audit_creation_date              2016-04-12
_audit_creation_method
;
Olex2 1.2
(compiled 2016.02.16 svn.r3265 for OlexSys, GUI svn.r5155)
;
_publ_contact_author_address      ?
_publ_contact_author_email        ?
_publ_contact_author_name         ''
_publ_contact_author_phone        ?
_publ_section_references
;
Dolomanov, O.V., Bourhis, L.J., Gildea, R.J, Howard, J.A.K. & Puschmann, H.
 (2009), J. Appl. Cryst. 42, 339-341.

Sheldrick, G.M. (2015). Acta Cryst. A71, 3-8.

Sheldrick, G.M. (2015). Acta Cryst. C71, 3-8.
;
_chemical_name_common             ?
_chemical_name_systematic         ?
_chemical_formula_moiety          'C44 H37 N2 P, C4 H8 O'
_chemical_formula_sum             'C48 H45 N2 O P'
_chemical_formula_weight          696.83
_chemical_melting_point           ?
loop_
  _atom_type_symbol
  _atom_type_description
  _atom_type_scat_dispersion_real
  _atom_type_scat_dispersion_imag
  _atom_type_scat_source
 'C' 'C' 0.0033 0.0016 'International Tables Vol C Tables 4.2.6.8 and 6.1.1.4'
 'H' 'H' 0.0000 0.0000 'International Tables Vol C Tables 4.2.6.8 and 6.1.1.4'
 'N' 'N' 0.0061 0.0033 'International Tables Vol C Tables 4.2.6.8 and 6.1.1.4'
 'O' 'O' 0.0106 0.0060 'International Tables Vol C Tables 4.2.6.8 and 6.1.1.4'
 'P' 'P' 0.1023 0.0942 'International Tables Vol C Tables 4.2.6.8 and 6.1.1.4'

_shelx_space_group_comment
;
The symmetry employed for this shelxl refinement is uniquely defined
by the following loop, which should always be used as a source of
symmetry information in preference to the above space-group names.
They are only intended as comments.
;
_space_group_crystal_system       'triclinic'
_space_group_IT_number            2
_space_group_name_H-M_alt         'P -1'
_space_group_name_Hall            '-P 1'
loop_
  _space_group_symop_operation_xyz
 'x, y, z'
 '-x, -y, -z'

_cell_length_a                    11.6039(4)
_cell_length_b                    12.8943(5)
_cell_length_c                    13.8287(8)
_cell_angle_alpha                 73.342(2)
_cell_angle_beta                  88.592(3)
_cell_angle_gamma                 72.775(2)
_cell_volume                      1889.25(15)
_cell_formula_units_Z             2
_cell_measurement_reflns_used     9782
_cell_measurement_temperature     100.15
_cell_measurement_theta_max       26.75
_cell_measurement_theta_min       2.32
_shelx_estimated_absorpt_T_max    0.989
_shelx_estimated_absorpt_T_min    0.936
_exptl_absorpt_coefficient_mu     0.112
_exptl_absorpt_correction_T_max   0.7455
_exptl_absorpt_correction_T_min   0.6143
_exptl_absorpt_correction_type    multi-scan
_exptl_absorpt_process_details
;
SADABS-2014/5 (Bruker,2014) was used for absorption correction.
wR2(int) was 0.1300 before and 0.0751 after correction.
The Ratio of minimum to maximum transmission is 0.8240.
The \l/2 correction factor is Not present.
;
_exptl_absorpt_special_details    ?
_exptl_crystal_colour             'clear red'
_exptl_crystal_colour_lustre      clear
_exptl_crystal_colour_primary     red
_exptl_crystal_density_diffrn     1.225
_exptl_crystal_density_meas       ?
_exptl_crystal_density_method     ?
_exptl_crystal_description        plate
_exptl_crystal_F_000              740
_exptl_crystal_preparation        ?
_exptl_crystal_recrystallization_method
'Dissolved in THF, then added hexanes and recrystallized at -15 oC.'
_exptl_crystal_size_max           0.6
_exptl_crystal_size_mid           0.4
_exptl_crystal_size_min           0.1
_exptl_transmission_factor_max    ?
_exptl_transmission_factor_min    ?
_diffrn_reflns_av_R_equivalents   0.0706
_diffrn_reflns_av_unetI/netI      0.0325
_diffrn_reflns_Laue_measured_fraction_full 1.000
_diffrn_reflns_Laue_measured_fraction_max 0.996
_diffrn_reflns_limit_h_max        14
_diffrn_reflns_limit_h_min        -14
_diffrn_reflns_limit_k_max        16
_diffrn_reflns_limit_k_min        -16
_diffrn_reflns_limit_l_max        17
_diffrn_reflns_limit_l_min        -17
_diffrn_reflns_number             102653
_diffrn_reflns_point_group_measured_fraction_full 1.000
_diffrn_reflns_point_group_measured_fraction_max 0.996
_diffrn_reflns_theta_full         26.000
_diffrn_reflns_theta_max          27.211
_diffrn_reflns_theta_min          1.540
_diffrn_ambient_temperature       100.15
_diffrn_detector_area_resol_mean  ?
_diffrn_measured_fraction_theta_full 1.000
_diffrn_measured_fraction_theta_max 0.996
_diffrn_measurement_device_type   'Bruker APEX-II CCD'
_diffrn_measurement_method        '\f and \w scans'
_diffrn_radiation_type            MoK\a
_diffrn_radiation_wavelength      0.71073
_diffrn_source                    ?
_diffrn_special_details           ?
_diffrn_standards_number          0
_reflns_Friedel_coverage          0.000
_reflns_Friedel_fraction_full     .
_reflns_Friedel_fraction_max      .
_reflns_number_gt                 6656
_reflns_number_total              8402
_reflns_special_details
;
 Reflections were merged by SHELXL according to the crystal
 class for the calculation of statistics and refinement.
 
 _reflns_Friedel_fraction is defined as the number of unique
 Friedel pairs measured divided by the number that would be
 possible theoretically, ignoring centric projections and
 systematic absences.
;
_reflns_threshold_expression      'I > 2\s(I)'
_computing_cell_refinement        ?
_computing_data_collection        ?
_computing_data_reduction         ?
_computing_molecular_graphics     'Olex2 (Dolomanov et al., 2009)'
_computing_publication_material   'Olex2 (Dolomanov et al., 2009)'
_computing_structure_refinement   'ShelXL (Sheldrick, 2015)'
_computing_structure_solution     'ShelXT (Sheldrick, 2015)'
_refine_diff_density_max          0.825
_refine_diff_density_min          -0.466
_refine_diff_density_rms          0.050
_refine_ls_extinction_coef        .
_refine_ls_extinction_method      none
_refine_ls_goodness_of_fit_ref    1.026
_refine_ls_hydrogen_treatment     constr
_refine_ls_matrix_type            full
_refine_ls_number_parameters      471
_refine_ls_number_reflns          8402
_refine_ls_number_restraints      0
_refine_ls_R_factor_all           0.0617
_refine_ls_R_factor_gt            0.0447
_refine_ls_restrained_S_all       1.026
_refine_ls_shift/su_max           0.001
_refine_ls_shift/su_mean          0.000
_refine_ls_structure_factor_coef  Fsqd
_refine_ls_weighting_details
'w=1/[\s^2^(Fo^2^)+(0.0443P)^2^+1.3602P] where P=(Fo^2^+2Fc^2^)/3'
_refine_ls_weighting_scheme       calc
_refine_ls_wR_factor_gt           0.1043
_refine_ls_wR_factor_ref          0.1168
_refine_special_details           ?
_olex2_refinement_description
;
1. Fixed Uiso
 At 1.2 times of:
  All C(H) groups, All C(H,H) groups
 At 1.5 times of:
  All C(H,H,H) groups
2.a Secondary CH2 refined with riding coordinates:
 C45(H45A,H45B), C46(H46A,H46B), C47(H47A,H47B), C48(H48A,H48B)
2.b Aromatic/amide H refined with riding coordinates:
 C5(H5), C6(H6), C7(H7), C8(H8), C11(H11), C12(H12), C13(H13), C14(H14),
 C15(H15), C16(H16), C17(H17), C21(H21), C22(H22), C23(H23), C24(H24), C25(H25),
  C27(H27), C28(H28), C29(H29), C30(H30), C31(H31), C33(H33), C34(H34),
 C35(H35), C36(H36), C37(H37), C39(H39), C40(H40), C41(H41), C42(H42), C43(H43)
2.c Idealised Me refined as rotating group:
 C3(H3A,H3B,H3C), C10(H10A,H10B,H10C)
;
_atom_sites_solution_hydrogens    geom
_atom_sites_solution_primary      direct
_atom_sites_solution_secondary    ?
loop_
  _atom_site_label
  _atom_site_type_symbol
  _atom_site_fract_x
  _atom_site_fract_y
  _atom_site_fract_z
  _atom_site_U_iso_or_equiv
  _atom_site_adp_type
  _atom_site_occupancy
  _atom_site_site_symmetry_order
  _atom_site_calc_flag
  _atom_site_refinement_flags_posn
  _atom_site_refinement_flags_adp
  _atom_site_refinement_flags_occupancy
  _atom_site_disorder_assembly
  _atom_site_disorder_group
 P1 P 0.74101(3) 0.64826(3) 0.59483(3) 0.01694(10) Uani 1 1 d . . . . .
 N1 N 0.61684(12) 0.59591(12) 0.80217(10) 0.0222(3) Uani 1 1 d . . . . .
 N2 N 0.61623(12) 0.77989(12) 0.76159(10) 0.0223(3) Uani 1 1 d . . . . .
 C1 C 0.59184(13) 0.70357(13) 0.61827(12) 0.0184(3) Uani 1 1 d . . . . .
 C2 C 0.56188(13) 0.70548(14) 0.72433(12) 0.0192(3) Uani 1 1 d . . . . .
 C3 C 0.57397(17) 0.50017(15) 0.80640(14) 0.0298(4) Uani 1 1 d . . . . .
 H3A H 0.5042 0.5040 0.8456 0.045 Uiso 1 1 calc GR . . . .
 H3B H 0.6366 0.4308 0.8373 0.045 Uiso 1 1 calc GR . . . .
 H3C H 0.5527 0.5022 0.7391 0.045 Uiso 1 1 calc GR . . . .
 C4 C 0.64001(14) 0.61919(16) 0.89078(12) 0.0259(4) Uani 1 1 d . . . . .
 C5 C 0.66507(16) 0.54907(19) 0.98896(14) 0.0364(5) Uani 1 1 d . . . . .
 H5 H 0.6668 0.4734 1.0053 0.044 Uiso 1 1 calc R . . . .
 C6 C 0.68786(19) 0.5967(2) 1.06299(15) 0.0490(6) Uani 1 1 d . . . . .
 H6 H 0.7067 0.5512 1.1296 0.059 Uiso 1 1 calc R . . . .
 C7 C 0.68301(19) 0.7088(2) 1.03937(16) 0.0487(6) Uani 1 1 d . . . . .
 H7 H 0.6973 0.7381 1.0904 0.058 Uiso 1 1 calc R . . . .
 C8 C 0.65700(17) 0.7797(2) 0.93995(15) 0.0377(5) Uani 1 1 d . . . . .
 H8 H 0.6531 0.8559 0.9240 0.045 Uiso 1 1 calc R . . . .
 C9 C 0.63727(14) 0.73276(16) 0.86618(13) 0.0264(4) Uani 1 1 d . . . . .
 C10 C 0.56467(17) 0.90151(15) 0.71933(15) 0.0314(4) Uani 1 1 d . . . . .
 H10A H 0.5474 0.9196 0.6478 0.047 Uiso 1 1 calc GR . . . .
 H10B H 0.6212 0.9386 0.7312 0.047 Uiso 1 1 calc GR . . . .
 H10C H 0.4913 0.9270 0.7509 0.047 Uiso 1 1 calc GR . . . .
 C11 C 0.50193(14) 0.75412(13) 0.53544(12) 0.0196(3) Uani 1 1 d . . . . .
 H11 H 0.4227 0.7767 0.5535 0.023 Uiso 1 1 calc R . . . .
 C12 C 0.51504(14) 0.77394(14) 0.43461(12) 0.0210(3) Uani 1 1 d . . . . .
 H12 H 0.5928 0.7677 0.4134 0.025 Uiso 1 1 calc R . . . .
 C13 C 0.29527(15) 0.84308(15) 0.37021(13) 0.0257(4) Uani 1 1 d . . . . .
 H13 H 0.2708 0.8546 0.4319 0.031 Uiso 1 1 calc R . . . .
 C14 C 0.20892(16) 0.86472(17) 0.29376(14) 0.0323(4) Uani 1 1 d . . . . .
 H14 H 0.1274 0.8900 0.3052 0.039 Uiso 1 1 calc R . . . .
 C15 C 0.24133(17) 0.84954(18) 0.20120(14) 0.0359(5) Uani 1 1 d . . . . .
 H15 H 0.1826 0.8634 0.1506 0.043 Uiso 1 1 calc R . . . .
 C16 C 0.36326(18) 0.81322(19) 0.18480(14) 0.0378(5) Uani 1 1 d . . . . .
 H16 H 0.3868 0.8033 0.1225 0.045 Uiso 1 1 calc R . . . .
 C17 C 0.45000(16) 0.79168(16) 0.26085(13) 0.0296(4) Uani 1 1 d . . . . .
 H17 H 0.5313 0.7683 0.2482 0.035 Uiso 1 1 calc R . . . .
 C18 C 0.41908(14) 0.80408(13) 0.35613(12) 0.0201(3) Uani 1 1 d . . . . .
 C19 C 0.42820(14) 0.73956(14) 0.73583(12) 0.0210(3) Uani 1 1 d . . . . .
 C20 C 0.32674(14) 0.75814(14) 0.76206(12) 0.0210(3) Uani 1 1 d . . . . .
 C21 C 0.17601(15) 0.78727(15) 0.88814(13) 0.0253(4) Uani 1 1 d . . . . .
 H21 H 0.2380 0.7687 0.9372 0.030 Uiso 1 1 calc R . . . .
 C22 C 0.05636(16) 0.81783(16) 0.91282(14) 0.0291(4) Uani 1 1 d . . . . .
 H22 H 0.0383 0.8201 0.9782 0.035 Uiso 1 1 calc R . . . .
 C23 C -0.03613(15) 0.84487(15) 0.83983(14) 0.0286(4) Uani 1 1 d . . . . .
 H23 H -0.1163 0.8655 0.8563 0.034 Uiso 1 1 calc R . . . .
 C24 C -0.00956(15) 0.84133(14) 0.74269(14) 0.0252(4) Uani 1 1 d . . . . .
 H24 H -0.0719 0.8598 0.6939 0.030 Uiso 1 1 calc R . . . .
 C25 C 0.10916(14) 0.81053(14) 0.71768(13) 0.0219(3) Uani 1 1 d . . . . .
 H25 H 0.1265 0.8072 0.6524 0.026 Uiso 1 1 calc R . . . .
 C26 C 0.20345(14) 0.78440(13) 0.79009(12) 0.0203(3) Uani 1 1 d . . . . .
 C27 C 0.67449(15) 0.49703(14) 0.51847(13) 0.0231(3) Uani 1 1 d . . . . .
 H27 H 0.6291 0.4877 0.5750 0.028 Uiso 1 1 calc R . . . .
 C28 C 0.66932(15) 0.44025(15) 0.44834(13) 0.0264(4) Uani 1 1 d . . . . .
 H28 H 0.6210 0.3925 0.4582 0.032 Uiso 1 1 calc R . . . .
 C29 C 0.73573(15) 0.45414(15) 0.36372(13) 0.0258(4) Uani 1 1 d . . . . .
 H29 H 0.7312 0.4165 0.3164 0.031 Uiso 1 1 calc R . . . .
 C30 C 0.80914(15) 0.52424(15) 0.34936(13) 0.0244(4) Uani 1 1 d . . . . .
 H30 H 0.8542 0.5333 0.2927 0.029 Uiso 1 1 calc R . . . .
 C31 C 0.81524(14) 0.58087(14) 0.41974(12) 0.0213(3) Uani 1 1 d . . . . .
 H31 H 0.8648 0.6275 0.4102 0.026 Uiso 1 1 calc R . . . .
 C32 C 0.74740(13) 0.56819(13) 0.50483(12) 0.0188(3) Uani 1 1 d . . . . .
 C33 C 0.86717(15) 0.43833(14) 0.72954(12) 0.0233(3) Uani 1 1 d . . . . .
 H33 H 0.8358 0.4055 0.6889 0.028 Uiso 1 1 calc R . . . .
 C34 C 0.94171(16) 0.37015(15) 0.81546(13) 0.0287(4) Uani 1 1 d . . . . .
 H34 H 0.9586 0.2917 0.8331 0.034 Uiso 1 1 calc R . . . .
 C35 C 0.99088(15) 0.41857(16) 0.87493(13) 0.0282(4) Uani 1 1 d . . . . .
 H35 H 1.0413 0.3725 0.9320 0.034 Uiso 1 1 calc R . . . .
 C36 C 0.96512(14) 0.53519(15) 0.84960(13) 0.0253(4) Uani 1 1 d . . . . .
 H36 H 0.9987 0.5675 0.8893 0.030 Uiso 1 1 calc R . . . .
 C37 C 0.88945(14) 0.60402(14) 0.76514(12) 0.0215(3) Uani 1 1 d . . . . .
 H37 H 0.8717 0.6825 0.7487 0.026 Uiso 1 1 calc R . . . .
 C38 C 0.83965(13) 0.55600(14) 0.70462(12) 0.0195(3) Uani 1 1 d . . . . .
 C39 C 0.94187(14) 0.72060(14) 0.52983(12) 0.0213(3) Uani 1 1 d . . . . .
 H39 H 0.9867 0.6444 0.5535 0.026 Uiso 1 1 calc R . . . .
 C40 C 0.99893(15) 0.80170(15) 0.48619(12) 0.0245(4) Uani 1 1 d . . . . .
 H40 H 1.0820 0.7797 0.4800 0.029 Uiso 1 1 calc R . . . .
 C41 C 0.93251(16) 0.91499(15) 0.45191(13) 0.0265(4) Uani 1 1 d . . . . .
 H41 H 0.9712 0.9691 0.4231 0.032 Uiso 1 1 calc R . . . .
 C42 C 0.80841(16) 0.94863(15) 0.46010(13) 0.0257(4) Uani 1 1 d . . . . .
 H42 H 0.7641 1.0250 0.4368 0.031 Uiso 1 1 calc R . . . .
 C43 C 0.75051(15) 0.86757(14) 0.50342(12) 0.0215(3) Uani 1 1 d . . . . .
 H43 H 0.6673 0.8898 0.5090 0.026 Uiso 1 1 calc R . . . .
 C44 C 0.81669(14) 0.75370(14) 0.53816(11) 0.0186(3) Uani 1 1 d . . . . .
 O1 O 1.08657(13) 0.09641(13) 0.87999(10) 0.0436(4) Uani 1 1 d . . . . .
 C45 C 1.11945(19) 0.10252(18) 0.77937(15) 0.0366(4) Uani 1 1 d . . . . .
 H45A H 1.0659 0.1694 0.7318 0.044 Uiso 1 1 calc R . . . .
 H45B H 1.1154 0.0358 0.7621 0.044 Uiso 1 1 calc R . . . .
 C46 C 1.2468(2) 0.1087(2) 0.77710(16) 0.0479(6) Uani 1 1 d . . . . .
 H46A H 1.2485 0.1857 0.7674 0.057 Uiso 1 1 calc R . . . .
 H46B H 1.2891 0.0803 0.7241 0.057 Uiso 1 1 calc R . . . .
 C47 C 1.30107(19) 0.0315(2) 0.88218(16) 0.0441(5) Uani 1 1 d . . . . .
 H47A H 1.3325 -0.0472 0.8827 0.053 Uiso 1 1 calc R . . . .
 H47B H 1.3650 0.0546 0.9056 0.053 Uiso 1 1 calc R . . . .
 C48 C 1.19263(19) 0.0498(2) 0.94552(16) 0.0472(6) Uani 1 1 d . . . . .
 H48A H 1.1919 -0.0218 0.9929 0.057 Uiso 1 1 calc R . . . .
 H48B H 1.1967 0.1013 0.9837 0.057 Uiso 1 1 calc R . . . .

loop_
  _atom_site_aniso_label
  _atom_site_aniso_U_11
  _atom_site_aniso_U_22
  _atom_site_aniso_U_33
  _atom_site_aniso_U_23
  _atom_site_aniso_U_13
  _atom_site_aniso_U_12
 P1 0.01399(18) 0.0214(2) 0.0175(2) -0.00647(15) 0.00237(14) -0.00780(15)
 N1 0.0198(7) 0.0271(7) 0.0194(7) -0.0059(6) 0.0044(5) -0.0078(6)
 N2 0.0185(6) 0.0294(8) 0.0247(7) -0.0133(6) 0.0035(5) -0.0106(6)
 C1 0.0154(7) 0.0239(8) 0.0188(8) -0.0079(6) 0.0026(6) -0.0086(6)
 C2 0.0154(7) 0.0231(8) 0.0213(8) -0.0084(6) 0.0032(6) -0.0073(6)
 C3 0.0320(9) 0.0291(9) 0.0294(9) -0.0067(7) 0.0105(7) -0.0133(8)
 C4 0.0142(7) 0.0434(10) 0.0199(8) -0.0094(7) 0.0043(6) -0.0088(7)
 C5 0.0239(9) 0.0579(13) 0.0226(9) -0.0040(9) 0.0035(7) -0.0128(9)
 C6 0.0326(11) 0.095(2) 0.0199(9) -0.0103(11) 0.0012(8) -0.0267(12)
 C7 0.0378(11) 0.097(2) 0.0285(11) -0.0296(12) 0.0068(9) -0.0354(12)
 C8 0.0288(10) 0.0656(14) 0.0341(10) -0.0279(10) 0.0087(8) -0.0246(10)
 C9 0.0156(7) 0.0455(11) 0.0235(8) -0.0153(8) 0.0056(6) -0.0126(7)
 C10 0.0325(10) 0.0294(9) 0.0393(11) -0.0178(8) 0.0093(8) -0.0127(8)
 C11 0.0143(7) 0.0226(8) 0.0248(8) -0.0093(6) 0.0036(6) -0.0079(6)
 C12 0.0146(7) 0.0252(8) 0.0233(8) -0.0061(7) 0.0026(6) -0.0073(6)
 C13 0.0197(8) 0.0314(9) 0.0237(9) -0.0043(7) 0.0018(6) -0.0078(7)
 C14 0.0192(8) 0.0409(11) 0.0302(10) 0.0016(8) -0.0025(7) -0.0107(8)
 C15 0.0292(10) 0.0491(12) 0.0257(9) 0.0016(8) -0.0094(7) -0.0176(9)
 C16 0.0374(11) 0.0549(13) 0.0218(9) -0.0100(9) -0.0010(8) -0.0156(9)
 C17 0.0229(8) 0.0384(10) 0.0249(9) -0.0077(8) 0.0013(7) -0.0070(7)
 C18 0.0190(8) 0.0203(8) 0.0207(8) -0.0042(6) 0.0005(6) -0.0071(6)
 C19 0.0195(8) 0.0268(8) 0.0196(8) -0.0088(7) 0.0025(6) -0.0096(6)
 C20 0.0198(8) 0.0252(8) 0.0203(8) -0.0088(6) 0.0023(6) -0.0081(6)
 C21 0.0217(8) 0.0311(9) 0.0227(8) -0.0071(7) 0.0022(6) -0.0082(7)
 C22 0.0266(9) 0.0354(10) 0.0249(9) -0.0093(7) 0.0095(7) -0.0088(8)
 C23 0.0166(8) 0.0313(9) 0.0371(10) -0.0084(8) 0.0087(7) -0.0084(7)
 C24 0.0184(8) 0.0260(9) 0.0325(9) -0.0087(7) 0.0012(7) -0.0086(7)
 C25 0.0206(8) 0.0243(8) 0.0236(8) -0.0091(7) 0.0035(6) -0.0091(6)
 C26 0.0175(7) 0.0200(8) 0.0248(8) -0.0077(6) 0.0047(6) -0.0069(6)
 C27 0.0217(8) 0.0258(8) 0.0246(8) -0.0083(7) 0.0055(6) -0.0105(7)
 C28 0.0254(8) 0.0263(9) 0.0317(9) -0.0112(7) 0.0002(7) -0.0113(7)
 C29 0.0269(9) 0.0267(9) 0.0252(9) -0.0130(7) -0.0025(7) -0.0044(7)
 C30 0.0206(8) 0.0303(9) 0.0216(8) -0.0105(7) 0.0038(6) -0.0040(7)
 C31 0.0167(7) 0.0255(8) 0.0222(8) -0.0068(7) 0.0021(6) -0.0074(6)
 C32 0.0154(7) 0.0213(8) 0.0201(8) -0.0070(6) 0.0001(6) -0.0051(6)
 C33 0.0217(8) 0.0263(9) 0.0224(8) -0.0079(7) 0.0042(6) -0.0073(7)
 C34 0.0281(9) 0.0250(9) 0.0275(9) -0.0041(7) 0.0045(7) -0.0035(7)
 C35 0.0210(8) 0.0368(10) 0.0196(8) -0.0034(7) 0.0010(6) -0.0025(7)
 C36 0.0178(8) 0.0381(10) 0.0215(8) -0.0101(7) 0.0022(6) -0.0090(7)
 C37 0.0163(7) 0.0257(8) 0.0233(8) -0.0072(7) 0.0037(6) -0.0077(6)
 C38 0.0150(7) 0.0257(8) 0.0185(8) -0.0073(6) 0.0040(6) -0.0066(6)
 C39 0.0181(7) 0.0266(8) 0.0197(8) -0.0058(6) -0.0005(6) -0.0081(6)
 C40 0.0190(8) 0.0380(10) 0.0205(8) -0.0081(7) 0.0013(6) -0.0149(7)
 C41 0.0315(9) 0.0341(10) 0.0212(8) -0.0068(7) 0.0032(7) -0.0221(8)
 C42 0.0314(9) 0.0239(8) 0.0240(9) -0.0068(7) 0.0014(7) -0.0117(7)
 C43 0.0204(8) 0.0262(8) 0.0204(8) -0.0082(7) 0.0015(6) -0.0093(6)
 C44 0.0180(7) 0.0248(8) 0.0163(7) -0.0074(6) 0.0012(6) -0.0101(6)
 O1 0.0384(8) 0.0491(9) 0.0304(7) -0.0096(6) 0.0018(6) 0.0039(7)
 C45 0.0420(11) 0.0355(11) 0.0293(10) -0.0116(8) 0.0012(8) -0.0053(9)
 C46 0.0518(13) 0.0748(17) 0.0270(10) -0.0171(11) 0.0080(9) -0.0318(12)
 C47 0.0382(11) 0.0572(14) 0.0377(12) -0.0175(10) 0.0036(9) -0.0122(10)
 C48 0.0385(11) 0.0756(17) 0.0267(10) -0.0134(10) 0.0022(9) -0.0176(11)

_geom_special_details
;
 All esds (except the esd in the dihedral angle between two l.s. planes)
 are estimated using the full covariance matrix.  The cell esds are taken
 into account individually in the estimation of esds in distances, angles
 and torsion angles; correlations between esds in cell parameters are only
 used when they are defined by crystal symmetry.  An approximate (isotropic)
 treatment of cell esds is used for estimating esds involving l.s. planes.
;
loop_
  _geom_bond_atom_site_label_1
  _geom_bond_atom_site_label_2
  _geom_bond_distance
  _geom_bond_site_symmetry_2
  _geom_bond_publ_flag
 P1 C1 1.7273(15) . ?
 P1 C32 1.8187(16) . ?
 P1 C38 1.8094(16) . ?
 P1 C44 1.8156(16) . ?
 N1 C2 1.480(2) . ?
 N1 C3 1.448(2) . ?
 N1 C4 1.392(2) . ?
 N2 C2 1.497(2) . ?
 N2 C9 1.395(2) . ?
 N2 C10 1.447(2) . ?
 C1 C2 1.504(2) . ?
 C1 C11 1.433(2) . ?
 C2 C19 1.500(2) . ?
 C3 H3A 0.9600 . ?
 C3 H3B 0.9600 . ?
 C3 H3C 0.9600 . ?
 C4 C5 1.380(3) . ?
 C4 C9 1.396(3) . ?
 C5 H5 0.9300 . ?
 C5 C6 1.402(3) . ?
 C6 H6 0.9300 . ?
 C6 C7 1.371(4) . ?
 C7 H7 0.9300 . ?
 C7 C8 1.398(3) . ?
 C8 H8 0.9300 . ?
 C8 C9 1.381(2) . ?
 C10 H10A 0.9600 . ?
 C10 H10B 0.9600 . ?
 C10 H10C 0.9600 . ?
 C11 H11 0.9300 . ?
 C11 C12 1.357(2) . ?
 C12 H12 0.9300 . ?
 C12 C18 1.459(2) . ?
 C13 H13 0.9300 . ?
 C13 C14 1.385(2) . ?
 C13 C18 1.403(2) . ?
 C14 H14 0.9300 . ?
 C14 C15 1.376(3) . ?
 C15 H15 0.9300 . ?
 C15 C16 1.388(3) . ?
 C16 H16 0.9300 . ?
 C16 C17 1.384(3) . ?
 C17 H17 0.9300 . ?
 C17 C18 1.398(2) . ?
 C19 C20 1.199(2) . ?
 C20 C26 1.440(2) . ?
 C21 H21 0.9300 . ?
 C21 C22 1.389(2) . ?
 C21 C26 1.394(2) . ?
 C22 H22 0.9300 . ?
 C22 C23 1.386(3) . ?
 C23 H23 0.9300 . ?
 C23 C24 1.381(3) . ?
 C24 H24 0.9300 . ?
 C24 C25 1.381(2) . ?
 C25 H25 0.9300 . ?
 C25 C26 1.398(2) . ?
 C27 H27 0.9300 . ?
 C27 C28 1.384(2) . ?
 C27 C32 1.395(2) . ?
 C28 H28 0.9300 . ?
 C28 C29 1.383(2) . ?
 C29 H29 0.9300 . ?
 C29 C30 1.388(2) . ?
 C30 H30 0.9300 . ?
 C30 C31 1.388(2) . ?
 C31 H31 0.9300 . ?
 C31 C32 1.397(2) . ?
 C33 H33 0.9300 . ?
 C33 C34 1.391(2) . ?
 C33 C38 1.393(2) . ?
 C34 H34 0.9300 . ?
 C34 C35 1.386(3) . ?
 C35 H35 0.9300 . ?
 C35 C36 1.382(3) . ?
 C36 H36 0.9300 . ?
 C36 C37 1.385(2) . ?
 C37 H37 0.9300 . ?
 C37 C38 1.397(2) . ?
 C39 H39 0.9300 . ?
 C39 C40 1.387(2) . ?
 C39 C44 1.399(2) . ?
 C40 H40 0.9300 . ?
 C40 C41 1.381(3) . ?
 C41 H41 0.9300 . ?
 C41 C42 1.387(2) . ?
 C42 H42 0.9300 . ?
 C42 C43 1.393(2) . ?
 C43 H43 0.9300 . ?
 C43 C44 1.386(2) . ?
 O1 C45 1.420(2) . ?
 O1 C48 1.415(2) . ?
 C45 H45A 0.9700 . ?
 C45 H45B 0.9700 . ?
 C45 C46 1.502(3) . ?
 C46 H46A 0.9700 . ?
 C46 H46B 0.9700 . ?
 C46 C47 1.531(3) . ?
 C47 H47A 0.9700 . ?
 C47 H47B 0.9700 . ?
 C47 C48 1.515(3) . ?
 C48 H48A 0.9700 . ?
 C48 H48B 0.9700 . ?

loop_
  _geom_angle_atom_site_label_1
  _geom_angle_atom_site_label_2
  _geom_angle_atom_site_label_3
  _geom_angle
  _geom_angle_site_symmetry_1
  _geom_angle_site_symmetry_3
  _geom_angle_publ_flag
 C1 P1 C32 108.95(7) . . ?
 C1 P1 C38 115.43(7) . . ?
 C1 P1 C44 114.68(7) . . ?
 C38 P1 C32 107.87(7) . . ?
 C38 P1 C44 103.75(7) . . ?
 C44 P1 C32 105.51(7) . . ?
 C3 N1 C2 119.29(13) . . ?
 C4 N1 C2 107.90(13) . . ?
 C4 N1 C3 120.34(14) . . ?
 C9 N2 C2 106.85(13) . . ?
 C9 N2 C10 119.56(14) . . ?
 C10 N2 C2 117.58(13) . . ?
 C2 C1 P1 118.64(11) . . ?
 C11 C1 P1 119.32(12) . . ?
 C11 C1 C2 121.86(13) . . ?
 N1 C2 N2 99.59(12) . . ?
 N1 C2 C1 113.84(13) . . ?
 N1 C2 C19 107.69(13) . . ?
 N2 C2 C1 113.31(12) . . ?
 N2 C2 C19 109.30(12) . . ?
 C19 C2 C1 112.28(13) . . ?
 N1 C3 H3A 109.5 . . ?
 N1 C3 H3B 109.5 . . ?
 N1 C3 H3C 109.5 . . ?
 H3A C3 H3B 109.5 . . ?
 H3A C3 H3C 109.5 . . ?
 H3B C3 H3C 109.5 . . ?
 N1 C4 C9 108.29(15) . . ?
 C5 C4 N1 130.23(18) . . ?
 C5 C4 C9 121.46(17) . . ?
 C4 C5 H5 121.4 . . ?
 C4 C5 C6 117.2(2) . . ?
 C6 C5 H5 121.4 . . ?
 C5 C6 H6 119.3 . . ?
 C7 C6 C5 121.5(2) . . ?
 C7 C6 H6 119.3 . . ?
 C6 C7 H7 119.4 . . ?
 C6 C7 C8 121.21(19) . . ?
 C8 C7 H7 119.4 . . ?
 C7 C8 H8 121.2 . . ?
 C9 C8 C7 117.6(2) . . ?
 C9 C8 H8 121.2 . . ?
 N2 C9 C4 108.40(14) . . ?
 C8 C9 N2 130.58(18) . . ?
 C8 C9 C4 120.99(18) . . ?
 N2 C10 H10A 109.5 . . ?
 N2 C10 H10B 109.5 . . ?
 N2 C10 H10C 109.5 . . ?
 H10A C10 H10B 109.5 . . ?
 H10A C10 H10C 109.5 . . ?
 H10B C10 H10C 109.5 . . ?
 C1 C11 H11 115.1 . . ?
 C12 C11 C1 129.72(14) . . ?
 C12 C11 H11 115.1 . . ?
 C11 C12 H12 116.8 . . ?
 C11 C12 C18 126.42(14) . . ?
 C18 C12 H12 116.8 . . ?
 C14 C13 H13 119.5 . . ?
 C14 C13 C18 121.04(16) . . ?
 C18 C13 H13 119.5 . . ?
 C13 C14 H14 119.4 . . ?
 C15 C14 C13 121.28(17) . . ?
 C15 C14 H14 119.4 . . ?
 C14 C15 H15 120.6 . . ?
 C14 C15 C16 118.72(17) . . ?
 C16 C15 H15 120.6 . . ?
 C15 C16 H16 119.9 . . ?
 C17 C16 C15 120.26(18) . . ?
 C17 C16 H16 119.9 . . ?
 C16 C17 H17 119.0 . . ?
 C16 C17 C18 121.96(17) . . ?
 C18 C17 H17 119.0 . . ?
 C13 C18 C12 124.19(15) . . ?
 C17 C18 C12 119.09(14) . . ?
 C17 C18 C13 116.70(15) . . ?
 C20 C19 C2 168.94(17) . . ?
 C19 C20 C26 177.72(19) . . ?
 C22 C21 H21 119.9 . . ?
 C22 C21 C26 120.24(16) . . ?
 C26 C21 H21 119.9 . . ?
 C21 C22 H22 120.0 . . ?
 C23 C22 C21 119.90(16) . . ?
 C23 C22 H22 120.0 . . ?
 C22 C23 H23 119.9 . . ?
 C24 C23 C22 120.16(15) . . ?
 C24 C23 H23 119.9 . . ?
 C23 C24 H24 119.9 . . ?
 C25 C24 C23 120.29(16) . . ?
 C25 C24 H24 119.9 . . ?
 C24 C25 H25 119.9 . . ?
 C24 C25 C26 120.25(15) . . ?
 C26 C25 H25 119.9 . . ?
 C21 C26 C20 120.93(15) . . ?
 C21 C26 C25 119.14(15) . . ?
 C25 C26 C20 119.91(14) . . ?
 C28 C27 H27 119.8 . . ?
 C28 C27 C32 120.31(15) . . ?
 C32 C27 H27 119.8 . . ?
 C27 C28 H28 119.8 . . ?
 C29 C28 C27 120.33(16) . . ?
 C29 C28 H28 119.8 . . ?
 C28 C29 H29 120.0 . . ?
 C28 C29 C30 120.02(15) . . ?
 C30 C29 H29 120.0 . . ?
 C29 C30 H30 120.0 . . ?
 C29 C30 C31 119.91(15) . . ?
 C31 C30 H30 120.0 . . ?
 C30 C31 H31 119.8 . . ?
 C30 C31 C32 120.37(15) . . ?
 C32 C31 H31 119.8 . . ?
 C27 C32 P1 117.87(12) . . ?
 C27 C32 C31 119.06(15) . . ?
 C31 C32 P1 122.92(12) . . ?
 C34 C33 H33 120.1 . . ?
 C34 C33 C38 119.73(16) . . ?
 C38 C33 H33 120.1 . . ?
 C33 C34 H34 119.8 . . ?
 C35 C34 C33 120.31(17) . . ?
 C35 C34 H34 119.8 . . ?
 C34 C35 H35 120.0 . . ?
 C36 C35 C34 120.08(16) . . ?
 C36 C35 H35 120.0 . . ?
 C35 C36 H36 119.9 . . ?
 C35 C36 C37 120.12(16) . . ?
 C37 C36 H36 119.9 . . ?
 C36 C37 H37 119.9 . . ?
 C36 C37 C38 120.22(16) . . ?
 C38 C37 H37 119.9 . . ?
 C33 C38 P1 121.33(12) . . ?
 C33 C38 C37 119.53(15) . . ?
 C37 C38 P1 119.15(12) . . ?
 C40 C39 H39 120.1 . . ?
 C40 C39 C44 119.87(16) . . ?
 C44 C39 H39 120.1 . . ?
 C39 C40 H40 120.0 . . ?
 C41 C40 C39 120.07(15) . . ?
 C41 C40 H40 120.0 . . ?
 C40 C41 H41 119.8 . . ?
 C40 C41 C42 120.45(15) . . ?
 C42 C41 H41 119.8 . . ?
 C41 C42 H42 120.1 . . ?
 C41 C42 C43 119.75(16) . . ?
 C43 C42 H42 120.1 . . ?
 C42 C43 H43 120.0 . . ?
 C44 C43 C42 120.09(15) . . ?
 C44 C43 H43 120.0 . . ?
 C39 C44 P1 120.25(12) . . ?
 C43 C44 P1 119.99(12) . . ?
 C43 C44 C39 119.76(14) . . ?
 C48 O1 C45 108.92(15) . . ?
 O1 C45 H45A 110.6 . . ?
 O1 C45 H45B 110.6 . . ?
 O1 C45 C46 105.61(16) . . ?
 H45A C45 H45B 108.7 . . ?
 C46 C45 H45A 110.6 . . ?
 C46 C45 H45B 110.6 . . ?
 C45 C46 H46A 111.4 . . ?
 C45 C46 H46B 111.4 . . ?
 C45 C46 C47 102.06(17) . . ?
 H46A C46 H46B 109.2 . . ?
 C47 C46 H46A 111.4 . . ?
 C47 C46 H46B 111.4 . . ?
 C46 C47 H47A 111.4 . . ?
 C46 C47 H47B 111.4 . . ?
 H47A C47 H47B 109.3 . . ?
 C48 C47 C46 101.87(18) . . ?
 C48 C47 H47A 111.4 . . ?
 C48 C47 H47B 111.4 . . ?
 O1 C48 C47 108.44(17) . . ?
 O1 C48 H48A 110.0 . . ?
 O1 C48 H48B 110.0 . . ?
 C47 C48 H48A 110.0 . . ?
 C47 C48 H48B 110.0 . . ?
 H48A C48 H48B 108.4 . . ?

loop_
  _geom_torsion_atom_site_label_1
  _geom_torsion_atom_site_label_2
  _geom_torsion_atom_site_label_3
  _geom_torsion_atom_site_label_4
  _geom_torsion
  _geom_torsion_site_symmetry_1
  _geom_torsion_site_symmetry_2
  _geom_torsion_site_symmetry_3
  _geom_torsion_site_symmetry_4
  _geom_torsion_publ_flag
 P1 C1 C2 N1 -48.82(17) . . . . ?
 P1 C1 C2 N2 64.05(17) . . . . ?
 P1 C1 C2 C19 -171.51(11) . . . . ?
 P1 C1 C11 C12 -5.0(2) . . . . ?
 N1 C2 C19 C20 33.8(9) . . . . ?
 N1 C4 C5 C6 178.37(17) . . . . ?
 N1 C4 C9 N2 -1.89(18) . . . . ?
 N1 C4 C9 C8 179.79(15) . . . . ?
 N2 C2 C19 C20 -73.5(9) . . . . ?
 C1 P1 C32 C27 -43.26(15) . . . . ?
 C1 P1 C32 C31 132.25(14) . . . . ?
 C1 P1 C38 C33 96.91(14) . . . . ?
 C1 P1 C38 C37 -83.38(14) . . . . ?
 C1 P1 C44 C39 170.07(12) . . . . ?
 C1 P1 C44 C43 -9.61(15) . . . . ?
 C1 C2 C19 C20 159.9(8) . . . . ?
 C1 C11 C12 C18 166.48(16) . . . . ?
 C2 N1 C4 C5 164.02(17) . . . . ?
 C2 N1 C4 C9 -17.37(17) . . . . ?
 C2 N2 C9 C4 20.08(17) . . . . ?
 C2 N2 C9 C8 -161.81(17) . . . . ?
 C2 C1 C11 C12 170.03(16) . . . . ?
 C3 N1 C2 N2 169.86(13) . . . . ?
 C3 N1 C2 C1 -69.25(18) . . . . ?
 C3 N1 C2 C19 55.92(18) . . . . ?
 C3 N1 C4 C5 22.3(3) . . . . ?
 C3 N1 C4 C9 -159.06(15) . . . . ?
 C4 N1 C2 N2 27.70(15) . . . . ?
 C4 N1 C2 C1 148.59(13) . . . . ?
 C4 N1 C2 C19 -86.24(15) . . . . ?
 C4 C5 C6 C7 1.3(3) . . . . ?
 C5 C4 C9 N2 176.87(15) . . . . ?
 C5 C4 C9 C8 -1.5(3) . . . . ?
 C5 C6 C7 C8 -1.0(3) . . . . ?
 C6 C7 C8 C9 -0.5(3) . . . . ?
 C7 C8 C9 N2 -176.18(17) . . . . ?
 C7 C8 C9 C4 1.7(3) . . . . ?
 C9 N2 C2 N1 -28.64(15) . . . . ?
 C9 N2 C2 C1 -149.91(13) . . . . ?
 C9 N2 C2 C19 84.05(15) . . . . ?
 C9 C4 C5 C6 -0.1(3) . . . . ?
 C10 N2 C2 N1 -166.36(13) . . . . ?
 C10 N2 C2 C1 72.37(18) . . . . ?
 C10 N2 C2 C19 -53.67(18) . . . . ?
 C10 N2 C9 C4 156.80(14) . . . . ?
 C10 N2 C9 C8 -25.1(3) . . . . ?
 C11 C1 C2 N1 136.14(15) . . . . ?
 C11 C1 C2 N2 -110.98(16) . . . . ?
 C11 C1 C2 C19 13.4(2) . . . . ?
 C11 C12 C18 C13 15.8(3) . . . . ?
 C11 C12 C18 C17 -162.74(17) . . . . ?
 C13 C14 C15 C16 -0.8(3) . . . . ?
 C14 C13 C18 C12 -176.73(16) . . . . ?
 C14 C13 C18 C17 1.8(3) . . . . ?
 C14 C15 C16 C17 0.7(3) . . . . ?
 C15 C16 C17 C18 0.7(3) . . . . ?
 C16 C17 C18 C12 176.65(17) . . . . ?
 C16 C17 C18 C13 -2.0(3) . . . . ?
 C18 C13 C14 C15 -0.4(3) . . . . ?
 C21 C22 C23 C24 0.1(3) . . . . ?
 C22 C21 C26 C20 177.04(16) . . . . ?
 C22 C21 C26 C25 -1.2(3) . . . . ?
 C22 C23 C24 C25 0.2(3) . . . . ?
 C23 C24 C25 C26 -1.0(3) . . . . ?
 C24 C25 C26 C20 -176.76(15) . . . . ?
 C24 C25 C26 C21 1.5(2) . . . . ?
 C26 C21 C22 C23 0.4(3) . . . . ?
 C27 C28 C29 C30 0.8(3) . . . . ?
 C28 C27 C32 P1 175.45(13) . . . . ?
 C28 C27 C32 C31 -0.2(2) . . . . ?
 C28 C29 C30 C31 -0.4(3) . . . . ?
 C29 C30 C31 C32 -0.3(2) . . . . ?
 C30 C31 C32 P1 -174.84(12) . . . . ?
 C30 C31 C32 C27 0.6(2) . . . . ?
 C32 P1 C1 C2 141.35(12) . . . . ?
 C32 P1 C1 C11 -43.49(15) . . . . ?
 C32 P1 C38 C33 -25.16(15) . . . . ?
 C32 P1 C38 C37 154.54(12) . . . . ?
 C32 P1 C44 C39 -70.04(14) . . . . ?
 C32 P1 C44 C43 110.29(13) . . . . ?
 C32 C27 C28 C29 -0.5(3) . . . . ?
 C33 C34 C35 C36 0.6(3) . . . . ?
 C34 C33 C38 P1 -178.92(13) . . . . ?
 C34 C33 C38 C37 1.4(2) . . . . ?
 C34 C35 C36 C37 0.4(2) . . . . ?
 C35 C36 C37 C38 -0.6(2) . . . . ?
 C36 C37 C38 P1 179.95(12) . . . . ?
 C36 C37 C38 C33 -0.3(2) . . . . ?
 C38 P1 C1 C2 19.85(15) . . . . ?
 C38 P1 C1 C11 -164.98(12) . . . . ?
 C38 P1 C32 C27 82.73(14) . . . . ?
 C38 P1 C32 C31 -101.76(14) . . . . ?
 C38 P1 C44 C39 43.27(14) . . . . ?
 C38 P1 C44 C43 -136.40(13) . . . . ?
 C38 C33 C34 C35 -1.5(2) . . . . ?
 C39 C40 C41 C42 -0.5(2) . . . . ?
 C40 C39 C44 P1 179.84(12) . . . . ?
 C40 C39 C44 C43 -0.5(2) . . . . ?
 C40 C41 C42 C43 0.2(2) . . . . ?
 C41 C42 C43 C44 0.0(2) . . . . ?
 C42 C43 C44 P1 179.87(12) . . . . ?
 C42 C43 C44 C39 0.2(2) . . . . ?
 C44 P1 C1 C2 -100.68(13) . . . . ?
 C44 P1 C1 C11 74.48(14) . . . . ?
 C44 P1 C32 C27 -166.86(13) . . . . ?
 C44 P1 C32 C31 8.65(15) . . . . ?
 C44 P1 C38 C33 -136.77(13) . . . . ?
 C44 P1 C38 C37 42.94(14) . . . . ?
 C44 C39 C40 C41 0.6(2) . . . . ?
 O1 C45 C46 C47 35.9(2) . . . . ?
 C45 O1 C48 C47 3.6(3) . . . . ?
 C45 C46 C47 C48 -32.3(2) . . . . ?
 C46 C47 C48 O1 18.6(3) . . . . ?
 C48 O1 C45 C46 -25.2(2) . . . . ?

_shelx_SHELXL_version_number      '2014/7'
_iucr_refine_instructions_details
;

    i16201.res created by SHELXL-2014/7

TITL i16201_a.res in P-1
REM Old TITL i16201 in P-1 #2
REM SHELXT solution in P-1
REM R1 0.136, Rweak 0.004, Alpha 0.042, Orientation as input
REM Formula found by SHELXT: C47 N4 P
CELL 0.71073 11.6039 12.8943 13.8287 73.342 88.592 72.775
ZERR 2 0.0004 0.0005 0.0008 0.002 0.003 0.002
LATT 1
SFAC C H N O P
UNIT 96 90 4 2 2
 
L.S. 20
PLAN  20
SIZE 0.1 0.4 0.6
TEMP 23
BOND $H
LIST 6
fmap 2
MORE -1
ACTA 52
CONF
REM <olex2.extras>
REM <HklSrc "%./i16201.hkl">
REM </olex2.extras>
 
WGHT    0.044300    1.360200
FVAR       0.61771
P1    5    0.741007    0.648264    0.594833    11.00000    0.01399    0.02142 =
         0.01753   -0.00647    0.00237   -0.00780
N1    3    0.616840    0.595908    0.802165    11.00000    0.01984    0.02714 =
         0.01935   -0.00588    0.00444   -0.00775
N2    3    0.616228    0.779887    0.761594    11.00000    0.01848    0.02937 =
         0.02474   -0.01334    0.00347   -0.01057
C1    1    0.591842    0.703573    0.618266    11.00000    0.01540    0.02392 =
         0.01876   -0.00794    0.00261   -0.00857
C2    1    0.561878    0.705480    0.724332    11.00000    0.01539    0.02313 =
         0.02134   -0.00842    0.00321   -0.00727
C3    1    0.573969    0.500168    0.806404    11.00000    0.03204    0.02907 =
         0.02936   -0.00670    0.01049   -0.01333
AFIX 137
H3A   2    0.504214    0.504002    0.845605    11.00000   -1.50000
H3B   2    0.636577    0.430815    0.837326    11.00000   -1.50000
H3C   2    0.552688    0.502199    0.739093    11.00000   -1.50000
AFIX   0
C4    1    0.640009    0.619189    0.890778    11.00000    0.01425    0.04339 =
         0.01988   -0.00938    0.00431   -0.00877
C5    1    0.665074    0.549073    0.988965    11.00000    0.02386    0.05793 =
         0.02262   -0.00403    0.00354   -0.01277
AFIX  43
H5    2    0.666772    0.473446    1.005305    11.00000   -1.20000
AFIX   0
C6    1    0.687856    0.596689    1.062992    11.00000    0.03261    0.09521 =
         0.01990   -0.01032    0.00124   -0.02670
AFIX  43
H6    2    0.706682    0.551246    1.129636    11.00000   -1.20000
AFIX   0
C7    1    0.683015    0.708754    1.039374    11.00000    0.03783    0.09700 =
         0.02852   -0.02961    0.00676   -0.03535
AFIX  43
H7    2    0.697299    0.738080    1.090431    11.00000   -1.20000
AFIX   0
C8    1    0.657000    0.779739    0.939954    11.00000    0.02880    0.06562 =
         0.03412   -0.02787    0.00873   -0.02460
AFIX  43
H8    2    0.653116    0.855884    0.924049    11.00000   -1.20000
AFIX   0
C9    1    0.637269    0.732756    0.866183    11.00000    0.01561    0.04549 =
         0.02353   -0.01528    0.00558   -0.01263
C10   1    0.564673    0.901508    0.719325    11.00000    0.03254    0.02941 =
         0.03927   -0.01775    0.00930   -0.01267
AFIX 137
H10A  2    0.547384    0.919602    0.647844    11.00000   -1.50000
H10B  2    0.621165    0.938588    0.731245    11.00000   -1.50000
H10C  2    0.491276    0.927001    0.750851    11.00000   -1.50000
AFIX   0
C11   1    0.501930    0.754119    0.535438    11.00000    0.01426    0.02263 =
         0.02477   -0.00927    0.00364   -0.00786
AFIX  43
H11   2    0.422676    0.776739    0.553507    11.00000   -1.20000
AFIX   0
C12   1    0.515043    0.773939    0.434614    11.00000    0.01462    0.02516 =
         0.02328   -0.00605    0.00257   -0.00732
AFIX  43
H12   2    0.592846    0.767702    0.413425    11.00000   -1.20000
AFIX   0
C13   1    0.295269    0.843082    0.370211    11.00000    0.01966    0.03137 =
         0.02370   -0.00433    0.00176   -0.00777
AFIX  43
H13   2    0.270837    0.854573    0.431865    11.00000   -1.20000
AFIX   0
C14   1    0.208917    0.864720    0.293762    11.00000    0.01917    0.04094 =
         0.03024    0.00160   -0.00253   -0.01075
AFIX  43
H14   2    0.127429    0.890004    0.305173    11.00000   -1.20000
AFIX   0
C15   1    0.241327    0.849538    0.201198    11.00000    0.02924    0.04908 =
         0.02572    0.00158   -0.00944   -0.01764
AFIX  43
H15   2    0.182631    0.863355    0.150623    11.00000   -1.20000
AFIX   0
C16   1    0.363256    0.813224    0.184799    11.00000    0.03743    0.05486 =
         0.02177   -0.01002   -0.00104   -0.01559
AFIX  43
H16   2    0.386781    0.803319    0.122460    11.00000   -1.20000
AFIX   0
C17   1    0.449997    0.791685    0.260852    11.00000    0.02289    0.03842 =
         0.02486   -0.00768    0.00125   -0.00696
AFIX  43
H17   2    0.531274    0.768265    0.248188    11.00000   -1.20000
AFIX   0
C18   1    0.419084    0.804081    0.356132    11.00000    0.01895    0.02029 =
         0.02068   -0.00424    0.00045   -0.00714
C19   1    0.428201    0.739556    0.735828    11.00000    0.01950    0.02685 =
         0.01962   -0.00881    0.00246   -0.00960
C20   1    0.326741    0.758140    0.762056    11.00000    0.01978    0.02519 =
         0.02029   -0.00885    0.00229   -0.00806
C21   1    0.176014    0.787271    0.888143    11.00000    0.02166    0.03111 =
         0.02269   -0.00707    0.00218   -0.00823
AFIX  43
H21   2    0.238042    0.768662    0.937237    11.00000   -1.20000
AFIX   0
C22   1    0.056358    0.817829    0.912820    11.00000    0.02655    0.03543 =
         0.02491   -0.00930    0.00946   -0.00879
AFIX  43
H22   2    0.038313    0.820141    0.978211    11.00000   -1.20000
AFIX   0
C23   1   -0.036127    0.844875    0.839835    11.00000    0.01660    0.03134 =
         0.03711   -0.00844    0.00868   -0.00841
AFIX  43
H23   2   -0.116251    0.865455    0.856311    11.00000   -1.20000
AFIX   0
C24   1   -0.009558    0.841330    0.742691    11.00000    0.01843    0.02605 =
         0.03254   -0.00872    0.00122   -0.00863
AFIX  43
H24   2   -0.071907    0.859770    0.693926    11.00000   -1.20000
AFIX   0
C25   1    0.109159    0.810530    0.717676    11.00000    0.02063    0.02431 =
         0.02361   -0.00911    0.00346   -0.00910
AFIX  43
H25   2    0.126476    0.807151    0.652426    11.00000   -1.20000
AFIX   0
C26   1    0.203455    0.784397    0.790089    11.00000    0.01749    0.02004 =
         0.02479   -0.00773    0.00468   -0.00692
C27   1    0.674486    0.497028    0.518471    11.00000    0.02169    0.02585 =
         0.02455   -0.00833    0.00550   -0.01048
AFIX  43
H27   2    0.629135    0.487691    0.574952    11.00000   -1.20000
AFIX   0
C28   1    0.669320    0.440252    0.448342    11.00000    0.02536    0.02634 =
         0.03167   -0.01116    0.00024   -0.01134
AFIX  43
H28   2    0.620953    0.392532    0.458178    11.00000   -1.20000
AFIX   0
C29   1    0.735730    0.454137    0.363717    11.00000    0.02686    0.02674 =
         0.02519   -0.01298   -0.00249   -0.00443
AFIX  43
H29   2    0.731206    0.416498    0.316419    11.00000   -1.20000
AFIX   0
C30   1    0.809137    0.524242    0.349358    11.00000    0.02065    0.03029 =
         0.02161   -0.01052    0.00384   -0.00402
AFIX  43
H30   2    0.854169    0.533258    0.292661    11.00000   -1.20000
AFIX   0
C31   1    0.815238    0.580868    0.419738    11.00000    0.01669    0.02549 =
         0.02219   -0.00675    0.00207   -0.00739
AFIX  43
H31   2    0.864769    0.627509    0.410189    11.00000   -1.20000
AFIX   0
C32   1    0.747402    0.568192    0.504825    11.00000    0.01541    0.02128 =
         0.02008   -0.00699    0.00007   -0.00511
C33   1    0.867173    0.438331    0.729545    11.00000    0.02169    0.02627 =
         0.02242   -0.00785    0.00419   -0.00733
AFIX  43
H33   2    0.835822    0.405525    0.688890    11.00000   -1.20000
AFIX   0
C34   1    0.941712    0.370148    0.815460    11.00000    0.02810    0.02500 =
         0.02753   -0.00411    0.00447   -0.00350
AFIX  43
H34   2    0.958641    0.291683    0.833085    11.00000   -1.20000
AFIX   0
C35   1    0.990881    0.418574    0.874933    11.00000    0.02095    0.03679 =
         0.01955   -0.00343    0.00095   -0.00248
AFIX  43
H35   2    1.041274    0.372547    0.931961    11.00000   -1.20000
AFIX   0
C36   1    0.965117    0.535192    0.849597    11.00000    0.01779    0.03806 =
         0.02145   -0.01012    0.00223   -0.00904
AFIX  43
H36   2    0.998661    0.567493    0.889345    11.00000   -1.20000
AFIX   0
C37   1    0.889450    0.604023    0.765137    11.00000    0.01633    0.02573 =
         0.02328   -0.00718    0.00368   -0.00770
AFIX  43
H37   2    0.871732    0.682495    0.748652    11.00000   -1.20000
AFIX   0
C38   1    0.839653    0.555996    0.704623    11.00000    0.01501    0.02569 =
         0.01854   -0.00730    0.00396   -0.00661
C39   1    0.941871    0.720599    0.529826    11.00000    0.01806    0.02660 =
         0.01969   -0.00583   -0.00049   -0.00811
AFIX  43
H39   2    0.986728    0.644381    0.553496    11.00000   -1.20000
AFIX   0
C40   1    0.998932    0.801697    0.486185    11.00000    0.01901    0.03798 =
         0.02051   -0.00806    0.00132   -0.01486
AFIX  43
H40   2    1.082006    0.779738    0.480007    11.00000   -1.20000
AFIX   0
C41   1    0.932510    0.914990    0.451911    11.00000    0.03152    0.03409 =
         0.02122   -0.00683    0.00323   -0.02211
AFIX  43
H41   2    0.971229    0.969112    0.423142    11.00000   -1.20000
AFIX   0
C42   1    0.808411    0.948629    0.460100    11.00000    0.03142    0.02390 =
         0.02400   -0.00677    0.00143   -0.01165
AFIX  43
H42   2    0.764054    1.025016    0.436754    11.00000   -1.20000
AFIX   0
C43   1    0.750507    0.867566    0.503417    11.00000    0.02042    0.02617 =
         0.02036   -0.00822    0.00149   -0.00929
AFIX  43
H43   2    0.667338    0.889850    0.509041    11.00000   -1.20000
AFIX   0
C44   1    0.816689    0.753702    0.538161    11.00000    0.01795    0.02484 =
         0.01634   -0.00744    0.00120   -0.01013
 
O1    4    1.086568    0.096406    0.879988    11.00000    0.03836    0.04912 =
         0.03042   -0.00956    0.00183    0.00393
C45   1    1.119445    0.102516    0.779372    11.00000    0.04202    0.03547 =
         0.02928   -0.01159    0.00122   -0.00531
AFIX  23
H45A  2    1.065850    0.169436    0.731804    11.00000   -1.20000
H45B  2    1.115443    0.035796    0.762133    11.00000   -1.20000
AFIX   0
C46   1    1.246768    0.108658    0.777096    11.00000    0.05177    0.07481 =
         0.02697   -0.01713    0.00801   -0.03179
AFIX  23
H46A  2    1.248479    0.185722    0.767383    11.00000   -1.20000
H46B  2    1.289086    0.080256    0.724149    11.00000   -1.20000
AFIX   0
C47   1    1.301072    0.031505    0.882180    11.00000    0.03820    0.05718 =
         0.03773   -0.01746    0.00359   -0.01221
AFIX  23
H47A  2    1.332539   -0.047247    0.882695    11.00000   -1.20000
H47B  2    1.364992    0.054573    0.905573    11.00000   -1.20000
AFIX   0
C48   1    1.192631    0.049828    0.945523    11.00000    0.03846    0.07556 =
         0.02670   -0.01336    0.00219   -0.01759
AFIX  23
H48A  2    1.191859   -0.021831    0.992926    11.00000   -1.20000
H48B  2    1.196686    0.101270    0.983676    11.00000   -1.20000
AFIX   0
HKLF 4
 
REM  i16201_a.res in P-1
REM R1 =  0.0447 for    6656 Fo > 4sig(Fo)  and  0.0617 for all    8402 data
REM    471 parameters refined using      0 restraints
 
END  
     
WGHT      0.0443      1.3600 

REM Highest difference peak  0.825,  deepest hole -0.466,  1-sigma level  0.050
Q1    1   1.1370  0.1396  0.8868  11.00000  0.05    0.82
Q2    1   1.2865  0.0355  0.7805  11.00000  0.05    0.38
Q3    1   0.7742  0.5829  0.5545  11.00000  0.05    0.29
Q4    1   0.5824  0.6985  0.6701  11.00000  0.05    0.29
Q5    1   0.4619  0.7957  0.3977  11.00000  0.05    0.26
Q6    1   1.1587  0.1637  0.7796  11.00000  0.05    0.26
Q7    1   0.6009  0.7294  0.4024  11.00000  0.05    0.26
Q8    1   1.2043  0.0425  1.0186  11.00000  0.05    0.24
Q9    1   0.6511  0.6774  0.6162  11.00000  0.05    0.22
Q10   1   0.8134  0.5914  0.6582  11.00000  0.05    0.22
Q11   1   0.6431  0.6743  0.8845  11.00000  0.05    0.22
Q12   1   0.7951  0.7088  0.5705  11.00000  0.05    0.22
Q13   1   0.6783  0.7419  0.8946  11.00000  0.05    0.21
Q14   1   0.5021  0.8018  0.4820  11.00000  0.05    0.21
Q15   1   0.6319  0.7555  0.8184  11.00000  0.05    0.21
Q16   1   0.1792  0.8162  0.8289  11.00000  0.05    0.21
Q17   1   0.7200  0.5284  0.5174  11.00000  0.05    0.20
Q18   1   0.7903  0.5769  0.3717  11.00000  0.05    0.20
Q19   1   0.6462  0.5885  0.9411  11.00000  0.05    0.20
Q20   1   0.1855  0.7552  0.8478  11.00000  0.05    0.20

  REM The information below was added by Olex2.
  REM
  REM R1 = 0.0447 for 6656 Fo > 4sig(Fo) and 0.0617 for all 102653 data
  REM n/a parameters refined using n/a restraints
  REM Highest difference peak 0.82, deepest hole -0.47
  REM Mean Shift 0, Max Shift -0.001.
  
  REM +++ Tabular Listing of Refinement Information +++
  REM R1_all = 0.0617
  REM R1_gt = 0.0447
  REM wR_ref = 0.1168
  REM GOOF = 1.026
  REM Shift_max = -0.001
  REM Shift_mean = 0
  REM Reflections_all = 102653
  REM Reflections_gt = 6656
  REM Parameters = n/a
  REM Hole = -0.47
  REM Peak = 0.82
  REM Flack = n/a
  
  
;
_olex2_exptl_crystal_mounting_method
;
The data was collected under N2 stream at 100 K 
;
_olex2_submission_special_instructions 'No special instructions were received'
loop_
  _refln_index_h
  _refln_index_k
  _refln_index_l
  _refln_F_squared_meas
  _refln_F_squared_sigma
 1 0 0 4.1 0.6
 1 0 0 1.4 0.8
 1 0 0 1.6 0.7
 1 0 0 3.1 0.6
 1 0 0 1.8 0.8
 1 0 0 4.7 0.7
 1 0 0 2.8 0.5
 1 0 0 3.7 0.6
 -1 0 0 3.7 0.9
 -1 0 0 2.7 0.7
 -1 0 0 3.9 0.6
 -1 0 0 4.2 0.7
 -1 0 0 3.9 0.6
 -1 0 0 4 0.6
 -1 0 0 3.5 0.6
 -1 0 0 4.4 0.6
 2 0 0 726.03 50.19
 2 0 0 825.42 49.7
 2 0 0 761.42 50.59
 2 0 0 870.71 49.7
 2 0 0 843.82 49.7
 2 0 0 935.41 50.89
 2 0 0 876.81 50.09
 2 0 0 851.01 49.8
 2 0 0 873.21 49.7
 -2 0 0 794.92 50.59
 -2 0 0 767.52 50.29
 -2 0 0 892.61 50.09
 -2 0 0 829.62 49.8
 -2 0 0 865.31 49.7
 -2 0 0 850.21 49.7
 -2 0 0 862.61 49.8
 -2 0 0 876.61 49.7
 3 0 0 1029.8 59.19
 3 0 0 999.4 57.99
 3 0 0 990.1 57.49
 3 0 0 964.2 58.69
 3 0 0 1068.09 59.09
 3 0 0 972.8 57.49
 3 0 0 968.8 57.19
 3 0 0 976.1 57.49
 3 0 0 880.91 58.79
 3 0 0 810.12 58.19
 3 0 0 959.4 57.49
 -3 0 0 946.31 58.89
 -3 0 0 1012.4 57.49
 -3 0 0 983.3 57.49
 -3 0 0 992 57.99
 -3 0 0 908.21 58.39
 -3 0 0 994.3 57.49
 -3 0 0 1028.1 57.69
 -3 0 0 949.4 57.49
 4 0 0 0.5 1.8
 4 0 0 2.1 1.1
 4 0 0 2.9 1.2
 4 0 0 3.2 1.4
 4 0 0 -0.8 1.9
 4 0 0 2.1 1.9
 4 0 0 4.8 2.2
 4 0 0 2.6 2.5
 4 0 0 2.3 1.2
 4 0 0 -0.6 1.5
 4 0 0 2.6 2.1
 4 0 0 1.6 1.7
 4 0 0 4.1 2.8
 -4 0 0 1.1 1.2
 -4 0 0 1.9 1.9
 -4 0 0 4.4 1.8
 -4 0 0 3.2 1.5
 -4 0 0 2.8 1.3
 -4 0 0 2.8 2.3
 -4 0 0 4.1 1.2
 -4 0 0 3.1 1.6
 5 0 0 229.38 14.5
 5 0 0 214.38 16.4
 5 0 0 235.38 17
 5 0 0 238.28 14.5
 5 0 0 197.68 16.7
 5 0 0 252.27 16.9
 5 0 0 231.88 15.9
 5 0 0 229.18 16.5
 5 0 0 232.38 16.7
 5 0 0 227.58 17.3
 5 0 0 254.17 18
 5 0 0 224.18 14.8
 -5 0 0 238.18 14.6
 -5 0 0 223.28 14.7
 -5 0 0 230.48 14.7
 -5 0 0 207.48 16.7
 -5 0 0 222.58 16.2
 -5 0 0 229.58 15.5
 -5 0 0 216.38 14.7
 -5 0 0 244.18 15.2
 6 0 0 0.7 1.7
 6 0 0 1.7 2.1
 6 0 0 3.4 2.8
 6 0 0 4.9 4.5
 6 0 0 -0.1 0.8
 6 0 0 0.4 2.7
 6 0 0 5.4 3.5
 6 0 0 -0.3 3
 6 0 0 2.1 2.5
 6 0 0 0.4 1.2
 6 0 0 4.7 3.2
 -6 0 0 5.3 2.4
 -6 0 0 0.8 2.4
 -6 0 0 -0.7 1.9
 -6 0 0 2.3 1.6
 -6 0 0 0.7 1.6
 -6 0 0 -0.4 1.3
 -6 0 0 2.2 1.5
 -6 0 0 0.3 1.4
 7 0 0 4.9 2.3
 7 0 0 4.2 3.4
 7 0 0 4.7 4.1
 7 0 0 3.6 3.4
 7 0 0 2.9 3.5
 7 0 0 3.7 3.9
 7 0 0 5.7 3
 7 0 0 1.8 4.1
 7 0 0 2.1 3.2
 -7 0 0 6.3 2.2
 -7 0 0 6.7 2.1
 -7 0 0 8 3.4
 -7 0 0 5.7 2.1
 -7 0 0 1 2.8
 -7 0 0 6.2 2.8
 -7 0 0 7.1 2.6
 -7 0 0 4 1.9
 8 0 0 4.5 3.7
 8 0 0 0.8 4.2
 8 0 0 7.7 5.2
 8 0 0 5.3 4.2
 8 0 0 0.5 2.7
 8 0 0 5.4 3.7
 8 0 0 -3.3 3.4
 -8 0 0 4 2.9
 -8 0 0 1.4 2.5
 -8 0 0 8.9 3.8
 -8 0 0 5 2.2
 -8 0 0 3.2 2
 -8 0 0 2 2.1
 -8 0 0 5.7 2.3
 -8 0 0 8.6 3.9
 9 0 0 4.4 4.3
 9 0 0 -0.8 4.2
 9 0 0 0.5 5.2
 9 0 0 5.1 4.3
 9 0 0 2.9 3.3
 9 0 0 -1.4 4.4
 9 0 0 0 3.8
 -9 0 0 1.1 2.2
 -9 0 0 7.4 4.6
 -9 0 0 2.4 3.8
 -9 0 0 -1.3 1.5
 -9 0 0 1.1 2.3
 -9 0 0 2.4 3.5
 -9 0 0 3.6 2.3
 -9 0 0 0.8 3.1
 -9 0 0 1.4 2.6
 -9 0 0 -1.1 3.1
 -9 0 0 1 2.2
 10 0 0 10.2 5.5
 10 0 0 8.1 5.4
 10 0 0 16.8 7.2
 10 0 0 18.9 5.5
 10 0 0 8.2 6.4
 10 0 0 6 6.8
 -10 0 0 10.4 3.4
 -10 0 0 10.4 5.2
 -10 0 0 22.9 7.5
 -10 0 0 15.4 4.1
 -10 0 0 11.7 3
 -10 0 0 17.5 3.4
 -10 0 0 22.4 6.6
 -10 0 0 21.7 4.1
 -10 0 0 6.3 4.1
 -10 0 0 19.3 5.7
 11 0 0 20.7 7.1
 11 0 0 34.6 7.1
 11 0 0 25.7 7.3
 11 0 0 32 9.5
 11 0 0 10.2 6.1
 11 0 0 22.7 9.4
 -11 0 0 28.1 5.2
 -11 0 0 8.7 5.9
 -11 0 0 22.5 4.4
 -11 0 0 36.9 9.3
 -11 0 0 32.8 7.5
 -11 0 0 30.8 6.3
 12 0 0 122.19 19
 12 0 0 105.29 18.1
 12 0 0 128.69 19.2
 12 0 0 129.59 15
 12 0 0 100.99 14.9
 12 0 0 97.89 14.5
 -12 0 0 140.59 16
 -12 0 0 139.19 18.3
 -12 0 0 112.39 10.4
 -12 0 0 97.39 9.8
 13 0 0 121.79 18.1
 13 0 0 163.48 23.7
 13 0 0 210.78 17.7
 13 0 0 192.18 26.3
 13 0 0 207.58 19.7
 13 0 0 182.88 23.9
 -13 0 0 191.38 19.4
 -13 0 0 184.48 14.5
 -13 0 0 174.88 17.8
 -13 0 0 149.59 13.7
 14 0 0 27.4 7.8
 14 0 0 29.7 11.4
 14 0 0 24.5 10.2
 14 0 0 34.6 11.6
 -14 0 0 18.5 5.2
 -14 0 0 25.3 8.9
 -14 0 0 25.6 8.8
 -13 1 1 9 6
 -13 1 1 21.8 5.3
 -13 1 1 14.5 6.9
 -13 1 1 21.5 5.6
 13 -1 -1 7.3 8.7
 13 -1 -1 18.7 9.3
 13 -1 -1 11.9 8.7
 13 -1 -1 19.4 7.5
 -12 1 1 1.9 4.7
 -12 1 1 8.7 3.6
 -12 1 1 7 3.6
 -12 1 1 5.3 5.3
 12 -1 -1 0 6.4
 12 -1 -1 4.7 7.4
 12 -1 -1 11.7 6.5
 12 -1 -1 8.3 6.7
 12 -1 -1 10 9.1
 -11 1 1 52.69 10.8
 -11 1 1 48.5 7.3
 -11 1 1 46.2 7.1
 -11 1 1 33 6.9
 -11 1 1 42.6 8.6
 11 -1 -1 48.8 11.6
 11 -1 -1 48.9 11.7
 11 -1 -1 47.5 12.5
 11 -1 -1 63.59 11.6
 11 -1 -1 51.39 9
 -10 1 1 57.69 9.8
 -10 1 1 65.69 8.6
 -10 1 1 50.69 7.9
 -10 1 1 54.49 10.2
 -10 1 1 53.79 7.2
 -10 1 1 74.79 11.9
 -10 1 1 63.19 7.9
 10 -1 -1 53.69 12
 10 -1 -1 71.29 12.9
 10 -1 -1 61.79 9.6
 10 -1 -1 52.19 11.6
 10 -1 -1 50.09 9.5
 10 -1 -1 75.29 11.6
 -9 1 1 173.28 13.1
 -9 1 1 183.88 14.4
 -9 1 1 184.78 13.5
 -9 1 1 160.58 13.9
 -9 1 1 167.28 12.2
 -9 1 1 152.78 15.2
 -9 1 1 181.68 16.9
 -9 1 1 183.88 11.3
 9 -1 -1 160.48 14.9
 9 -1 -1 160.28 12.6
 9 -1 -1 159.88 15.4
 9 -1 -1 183.78 17.7
 9 -1 -1 154.08 16.7
 9 -1 -1 171.18 16.8
 9 -1 -1 192.18 19.2
 9 -1 -1 168.48 15.9
 -8 1 1 172.98 13.3
 -8 1 1 189.98 11.9
 -8 1 1 199.98 16.9
 -8 1 1 184.68 15.5
 -8 1 1 171.88 13.3
 -8 1 1 204.08 14.6
 -8 1 1 163.28 13.9
 -8 1 1 182.48 13.3
 -8 1 1 184.98 12.6
 8 -1 -1 181.58 15.8
 8 -1 -1 193.88 17.4
 8 -1 -1 172.18 15.5
 8 -1 -1 174.38 16.9
 8 -1 -1 165.78 12.8
 8 -1 -1 182.18 16.8
 8 -1 -1 196.28 15.4
 8 -1 -1 183.78 17.9
 8 -1 -1 167.98 13.5
 -7 1 1 59.99 6.4
 -7 1 1 65.49 6.4
 -7 1 1 72.39 6.6
 -7 1 1 74.79 9.3
 -7 1 1 69.39 8
 -7 1 1 73.69 7.4
 -7 1 1 68.59 5.3
 -7 1 1 66.59 9.7
 -7 1 1 67.59 5.9
 -7 1 1 55.39 9.5
 7 -1 -1 67.79 9
 7 -1 -1 65.39 10.4
 7 -1 -1 64.69 6
 7 -1 -1 77.19 8.5
 7 -1 -1 62.59 6.2
 7 -1 -1 71.89 10.2
 7 -1 -1 87.89 10.4
 7 -1 -1 79.09 9.6
 7 -1 -1 92.79 11.9
 7 -1 -1 63.09 11.1
 -6 1 1 83.99 7.9
 -6 1 1 83.59 7.9
 -6 1 1 85.09 7.2
 -6 1 1 87.99 6.7
 -6 1 1 88.69 9.8
 -6 1 1 90.59 7.3
 -6 1 1 75.69 9.9
 -6 1 1 88.99 6.2
 -6 1 1 80.29 7.2
 -6 1 1 87.09 8.5
 6 -1 -1 104.99 10.1
 6 -1 -1 89.79 7.1
 6 -1 -1 83.69 7.5
 6 -1 -1 88.79 6.6
 6 -1 -1 103.49 11.6
 6 -1 -1 70.69 9.9
 6 -1 -1 86.99 8.7
 6 -1 -1 97.59 12.6
 6 -1 -1 88.39 8.1
 6 -1 -1 84.09 8.7
 6 -1 -1 88.39 8.4
 6 -1 -1 78.39 6.9
 -5 1 1 1564.14 93.69
 -5 1 1 1543.55 93.39
 -5 1 1 1620.84 92.89
 -5 1 1 1622.04 94.09
 -5 1 1 1513.35 94.79
 -5 1 1 1609.74 93.99
 -5 1 1 1392.96 94.29
 -5 1 1 1561.84 95.69
 -5 1 1 1574.24 93.49
 -5 1 1 1652.43 92.49
 5 -1 -1 1701.73 97.19
 5 -1 -1 1577.64 95.29
 5 -1 -1 1563.24 94.89
 5 -1 -1 1534.75 95.09
 5 -1 -1 1572.64 93.59
 5 -1 -1 1434.16 95.59
 5 -1 -1 1533.95 93.29
 5 -1 -1 1642.64 95.69
 5 -1 -1 1624.04 94.89
 5 -1 -1 1583.74 92.89
 5 -1 -1 1584.74 93.69
 5 -1 -1 1610.64 93.49
 5 -1 -1 1372.76 94.69
 5 -1 -1 1642.84 94.29
 -4 1 1 639.84 39
 -4 1 1 631.84 38.6
 -4 1 1 673.83 37.6
 -4 1 1 667.23 39
 -4 1 1 653.13 38.7
 -4 1 1 645.44 38
 -4 1 1 624.44 38.5
 -4 1 1 593.54 39.5
 -4 1 1 555.24 39.1
 -4 1 1 608.94 40.2
 4 -1 -1 657.23 39.1
 4 -1 -1 659.03 39.9
 4 -1 -1 636.84 38
 4 -1 -1 637.94 39.9
 4 -1 -1 613.64 38.6
 4 -1 -1 674.63 39.8
 4 -1 -1 581.34 40.2
 4 -1 -1 666.53 40.2
 4 -1 -1 635.34 38.4
 4 -1 -1 671.13 41.4
 4 -1 -1 574.24 39.5
 4 -1 -1 634.64 39.6
 4 -1 -1 644.64 38.8
 4 -1 -1 636.74 38.7
 4 -1 -1 601.64 39.8
 -3 1 1 2129.19 120.39
 -3 1 1 2047.7 120.19
 -3 1 1 2062.09 119.99
 -3 1 1 2108.09 119.59
 -3 1 1 2078.59 120.29
 -3 1 1 2028.3 119.99
 -3 1 1 1925.21 120.69
 -3 1 1 1981.2 121.29
 -3 1 1 1865.81 120.39
 3 -1 -1 2036.1 119.89
 3 -1 -1 1798.42 120.59
 3 -1 -1 2112.49 120.89
 3 -1 -1 2179.48 120.89
 3 -1 -1 2060.69 122.69
 3 -1 -1 2108.59 120.39
 3 -1 -1 1902.91 121.29
 3 -1 -1 2071.19 120.89
 3 -1 -1 1971.1 120.09
 3 -1 -1 2097.79 119.49
 3 -1 -1 2007.9 120.09
 3 -1 -1 2070.49 120.19
 -2 1 1 9419.56 544.15
 -2 1 1 8858.01 542.35
 -2 1 1 9794.02 544.15
 -2 1 1 9190.08 542.55
 -2 1 1 8663.53 543.35
 -2 1 1 9553.74 542.35
 -2 1 1 9392.56 542.95
 -2 1 1 9374.86 543.45
 -2 1 1 9234.58 542.45
 2 -1 -1 8515.35 541.95
 2 -1 -1 9293.87 542.25
 2 -1 -1 8709.53 542.35
 2 -1 -1 9999 542.85
 2 -1 -1 9590.04 542.45
 2 -1 -1 9415.86 541.65
 2 -1 -1 8934.41 541.65
 2 -1 -1 9257.07 541.65
 -1 1 1 279.27 18.5
 -1 1 1 346.67 18.5
 -1 1 1 300.77 18.5
 -1 1 1 300.87 18.5
 -1 1 1 339.67 18.9
 -1 1 1 302.77 18.6
 -1 1 1 312.67 18.7
 -1 1 1 298.67 18.2
 -1 1 1 282.27 18.2
 -1 1 1 286.77 18.6
 -1 1 1 282.27 18.8
 -1 1 1 297.27 18.6
 1 -1 -1 287.57 18.8
 1 -1 -1 315.67 18.9
 1 -1 -1 292.77 18.2
 1 -1 -1 275.57 18.5
 1 -1 -1 289.27 18.6
 1 -1 -1 310.87 18.6
 1 -1 -1 331.87 18.5
 1 -1 -1 299.17 18.5
 1 -1 -1 292.97 18.6
 0 1 1 350.96 22.5
 0 1 1 392.96 22.9
 0 1 1 337.27 22.8
 0 1 1 348.27 22.5
 0 1 1 435.96 22.9
 0 1 1 385.06 22.9
 0 1 1 382.46 23.4
 0 1 1 351.76 22.6
 0 1 1 358.26 22.8
 0 1 1 407.26 22.8
 0 1 1 339.57 22.7
 0 1 1 424.86 22.5
 0 -1 -1 377.36 22.6
 0 -1 -1 397.16 22.8
 0 -1 -1 348.07 22.8
 0 -1 -1 391.76 22.8
 0 -1 -1 386.46 22.5
 0 -1 -1 371.36 22.6
 0 -1 -1 375.16 23.3
 0 -1 -1 398.66 22.8
 0 -1 -1 388.86 22.9
 0 -1 -1 390.76 22.5
 1 1 1 2153.58 122.59
 1 1 1 2207.88 121.79
 1 1 1 1987.8 121.69
 1 1 1 2111.39 121.89
 1 1 1 2106.39 121.89
 1 1 1 1854.91 122.29
 1 1 1 2206.38 122.29
 1 1 1 2200.88 121.99
 1 1 1 2040.9 121.89
 -1 -1 -1 2121.69 121.89
 -1 -1 -1 2103.49 121.89
 -1 -1 -1 2018.1 121.89
 -1 -1 -1 2146.69 121.89
 -1 -1 -1 2006.1 121.79
 -1 -1 -1 1879.41 122.29
 2 1 1 142.99 10.2
 2 1 1 158.68 10.1
 2 1 1 177.58 10.3
 2 1 1 162.38 11.2
 2 1 1 154.38 10.3
 -2 -1 -1 138.19 10.2
 -2 -1 -1 152.48 10.1
 -2 -1 -1 158.58 9.4
 -2 -1 -1 156.58 10.2
 3 1 1 97.09 8.9
 3 1 1 111.69 7.9
 3 1 1 114.39 8.5
 3 1 1 136.29 9
 3 1 1 120.79 7.8
 3 1 1 91.69 8.2
 -3 -1 -1 98.89 8.2
 -3 -1 -1 104.79 6.9
 -3 -1 -1 107.79 6.7
 -3 -1 -1 111.49 7.8
 -3 -1 -1 94.69 7.7
 4 1 1 50.59 5.2
 4 1 1 49.2 6.4
 4 1 1 61.69 6.1
 4 1 1 60.99 7.7
 4 1 1 52.09 4.7
 4 1 1 60.39 5.8
 4 1 1 65.49 7.2
 -4 -1 -1 48.9 5.2
 -4 -1 -1 51.59 4.1
 -4 -1 -1 51.09 4.5
 -4 -1 -1 59.59 6.6
 -4 -1 -1 51.49 3.9
 -4 -1 -1 58.99 4.9
 -4 -1 -1 51.29 5.1
 5 1 1 70.99 7.4
 5 1 1 54.59 5.7
 5 1 1 49.2 4.5
 5 1 1 51.89 7.1
 5 1 1 52.39 6.9
 5 1 1 48.1 8
 5 1 1 52.29 6.1
 5 1 1 54.89 6.9
 5 1 1 67.99 8.2
 5 1 1 47.8 6.5
 5 1 1 52.89 6.8
 -5 -1 -1 46.6 3.9
 -5 -1 -1 43.5 3.8
 -5 -1 -1 45.4 5.5
 -5 -1 -1 50.79 5.5
 -5 -1 -1 44.6 5.9
 -5 -1 -1 51.29 6.9
 -5 -1 -1 43.5 4.3
 -5 -1 -1 46.6 4.1
 6 1 1 -1.5 2.4
 6 1 1 0.5 2.2
 6 1 1 1.5 1.7
 6 1 1 -0.3 2.2
 6 1 1 1.8 1.7
 6 1 1 -1.8 3
 6 1 1 2.1 2.7
 6 1 1 -2.6 2
 6 1 1 4.4 2.6
 6 1 1 -1.8 2.3
 -6 -1 -1 1 1.3
 -6 -1 -1 3.1 2.6
 -6 -1 -1 0.4 1.9
 -6 -1 -1 0.6 1.2
 -6 -1 -1 1.1 1.3
 -6 -1 -1 -1.8 1.3
 -6 -1 -1 0.8 1.2
 -6 -1 -1 3.3 2
 7 1 1 200.08 14.1
 7 1 1 184.08 15.8
 7 1 1 199.08 15.2
 7 1 1 179.28 15.7
 7 1 1 188.88 15.2
 7 1 1 198.18 16.5
 7 1 1 194.38 16.9
 7 1 1 186.08 12.6
 7 1 1 201.48 16
 7 1 1 194.38 15.6
 -7 -1 -1 174.58 14.5
 -7 -1 -1 188.18 15.6
 -7 -1 -1 171.38 15.1
 -7 -1 -1 195.38 12.6
 -7 -1 -1 179.98 13.7
 -7 -1 -1 205.38 14.7
 -7 -1 -1 177.98 12.5
 -7 -1 -1 192.28 13
 -7 -1 -1 180.88 12.5
 -7 -1 -1 202.98 13.1
 8 1 1 70.09 9.5
 8 1 1 59.39 9.4
 8 1 1 32.4 6.7
 8 1 1 58.69 8.7
 8 1 1 53.29 10
 8 1 1 44 6.6
 8 1 1 50.59 4.7
 8 1 1 60.29 9.4
 8 1 1 55.89 9.5
 8 1 1 58.39 10.1
 -8 -1 -1 52.29 8.5
 -8 -1 -1 61.79 5.8
 -8 -1 -1 52.39 5.2
 -8 -1 -1 44.8 7.4
 -8 -1 -1 66.29 9.5
 -8 -1 -1 53.89 5
 -8 -1 -1 42.4 5.1
 -8 -1 -1 55.39 6.9
 -8 -1 -1 45 4.8
 -8 -1 -1 66.89 8.4
 9 1 1 46.2 9.6
 9 1 1 47.7 7.4
 9 1 1 51.49 10.7
 9 1 1 49.6 9
 9 1 1 46.9 9.6
 9 1 1 63.89 9.5
 9 1 1 60.49 11.1
 -9 -1 -1 45.6 8.8
 -9 -1 -1 55.29 6
 -9 -1 -1 48.2 5.7
 -9 -1 -1 47.2 7.6
 -9 -1 -1 56.89 6.1
 -9 -1 -1 51.09 6.4
 -9 -1 -1 51.09 5.8
 -9 -1 -1 56.69 9
 -9 -1 -1 49.7 7.3
 -9 -1 -1 41.8 7.3
 10 1 1 167.38 17.7
 10 1 1 182.78 16.8
 10 1 1 170.18 17.6
 10 1 1 182.18 18.9
 10 1 1 177.68 14.8
 10 1 1 175.78 16.5
 10 1 1 193.78 18.2
 -10 -1 -1 161.08 12.6
 -10 -1 -1 177.28 15.4
 -10 -1 -1 181.88 12.8
 -10 -1 -1 161.18 14
 -10 -1 -1 164.68 12.6
 -10 -1 -1 179.08 15.9
 -10 -1 -1 186.28 13.7
 -10 -1 -1 214.68 17.6
 -10 -1 -1 150.38 16.1
 11 1 1 53.09 11.5
 11 1 1 57.89 11.7
 11 1 1 66.89 9.7
 11 1 1 75.49 14.4
 11 1 1 55.49 10.5
 11 1 1 49.7 10.5
 -11 -1 -1 55.09 9.3
 -11 -1 -1 60.09 8.4
 -11 -1 -1 51.99 9.8
 -11 -1 -1 58.59 7.8
 -11 -1 -1 65.39 7.4
 -11 -1 -1 57.39 7
 -11 -1 -1 54.49 10.4
 12 1 1 -2.2 4.7
 12 1 1 1.2 6.2
 12 1 1 2.6 6.3
 12 1 1 -1.1 4.1
 12 1 1 3.5 5
 12 1 1 -0.5 5.7
 -12 -1 -1 4.3 4.4
 -12 -1 -1 1.1 2.4
 -12 -1 -1 -0.7 4.6
 13 1 1 107.69 16.3
 13 1 1 97.79 16.4
 13 1 1 74.49 15.5
 13 1 1 97.19 17.2
 13 1 1 130.89 17.6
 -13 -1 -1 93.89 9.3
 -13 -1 -1 82.79 14.7
 -13 -1 -1 90.79 13.4
 14 1 1 94.59 15.2
 14 1 1 96.29 16.9
 14 1 1 86.69 17.4
 14 1 1 102.39 18.3
 -14 -1 -1 106.69 15
 -14 -1 -1 97.29 16.3
 -14 -1 -1 82.49 10
 -13 2 2 23 5.8
 -13 2 2 22 8.6
 -13 2 2 23.6 5.9
 -13 2 2 22.6 8.4
 13 -2 -2 21.5 11
 13 -2 -2 19.1 10
 13 -2 -2 22.7 7.9
 13 -2 -2 22.3 11.2
 -12 2 2 -0.5 4.7
 -12 2 2 6.6 6
 -12 2 2 -0.2 2.8
 -12 2 2 5.3 3.5
 12 -2 -2 -2.3 7.3
 12 -2 -2 -2.9 5.7
 12 -2 -2 2 7.4
 12 -2 -2 4.4 5.6
 -11 2 2 55.49 11
 -11 2 2 42.1 7.2
 -11 2 2 51.89 7.9
 -11 2 2 48 9.7
 -11 2 2 48.4 8.6
 11 -2 -2 33.6 10.5
 11 -2 -2 68.99 12.3
 11 -2 -2 55.69 12.4
 11 -2 -2 54.79 13.6
 11 -2 -2 59.89 10.2
 -10 2 2 26.7 5.7
 -10 2 2 19.4 6.4
 -10 2 2 7.2 7.9
 -10 2 2 14.5 4.3
 -10 2 2 9 4.6
 -10 2 2 11.4 6.4
 10 -2 -2 10.5 6.5
 10 -2 -2 1.4 6.9
 10 -2 -2 14.5 7.3
 10 -2 -2 12.6 5.4
 10 -2 -2 18 6.9
 -9 2 2 31.6 8.5
 -9 2 2 31.6 6.5
 -9 2 2 30 6.2
 -9 2 2 42.9 8.1
 -9 2 2 39 6.2
 -9 2 2 41.6 9.2
 -9 2 2 45.8 5
 -9 2 2 32.2 5.9
 9 -2 -2 32.8 8.8
 9 -2 -2 31.2 5.5
 9 -2 -2 39.5 8.1
 9 -2 -2 37.1 9.2
 9 -2 -2 28.5 9
 9 -2 -2 29.4 7.2
 -8 2 2 38.4 5.8
 -8 2 2 37.1 8.1
 -8 2 2 43.4 6.9
 -8 2 2 31 4.3
 -8 2 2 41.8 6.4
 -8 2 2 21.9 5.7
 -8 2 2 36.5 6.8
 -8 2 2 33.6 5.6
 -8 2 2 31.6 7.3
 8 -2 -2 36.2 5.7
 8 -2 -2 39.9 5.7
 8 -2 -2 36.1 7.8
 8 -2 -2 43.4 7.9
 8 -2 -2 38.8 4.7
 8 -2 -2 29.7 7.7
 8 -2 -2 47.2 9.8
 8 -2 -2 37.2 7.4
 8 -2 -2 36.9 9.4
 -7 2 2 76.59 10.3
 -7 2 2 100.79 12.7
 -7 2 2 88.19 8.7
 -7 2 2 86.79 6.9
 -7 2 2 85.59 8.6
 -7 2 2 82.39 10.2
 -7 2 2 87.29 8
 -7 2 2 84.19 7.9
 -7 2 2 85.69 8
 7 -2 -2 66.29 10.7
 7 -2 -2 81.79 11.4
 7 -2 -2 86.89 11.8
 7 -2 -2 94.09 14
 7 -2 -2 83.29 6.7
 7 -2 -2 87.19 10.8
 7 -2 -2 66.39 7.3
 7 -2 -2 85.29 7.8
 7 -2 -2 83.39 10.3
 -6 2 2 172.18 13.8
 -6 2 2 182.58 13.9
 -6 2 2 184.18 12.1
 -6 2 2 190.68 13.7
 -6 2 2 174.98 13.1
 -6 2 2 170.88 15.3
 -6 2 2 178.88 13.3
 -6 2 2 193.58 14.7
 -6 2 2 172.28 15.1
 -6 2 2 179.68 13.2
 6 -2 -2 173.68 12.8
 6 -2 -2 190.98 14
 6 -2 -2 201.28 17.3
 6 -2 -2 189.48 15.3
 6 -2 -2 165.38 14.2
 6 -2 -2 150.78 15.2
 6 -2 -2 170.58 14.3
 6 -2 -2 177.58 14.8
 6 -2 -2 178.28 13.1
 6 -2 -2 176.98 12
 -5 2 2 277.87 17.4
 -5 2 2 263.27 19.3
 -5 2 2 287.57 18.8
 -5 2 2 254.97 18.7
 -5 2 2 286.97 19
 -5 2 2 284.27 18.4
 -5 2 2 257.77 19.9
 -5 2 2 261.57 20.1
 -5 2 2 270.17 18.3
 -5 2 2 278.97 18.5
 5 -2 -2 293.17 21.9
 5 -2 -2 278.17 19.6
 5 -2 -2 284.37 19.6
 5 -2 -2 274.27 19.5
 5 -2 -2 269.07 18
 5 -2 -2 256.57 19.4
 5 -2 -2 224.38 19.8
 5 -2 -2 267.67 18.4
 5 -2 -2 265.37 17.2
 5 -2 -2 301.37 20.1
 5 -2 -2 275.07 18.9
 -4 2 2 4512.75 249.38
 -4 2 2 4243.88 250.67
 -4 2 2 4316.97 250.47
 -4 2 2 4351.46 249.08
 -4 2 2 4405.66 249.28
 -4 2 2 4242.98 249.08
 -4 2 2 4072.79 249.78
 -4 2 2 4224.08 249.18
 -4 2 2 4371.86 249.58
 -4 2 2 4390.26 248.18
 4 -2 -2 4138.79 249.88
 4 -2 -2 4430.36 250.17
 4 -2 -2 4172.18 249.78
 4 -2 -2 3866.31 250.47
 4 -2 -2 4305.97 249.28
 4 -2 -2 3724.93 249.68
 4 -2 -2 4242.78 249.18
 4 -2 -2 4108.09 248.08
 4 -2 -2 4477.75 249.58
 4 -2 -2 4225.98 249.28
 4 -2 -2 4129.99 248.78
 4 -2 -2 3914.71 251.47
 -3 2 2 29.8 2.8
 -3 2 2 14.1 3.5
 -3 2 2 28.7 4.8
 -3 2 2 20.3 3.5
 -3 2 2 23.2 3
 -3 2 2 27 3.7
 -3 2 2 27.2 4.2
 -3 2 2 24.9 4.5
 -3 2 2 25.3 3.9
 -3 2 2 27 3.9
 -3 2 2 22 3.6
 3 -2 -2 19.3 3.3
 3 -2 -2 31.7 6.3
 3 -2 -2 26.2 3
 3 -2 -2 25.3 4.3
 3 -2 -2 23.3 3.4
 3 -2 -2 23 4.5
 3 -2 -2 28.7 4.3
 3 -2 -2 30 4.6
 3 -2 -2 17.4 3.6
 3 -2 -2 25.7 3.9
 3 -2 -2 22.2 3.7
 -2 2 2 7.9 2.7
 -2 2 2 6.4 2.1
 -2 2 2 3.6 2
 -2 2 2 5 2
 -2 2 2 8.7 2.4
 -2 2 2 7.9 1.8
 -2 2 2 3.6 2.2
 -2 2 2 3.3 1.9
 -2 2 2 6.3 2.4
 -2 2 2 5.2 1.9
 -2 2 2 6.2 2.4
 2 -2 -2 4.4 1.9
 2 -2 -2 3.1 2
 2 -2 -2 6.9 2.4
 2 -2 -2 2.5 1.3
 2 -2 -2 6 2.4
 2 -2 -2 5.3 2.5
 2 -2 -2 3 2.2
 2 -2 -2 7 2.5
 2 -2 -2 4.7 2.2
 2 -2 -2 4.5 2.3
 2 -2 -2 9.3 2.5
 2 -2 -2 5.1 1.9
 2 -2 -2 6.2 1.8
 -1 2 2 10.8 2.2
 -1 2 2 7.3 2.2
 -1 2 2 10.1 2.6
 -1 2 2 8.3 2.1
 -1 2 2 7.6 2
 -1 2 2 9.8 2.3
 -1 2 2 3.9 1.7
 -1 2 2 10.2 2.3
 -1 2 2 11.3 2.6
 -1 2 2 10.4 2
 -1 2 2 9.9 2.1
 1 -2 -2 8.3 2.1
 1 -2 -2 11.4 2.8
 1 -2 -2 9.6 2.5
 1 -2 -2 7.7 2
 1 -2 -2 11.1 2.6
 1 -2 -2 8.9 2.2
 1 -2 -2 8.1 2.2
 1 -2 -2 9.9 2.4
 1 -2 -2 10.7 2.4
 1 -2 -2 11.6 2.2
 1 -2 -2 4.9 1.8
 0 2 2 150.98 10
 0 2 2 147.69 10.2
 0 2 2 144.99 11.4
 0 2 2 165.18 9.6
 0 2 2 133.09 10.4
 0 2 2 162.98 10.4
 0 2 2 152.68 9.8
 0 2 2 150.58 10.4
 0 2 2 155.28 10.6
 0 2 2 159.18 10.4
 0 2 2 160.78 9.7
 0 2 2 153.48 10.3
 0 -2 -2 159.68 10.6
 0 -2 -2 150.68 11.3
 0 -2 -2 171.68 10.4
 0 -2 -2 151.28 10.3
 0 -2 -2 137.59 9.9
 0 -2 -2 145.89 10.3
 0 -2 -2 144.89 10.4
 0 -2 -2 155.58 9.7
 0 -2 -2 154.68 10.4
 0 -2 -2 144.39 9.8
 1 2 2 2446.56 138.79
 1 2 2 2459.25 137.59
 1 2 2 2308.37 138.59
 1 2 2 2383.86 138.19
 1 2 2 1963 137.89
 1 2 2 2203.88 138.59
 1 2 2 2290.67 138.19
 1 2 2 2343.37 138.09
 1 2 2 2470.15 137.79
 -1 -2 -2 2384.06 138.29
 -1 -2 -2 2601.24 137.39
 -1 -2 -2 2570.74 137.49
 -1 -2 -2 2356.46 138.19
 -1 -2 -2 2515.85 137.59
 -1 -2 -2 2001.5 139.99
 -1 -2 -2 2208.18 137.89
 -1 -2 -2 2261.87 138.09
 -1 -2 -2 2333.37 138.19
 -1 -2 -2 2418.26 137.69
 -1 -2 -2 2321.07 138.59
 2 2 2 981.5 65.19
 2 2 2 1138.99 65.79
 2 2 2 1045.4 64.09
 2 2 2 1089.19 64.29
 2 2 2 1103.09 64.29
 2 2 2 1106.39 64.29
 2 2 2 1134.89 64.09
 2 2 2 1137.59 64.59
 2 2 2 1040 64.99
 2 2 2 1060.29 63.89
 -2 -2 -2 1124.39 64.39
 -2 -2 -2 1126.79 64.29
 -2 -2 -2 1071.39 64.29
 -2 -2 -2 981.8 65.19
 -2 -2 -2 1125.89 64.29
 -2 -2 -2 1051.99 64.19
 3 2 2 5.4 2.3
 3 2 2 9.3 2.7
 3 2 2 6.3 2.3
 3 2 2 3.3 1.7
 3 2 2 1.4 2
 3 2 2 8.2 2
 3 2 2 6.9 3.3
 -3 -2 -2 5.1 2.4
 -3 -2 -2 4.8 1.8
 -3 -2 -2 6.4 1.7
 -3 -2 -2 6.4 2
 -3 -2 -2 6.5 1.5
 -3 -2 -2 4.2 1.9
 4 2 2 84.19 7.3
 4 2 2 84.39 6.8
 4 2 2 92.89 10.2
 4 2 2 81.59 7.2
 4 2 2 84.59 6.6
 4 2 2 76.59 7.7
 4 2 2 76.59 6.4
 -4 -2 -2 68.19 6.7
 -4 -2 -2 72.69 6.6
 -4 -2 -2 70.79 5.4
 -4 -2 -2 74.59 5.2
 -4 -2 -2 66.19 6.1
 -4 -2 -2 75.99 6.4
 5 2 2 45.8 6.4
 5 2 2 53.29 6
 5 2 2 32.2 5.8
 5 2 2 44.9 4.7
 5 2 2 56.59 5.9
 5 2 2 50.29 7.1
 5 2 2 57.39 8
 5 2 2 39.4 5.3
 5 2 2 43.2 5.7
 -5 -2 -2 38.7 4.9
 -5 -2 -2 38.1 5
 -5 -2 -2 31.3 3.4
 -5 -2 -2 38.5 5.6
 -5 -2 -2 40.4 6
 -5 -2 -2 37.3 3.2
 6 2 2 164.28 12.1
 6 2 2 152.18 13.1
 6 2 2 157.08 11.3
 6 2 2 135.09 12.3
 6 2 2 150.28 12.9
 6 2 2 156.08 12.9
 6 2 2 156.98 12.1
 6 2 2 140.39 12.2
 6 2 2 154.68 11
 6 2 2 161.38 12.8
 6 2 2 162.18 14.3
 -6 -2 -2 159.78 9.9
 -6 -2 -2 132.19 11.5
 -6 -2 -2 146.49 10.1
 -6 -2 -2 164.98 11.9
 -6 -2 -2 155.78 12.4
 -6 -2 -2 139.09 12.2
 7 2 2 474.35 29.2
 7 2 2 410.46 29.7
 7 2 2 457.95 29.1
 7 2 2 432.86 30.2
 7 2 2 391.76 29.4
 7 2 2 440.66 31.4
 7 2 2 453.95 27.9
 7 2 2 450.95 30
 7 2 2 443.46 30.6
 7 2 2 413.66 27.5
 7 2 2 426.16 29.4
 -7 -2 -2 384.66 28.3
 -7 -2 -2 395.06 29.2
 -7 -2 -2 447.06 28.7
 -7 -2 -2 451.35 26.5
 -7 -2 -2 437.26 28
 -7 -2 -2 450.65 27.6
 -7 -2 -2 412.86 26.7
 -7 -2 -2 428.06 29.3
 8 2 2 24.9 4.2
 8 2 2 34.7 5.3
 8 2 2 44.6 7.4
 8 2 2 34.6 8.6
 8 2 2 32.2 7.7
 8 2 2 44.3 8.1
 8 2 2 50.19 9
 8 2 2 42.3 7.2
 8 2 2 37.3 7.9
 -8 -2 -2 35.5 6.2
 -8 -2 -2 34.4 6.7
 -8 -2 -2 33.5 4.4
 -8 -2 -2 34 4
 -8 -2 -2 36.7 6.9
 -8 -2 -2 40.8 5.9
 -8 -2 -2 38.4 6.3
 -8 -2 -2 29.9 4.6
 9 2 2 1096.89 72.29
 9 2 2 1183.78 72.29
 9 2 2 1110.09 72.99
 9 2 2 1100.59 69.09
 9 2 2 1205.88 73.99
 9 2 2 1174.18 75.09
 9 2 2 1165.28 70.49
 9 2 2 1186.28 74.09
 9 2 2 1110.99 73.39
 -9 -2 -2 1168.98 69.49
 -9 -2 -2 1168.78 69.09
 -9 -2 -2 1165.58 72.79
 -9 -2 -2 1090.39 68.59
 -9 -2 -2 1039.5 71.09
 -9 -2 -2 1160.48 72.69
 -9 -2 -2 1144.89 71.49
 -9 -2 -2 1197.88 70.59
 10 2 2 17.5 6.7
 10 2 2 11.5 6.4
 10 2 2 10.7 4.9
 10 2 2 18.5 7.5
 10 2 2 10.6 4.1
 10 2 2 16.2 7.3
 10 2 2 14.4 6.5
 -10 -2 -2 10 5.5
 -10 -2 -2 9.9 4.7
 -10 -2 -2 12 4.2
 -10 -2 -2 18.8 6.1
 -10 -2 -2 17.7 3.9
 -10 -2 -2 11.4 4.8
 -10 -2 -2 10.9 3.4
 -10 -2 -2 7.9 2.6
 11 2 2 15.4 7.1
 11 2 2 20.3 7.8
 11 2 2 17 7
 11 2 2 10.1 7.3
 11 2 2 16.2 6.5
 -11 -2 -2 13.9 5.9
 -11 -2 -2 27.5 6.6
 -11 -2 -2 24.6 5.4
 -11 -2 -2 24.3 4.1
 -11 -2 -2 20.3 4.3
 -11 -2 -2 15.9 6.3
 12 2 2 127.79 17.8
 12 2 2 186.98 18
 12 2 2 168.18 21.6
 12 2 2 201.28 24.8
 12 2 2 155.08 20.4
 -12 -2 -2 179.28 17.6
 -12 -2 -2 153.68 12.5
 -12 -2 -2 188.88 14.1
 -12 -2 -2 161.28 17.7
 -12 -2 -2 165.98 16
 13 2 2 7.9 5.6
 13 2 2 -5.7 5.3
 13 2 2 3.9 6.6
 13 2 2 12.9 7.6
 13 2 2 0.4 5.1
 -13 -2 -2 1.8 4.7
 -13 -2 -2 1.4 2.6
 -13 -2 -2 1.9 4.8
 14 2 2 5.8 6.2
 14 2 2 4.6 6.7
 14 2 2 -0.8 7.7
 14 2 2 9.4 7.1
 14 2 2 4.9 7.2
 -14 -2 -2 0.7 5.5
 -14 -2 -2 4.3 3.1
 -14 -2 -2 2.3 4.9
 -13 3 3 32.3 9.4
 -13 3 3 11.8 5.5
 -13 3 3 16.6 6.7
 -13 3 3 26.7 6.4
 13 -3 -3 27.5 9.1
 13 -3 -3 36.7 12.1
 13 -3 -3 13.6 10.6
 -12 3 3 26.1 6.7
 -12 3 3 36.6 9.3
 -12 3 3 34.5 10
 -12 3 3 35.7 7.3
 12 -3 -3 35.9 11.2
 12 -3 -3 21.1 11.9
 12 -3 -3 35.6 9
 12 -3 -3 28.6 9.5
 -11 3 3 41.3 8.7
 -11 3 3 36.2 7.3
 -11 3 3 27.1 8
 -11 3 3 32.8 6.8
 -11 3 3 18.4 6.2
 11 -3 -3 32.9 8.5
 11 -3 -3 38.8 10.4
 11 -3 -3 33.5 12.4
 11 -3 -3 24.8 9.8
 -10 3 3 20.9 6.7
 -10 3 3 25.6 6.3
 -10 3 3 14.5 4.4
 -10 3 3 13.7 4.6
 -10 3 3 18 8.1
 10 -3 -3 26.7 7.6
 10 -3 -3 29.4 8
 10 -3 -3 21.6 7.9
 10 -3 -3 18.3 9.5
 10 -3 -3 19.2 8.3
 -9 3 3 26.2 5.8
 -9 3 3 31.8 6.5
 -9 3 3 28 5.8
 -9 3 3 16.1 6.4
 -9 3 3 21.4 6.1
 -9 3 3 36.3 9.3
 9 -3 -3 41.7 10.8
 9 -3 -3 24.3 7.1
 9 -3 -3 19.4 7.4
 9 -3 -3 24.4 5.5
 9 -3 -3 37.8 9.9
 9 -3 -3 34.3 7.7
 9 -3 -3 24 3.9
 -8 3 3 0.1 2.6
 -8 3 3 2.8 3.2
 -8 3 3 -2.4 2.3
 -8 3 3 -1.7 3.3
 -8 3 3 -0.4 3.9
 -8 3 3 5.1 4.3
 -8 3 3 -1.8 3.3
 -8 3 3 0.9 3.6
 8 -3 -3 -0.1 4.2
 8 -3 -3 -1.5 1.4
 8 -3 -3 -3.3 2
 8 -3 -3 -4.9 3.8
 8 -3 -3 -0.1 5.7
 8 -3 -3 6.4 4.8
 8 -3 -3 -0.2 2.6
 8 -3 -3 2.8 4.4
 8 -3 -3 -4.2 2.7
 -7 3 3 2.2 3.4
 -7 3 3 2.9 3.6
 -7 3 3 0.2 3.6
 -7 3 3 0.5 2.7
 -7 3 3 -2.8 2.1
 -7 3 3 2.5 2.7
 -7 3 3 -0.2 4.2
 -7 3 3 -2.6 2.1
 7 -3 -3 2.3 3.6
 7 -3 -3 1.6 3.2
 7 -3 -3 0.8 2.7
 7 -3 -3 6 4
 7 -3 -3 5.3 6
 7 -3 -3 -1.5 2.2
 7 -3 -3 -1.6 3.8
 7 -3 -3 1.6 1.8
 7 -3 -3 -1.5 3.7
 -6 3 3 118.39 10.8
 -6 3 3 133.49 11.4
 -6 3 3 115.19 10.9
 -6 3 3 123.49 11.7
 -6 3 3 125.59 11.6
 -6 3 3 130.19 12.9
 -6 3 3 136.99 11.3
 -6 3 3 142.19 13.3
 -6 3 3 142.89 11.3
 6 -3 -3 129.69 10.6
 6 -3 -3 146.89 12.3
 6 -3 -3 124.79 11.1
 6 -3 -3 120.19 12.1
 6 -3 -3 142.19 14.9
 6 -3 -3 125.69 12.4
 6 -3 -3 125.89 9.5
 6 -3 -3 147.59 13.1
 6 -3 -3 128.89 13.2
 -5 3 3 462.45 28
 -5 3 3 468.35 29.8
 -5 3 3 412.16 28.5
 -5 3 3 424.26 28
 -5 3 3 420.86 27.8
 -5 3 3 431.56 28.5
 -5 3 3 430.66 29.6
 -5 3 3 404.46 27.8
 -5 3 3 437.36 27.9
 5 -3 -3 385.66 27.3
 5 -3 -3 390.46 29.6
 5 -3 -3 392.26 27.7
 5 -3 -3 431.56 31.3
 5 -3 -3 397.66 28.6
 5 -3 -3 459.95 29.9
 5 -3 -3 393.56 28.5
 5 -3 -3 426.76 26.5
 5 -3 -3 432.16 28.5
 -4 3 3 46.7 7
 -4 3 3 48.9 6
 -4 3 3 48.3 6.2
 -4 3 3 45.6 6.4
 -4 3 3 42 4
 -4 3 3 49.8 6.1
 -4 3 3 47 6.2
 -4 3 3 47.2 5.6
 -4 3 3 51.69 7
 -4 3 3 41.9 6.2
 4 -3 -3 43.5 6.5
 4 -3 -3 39.1 5.5
 4 -3 -3 52.59 8.8
 4 -3 -3 55.99 4.9
 4 -3 -3 38.7 5.4
 4 -3 -3 47 6.2
 4 -3 -3 45 6.4
 4 -3 -3 41.8 6.1
 4 -3 -3 45.8 6
 4 -3 -3 35.9 6.5
 -3 3 3 16.8 3.7
 -3 3 3 18.6 3.8
 -3 3 3 10.8 2.9
 -3 3 3 15.4 3.4
 -3 3 3 13.5 3.5
 -3 3 3 18.4 3.7
 -3 3 3 18 4.1
 -3 3 3 18.7 3
 -3 3 3 19.4 3.3
 -3 3 3 19.6 4.4
 -3 3 3 11.8 3.1
 3 -3 -3 18.2 4
 3 -3 -3 19.2 4.5
 3 -3 -3 23.1 4.2
 3 -3 -3 17 3.4
 3 -3 -3 13.3 2.9
 3 -3 -3 11.1 3
 3 -3 -3 13.2 3.3
 3 -3 -3 19.4 4
 3 -3 -3 11.7 3.7
 3 -3 -3 19.7 4.2
 3 -3 -3 15.4 2.2
 3 -3 -3 16.2 4.1
 3 -3 -3 21.7 6.2
 3 -3 -3 12.9 3.4
 3 -3 -3 13.6 2.8
 -2 3 3 47 5.3
 -2 3 3 52.89 5
 -2 3 3 45.8 5.5
 -2 3 3 46.6 6
 -2 3 3 49.7 5.9
 -2 3 3 42.6 5.7
 -2 3 3 38.3 5.2
 -2 3 3 39.6 4.7
 -2 3 3 43 5
 -2 3 3 42.8 5
 -2 3 3 35.8 4.9
 2 -3 -3 37 5.3
 2 -3 -3 52.19 5
 2 -3 -3 37.2 4.8
 2 -3 -3 52.69 5.7
 2 -3 -3 50.59 7.3
 2 -3 -3 41 4.6
 2 -3 -3 39.6 5.4
 2 -3 -3 40.8 5.7
 2 -3 -3 41.6 4.9
 2 -3 -3 42.8 5.5
 2 -3 -3 51.89 6.3
 2 -3 -3 39 5.6
 2 -3 -3 46 5.3
 -1 3 3 26 3.7
 -1 3 3 32.4 4.4
 -1 3 3 27.2 3.4
 -1 3 3 28.9 3.9
 -1 3 3 34.5 4.6
 -1 3 3 30.8 4.5
 -1 3 3 29.5 3.9
 -1 3 3 27.8 4.1
 -1 3 3 27.9 3.9
 -1 3 3 28.9 4.5
 -1 3 3 28.7 4.9
 1 -3 -3 25.4 3.7
 1 -3 -3 25.5 4.2
 1 -3 -3 30.4 4.4
 1 -3 -3 27.8 4
 1 -3 -3 24.1 3.6
 1 -3 -3 32.8 4.8
 1 -3 -3 31.8 4.8
 1 -3 -3 20.1 3.6
 1 -3 -3 29.8 4.2
 1 -3 -3 24.5 3.5
 1 -3 -3 35.6 4.6
 0 3 3 618.74 35.7
 0 3 3 588.84 35.1
 0 3 3 618.34 34.9
 0 3 3 614.54 34.6
 0 3 3 549.74 37.3
 0 3 3 577.14 35.5
 0 3 3 571.44 35.8
 0 3 3 496.75 35.7
 0 3 3 615.14 34.6
 0 3 3 580.64 35.8
 0 3 3 574.44 35.5
 0 3 3 586.14 35.6
 0 -3 -3 523.85 35
 0 -3 -3 638.14 35.7
 0 -3 -3 555.64 34.7
 0 -3 -3 534.05 35.7
 0 -3 -3 545.65 35.5
 0 -3 -3 574.14 35.5
 0 -3 -3 614.64 37.3
 0 -3 -3 556.64 35.8
 0 -3 -3 568.74 35.6
 0 -3 -3 531.25 34.9
 1 3 3 688.33 38.1
 1 3 3 589.94 37.2
 1 3 3 571.64 37.3
 1 3 3 572.94 37.6
 1 3 3 667.53 36.3
 1 3 3 667.83 36.1
 1 3 3 621.84 36.5
 1 3 3 612.34 37.3
 1 3 3 636.94 36.2
 1 3 3 581.94 37.8
 -1 -3 -3 614.94 36.4
 -1 -3 -3 609.34 36.9
 -1 -3 -3 578.54 37.5
 -1 -3 -3 610.94 36.3
 -1 -3 -3 623.44 36.1
 -1 -3 -3 498.15 37.9
 -1 -3 -3 628.44 37.4
 -1 -3 -3 619.84 36.2
 -1 -3 -3 554.84 39.7
 -1 -3 -3 596.64 37.3
 -1 -3 -3 577.84 37.2
 -1 -3 -3 602.04 37.6
 2 3 3 617.64 36.9
 2 3 3 624.54 37.2
 2 3 3 576.54 38.3
 2 3 3 642.14 38.9
 2 3 3 630.24 37.6
 2 3 3 518.45 38.2
 2 3 3 623.34 37.6
 2 3 3 637.34 38.6
 2 3 3 661.43 38
 2 3 3 633.44 37.6
 2 3 3 625.94 37.4
 2 3 3 630.84 37.2
 -2 -3 -3 592.94 37.5
 -2 -3 -3 613.54 37.7
 -2 -3 -3 538.55 41
 -2 -3 -3 647.24 36.8
 -2 -3 -3 608.94 37.5
 -2 -3 -3 590.24 38.5
 -2 -3 -3 644.94 36.4
 -2 -3 -3 618.04 37.1
 3 3 3 126.99 9.2
 3 3 3 142.49 11.1
 3 3 3 129.19 9.3
 3 3 3 149.59 10.4
 3 3 3 126.59 10.4
 3 3 3 124.49 8.6
 3 3 3 136.29 11.2
 3 3 3 130.69 9.1
 3 3 3 121.99 10.6
 3 3 3 137.49 8.9
 3 3 3 143.49 9.8
 3 3 3 128.39 10.1
 3 3 3 133.59 9.2
 -3 -3 -3 111.99 10.5
 -3 -3 -3 144.19 9.6
 -3 -3 -3 144.69 9.6
 -3 -3 -3 126.79 9.2
 -3 -3 -3 109.39 12.9
 -3 -3 -3 137.49 9.2
 -3 -3 -3 133.89 9.4
 -3 -3 -3 141.49 9.4
 4 3 3 925.71 52.69
 4 3 3 854.11 52.49
 4 3 3 854.21 51.69
 4 3 3 828.32 53.59
 4 3 3 843.72 53.29
 4 3 3 852.61 52.29
 4 3 3 854.11 51.49
 -4 -3 -3 833.92 50.89
 -4 -3 -3 854.41 51.39
 -4 -3 -3 761.92 52.99
 -4 -3 -3 815.02 51.29
 -4 -3 -3 876.21 50.99
 -4 -3 -3 833.22 50.99
 -4 -3 -3 874.21 51.59
 5 3 3 18.1 5.3
 5 3 3 22.5 4
 5 3 3 19.3 4.6
 5 3 3 19 5
 5 3 3 22.7 4
 5 3 3 13.5 3.8
 5 3 3 41.2 4.7
 5 3 3 26.6 4.7
 -5 -3 -3 19.8 3.8
 -5 -3 -3 18.8 4.8
 -5 -3 -3 25.2 4.1
 -5 -3 -3 21.3 3.6
 -5 -3 -3 22.8 3.1
 -5 -3 -3 28.1 4.4
 -5 -3 -3 22.2 3.1
 6 3 3 3.3 2.2
 6 3 3 1.6 2.6
 6 3 3 0.1 3.2
 6 3 3 2.2 3.2
 6 3 3 3.3 3
 6 3 3 1.8 2.3
 6 3 3 0.2 1.9
 6 3 3 0.8 2.1
 -6 -3 -3 4.3 2.1
 -6 -3 -3 0.7 1.9
 -6 -3 -3 0 2
 -6 -3 -3 2.7 1.4
 -6 -3 -3 2.2 1.4
 -6 -3 -3 0.1 2.1
 7 3 3 74.49 7.5
 7 3 3 79.49 8.8
 7 3 3 65.59 9.8
 7 3 3 63.69 7.2
 7 3 3 58.79 8.8
 7 3 3 68.49 9.2
 7 3 3 60.89 7.7
 7 3 3 61.59 10.6
 7 3 3 60.89 8
 -7 -3 -3 57.69 5.2
 -7 -3 -3 67.39 8
 -7 -3 -3 70.59 7.6
 -7 -3 -3 61.99 5.4
 -7 -3 -3 69.69 8.8
 -7 -3 -3 75.69 8.1
 8 3 3 209.78 15.8
 8 3 3 193.78 17.1
 8 3 3 200.98 17
 8 3 3 200.58 14.8
 8 3 3 197.28 15.7
 8 3 3 204.88 18.6
 8 3 3 186.58 17.4
 8 3 3 190.38 16
 8 3 3 198.88 16.1
 -8 -3 -3 199.58 15.2
 -8 -3 -3 198.18 16.1
 -8 -3 -3 216.78 14.9
 -8 -3 -3 204.68 14.5
 -8 -3 -3 186.58 13.2
 -8 -3 -3 185.58 15.8
 -8 -3 -3 200.58 15.4
 -8 -3 -3 186.68 13
 9 3 3 185.08 18.7
 9 3 3 219.58 18.4
 9 3 3 215.68 15.7
 9 3 3 215.28 17.1
 9 3 3 211.48 17.5
 9 3 3 219.68 17.3
 9 3 3 213.28 18.7
 9 3 3 222.38 20.7
 9 3 3 189.78 17.3
 -9 -3 -3 198.78 16.4
 -9 -3 -3 225.78 16.2
 -9 -3 -3 193.98 17.2
 -9 -3 -3 211.78 14.1
 -9 -3 -3 213.58 17.6
 -9 -3 -3 225.98 17
 -9 -3 -3 214.08 15.5
 -9 -3 -3 211.38 14.4
 10 3 3 134.59 13.6
 10 3 3 109.79 10.5
 10 3 3 136.19 13.6
 10 3 3 124.69 13.6
 10 3 3 149.49 19.5
 10 3 3 153.58 19
 10 3 3 127.99 16
 10 3 3 136.29 16.6
 -10 -3 -3 121.89 9.8
 -10 -3 -3 111.59 12
 -10 -3 -3 135.19 9.7
 -10 -3 -3 122.19 13.1
 -10 -3 -3 120.09 12.9
 -10 -3 -3 144.19 11.1
 -10 -3 -3 115.69 11.9
 -10 -3 -3 143.79 11.7
 11 3 3 286.37 25.4
 11 3 3 286.17 25.2
 11 3 3 320.27 24.9
 11 3 3 326.97 27.7
 11 3 3 305.57 24.3
 11 3 3 281.57 24.5
 -11 -3 -3 299.37 20.9
 -11 -3 -3 299.27 19.7
 -11 -3 -3 278.07 23.7
 -11 -3 -3 301.47 20.2
 -11 -3 -3 288.17 24
 -11 -3 -3 294.27 23.9
 -11 -3 -3 301.87 21.7
 -11 -3 -3 286.57 22.7
 12 3 3 45.7 12
 12 3 3 22 9.1
 12 3 3 22.6 8
 12 3 3 25.1 7.3
 12 3 3 9.2 6.6
 12 3 3 11.9 7.6
 -12 -3 -3 7.4 4.7
 -12 -3 -3 29.7 6.8
 -12 -3 -3 16.5 3.8
 -12 -3 -3 17.3 4.2
 -12 -3 -3 12.2 6.6
 13 3 3 -2.7 4.7
 13 3 3 -1.3 4.7
 13 3 3 1.8 5.6
 13 3 3 -6.6 5.4
 13 3 3 -1.4 5.7
 -13 -3 -3 2.6 4.3
 -13 -3 -3 -1.7 4.5
 -13 -3 -3 2.3 2.4
 14 3 3 1.4 6.4
 14 3 3 5.9 7.4
 14 3 3 6.6 7.2
 14 3 3 -7.9 5.5
 14 3 3 9.1 7.4
 -14 -3 -3 2.8 2.8
 -14 -3 -3 -3.3 4.1
 -14 -3 -3 1 5.7
 -12 4 4 44.9 8.5
 -12 4 4 30.1 8.6
 -12 4 4 32.5 9.1
 -12 4 4 30.4 7.2
 12 -4 -4 14.6 10
 12 -4 -4 40.3 13.9
 12 -4 -4 44 10.5
 -11 4 4 62.29 11.4
 -11 4 4 39.5 8.2
 -11 4 4 49.8 8.9
 -11 4 4 44.3 8.2
 11 -4 -4 42.4 10.2
 11 -4 -4 50.39 14
 11 -4 -4 61.09 13.9
 11 -4 -4 44.8 11.3
 -10 4 4 2.5 3.6
 -10 4 4 -1.9 4.1
 -10 4 4 1 4.7
 -10 4 4 3.1 3.8
 10 -4 -4 6.6 6.3
 10 -4 -4 5.4 6.6
 10 -4 -4 5.2 6.4
 10 -4 -4 -4.7 6.3
 -9 4 4 -2.6 3.4
 -9 4 4 -3.7 4.6
 -9 4 4 2.1 3.4
 -9 4 4 -0.1 4.1
 -9 4 4 -1.3 2.9
 9 -4 -4 2.4 6.3
 9 -4 -4 -2.6 3.5
 9 -4 -4 5.9 4.8
 9 -4 -4 -6.1 4.3
 9 -4 -4 2.4 5.8
 -8 4 4 42.8 9.4
 -8 4 4 26.3 7.1
 -8 4 4 35.4 8.5
 -8 4 4 40.1 6.9
 -8 4 4 45.8 7.5
 -8 4 4 37.3 7.3
 8 -4 -4 24.1 8.3
 8 -4 -4 30.2 10.3
 8 -4 -4 31.9 4.7
 8 -4 -4 32.5 6.3
 8 -4 -4 36 8.5
 8 -4 -4 28.7 7.1
 -7 4 4 8.6 4
 -7 4 4 6.8 3.5
 -7 4 4 2.6 3.9
 -7 4 4 -0.1 3.3
 -7 4 4 13.8 6
 -7 4 4 3.3 3.2
 -7 4 4 1.1 3.1
 -7 4 4 5.1 5
 7 -4 -4 2.6 6.1
 7 -4 -4 -1.5 2.6
 7 -4 -4 6.9 5.1
 7 -4 -4 8 4.8
 7 -4 -4 -0.5 4.5
 7 -4 -4 7.3 4.8
 7 -4 -4 3.1 4.3
 7 -4 -4 11.3 3
 7 -4 -4 0.8 3
 -6 4 4 5.5 3.6
 -6 4 4 13.1 4.2
 -6 4 4 4.5 3.9
 -6 4 4 8.9 5
 -6 4 4 13.4 4.2
 -6 4 4 11.2 3.9
 -6 4 4 7.2 3.5
 -6 4 4 2.6 3.9
 -6 4 4 14.6 4.6
 6 -4 -4 3.5 3.8
 6 -4 -4 18.7 5
 6 -4 -4 10.7 3.1
 6 -4 -4 11 6
 6 -4 -4 5.7 4.6
 6 -4 -4 12.1 4.9
 6 -4 -4 13.5 4.3
 6 -4 -4 17.7 4.5
 -5 4 4 59.89 8.8
 -5 4 4 49.99 7.6
 -5 4 4 78.39 9.4
 -5 4 4 72.69 7.5
 -5 4 4 59.99 5.3
 -5 4 4 57.49 7.7
 -5 4 4 70.69 8.9
 -5 4 4 66.59 8.2
 -5 4 4 71.89 8.3
 -5 4 4 68.99 8.7
 5 -4 -4 66.29 8.9
 5 -4 -4 48.8 8.8
 5 -4 -4 65.69 8.3
 5 -4 -4 67.49 11.1
 5 -4 -4 50.09 7.4
 5 -4 -4 54.89 6.3
 5 -4 -4 64.59 8.1
 5 -4 -4 60.79 8.9
 -4 4 4 58.99 7.5
 -4 4 4 59.49 7.4
 -4 4 4 46.7 7.2
 -4 4 4 62.39 8.3
 -4 4 4 73.39 8.5
 -4 4 4 62.09 5.6
 -4 4 4 67.69 7.9
 -4 4 4 47.9 6.6
 -4 4 4 57.69 8.2
 -4 4 4 68.49 7
 4 -4 -4 58.69 6.5
 4 -4 -4 54.59 6.8
 4 -4 -4 61.99 8.3
 4 -4 -4 67.59 8.4
 4 -4 -4 58.19 4.7
 4 -4 -4 69.69 8.3
 4 -4 -4 35 6.5
 4 -4 -4 56.59 10.1
 4 -4 -4 56.29 8.5
 4 -4 -4 57.99 7.2
 -3 4 4 54.89 6.8
 -3 4 4 59.19 7.4
 -3 4 4 40.8 6.7
 -3 4 4 45.3 6.5
 -3 4 4 62.99 7.9
 -3 4 4 51.19 6.8
 -3 4 4 69.79 6.7
 -3 4 4 71.99 7.5
 -3 4 4 64.99 6.1
 -3 4 4 67.49 6.7
 3 -4 -4 66.99 8.3
 3 -4 -4 63.89 7.7
 3 -4 -4 52.79 7.3
 3 -4 -4 63.19 6.7
 3 -4 -4 73.89 10.3
 3 -4 -4 48.2 7.3
 3 -4 -4 62.69 7.3
 3 -4 -4 51.49 6.8
 3 -4 -4 64.59 5.6
 3 -4 -4 65.29 7.8
 3 -4 -4 68.59 6.2
 3 -4 -4 73.29 7.1
 3 -4 -4 59.29 7.3
 -2 4 4 29.8 4.5
 -2 4 4 22 4.9
 -2 4 4 30.3 4.4
 -2 4 4 23.7 4.3
 -2 4 4 22.4 4
 -2 4 4 23.3 4.3
 -2 4 4 29.5 4.9
 -2 4 4 17.8 3.8
 -2 4 4 26 4.8
 -2 4 4 23.3 4.2
 -2 4 4 26.3 4.7
 2 -4 -4 19 3.7
 2 -4 -4 33.7 7
 2 -4 -4 22 4.4
 2 -4 -4 18.5 3.7
 2 -4 -4 21.7 4.6
 2 -4 -4 26.1 4
 2 -4 -4 21.7 4
 2 -4 -4 19.3 4.4
 2 -4 -4 19.9 4.2
 2 -4 -4 28.5 5.1
 2 -4 -4 27.9 4.7
 2 -4 -4 34.4 4.5
 2 -4 -4 31.2 5.5
 -1 4 4 354.36 22.5
 -1 4 4 293.07 23.1
 -1 4 4 345.17 23.4
 -1 4 4 342.87 25.1
 -1 4 4 362.66 23.5
 -1 4 4 325.87 23.5
 -1 4 4 356.06 23.5
 -1 4 4 383.66 23.6
 -1 4 4 365.16 23
 -1 4 4 393.86 23.6
 -1 4 4 315.17 22.6
 1 -4 -4 322.07 22.9
 1 -4 -4 363.56 23.7
 1 -4 -4 382.56 24.1
 1 -4 -4 379.46 23.4
 1 -4 -4 320.57 23.1
 1 -4 -4 333.87 22.6
 1 -4 -4 378.36 23.3
 1 -4 -4 390.06 23.6
 1 -4 -4 354.16 23.6
 1 -4 -4 352.36 23.4
 1 -4 -4 371.76 24.7
 0 4 4 417.56 32.5
 0 4 4 538.85 31.2
 0 4 4 534.55 31.9
 0 4 4 573.14 31.6
 0 4 4 515.55 32.5
 0 4 4 573.84 32.1
 0 4 4 462.55 34.5
 0 4 4 517.05 32.4
 0 4 4 525.15 31.1
 0 4 4 494.85 30.9
 0 4 4 502.75 32.5
 0 4 4 502.45 32.7
 0 4 4 506.75 32.4
 0 4 4 530.45 32.8
 0 -4 -4 552.64 32.5
 0 -4 -4 508.95 32.6
 0 -4 -4 512.35 32.8
 0 -4 -4 537.25 32.2
 0 -4 -4 488.25 32.3
 0 -4 -4 492.85 32.7
 0 -4 -4 548.65 34.7
 0 -4 -4 497.15 31.3
 0 -4 -4 453.45 31.7
 0 -4 -4 489.95 31.7
 0 -4 -4 482.55 32.4
 1 4 4 100.49 9.6
 1 4 4 130.69 9.5
 1 4 4 113.79 8.1
 1 4 4 118.89 9.3
 1 4 4 108.89 9.3
 1 4 4 129.69 7.8
 1 4 4 111.69 9
 1 4 4 118.09 7.8
 1 4 4 112.09 9.6
 1 4 4 99.79 11.7
 1 4 4 116.69 9.5
 1 4 4 124.39 8
 -1 -4 -4 127.19 9.7
 -1 -4 -4 111.99 9.3
 -1 -4 -4 118.49 8.2
 -1 -4 -4 122.19 9.4
 -1 -4 -4 112.99 9.7
 -1 -4 -4 108.99 7.8
 -1 -4 -4 122.69 8.1
 -1 -4 -4 101.99 11.5
 -1 -4 -4 108.49 10.2
 -1 -4 -4 125.49 9.7
 -1 -4 -4 114.19 8.8
 2 4 4 356.26 21
 2 4 4 295.37 22.7
 2 4 4 347.97 23.2
 2 4 4 366.96 22.2
 2 4 4 347.37 21.8
 2 4 4 342.67 22.9
 2 4 4 357.56 22.3
 2 4 4 316.67 22.9
 2 4 4 269.17 25.3
 2 4 4 352.16 22.2
 2 4 4 346.67 22
 2 4 4 337.97 21.3
 2 4 4 349.37 22.2
 -2 -4 -4 345.67 22.5
 -2 -4 -4 346.57 22.2
 -2 -4 -4 366.86 20.7
 -2 -4 -4 335.37 22.9
 -2 -4 -4 356.96 20.9
 -2 -4 -4 360.36 21.2
 -2 -4 -4 330.47 22.1
 -2 -4 -4 279.17 23.4
 -2 -4 -4 340.57 21.6
 -2 -4 -4 359.46 20.5
 -2 -4 -4 291.97 25.5
 3 4 4 135.29 10.4
 3 4 4 151.38 10.4
 3 4 4 145.59 10
 3 4 4 143.39 11.8
 3 4 4 142.69 11.8
 3 4 4 151.58 11.3
 3 4 4 140.39 10.6
 3 4 4 136.59 12.1
 3 4 4 147.79 10.2
 3 4 4 141.69 9.9
 3 4 4 117.69 11.4
 3 4 4 145.69 10.3
 -3 -4 -4 157.08 10.8
 -3 -4 -4 150.68 9.8
 -3 -4 -4 139.09 11.9
 -3 -4 -4 150.08 11
 -3 -4 -4 127.99 10.4
 -3 -4 -4 144.99 9
 -3 -4 -4 131.99 14.8
 -3 -4 -4 148.49 10.1
 4 4 4 15.1 3.1
 4 4 4 16.3 2.2
 4 4 4 13.2 3.9
 4 4 4 9.6 2.5
 4 4 4 15.6 3.8
 4 4 4 20 4.9
 4 4 4 16.4 3.1
 4 4 4 14.2 4.1
 4 4 4 13.4 2.5
 4 4 4 9.4 2.9
 4 4 4 14.7 2.8
 4 4 4 9.1 4.1
 4 4 4 17 3.9
 -4 -4 -4 11.9 3.1
 -4 -4 -4 12.3 2.9
 -4 -4 -4 12.3 2.6
 -4 -4 -4 15.4 3
 -4 -4 -4 10.5 3.6
 -4 -4 -4 21.1 3.6
 -4 -4 -4 9.7 2.8
 -4 -4 -4 13.9 3.2
 -4 -4 -4 13.9 5.7
 5 4 4 284.97 22.6
 5 4 4 305.17 21.8
 5 4 4 301.87 23.3
 5 4 4 308.57 21.1
 5 4 4 361.96 22.5
 5 4 4 337.57 21
 5 4 4 324.87 22.2
 -5 -4 -4 315.07 20.2
 -5 -4 -4 304.17 20.4
 -5 -4 -4 253.97 25.9
 -5 -4 -4 326.37 20.9
 -5 -4 -4 322.77 20.4
 -5 -4 -4 321.67 20.8
 -5 -4 -4 285.27 22.8
 -5 -4 -4 327.87 20.5
 6 4 4 244.68 17.6
 6 4 4 231.28 16.9
 6 4 4 232.08 16.2
 6 4 4 214.88 18.1
 6 4 4 207.28 17
 6 4 4 215.28 18.6
 6 4 4 233.48 16.3
 6 4 4 244.78 15.8
 6 4 4 248.88 16.5
 -6 -4 -4 214.68 15
 -6 -4 -4 231.48 16
 -6 -4 -4 209.58 18.2
 -6 -4 -4 222.98 15.9
 -6 -4 -4 226.18 16
 -6 -4 -4 200.18 15.1
 -6 -4 -4 236.58 15.2
 -6 -4 -4 177.28 21
 7 4 4 164.58 16.5
 7 4 4 180.88 14.3
 7 4 4 185.28 14
 7 4 4 201.88 13.9
 7 4 4 176.08 15.3
 7 4 4 181.08 15.1
 7 4 4 176.58 14
 7 4 4 175.88 14.1
 7 4 4 177.08 16.1
 -7 -4 -4 145.59 19.3
 -7 -4 -4 182.98 12.4
 -7 -4 -4 164.88 13
 -7 -4 -4 184.78 14.2
 -7 -4 -4 170.88 13.7
 -7 -4 -4 175.38 12.4
 -7 -4 -4 173.98 13.6
 -7 -4 -4 177.78 16.5
 8 4 4 121.09 11.5
 8 4 4 133.09 13
 8 4 4 129.79 13.7
 8 4 4 142.39 11.6
 8 4 4 144.69 15.2
 8 4 4 143.29 13.6
 8 4 4 141.89 11.9
 8 4 4 141.49 12
 8 4 4 125.19 11.9
 -8 -4 -4 95.49 10.4
 -8 -4 -4 140.19 9.9
 -8 -4 -4 125.09 11.8
 -8 -4 -4 150.28 12.4
 -8 -4 -4 131.69 14.3
 -8 -4 -4 136.39 11.6
 -8 -4 -4 129.39 9.7
 9 4 4 166.08 14.4
 9 4 4 173.28 14.6
 9 4 4 164.78 15.9
 9 4 4 188.78 15.2
 9 4 4 165.98 14.6
 9 4 4 206.28 18.9
 9 4 4 174.18 16.1
 9 4 4 148.49 16.5
 9 4 4 178.58 14.1
 -9 -4 -4 167.88 12.1
 -9 -4 -4 163.18 13.7
 -9 -4 -4 168.88 14.7
 -9 -4 -4 185.58 14.7
 -9 -4 -4 172.98 13.6
 -9 -4 -4 143.19 16.8
 -9 -4 -4 172.88 12.2
 -9 -4 -4 168.28 15
 10 4 4 137.39 17.2
 10 4 4 140.29 13.8
 10 4 4 152.18 14.3
 10 4 4 137.59 14.9
 10 4 4 149.88 14.4
 10 4 4 147.09 14.2
 10 4 4 168.38 13.3
 10 4 4 160.48 16.8
 10 4 4 154.68 20.3
 -10 -4 -4 145.49 13.7
 -10 -4 -4 146.19 12.6
 -10 -4 -4 139.89 13
 -10 -4 -4 155.28 11.1
 -10 -4 -4 156.78 14.4
 -10 -4 -4 156.58 11.3
 -10 -4 -4 167.58 15
 -10 -4 -4 157.88 13
 11 4 4 9.4 4.1
 11 4 4 7.6 7.1
 11 4 4 10.2 5.6
 11 4 4 6.7 5.1
 11 4 4 14.3 7.9
 11 4 4 13.2 5.6
 11 4 4 30.9 8
 11 4 4 11.6 6.4
 -11 -4 -4 17.5 4.9
 -11 -4 -4 13.1 4.2
 -11 -4 -4 11.8 5.9
 -11 -4 -4 19.9 5.7
 -11 -4 -4 10.7 4.7
 -11 -4 -4 19.3 3.8
 -11 -4 -4 10.8 5.4
 -11 -4 -4 21.2 3.8
 12 4 4 195.28 18.8
 12 4 4 218.68 22.7
 12 4 4 189.48 20.2
 12 4 4 217.18 21.1
 12 4 4 223.78 19.8
 12 4 4 207.58 21.6
 -12 -4 -4 201.98 18.9
 -12 -4 -4 212.08 19
 -12 -4 -4 210.78 14.8
 -12 -4 -4 182.08 17
 -12 -4 -4 204.68 14.8
 13 4 4 8.2 6.6
 13 4 4 3 6.8
 13 4 4 18.8 8.6
 13 4 4 11 6.2
 13 4 4 8.1 6.1
 -13 -4 -4 8.8 3.5
 -13 -4 -4 -3 3.6
 -13 -4 -4 8.4 6
 14 4 4 -1.1 5.8
 14 4 4 -0.6 5.6
 14 4 4 8.1 7.4
 14 4 4 14.1 8.6
 -14 -4 -4 1 6.5
 -14 -4 -4 -1 4
 -14 -4 -4 0 2.6
 -14 -4 -4 -7.2 4.7
 -12 5 5 105.89 13.4
 -12 5 5 91.79 17.1
 -12 5 5 70.89 11.5
 -12 5 5 99.79 15.9
 12 -5 -5 77.99 16.2
 12 -5 -5 37.7 15
 12 -5 -5 114.99 16.5
 -11 5 5 73.59 11.7
 -11 5 5 65.39 11.1
 -11 5 5 92.49 12
 -11 5 5 107.19 14.9
 11 -5 -5 97.49 15.2
 11 -5 -5 59.79 13.2
 11 -5 -5 66.89 16.7
 -10 5 5 4.5 4.9
 -10 5 5 5.6 4.9
 -10 5 5 4.1 5.2
 -10 5 5 22.3 7.3
 10 -5 -5 5.6 7.1
 10 -5 -5 8.8 7.6
 10 -5 -5 11.6 6.2
 10 -5 -5 5.6 8.5
 -9 5 5 -0.3 3.6
 -9 5 5 0 4.2
 -9 5 5 3.1 3.9
 -9 5 5 11.2 5.3
 9 -5 -5 12.6 6.1
 9 -5 -5 14.9 8.1
 9 -5 -5 -0.8 6.4
 9 -5 -5 6.1 6.5
 -8 5 5 2.9 4.2
 -8 5 5 -0.1 5.2
 -8 5 5 8.2 5.1
 -8 5 5 0.1 4.2
 -8 5 5 3.1 4.8
 -8 5 5 5 4.3
 8 -5 -5 0.7 7.4
 8 -5 -5 5.8 5.7
 8 -5 -5 6.8 6.4
 8 -5 -5 -2 4.8
 8 -5 -5 0 3.8
 8 -5 -5 0.5 2.4
 -7 5 5 28.9 6.4
 -7 5 5 30.1 6.9
 -7 5 5 38 7.3
 -7 5 5 26.3 6.4
 -7 5 5 32.2 7.3
 -7 5 5 33.3 8.4
 7 -5 -5 31.4 4.9
 7 -5 -5 27.5 6.9
 7 -5 -5 20.4 7.1
 7 -5 -5 25 9.1
 7 -5 -5 26.6 5.8
 -6 5 5 69.59 9.2
 -6 5 5 86.09 10.7
 -6 5 5 75.39 10.8
 -6 5 5 69.39 9.4
 -6 5 5 79.59 11.3
 -6 5 5 57.99 5.7
 -6 5 5 74.79 9.9
 -6 5 5 60.99 9.3
 6 -5 -5 36.2 10.7
 6 -5 -5 69.39 11.1
 6 -5 -5 70.19 9.6
 6 -5 -5 73.19 7.2
 6 -5 -5 52.79 9.2
 6 -5 -5 49.2 9.3
 -5 5 5 131.09 10.2
 -5 5 5 139.79 12.4
 -5 5 5 141.99 12.5
 -5 5 5 126.79 13.3
 -5 5 5 154.58 13.5
 -5 5 5 140.19 13.4
 -5 5 5 136.19 12.1
 -5 5 5 136.59 12.4
 -5 5 5 159.98 14.7
 5 -5 -5 120.79 11.9
 5 -5 -5 124.39 12.7
 5 -5 -5 128.29 12.7
 5 -5 -5 141.39 11.2
 5 -5 -5 151.48 13.4
 5 -5 -5 161.18 16.4
 5 -5 -5 121.59 13.4
 5 -5 -5 114.19 12
 -4 5 5 1.4 2.5
 -4 5 5 -0.5 2.4
 -4 5 5 -0.1 2.5
 -4 5 5 9.9 4.3
 -4 5 5 9.8 3.6
 -4 5 5 -0.3 2.6
 -4 5 5 8.2 3.8
 -4 5 5 4.1 3.9
 -4 5 5 2 3.3
 4 -5 -5 4.1 4
 4 -5 -5 2.3 3.3
 4 -5 -5 3.7 3
 4 -5 -5 2.9 3
 4 -5 -5 1.2 3.2
 4 -5 -5 1 3
 4 -5 -5 3.4 3.4
 4 -5 -5 5.6 2.3
 4 -5 -5 2.1 5.7
 4 -5 -5 3.9 3.4
 -3 5 5 81.59 9.8
 -3 5 5 80.79 9.7
 -3 5 5 69.39 8.4
 -3 5 5 63.99 8.3
 -3 5 5 60.79 7.8
 -3 5 5 78.89 8.2
 -3 5 5 63.69 7.4
 -3 5 5 62.39 7.6
 -3 5 5 52.99 7.9
 3 -5 -5 64.49 6.4
 3 -5 -5 71.49 7.6
 3 -5 -5 65.19 9
 3 -5 -5 63.99 8.6
 3 -5 -5 68.49 8.8
 3 -5 -5 71.39 9.4
 3 -5 -5 69.49 11
 3 -5 -5 80.79 9.7
 3 -5 -5 78.39 7.4
 3 -5 -5 58.29 7.7
 -2 5 5 95.69 11
 -2 5 5 83.19 8.2
 -2 5 5 96.39 8.9
 -2 5 5 90.59 9.3
 -2 5 5 106.39 8.5
 -2 5 5 102.69 9.2
 -2 5 5 96.89 9.1
 -2 5 5 95.59 8.8
 -2 5 5 81.39 8.7
 2 -5 -5 100.89 10.2
 2 -5 -5 93.89 9.1
 2 -5 -5 89.89 9.2
 2 -5 -5 105.29 9.5
 2 -5 -5 79.09 8.1
 2 -5 -5 86.09 9
 2 -5 -5 88.89 8.9
 2 -5 -5 90.29 10.5
 2 -5 -5 90.59 11.7
 2 -5 -5 102.49 8.4
 2 -5 -5 96.79 8.8
 -1 5 5 113.39 10.6
 -1 5 5 133.19 9.4
 -1 5 5 136.89 10.5
 -1 5 5 121.89 10.8
 -1 5 5 132.29 11.1
 -1 5 5 121.09 12.8
 -1 5 5 137.09 11.2
 -1 5 5 110.59 10.9
 -1 5 5 136.99 10.5
 -1 5 5 123.09 11.2
 -1 5 5 146.19 10.3
 -1 5 5 140.29 9.9
 1 -5 -5 143.49 12.7
 1 -5 -5 131.79 11.3
 1 -5 -5 133.99 11.3
 1 -5 -5 134.59 11
 1 -5 -5 115.69 10.4
 1 -5 -5 132.89 10.9
 1 -5 -5 138.79 11
 1 -5 -5 138.39 11.2
 1 -5 -5 112.99 9.8
 1 -5 -5 137.39 11.9
 0 5 5 11.3 3.5
 0 5 5 7.4 3.1
 0 5 5 17.5 2.7
 0 5 5 16.2 3.8
 0 5 5 14.9 3.8
 0 5 5 9.7 4.3
 0 5 5 11.7 3.9
 0 5 5 20.8 3.4
 0 5 5 8.9 3.2
 0 5 5 16.9 2.7
 0 5 5 14 2.8
 0 5 5 14.6 3.4
 0 5 5 10 3.6
 0 5 5 17.7 3.7
 0 -5 -5 16 3.9
 0 -5 -5 18.9 5.4
 0 -5 -5 17.7 3.5
 0 -5 -5 20.8 4
 0 -5 -5 12.4 2.7
 0 -5 -5 16.2 4
 0 -5 -5 12.6 3.2
 0 -5 -5 11.6 4.3
 0 -5 -5 11.2 3.6
 0 -5 -5 15.9 4
 0 -5 -5 16.2 3.8
 1 5 5 387.96 25.3
 1 5 5 323.37 28.4
 1 5 5 409.36 26.3
 1 5 5 401.16 23.7
 1 5 5 369.96 25.1
 1 5 5 369.56 25.3
 1 5 5 396.16 23.4
 1 5 5 366.76 25.1
 1 5 5 384.66 23.9
 1 5 5 390.46 23.4
 1 5 5 383.96 25
 1 5 5 359.06 25.7
 -1 -5 -5 356.76 26.3
 -1 -5 -5 384.86 25.6
 -1 -5 -5 402.56 23.8
 -1 -5 -5 362.36 28.5
 -1 -5 -5 359.86 24.6
 -1 -5 -5 362.96 23.5
 -1 -5 -5 390.16 24.6
 -1 -5 -5 396.86 25.4
 -1 -5 -5 416.46 25.8
 -1 -5 -5 400.36 25.6
 -1 -5 -5 380.46 25.8
 -1 -5 -5 357.86 23.9
 2 5 5 33.5 3.3
 2 5 5 33.9 6.1
 2 5 5 19 4.2
 2 5 5 30.9 5.4
 2 5 5 30 4.9
 2 5 5 26 3.8
 2 5 5 39 5.6
 2 5 5 26.6 4.5
 2 5 5 21 6.5
 2 5 5 31.8 4.5
 2 5 5 37.5 6.3
 2 5 5 26.3 4.6
 -2 -5 -5 33.6 3.5
 -2 -5 -5 29.5 4.3
 -2 -5 -5 28.7 7.1
 -2 -5 -5 37.8 4.1
 -2 -5 -5 29.9 5.4
 -2 -5 -5 29.9 3.1
 -2 -5 -5 29.4 5
 -2 -5 -5 27.4 4.7
 -2 -5 -5 28 3.3
 -2 -5 -5 38.8 6
 -2 -5 -5 19.9 5.2
 3 5 5 567.94 35.4
 3 5 5 543.65 37.4
 3 5 5 570.44 36.5
 3 5 5 564.14 36.1
 3 5 5 583.64 35.6
 3 5 5 591.94 35
 3 5 5 455.05 40.6
 3 5 5 586.44 35.9
 3 5 5 589.24 38
 3 5 5 580.64 37.6
 3 5 5 577.94 36.2
 -3 -5 -5 579.24 35.2
 -3 -5 -5 583.44 34.8
 -3 -5 -5 631.14 34.2
 -3 -5 -5 585.34 35.7
 -3 -5 -5 618.44 34.4
 -3 -5 -5 520.15 41.6
 -3 -5 -5 563.34 36.3
 -3 -5 -5 589.24 36.7
 -3 -5 -5 481.45 38.1
 -3 -5 -5 585.54 36.2
 -3 -5 -5 558.74 37.5
 4 5 5 3.8 3.4
 4 5 5 4.2 2.1
 4 5 5 2.7 2.4
 4 5 5 9.5 2.7
 4 5 5 9.3 3.5
 4 5 5 4.4 1.9
 4 5 5 6.3 2.3
 4 5 5 7.7 3.5
 4 5 5 8.7 3.2
 4 5 5 3.8 3.2
 -4 -5 -5 7 1.4
 -4 -5 -5 7.5 2.9
 -4 -5 -5 5.5 3.2
 -4 -5 -5 6.3 2.3
 -4 -5 -5 6.6 2
 -4 -5 -5 5.8 5.3
 -4 -5 -5 5.9 2.9
 -4 -5 -5 0.9 2.8
 -4 -5 -5 5.5 2.6
 5 5 5 181.58 15.3
 5 5 5 185.18 16
 5 5 5 200.88 12.3
 5 5 5 193.08 14.3
 5 5 5 190.08 16.6
 5 5 5 205.58 13.1
 5 5 5 180.78 14.9
 5 5 5 172.98 13.1
 5 5 5 186.78 13.7
 5 5 5 247.78 16
 -5 -5 -5 196.48 14.1
 -5 -5 -5 207.38 13.8
 -5 -5 -5 178.68 13.8
 -5 -5 -5 168.58 12.9
 -5 -5 -5 163.98 15.8
 -5 -5 -5 210.48 13.9
 -5 -5 -5 151.78 19.1
 -5 -5 -5 197.28 13.5
 6 5 5 83.69 11.5
 6 5 5 104.29 8
 6 5 5 101.09 8.4
 6 5 5 87.99 12
 6 5 5 94.19 11.2
 6 5 5 103.89 8.7
 6 5 5 91.69 9.7
 6 5 5 79.99 8.3
 6 5 5 100.39 11
 -6 -5 -5 84.89 7.2
 -6 -5 -5 73.59 14.6
 -6 -5 -5 88.79 8
 -6 -5 -5 95.79 8.2
 -6 -5 -5 97.59 8.4
 -6 -5 -5 90.59 8.2
 -6 -5 -5 68.79 10.5
 -6 -5 -5 88.49 8.1
 -6 -5 -5 84.59 7.8
 -6 -5 -5 89.79 7.8
 7 5 5 19.4 4.6
 7 5 5 19.7 4.6
 7 5 5 24.4 4.6
 7 5 5 21 5.6
 7 5 5 20.1 5.9
 7 5 5 13.4 4.9
 7 5 5 17.4 6.4
 7 5 5 14.2 6.2
 7 5 5 18.6 4.6
 -7 -5 -5 22.3 3.9
 -7 -5 -5 18.6 3.6
 -7 -5 -5 12.5 4
 -7 -5 -5 20.1 3.8
 -7 -5 -5 17.7 6
 -7 -5 -5 17.8 3.7
 -7 -5 -5 15.2 3.9
 -7 -5 -5 15.1 7.7
 -7 -5 -5 24 4.3
 -7 -5 -5 18.9 4.5
 8 5 5 10.5 5.9
 8 5 5 11.1 5.4
 8 5 5 11 4
 8 5 5 4.5 5.2
 8 5 5 0.5 3.1
 8 5 5 10.6 3.8
 8 5 5 13.3 3.8
 8 5 5 3.9 3.7
 8 5 5 5.8 3.6
 -8 -5 -5 5.7 2.8
 -8 -5 -5 13 3.8
 -8 -5 -5 10.2 2.9
 -8 -5 -5 13.7 3.6
 -8 -5 -5 13.6 4.6
 -8 -5 -5 11 4.1
 -8 -5 -5 5.4 5.8
 -8 -5 -5 5.7 5.2
 9 5 5 75.79 12.1
 9 5 5 84.29 8.6
 9 5 5 78.69 10.3
 9 5 5 86.99 10.9
 9 5 5 102.19 11.8
 9 5 5 70.69 11.9
 9 5 5 96.89 14.3
 9 5 5 101.59 11
 9 5 5 76.09 11.7
 -9 -5 -5 85.09 10
 -9 -5 -5 74.79 12.6
 -9 -5 -5 82.49 8.4
 -9 -5 -5 80.19 17.5
 -9 -5 -5 89.49 8
 -9 -5 -5 78.09 10.2
 -9 -5 -5 84.29 9.3
 -9 -5 -5 82.99 7.5
 10 5 5 31.5 9.5
 10 5 5 40.5 8
 10 5 5 38.8 7
 10 5 5 36.2 7.1
 10 5 5 42.1 7.6
 10 5 5 50.29 8.3
 10 5 5 23.4 7.3
 10 5 5 28.5 8.8
 10 5 5 26.1 7.5
 -10 -5 -5 34.3 5.9
 -10 -5 -5 35.7 7
 -10 -5 -5 29.1 5.2
 -10 -5 -5 47.7 5.5
 -10 -5 -5 26.5 6.3
 -10 -5 -5 27.6 10.2
 -10 -5 -5 41 9.6
 -10 -5 -5 29.8 7
 11 5 5 1.9 5
 11 5 5 10 5.9
 11 5 5 -1.6 4.5
 11 5 5 -0.3 4.6
 11 5 5 3.1 6.8
 11 5 5 -3.4 3.7
 11 5 5 1.1 3
 11 5 5 2.6 4
 -11 -5 -5 3.5 5.2
 -11 -5 -5 0.9 2.7
 -11 -5 -5 -0.3 3.1
 -11 -5 -5 -0.7 3
 -11 -5 -5 -3.2 4.6
 -11 -5 -5 -0.3 2
 -11 -5 -5 3.4 4.4
 -11 -5 -5 0.2 3.3
 -11 -5 -5 0.6 3.1
 12 5 5 35.9 11.2
 12 5 5 19 8.3
 12 5 5 13.4 7.9
 12 5 5 26 8.7
 12 5 5 27.6 8.1
 -12 -5 -5 23 8.2
 -12 -5 -5 16.7 5.4
 -12 -5 -5 15.5 6.7
 -12 -5 -5 23.7 4.2
 -12 -5 -5 32.4 5.2
 13 5 5 3.7 6.8
 13 5 5 19.6 7.6
 13 5 5 2.2 7.1
 13 5 5 9.1 8
 13 5 5 2.4 6.4
 -13 -5 -5 4.9 4.8
 -13 -5 -5 14.7 7
 -13 -5 -5 12.1 3.6
 -13 -5 -5 13.4 6.4
 14 5 5 21.7 8.8
 14 5 5 21.6 10.5
 14 5 5 18 8.2
 14 5 5 10.3 8.8
 14 5 5 26.2 11.4
 -14 -5 -5 28.7 5.1
 -14 -5 -5 15.8 8.6
 -14 -5 -5 14 7.6
 -11 6 6 18.4 6.7
 -11 6 6 29.7 8.1
 -11 6 6 14 6.6
 -11 6 6 19.2 7.9
 11 -6 -6 16.2 12.3
 11 -6 -6 34.7 10.8
 11 -6 -6 29.8 10.5
 -10 6 6 100.59 12.6
 -10 6 6 88.79 12.4
 -10 6 6 94.09 13.2
 -10 6 6 92.79 13.6
 10 -6 -6 95.49 14.8
 10 -6 -6 79.79 17.9
 10 -6 -6 49.99 15.2
 10 -6 -6 78.99 14.9
 -9 6 6 -2.4 4.3
 -9 6 6 -4.1 3.5
 -9 6 6 -4.3 4
 -9 6 6 -1.2 4.1
 9 -6 -6 0.3 5.3
 9 -6 -6 16.1 9.7
 9 -6 -6 9.4 7.1
 9 -6 -6 -4.3 6.7
 -8 6 6 26.5 7.2
 -8 6 6 9 4.7
 -8 6 6 14.7 5.4
 -8 6 6 14.5 5.7
 8 -6 -6 19.1 6.2
 8 -6 -6 19.5 9.3
 8 -6 -6 22.5 8.1
 8 -6 -6 20.9 7.9
 -7 6 6 -1.2 3.8
 -7 6 6 -5.8 4.6
 -7 6 6 -4.3 2.6
 -7 6 6 -2.7 3.1
 -7 6 6 -1 3.5
 -7 6 6 -2.2 3.1
 7 -6 -6 -0.5 2.5
 7 -6 -6 -2.9 4.4
 7 -6 -6 -0.8 6.3
 7 -6 -6 -2 5.3
 7 -6 -6 3.3 4
 -6 6 6 33.5 8.5
 -6 6 6 34.4 7.1
 -6 6 6 23.7 6.7
 -6 6 6 25.9 6
 -6 6 6 25.2 4.6
 -6 6 6 32.8 7.3
 -6 6 6 40 7.2
 6 -6 -6 26.4 9.6
 6 -6 -6 32.9 8.2
 6 -6 -6 28.2 7.5
 6 -6 -6 33.4 5.8
 6 -6 -6 33.8 7.3
 6 -6 -6 41.8 9.2
 6 -6 -6 24.3 6.3
 6 -6 -6 20 6.9
 -5 6 6 3.4 3.7
 -5 6 6 1.4 3.2
 -5 6 6 7.5 4.5
 -5 6 6 -3 2.8
 -5 6 6 1.4 3.4
 -5 6 6 7.8 4
 -5 6 6 1.4 5
 -5 6 6 3.1 4.1
 5 -6 -6 4.4 4.5
 5 -6 -6 1 2
 5 -6 -6 1.3 3.4
 5 -6 -6 -6.7 4.9
 5 -6 -6 3.7 3.9
 5 -6 -6 0.5 3.6
 5 -6 -6 10.2 5
 5 -6 -6 7 4.9
 5 -6 -6 8.1 4.9
 -4 6 6 800.72 50.69
 -4 6 6 844.12 51.79
 -4 6 6 826.22 51.49
 -4 6 6 823.12 51.99
 -4 6 6 796.52 50.79
 -4 6 6 778.02 49.8
 -4 6 6 871.41 54.39
 4 -6 -6 766.22 52.49
 4 -6 -6 811.22 51.29
 4 -6 -6 785.42 50.79
 4 -6 -6 739.03 52.39
 4 -6 -6 776.22 51.09
 4 -6 -6 797.92 50.09
 4 -6 -6 839.62 52.39
 4 -6 -6 793.62 48.9
 4 -6 -6 766.82 51.89
 4 -6 -6 739.13 54.19
 -3 6 6 103.69 10.5
 -3 6 6 98.69 12.3
 -3 6 6 102.99 9.9
 -3 6 6 111.59 12.3
 -3 6 6 107.29 12.6
 -3 6 6 104.89 11
 -3 6 6 98.29 9.5
 -3 6 6 82.59 11
 3 -6 -6 104.89 9.8
 3 -6 -6 86.59 11.4
 3 -6 -6 110.09 14.9
 3 -6 -6 98.49 12
 3 -6 -6 109.89 10.4
 3 -6 -6 100.29 11.6
 3 -6 -6 108.89 10.7
 3 -6 -6 94.39 8.8
 3 -6 -6 101.39 11.8
 -2 6 6 101.99 9.5
 -2 6 6 89.89 8.5
 -2 6 6 77.49 10
 -2 6 6 98.39 9.6
 -2 6 6 122.09 9.1
 -2 6 6 86.49 10.9
 -2 6 6 87.19 8
 -2 6 6 105.99 10.1
 -2 6 6 96.59 9.8
 -2 6 6 94.49 9.2
 -2 6 6 93.19 11.8
 2 -6 -6 87.79 12.7
 2 -6 -6 88.79 9.1
 2 -6 -6 84.39 10.4
 2 -6 -6 105.59 12.1
 2 -6 -6 109.79 10
 2 -6 -6 107.29 11.5
 2 -6 -6 100.09 10.1
 2 -6 -6 89.89 9.9
 2 -6 -6 103.79 9.8
 2 -6 -6 83.79 9.5
 -1 6 6 64.39 8.3
 -1 6 6 49.7 8.1
 -1 6 6 78.39 7.7
 -1 6 6 80.49 10.9
 -1 6 6 73.69 7.6
 -1 6 6 96.79 10.4
 -1 6 6 80.49 6.8
 -1 6 6 85.09 9.6
 -1 6 6 68.29 8.6
 -1 6 6 85.09 7.2
 -1 6 6 89.59 8
 1 -6 -6 80.39 8.7
 1 -6 -6 83.99 10.1
 1 -6 -6 64.99 9.3
 1 -6 -6 83.49 8.4
 1 -6 -6 79.99 8.7
 1 -6 -6 87.29 10.4
 1 -6 -6 91.09 9.1
 1 -6 -6 71.09 7.3
 1 -6 -6 78.39 8.2
 1 -6 -6 68.49 8.4
 1 -6 -6 87.09 11.3
 0 6 6 4.3 2
 0 6 6 2.9 2.4
 0 6 6 4.5 3.3
 0 6 6 3.4 2
 0 6 6 3 3
 0 6 6 4.1 2
 0 6 6 3.8 2.8
 0 6 6 3.6 2.8
 0 6 6 7.6 3.9
 0 6 6 10.4 3.5
 0 6 6 2.9 2.5
 0 6 6 4.6 4.3
 0 -6 -6 1.4 3.9
 0 -6 -6 7.8 6.5
 0 -6 -6 0.9 2.4
 0 -6 -6 7.8 3.3
 0 -6 -6 2.4 2.9
 0 -6 -6 5 3.4
 0 -6 -6 2.5 3
 0 -6 -6 1.7 2.5
 0 -6 -6 4.2 3.7
 0 -6 -6 2.4 2.1
 1 6 6 24.2 3.6
 1 6 6 14.5 6.3
 1 6 6 22 4.4
 1 6 6 26.9 3.3
 1 6 6 19.3 5.2
 1 6 6 21.9 4.8
 1 6 6 15.6 3.9
 1 6 6 19 2.9
 1 6 6 19.4 3.5
 -1 -6 -6 20.5 6.7
 -1 -6 -6 11.8 4.3
 -1 -6 -6 16.7 3.4
 -1 -6 -6 26.8 5.2
 -1 -6 -6 19.4 4.7
 -1 -6 -6 19.9 3.2
 -1 -6 -6 21.1 4.2
 -1 -6 -6 22.8 5.3
 -1 -6 -6 16.8 5
 -1 -6 -6 20.4 4.7
 2 6 6 14.7 3.2
 2 6 6 17.5 6.7
 2 6 6 16.6 4.1
 2 6 6 10.7 3.8
 2 6 6 21.8 5.5
 2 6 6 17 2.5
 2 6 6 24.2 5.2
 2 6 6 20.6 2.9
 -2 -6 -6 20.7 3.2
 -2 -6 -6 15.8 4.1
 -2 -6 -6 30.7 5.6
 -2 -6 -6 22.7 4.9
 -2 -6 -6 22.7 3
 -2 -6 -6 21 7
 -2 -6 -6 19 5.1
 -2 -6 -6 22.6 3.6
 -2 -6 -6 15.9 5
 -2 -6 -6 18.1 3.6
 3 6 6 3.7 2.7
 3 6 6 8 2.5
 3 6 6 4.3 3.2
 3 6 6 2.8 3.6
 3 6 6 4.1 4.4
 3 6 6 0.1 2.3
 3 6 6 3 1.7
 3 6 6 3.4 2
 3 6 6 3.4 2.4
 3 6 6 4.8 4.1
 -3 -6 -6 7.3 2.4
 -3 -6 -6 7 3.6
 -3 -6 -6 1.4 1.9
 -3 -6 -6 3.3 4.3
 -3 -6 -6 10.1 3.9
 -3 -6 -6 10.2 4.3
 -3 -6 -6 6.9 3.2
 -3 -6 -6 4.5 1.6
 -3 -6 -6 2.2 1.5
 -3 -6 -6 2.4 2.8
 -3 -6 -6 2 1.8
 4 6 6 34.3 4.6
 4 6 6 42.3 7.7
 4 6 6 28.6 6.7
 4 6 6 40.6 5.7
 4 6 6 34.2 6.1
 4 6 6 41.2 4.9
 4 6 6 39.2 5.4
 4 6 6 38.1 7.3
 4 6 6 36.5 6.1
 -4 -6 -6 35 9.6
 -4 -6 -6 39.2 6
 -4 -6 -6 37.5 4.5
 -4 -6 -6 37.4 6.1
 -4 -6 -6 37.4 3.2
 -4 -6 -6 28.7 6.2
 -4 -6 -6 23.7 6.6
 -4 -6 -6 32.9 5.6
 -4 -6 -6 33.6 6.1
 -4 -6 -6 44.7 5.2
 5 6 6 -3.3 2
 5 6 6 -2.6 3
 5 6 6 1.9 1.5
 5 6 6 1.2 2.3
 5 6 6 1.2 4.1
 5 6 6 1.2 2.1
 5 6 6 -0.6 2.6
 5 6 6 2.6 2.1
 5 6 6 2.3 3.2
 -5 -6 -6 0 3.7
 -5 -6 -6 -3.1 2.2
 -5 -6 -6 0.3 2.1
 -5 -6 -6 -1.6 2
 -5 -6 -6 1.8 1.2
 -5 -6 -6 -4.1 1.5
 -5 -6 -6 4.5 2.9
 -5 -6 -6 -0.3 2.8
 -5 -6 -6 -3.7 3.1
 -5 -6 -6 -3.1 2.3
 6 6 6 366.26 24.5
 6 6 6 336.77 25.8
 6 6 6 357.96 23.2
 6 6 6 348.47 26.3
 6 6 6 351.16 27.7
 6 6 6 367.16 25.2
 6 6 6 379.96 27.8
 6 6 6 373.26 23.6
 -6 -6 -6 372.26 24.7
 -6 -6 -6 328.57 22.7
 -6 -6 -6 384.06 24.4
 -6 -6 -6 379.06 28
 -6 -6 -6 356.06 24.1
 -6 -6 -6 397.76 25
 -6 -6 -6 351.26 23.3
 -6 -6 -6 332.37 32.5
 -6 -6 -6 378.86 24
 7 6 6 11.2 4.8
 7 6 6 10.5 4.3
 7 6 6 12.7 4.4
 7 6 6 15.7 5.5
 7 6 6 16.2 4.4
 7 6 6 7.7 4.5
 7 6 6 15.9 3.7
 7 6 6 13.6 3.8
 7 6 6 7.4 5.5
 -7 -6 -6 10.3 7
 -7 -6 -6 11.6 3.4
 -7 -6 -6 14.8 4.1
 -7 -6 -6 10.3 3.8
 -7 -6 -6 17 4.4
 -7 -6 -6 11.4 5.6
 -7 -6 -6 10.9 3.5
 -7 -6 -6 11.6 3.7
 -7 -6 -6 18.5 4.5
 -7 -6 -6 11.3 2.9
 8 6 6 232.88 16.8
 8 6 6 200.28 19.7
 8 6 6 242.78 16.6
 8 6 6 204.08 18
 8 6 6 245.98 21.2
 8 6 6 209.18 18.4
 8 6 6 252.57 19.6
 8 6 6 232.58 17.2
 8 6 6 204.48 17.1
 -8 -6 -6 223.68 15.6
 -8 -6 -6 201.98 15.6
 -8 -6 -6 235.28 17
 -8 -6 -6 225.98 20.7
 -8 -6 -6 237.18 17
 -8 -6 -6 168.18 23.7
 -8 -6 -6 231.08 16.3
 -8 -6 -6 203.38 15.3
 -8 -6 -6 201.88 16
 -8 -6 -6 212.28 16.1
 9 6 6 66.69 10.3
 9 6 6 80.09 13.4
 9 6 6 54.19 9.9
 9 6 6 57.99 9.1
 9 6 6 49.2 11.2
 9 6 6 72.19 9
 9 6 6 74.09 11.9
 9 6 6 81.99 9.9
 -9 -6 -6 80.89 8.6
 -9 -6 -6 51.89 10.9
 -9 -6 -6 67.39 7.6
 -9 -6 -6 81.89 9.9
 -9 -6 -6 70.09 7.9
 -9 -6 -6 41.7 7.5
 -9 -6 -6 44.7 12.7
 -9 -6 -6 70.39 8.7
 10 6 6 43.9 8.3
 10 6 6 40.7 9.4
 10 6 6 56.69 8.5
 10 6 6 36.9 10.4
 10 6 6 42.6 7.8
 10 6 6 25.8 8.9
 10 6 6 37.5 9.1
 10 6 6 39.2 8
 -10 -6 -6 37.9 7.6
 -10 -6 -6 29.1 6.6
 -10 -6 -6 36.7 12.8
 -10 -6 -6 54.39 6.5
 -10 -6 -6 44.9 6.7
 -10 -6 -6 40.8 6.9
 -10 -6 -6 43.8 10.3
 -10 -6 -6 40.7 6.4
 11 6 6 36.7 10.2
 11 6 6 46.8 8.8
 11 6 6 46.9 11.8
 11 6 6 28.5 8.2
 11 6 6 41.6 8.3
 11 6 6 37.8 9.3
 11 6 6 49.5 8.9
 11 6 6 44.9 8.6
 -11 -6 -6 33.8 9.9
 -11 -6 -6 53.89 6.8
 -11 -6 -6 53.69 9.1
 -11 -6 -6 35.9 7.1
 -11 -6 -6 36.5 5.5
 -11 -6 -6 39.4 6.7
 12 6 6 17.8 7.8
 12 6 6 29.1 8.5
 12 6 6 15.3 7.5
 12 6 6 13.1 5.9
 12 6 6 6.6 5.9
 12 6 6 27.4 10.2
 -12 -6 -6 16.8 4.6
 -12 -6 -6 9.5 7.5
 -12 -6 -6 24.3 6.9
 -12 -6 -6 18.9 4
 13 6 6 3.1 7.2
 13 6 6 0.7 6
 13 6 6 2.8 7.5
 13 6 6 -7.7 4.8
 13 6 6 5.9 5.7
 -13 -6 -6 6 3.7
 -13 -6 -6 2.8 5.2
 -13 -6 -6 -6.5 5.2
 14 6 6 20.3 8.4
 14 6 6 14.9 9.2
 14 6 6 36.1 11
 14 6 6 10.5 8.9
 -14 -6 -6 11 6.8
 -14 -6 -6 14.4 4.2
 -14 -6 -6 16.7 9.2
 -10 7 7 0.6 4.7
 -10 7 7 7.6 5.6
 -10 7 7 2.4 4.5
 -10 7 7 9.7 6.4
 10 -7 -7 1.5 7.9
 10 -7 -7 17.9 8.1
 10 -7 -7 -1.2 8.3
 -9 7 7 149.88 18.7
 -9 7 7 141.99 17.3
 -9 7 7 165.38 16.5
 -9 7 7 167.98 15.7
 9 -7 -7 154.98 21
 9 -7 -7 106.19 17.8
 9 -7 -7 160.78 20.4
 9 -7 -7 103.29 20.1
 -8 7 7 6.8 5.2
 -8 7 7 5 5.4
 -8 7 7 4.1 4.2
 -8 7 7 -1.8 4.2
 8 -7 -7 10.6 6.5
 8 -7 -7 -1.1 4.5
 8 -7 -7 2 6.2
 8 -7 -7 7.9 9.6
 -7 7 7 139.49 14.2
 -7 7 7 159.28 15.4
 -7 7 7 179.28 16.1
 -7 7 7 154.58 15.2
 7 -7 -7 147.09 15.1
 7 -7 -7 154.58 18.7
 7 -7 -7 91.19 18.6
 7 -7 -7 185.98 20.5
 -6 7 7 277.87 21.2
 -6 7 7 285.87 21.8
 -6 7 7 280.17 21.6
 -6 7 7 260.57 20.5
 -6 7 7 264.67 22.1
 -6 7 7 264.57 24.4
 6 -7 -7 260.87 25.6
 6 -7 -7 251.27 21
 6 -7 -7 274.07 22.6
 6 -7 -7 224.28 20.9
 6 -7 -7 249.48 19.4
 6 -7 -7 229.08 20.5
 -5 7 7 1130.59 69.39
 -5 7 7 1158.58 69.49
 -5 7 7 1052.09 66.49
 -5 7 7 1057.89 68.09
 -5 7 7 1153.08 69.89
 -5 7 7 1084.89 71.99
 5 -7 -7 1104.19 67.19
 5 -7 -7 939.71 71.99
 5 -7 -7 1111.69 68.89
 5 -7 -7 1161.18 70.49
 5 -7 -7 1130.19 69.09
 5 -7 -7 1039.4 68.09
 5 -7 -7 1042.9 69.59
 5 -7 -7 931.81 69.69
 -4 7 7 5.2 5.7
 -4 7 7 8.8 4.8
 -4 7 7 13.7 5.1
 -4 7 7 16.8 5.6
 -4 7 7 8.1 4.3
 -4 7 7 12.9 4.9
 -4 7 7 10.2 4.7
 -4 7 7 12.8 5.7
 4 -7 -7 2.9 4.7
 4 -7 -7 17.5 5.4
 4 -7 -7 12 4.9
 4 -7 -7 15.3 5.5
 4 -7 -7 10.1 3.5
 4 -7 -7 14.5 5
 4 -7 -7 2.7 4.3
 4 -7 -7 7.1 4.9
 4 -7 -7 4.2 5.2
 4 -7 -7 8.9 7.7
 -3 7 7 232.68 18.6
 -3 7 7 220.68 17.5
 -3 7 7 192.98 15.9
 -3 7 7 196.48 16.4
 -3 7 7 223.98 17.3
 -3 7 7 210.08 17.3
 -3 7 7 233.98 16.1
 -3 7 7 193.68 19.9
 -3 7 7 197.08 16.6
 3 -7 -7 170.38 17
 3 -7 -7 238.88 18
 3 -7 -7 223.88 18.7
 3 -7 -7 188.38 16.1
 3 -7 -7 216.68 19.1
 3 -7 -7 192.48 17.7
 3 -7 -7 235.08 17.2
 3 -7 -7 179.18 19.2
 3 -7 -7 176.98 15.3
 -2 7 7 14.7 4.8
 -2 7 7 9.9 4
 -2 7 7 18.4 5.8
 -2 7 7 22.9 5.3
 -2 7 7 14.1 5
 -2 7 7 17.5 4.8
 -2 7 7 25.4 6
 -2 7 7 29.4 8.5
 -2 7 7 17 4.1
 -2 7 7 12.9 3.7
 2 -7 -7 22.2 5.8
 2 -7 -7 23.8 6
 2 -7 -7 20.8 5.5
 2 -7 -7 27.7 7.2
 2 -7 -7 14.1 4.8
 2 -7 -7 25.8 6.3
 2 -7 -7 20.2 6.7
 2 -7 -7 17.8 5.1
 2 -7 -7 13.4 7.6
 -1 7 7 475.15 30.6
 -1 7 7 453.05 30.4
 -1 7 7 469.75 29.2
 -1 7 7 424.76 27.8
 -1 7 7 428.16 30.4
 -1 7 7 503.95 29.7
 -1 7 7 418.66 29.2
 -1 7 7 465.45 28.4
 -1 7 7 387.86 27.7
 -1 7 7 358.06 33
 1 -7 -7 444.56 30.2
 1 -7 -7 439.26 31.8
 1 -7 -7 455.15 30.6
 1 -7 -7 465.55 33
 1 -7 -7 450.25 30.3
 1 -7 -7 424.76 30.1
 1 -7 -7 403.86 29.6
 1 -7 -7 423.76 29.3
 1 -7 -7 422.26 30.7
 1 -7 -7 450.95 31.6
 0 7 7 246.88 17.9
 0 7 7 229.08 15.1
 0 7 7 243.78 15.6
 0 7 7 236.58 16.2
 0 7 7 189.28 20.8
 0 7 7 229.58 16.9
 0 7 7 209.48 15.5
 0 7 7 225.08 17.1
 0 7 7 231.38 17.5
 0 7 7 238.48 18.5
 0 -7 -7 235.18 18.5
 0 -7 -7 212.18 18.5
 0 -7 -7 211.08 17.9
 0 -7 -7 251.97 21.3
 0 -7 -7 237.78 17.2
 0 -7 -7 198.78 16.4
 0 -7 -7 188.88 15.6
 0 -7 -7 244.48 18.2
 0 -7 -7 216.88 18.5
 0 -7 -7 235.98 18
 1 7 7 30.7 4.7
 1 7 7 42.1 7.5
 1 7 7 46.9 7.2
 1 7 7 30.3 8.4
 1 7 7 48.5 4.5
 1 7 7 32.9 5.8
 1 7 7 42.6 5.1
 1 7 7 47.2 4.9
 1 7 7 36 6.1
 -1 -7 -7 36 4.9
 -1 -7 -7 51.29 6.7
 -1 -7 -7 33.2 5.3
 -1 -7 -7 42.7 6.5
 -1 -7 -7 43 7.1
 -1 -7 -7 41.2 7.5
 -1 -7 -7 32.7 6.9
 -1 -7 -7 43.8 9.7
 -1 -7 -7 39.2 7.2
 2 7 7 27.7 8.9
 2 7 7 37.2 6.3
 2 7 7 36.5 6.1
 2 7 7 47.3 5.8
 2 7 7 46.6 7.8
 2 7 7 40 4.1
 2 7 7 41.9 4
 2 7 7 52.59 8.5
 -2 -7 -7 28 4.4
 -2 -7 -7 32.9 6.3
 -2 -7 -7 27.1 5.6
 -2 -7 -7 46.5 7.7
 -2 -7 -7 30.4 6.6
 -2 -7 -7 41.6 5.1
 -2 -7 -7 41 5.7
 -2 -7 -7 43.3 7.5
 -2 -7 -7 34.9 4.4
 -2 -7 -7 29.7 9
 3 7 7 6.6 3.1
 3 7 7 8.6 3.3
 3 7 7 12.9 4.5
 3 7 7 12.2 3.2
 3 7 7 13.2 4.1
 3 7 7 10.2 2.4
 3 7 7 13.7 4.7
 3 7 7 7.7 4.3
 3 7 7 9.3 6.7
 -3 -7 -7 10.4 2.6
 -3 -7 -7 10.2 2.2
 -3 -7 -7 7.1 5.1
 -3 -7 -7 14.9 4.7
 -3 -7 -7 11.2 3.1
 -3 -7 -7 9.5 2.9
 -3 -7 -7 5.6 3
 -3 -7 -7 14.1 4.4
 -3 -7 -7 6.9 4.1
 -3 -7 -7 13.5 4.8
 -3 -7 -7 9.1 4.9
 4 7 7 42.4 8.5
 4 7 7 39.8 7
 4 7 7 52.89 6.9
 4 7 7 39.9 8.1
 4 7 7 41 5.6
 4 7 7 35.2 5.5
 4 7 7 50.19 7.8
 4 7 7 48.6 8.5
 4 7 7 44.3 5.4
 -4 -7 -7 44.4 11.3
 -4 -7 -7 42.2 6.8
 -4 -7 -7 37.2 5.5
 -4 -7 -7 38.7 7
 -4 -7 -7 49.8 7.7
 -4 -7 -7 33.3 8.3
 -4 -7 -7 37.1 7.3
 -4 -7 -7 46.1 4.7
 -4 -7 -7 46.5 3.8
 -4 -7 -7 48.5 5.1
 -4 -7 -7 50.09 7.1
 5 7 7 5.7 3.8
 5 7 7 3.8 2.2
 5 7 7 0.2 3.6
 5 7 7 5.1 3.7
 5 7 7 9.9 5.8
 5 7 7 4.4 2.6
 5 7 7 0.7 2.4
 5 7 7 6.3 3.4
 5 7 7 6.2 4.3
 -5 -7 -7 3.1 5.7
 -5 -7 -7 0.8 2.7
 -5 -7 -7 8 4.1
 -5 -7 -7 9.1 3.9
 -5 -7 -7 3.2 4.9
 -5 -7 -7 8.8 3.2
 -5 -7 -7 4.3 1.5
 -5 -7 -7 0.7 3.4
 -5 -7 -7 8.2 2.7
 -5 -7 -7 7.5 4.7
 6 7 7 154.98 15.7
 6 7 7 155.28 16
 6 7 7 182.28 12.6
 6 7 7 193.88 14.9
 6 7 7 175.58 12.9
 6 7 7 176.68 12.2
 6 7 7 175.48 13.8
 6 7 7 171.48 17.1
 6 7 7 148.69 14.8
 -6 -7 -7 193.28 15
 -6 -7 -7 142.99 17.6
 -6 -7 -7 157.18 21.6
 -6 -7 -7 178.18 13.6
 -6 -7 -7 173.18 17
 -6 -7 -7 186.68 13.1
 -6 -7 -7 179.68 11.2
 -6 -7 -7 183.88 14.6
 -6 -7 -7 158.58 13.7
 7 7 7 77.09 9.3
 7 7 7 56.89 10.4
 7 7 7 85.49 8.6
 7 7 7 69.79 9.6
 7 7 7 63.89 11.4
 7 7 7 68.29 10.1
 7 7 7 73.79 10.9
 7 7 7 67.99 6.9
 -7 -7 -7 67.79 15.7
 -7 -7 -7 56.99 10.8
 -7 -7 -7 60.39 12
 -7 -7 -7 64.59 6.4
 -7 -7 -7 60.99 5.7
 -7 -7 -7 65.99 8.8
 -7 -7 -7 87.99 9.3
 -7 -7 -7 69.19 8.6
 -7 -7 -7 72.69 9.4
 -7 -7 -7 80.49 9.1
 -7 -7 -7 70.39 7.6
 8 7 7 274.87 22.8
 8 7 7 279.27 25
 8 7 7 254.97 23.9
 8 7 7 286.07 21.2
 8 7 7 293.57 21.8
 8 7 7 259.87 22.5
 8 7 7 272.67 20
 8 7 7 294.17 20.1
 -8 -7 -7 290.27 20.7
 -8 -7 -7 293.47 20.5
 -8 -7 -7 281.17 24.9
 -8 -7 -7 289.37 20.6
 -8 -7 -7 281.67 19.8
 -8 -7 -7 256.17 30
 -8 -7 -7 280.07 18.7
 -8 -7 -7 301.17 20.8
 -8 -7 -7 275.67 19.3
 9 7 7 95.69 11.6
 9 7 7 77.19 14
 9 7 7 91.69 13.6
 9 7 7 99.89 9.6
 9 7 7 88.19 11.4
 9 7 7 77.09 14
 9 7 7 105.09 11
 9 7 7 95.89 12.9
 9 7 7 99.89 13.9
 -9 -7 -7 72.29 13.2
 -9 -7 -7 94.69 9.5
 -9 -7 -7 86.49 9.7
 -9 -7 -7 98.79 10.7
 -9 -7 -7 76.39 17.6
 -9 -7 -7 73.69 9.4
 -9 -7 -7 95.39 8.2
 -9 -7 -7 93.29 10.8
 10 7 7 289.77 23.1
 10 7 7 311.27 24.3
 10 7 7 301.77 22.3
 10 7 7 317.87 22.5
 10 7 7 348.87 28.6
 10 7 7 271.07 24.8
 10 7 7 259.27 26
 10 7 7 354.26 26.5
 -10 -7 -7 248.18 25.9
 -10 -7 -7 291.57 21.1
 -10 -7 -7 296.47 22.5
 -10 -7 -7 311.27 22.7
 -10 -7 -7 306.17 21.5
 11 7 7 60.79 10.9
 11 7 7 81.69 15.6
 11 7 7 90.59 11.9
 11 7 7 78.49 14
 11 7 7 65.79 12.8
 11 7 7 99.69 16.4
 11 7 7 77.99 11.4
 -11 -7 -7 85.79 9.7
 -11 -7 -7 92.69 11.7
 -11 -7 -7 54.89 12.1
 -11 -7 -7 81.99 8.3
 12 7 7 -7.4 5.1
 12 7 7 -3.6 4.6
 12 7 7 -1.6 5.7
 12 7 7 -9.8 3.9
 12 7 7 -1.1 5.7
 12 7 7 5.8 7.4
 -12 -7 -7 1.8 6
 -12 -7 -7 1.5 3.5
 -12 -7 -7 5.5 5
 13 7 7 1.8 7
 13 7 7 16.6 7.3
 13 7 7 3.5 6.4
 13 7 7 6.3 7.9
 13 7 7 4.3 6
 -13 -7 -7 9.4 4.4
 -13 -7 -7 12.5 8.1
 -13 -7 -7 11.8 5.7
 -9 8 8 4.5 5.3
 -9 8 8 0.3 5.3
 -9 8 8 7.6 6.3
 -9 8 8 7.9 5.6
 9 -8 -8 6.4 6.8
 9 -8 -8 5.9 8.8
 9 -8 -8 8.1 8.5
 -8 8 8 -0.5 4.9
 -8 8 8 4.9 5.1
 -8 8 8 -3.3 4.1
 -8 8 8 2.1 4.5
 8 -8 -8 -3.5 6.4
 8 -8 -8 -11.6 6.5
 8 -8 -8 -0.4 5.5
 8 -8 -8 -8.5 5.3
 -7 8 8 126.59 16
 -7 8 8 94.09 13.1
 -7 8 8 122.39 15.6
 -7 8 8 142.09 16.3
 7 -8 -8 138.79 18.4
 7 -8 -8 117.49 20.7
 7 -8 -8 157.68 19.4
 7 -8 -8 107.29 14.9
 -6 8 8 66.59 10.2
 -6 8 8 57.69 9.8
 -6 8 8 40.3 8.8
 -6 8 8 56.89 11.2
 6 -8 -8 24.5 10.7
 6 -8 -8 48 8.2
 6 -8 -8 47.4 10.2
 6 -8 -8 46.9 10.6
 6 -8 -8 41.6 8.8
 6 -8 -8 44.6 9.4
 -5 8 8 3.3 4.6
 -5 8 8 4.5 4.5
 -5 8 8 4.5 4.3
 -5 8 8 -5.1 3.5
 -5 8 8 7.2 5.1
 -5 8 8 3.4 6.3
 -5 8 8 5 4.3
 5 -8 -8 0.8 4.4
 5 -8 -8 2.6 8.4
 5 -8 -8 1.8 4.8
 5 -8 -8 1 4.5
 5 -8 -8 2.7 5.4
 5 -8 -8 -3 3.9
 5 -8 -8 -3.5 4.5
 -4 8 8 17.5 8
 -4 8 8 19.9 6.7
 -4 8 8 20.8 6.1
 -4 8 8 16.4 5.8
 -4 8 8 13.7 5.6
 -4 8 8 24.1 6.1
 -4 8 8 21.6 6.5
 -4 8 8 35.2 8
 4 -8 -8 18.2 7.1
 4 -8 -8 14.6 5.9
 4 -8 -8 13.3 6.2
 4 -8 -8 16.6 5.9
 4 -8 -8 27.4 7.7
 4 -8 -8 23.3 9.8
 4 -8 -8 11.4 5.3
 4 -8 -8 23.1 7.6
 4 -8 -8 5.7 5.3
 -3 8 8 6.7 5.9
 -3 8 8 1.1 4.1
 -3 8 8 7.5 5.1
 -3 8 8 1.4 4.4
 -3 8 8 7.4 3.8
 -3 8 8 8.6 4.7
 -3 8 8 12 4.6
 -3 8 8 3.7 3.3
 -3 8 8 3.9 4.4
 3 -8 -8 -1 4.2
 3 -8 -8 5.5 4.5
 3 -8 -8 11 6.2
 3 -8 -8 12.5 6.3
 3 -8 -8 -1.7 3.7
 3 -8 -8 2.1 4.2
 3 -8 -8 1.3 4.1
 3 -8 -8 7 7.9
 -2 8 8 177.28 15.5
 -2 8 8 182.48 14.8
 -2 8 8 169.68 15.4
 -2 8 8 166.08 14
 -2 8 8 167.08 15.5
 -2 8 8 153.78 12.9
 -2 8 8 145.19 18.2
 -2 8 8 178.38 13.7
 -2 8 8 184.08 14.7
 2 -8 -8 191.68 17.8
 2 -8 -8 145.09 15.1
 2 -8 -8 156.68 17.3
 2 -8 -8 181.98 16.1
 2 -8 -8 147.89 15.3
 2 -8 -8 147.19 14.1
 2 -8 -8 180.58 15.7
 2 -8 -8 180.28 18.1
 2 -8 -8 195.58 15.9
 -1 8 8 12.1 4.4
 -1 8 8 14.1 5
 -1 8 8 14.9 4.6
 -1 8 8 21.7 6.2
 -1 8 8 15.7 3.8
 -1 8 8 8.8 5.9
 -1 8 8 12.7 3.7
 -1 8 8 11.2 4.4
 -1 8 8 1.3 4.3
 -1 8 8 18.9 4
 1 -8 -8 17.5 5.4
 1 -8 -8 17.6 5.6
 1 -8 -8 20.1 6.2
 1 -8 -8 7.7 4.2
 1 -8 -8 10.3 6.1
 1 -8 -8 18.1 5.3
 1 -8 -8 9.6 5.1
 1 -8 -8 24.4 8
 1 -8 -8 17.6 7.2
 1 -8 -8 15 5.5
 0 8 8 98.99 8.9
 0 8 8 95.79 10.4
 0 8 8 65.99 13.5
 0 8 8 120.59 11.2
 0 8 8 93.59 8.3
 0 8 8 106.59 9.3
 0 8 8 102.89 12.8
 0 8 8 99.59 12.8
 0 8 8 95.59 8.2
 0 -8 -8 119.99 10.7
 0 -8 -8 101.99 11.6
 0 -8 -8 98.29 10
 0 -8 -8 113.89 14.6
 0 -8 -8 95.79 13
 0 -8 -8 83.79 12.3
 0 -8 -8 86.19 10.7
 0 -8 -8 100.79 11.6
 0 -8 -8 113.39 13.6
 0 -8 -8 101.69 12.8
 1 8 8 45.3 7.5
 1 8 8 41.6 5.8
 1 8 8 44 5.4
 1 8 8 62.09 8.9
 1 8 8 57.89 9.6
 1 8 8 57.89 8
 1 8 8 40.9 10.9
 1 8 8 55.39 6.7
 1 8 8 51.89 5.3
 -1 -8 -8 39.3 8.4
 -1 -8 -8 47.9 8.7
 -1 -8 -8 52.39 11.7
 -1 -8 -8 71.89 10.6
 -1 -8 -8 48.7 8.9
 -1 -8 -8 43.8 6.4
 -1 -8 -8 42.6 5.9
 -1 -8 -8 43 8.4
 -1 -8 -8 51.49 7.5
 -1 -8 -8 48.2 8.2
 2 8 8 175.88 13.2
 2 8 8 172.08 12.1
 2 8 8 161.48 11.9
 2 8 8 193.38 14.7
 2 8 8 199.38 15.3
 2 8 8 154.48 19.8
 2 8 8 194.38 16.8
 2 8 8 145.29 14.5
 2 8 8 169.08 14.5
 -2 -8 -8 194.88 15.8
 -2 -8 -8 188.58 16.2
 -2 -8 -8 179.28 17.6
 -2 -8 -8 177.88 13.8
 -2 -8 -8 193.28 16.1
 -2 -8 -8 184.58 16.5
 -2 -8 -8 163.78 12.4
 -2 -8 -8 181.88 20.7
 -2 -8 -8 167.08 13
 3 8 8 204.78 15.3
 3 8 8 185.58 17
 3 8 8 165.78 15
 3 8 8 149.19 15.2
 3 8 8 196.38 14.6
 3 8 8 151.68 20.5
 3 8 8 176.28 12.4
 3 8 8 168.88 13.5
 3 8 8 179.78 15
 -3 -8 -8 168.38 12.5
 -3 -8 -8 190.78 16.5
 -3 -8 -8 191.48 21.6
 -3 -8 -8 183.28 15.4
 -3 -8 -8 173.38 17.8
 -3 -8 -8 164.88 12
 -3 -8 -8 190.38 16.6
 -3 -8 -8 193.58 13.7
 -3 -8 -8 157.28 15.1
 -3 -8 -8 196.08 13.5
 4 8 8 32.8 5.8
 4 8 8 28.4 7.5
 4 8 8 28.6 6.4
 4 8 8 42.6 5.2
 4 8 8 38.8 6
 4 8 8 35.2 7.9
 4 8 8 28.3 5.9
 4 8 8 35.5 7.2
 -4 -8 -8 40.7 7.6
 -4 -8 -8 33.7 3.7
 -4 -8 -8 42.9 5.3
 -4 -8 -8 29.7 8.2
 -4 -8 -8 26.2 9.8
 -4 -8 -8 44.7 7.3
 -4 -8 -8 34.4 7.2
 -4 -8 -8 32 7.7
 -4 -8 -8 40.7 7.6
 -4 -8 -8 37.5 5
 -4 -8 -8 43.3 5.7
 5 8 8 278.17 23.5
 5 8 8 286.37 19.2
 5 8 8 287.17 20.2
 5 8 8 278.87 19.3
 5 8 8 265.17 22.6
 5 8 8 260.97 21.5
 5 8 8 248.98 22.6
 5 8 8 299.27 20.1
 5 8 8 264.27 21.3
 -5 -8 -8 241.88 24.3
 -5 -8 -8 290.67 19.6
 -5 -8 -8 271.87 21.6
 -5 -8 -8 271.97 29.2
 -5 -8 -8 290.47 21.8
 -5 -8 -8 294.57 18.9
 -5 -8 -8 295.47 21.2
 -5 -8 -8 298.37 21.6
 -5 -8 -8 280.07 23.3
 6 8 8 8.9 4.9
 6 8 8 11.2 3.6
 6 8 8 18.7 6.5
 6 8 8 16.1 3.4
 6 8 8 14.6 6.9
 6 8 8 5.7 4.4
 6 8 8 17.7 4.8
 6 8 8 15.3 5.5
 -6 -8 -8 7.5 7.5
 -6 -8 -8 17 5.2
 -6 -8 -8 6.5 5.9
 -6 -8 -8 10.4 4
 -6 -8 -8 14.9 3.7
 -6 -8 -8 26 6.6
 -6 -8 -8 18 6.9
 -6 -8 -8 15.1 6.2
 7 8 8 -4 3
 7 8 8 0.7 6
 7 8 8 1.7 2.9
 7 8 8 4.4 3.8
 7 8 8 -1.2 1.9
 7 8 8 -5.7 4.2
 7 8 8 -1.6 3.5
 -7 -8 -8 -3.9 2.8
 -7 -8 -8 0.5 3.2
 -7 -8 -8 -1 2.5
 -7 -8 -8 -1.4 5.3
 -7 -8 -8 0.2 5
 -7 -8 -8 -0.1 4.8
 -7 -8 -8 -1.7 3.6
 -7 -8 -8 -3 2.3
 8 8 8 11.8 5.1
 8 8 8 13.1 6.2
 8 8 8 17 5.2
 8 8 8 11.9 7.3
 8 8 8 11.2 5.7
 8 8 8 7.4 5.7
 -8 -8 -8 9.7 7.9
 -8 -8 -8 7.9 6.3
 -8 -8 -8 8 6.9
 -8 -8 -8 14.8 4.5
 -8 -8 -8 18.3 5.7
 -8 -8 -8 16.5 4.5
 -8 -8 -8 5.2 3.7
 -8 -8 -8 16.1 4.9
 9 8 8 67.99 10.7
 9 8 8 54.49 12.4
 9 8 8 85.09 12.8
 9 8 8 42.3 9.7
 9 8 8 49.6 10.7
 -9 -8 -8 55.69 11.6
 -9 -8 -8 76.89 10.1
 -9 -8 -8 81.39 9.6
 -9 -8 -8 88.69 9.5
 -9 -8 -8 57.69 13.5
 -9 -8 -8 71.99 11.9
 -9 -8 -8 70.79 9.6
 10 8 8 67.89 13.5
 10 8 8 75.29 14.7
 10 8 8 97.39 14.1
 10 8 8 99.09 12.8
 10 8 8 59.19 11.7
 -10 -8 -8 114.39 10.9
 -10 -8 -8 90.59 15.6
 -10 -8 -8 90.69 16.5
 -10 -8 -8 104.79 12.1
 -10 -8 -8 99.29 10.7
 11 8 8 46.6 12
 11 8 8 44.8 10.9
 11 8 8 47.2 10.5
 11 8 8 49.7 9.2
 11 8 8 33.1 8.7
 -11 -8 -8 36 11
 -11 -8 -8 34.1 7.7
 -11 -8 -8 46.9 7.7
 12 8 8 9.1 7.9
 12 8 8 6.4 5.7
 12 8 8 -1.7 5.8
 12 8 8 -3 7
 12 8 8 5.1 6.6
 -12 -8 -8 -2.7 6.4
 -12 -8 -8 -0.9 4.7
 -12 -8 -8 -4.1 3
 13 8 8 94.79 18.2
 13 8 8 83.29 16
 13 8 8 67.79 13.9
 13 8 8 60.29 11.4
 13 8 8 85.89 17.4
 -13 -8 -8 69.99 15.5
 -13 -8 -8 75.29 12
 -13 -8 -8 89.89 9.9
 -8 9 9 16.1 6.8
 -8 9 9 11.5 6.5
 -8 9 9 -5.9 4.8
 -8 9 9 10.1 6.2
 8 -9 -9 14.8 10.8
 8 -9 -9 10.6 8.1
 8 -9 -9 1.3 8
 -7 9 9 41.7 9.6
 -7 9 9 33.8 9.4
 -7 9 9 39.8 9.3
 -7 9 9 41.7 9.3
 7 -9 -9 53.29 12.3
 7 -9 -9 33.6 9.2
 7 -9 -9 48.7 14.8
 7 -9 -9 65.49 13
 -6 9 9 40 10.3
 -6 9 9 29.1 7.4
 -6 9 9 36.4 7.6
 -6 9 9 34 8.5
 -6 9 9 26.3 7
 6 -9 -9 48.6 11
 6 -9 -9 21.9 7.8
 6 -9 -9 39.3 10.1
 6 -9 -9 20 8.2
 6 -9 -9 29.4 11.6
 -5 9 9 30 7.9
 -5 9 9 42.1 8.7
 -5 9 9 33.6 7.6
 -5 9 9 31.4 7.1
 -5 9 9 44.5 8.3
 -5 9 9 34 8
 5 -9 -9 29.3 8.2
 5 -9 -9 23.7 8.7
 5 -9 -9 32.6 9.6
 5 -9 -9 20.6 7.1
 5 -9 -9 25.1 10.7
 5 -9 -9 38.2 9.8
 5 -9 -9 27.5 8.4
 -4 9 9 323.87 25
 -4 9 9 342.57 24.9
 -4 9 9 327.17 23.9
 -4 9 9 275.07 29.1
 -4 9 9 339.27 24
 -4 9 9 321.47 25.9
 -4 9 9 313.37 24.3
 -4 9 9 343.77 26
 4 -9 -9 283.27 24.2
 4 -9 -9 325.57 25.1
 4 -9 -9 354.66 25.9
 4 -9 -9 356.16 26.9
 4 -9 -9 270.27 26.6
 4 -9 -9 332.97 30.1
 4 -9 -9 320.87 26.2
 -3 9 9 6.2 5
 -3 9 9 3.1 4.7
 -3 9 9 4.6 6.6
 -3 9 9 16.4 5.9
 -3 9 9 11 5.8
 -3 9 9 9.8 5.5
 -3 9 9 3.4 4.3
 -3 9 9 4.7 4
 3 -9 -9 5.6 6.2
 3 -9 -9 8.2 5.6
 3 -9 -9 11.6 6
 3 -9 -9 6.8 6.9
 3 -9 -9 3.2 7.4
 3 -9 -9 7.7 5.4
 3 -9 -9 5.4 5
 3 -9 -9 12.9 6.6
 -2 9 9 273.47 29.3
 -2 9 9 376.96 26.4
 -2 9 9 361.36 23.2
 -2 9 9 326.47 24
 -2 9 9 320.97 24.3
 -2 9 9 326.07 25.4
 -2 9 9 261.87 22.1
 -2 9 9 362.96 25.9
 -2 9 9 334.77 24
 2 -9 -9 343.27 28.1
 2 -9 -9 352.46 26.2
 2 -9 -9 308.47 27.6
 2 -9 -9 362.96 27.9
 2 -9 -9 269.77 23.9
 2 -9 -9 280.67 24.9
 2 -9 -9 362.76 25.8
 2 -9 -9 356.56 25.6
 2 -9 -9 314.27 25.4
 -1 9 9 42.2 8.4
 -1 9 9 27.3 5.1
 -1 9 9 25.9 7.3
 -1 9 9 34.3 7.4
 -1 9 9 18.3 8.8
 -1 9 9 26.5 5.3
 -1 9 9 38.2 7.7
 -1 9 9 36.4 6.3
 -1 9 9 42.5 8.2
 1 -9 -9 36 8.2
 1 -9 -9 26.5 8.7
 1 -9 -9 30 7.1
 1 -9 -9 21.8 8
 1 -9 -9 37.8 8
 1 -9 -9 35.2 9.9
 1 -9 -9 33.4 7.3
 1 -9 -9 22.2 6.9
 1 -9 -9 27.1 6.8
 0 9 9 16 8.6
 0 9 9 23.9 7.1
 0 9 9 19.8 4.3
 0 9 9 21.9 4.8
 0 9 9 21.3 4.3
 0 9 9 16.7 5.6
 0 9 9 30.7 7.9
 0 9 9 24.2 6.6
 0 9 9 17.6 4.6
 0 -9 -9 24.6 8.2
 0 -9 -9 18.9 6.8
 0 -9 -9 27.7 6.3
 0 -9 -9 41 9.5
 0 -9 -9 25.6 9.3
 0 -9 -9 18 5.5
 0 -9 -9 19.6 5.8
 0 -9 -9 25.4 7.7
 0 -9 -9 19.9 7
 1 9 9 -2.1 3
 1 9 9 -1.7 3.8
 1 9 9 1.9 2.7
 1 9 9 0.6 2
 1 9 9 -2.5 4.8
 1 9 9 -0.9 2.2
 1 9 9 -2.3 2.6
 1 9 9 -0.1 5.2
 1 9 9 -5.4 2.5
 -1 -9 -9 2.5 5.5
 -1 -9 -9 -1 3.1
 -1 -9 -9 -2.2 5.7
 -1 -9 -9 -3.8 3.5
 -1 -9 -9 -1.5 2.4
 -1 -9 -9 -3.7 4.4
 -1 -9 -9 2.5 5.7
 -1 -9 -9 -3.5 4.3
 -1 -9 -9 -3.6 3
 2 9 9 7.8 2.5
 2 9 9 2.3 2.3
 2 9 9 2.7 3.1
 2 9 9 3 3.5
 2 9 9 2.2 3.7
 2 9 9 1.9 4.3
 2 9 9 3.3 5.9
 2 9 9 -1.9 4.2
 2 9 9 9.3 4.6
 -2 -9 -9 2.5 2.7
 -2 -9 -9 2.3 4.7
 -2 -9 -9 5.6 5.4
 -2 -9 -9 1.7 5.5
 -2 -9 -9 -1.6 3.9
 -2 -9 -9 1.3 2.8
 -2 -9 -9 3.8 3.1
 -2 -9 -9 1.9 5.2
 -2 -9 -9 7.1 7.3
 3 9 9 58.89 10.7
 3 9 9 48.7 8.4
 3 9 9 51.89 5.6
 3 9 9 55.69 9.2
 3 9 9 44.6 7.9
 3 9 9 37.4 11.5
 3 9 9 46.6 9
 3 9 9 44.4 6.9
 3 9 9 59.09 8.3
 -3 -9 -9 59.69 7.1
 -3 -9 -9 51.79 9.8
 -3 -9 -9 45.6 8.8
 -3 -9 -9 54.59 13.7
 -3 -9 -9 71.99 11
 -3 -9 -9 47.4 10.2
 -3 -9 -9 59.09 6.2
 -3 -9 -9 67.19 7.8
 4 9 9 355.96 27.8
 4 9 9 410.76 28.3
 4 9 9 368.96 29.6
 4 9 9 378.26 26.1
 4 9 9 398.86 27.3
 4 9 9 315.67 28.2
 4 9 9 392.96 25.7
 -4 -9 -9 335.07 30.7
 -4 -9 -9 417.56 37
 -4 -9 -9 402.46 29.7
 -4 -9 -9 364.16 28.8
 -4 -9 -9 406.16 25.6
 -4 -9 -9 374.96 27.7
 5 9 9 2.3 2.9
 5 9 9 2.5 4.3
 5 9 9 7.6 5.1
 5 9 9 5 4.7
 5 9 9 2 4
 5 9 9 1.4 3.4
 -5 -9 -9 7.4 6.9
 -5 -9 -9 11.9 6.1
 -5 -9 -9 7.8 3.4
 -5 -9 -9 -2.4 4.8
 -5 -9 -9 10 5.7
 -5 -9 -9 -2.9 3.9
 -5 -9 -9 10 4
 6 9 9 -0.6 3.7
 6 9 9 4.6 3.3
 6 9 9 2.2 2.9
 6 9 9 13.8 5.7
 6 9 9 13.5 7.7
 6 9 9 17.4 6.4
 6 9 9 2.9 4.7
 -6 -9 -9 3.9 5.7
 -6 -9 -9 6.8 4
 -6 -9 -9 7.9 6.5
 -6 -9 -9 11.2 3.6
 -6 -9 -9 11.6 5.2
 -6 -9 -9 6.2 4.8
 -6 -9 -9 7.4 5.6
 7 9 9 78.49 13.2
 7 9 9 75.59 13.9
 7 9 9 85.59 12.8
 7 9 9 92.59 12.3
 7 9 9 78.09 13.2
 7 9 9 92.99 10.8
 -7 -9 -9 98.29 12.1
 -7 -9 -9 92.69 10.2
 -7 -9 -9 94.59 11.4
 -7 -9 -9 60.29 12
 -7 -9 -9 85.49 8.3
 -7 -9 -9 62.29 13.3
 8 9 9 24.9 7.7
 8 9 9 23.7 6.7
 8 9 9 27.9 8.6
 8 9 9 15.4 6.1
 8 9 9 10.6 7.8
 8 9 9 32.2 8.7
 -8 -9 -9 20.7 5.3
 -8 -9 -9 25.4 8.1
 -8 -9 -9 18.6 5.6
 -8 -9 -9 22 5.6
 -8 -9 -9 24.5 6.7
 -8 -9 -9 28.2 9.8
 9 9 9 111.19 16.4
 9 9 9 97.99 15.1
 9 9 9 89.79 13.1
 9 9 9 92.29 15.7
 9 9 9 105.89 15.2
 -9 -9 -9 115.69 10.8
 -9 -9 -9 119.19 11.1
 -9 -9 -9 89.89 11.3
 -9 -9 -9 131.49 14.2
 -9 -9 -9 96.49 15.4
 -9 -9 -9 103.49 17.8
 10 9 9 11.9 6.7
 10 9 9 1.3 4.3
 10 9 9 10.5 6
 10 9 9 -1.1 6.6
 10 9 9 6 5.1
 -10 -9 -9 5.7 3.5
 -10 -9 -9 -1.2 4.6
 -10 -9 -9 -0.2 6.3
 -10 -9 -9 5.3 4.7
 -10 -9 -9 -2.2 5.3
 11 9 9 60.19 14.8
 11 9 9 28.7 9.8
 11 9 9 28.7 8.6
 11 9 9 42.4 12.1
 11 9 9 28.3 8.7
 -11 -9 -9 46.8 8
 -11 -9 -9 35.1 10.6
 -11 -9 -9 35.5 11.9
 12 9 9 1.4 6.3
 12 9 9 -4 5.1
 12 9 9 3.5 5.7
 12 9 9 3.9 8
 -12 -9 -9 8 7.6
 -12 -9 -9 7.5 4.7
 -12 -9 -9 -3.3 7.1
 -7 10 10 4.8 5.5
 -7 10 10 1.4 6.2
 -7 10 10 1.6 3.8
 -7 10 10 -1.9 5.6
 -7 10 10 -9.8 3.9
 7 -10 -10 -2.2 6.6
 7 -10 -10 -0.9 7.9
 7 -10 -10 -6.3 8.2
 7 -10 -10 -2.5 6.1
 -6 10 10 169.18 16.7
 -6 10 10 169.68 17.1
 -6 10 10 202.68 18.5
 -6 10 10 169.58 21.1
 -6 10 10 167.48 20.9
 6 -10 -10 191.58 23.6
 6 -10 -10 207.38 23.4
 6 -10 -10 200.38 19.8
 6 -10 -10 137.39 22.9
 -5 10 10 -2 5.1
 -5 10 10 15.9 6.8
 -5 10 10 2.1 5.5
 -5 10 10 4.9 4.6
 -5 10 10 0.9 5.2
 5 -10 -10 2.9 6.8
 5 -10 -10 -2 9.6
 5 -10 -10 7.2 7.6
 5 -10 -10 1.1 5.6
 5 -10 -10 -1 5.8
 -4 10 10 66.09 11.1
 -4 10 10 99.59 14.1
 -4 10 10 48.9 11.5
 -4 10 10 87.09 11.3
 -4 10 10 103.09 15.6
 -4 10 10 82.99 11.9
 -4 10 10 89.49 12.3
 4 -10 -10 77.99 15
 4 -10 -10 74.29 13
 4 -10 -10 94.19 14.5
 4 -10 -10 114.39 16.1
 4 -10 -10 91.79 13.6
 4 -10 -10 76.49 16.2
 -3 10 10 5.4 4.4
 -3 10 10 1.9 4.8
 -3 10 10 8.4 5.9
 -3 10 10 0.9 4.4
 -3 10 10 14.9 5.9
 -3 10 10 0.1 4
 -3 10 10 6.8 4.8
 -3 10 10 -0.8 6.1
 3 -10 -10 1.7 5.5
 3 -10 -10 -3.1 4.7
 3 -10 -10 2.7 6.3
 3 -10 -10 7.2 8.5
 3 -10 -10 -3.5 5.5
 -2 10 10 255.87 20.2
 -2 10 10 281.77 22.3
 -2 10 10 269.77 23
 -2 10 10 241.58 20.5
 -2 10 10 269.67 22.3
 -2 10 10 198.18 25.5
 -2 10 10 234.88 20.4
 -2 10 10 270.57 19.3
 2 -10 -10 226.98 21.5
 2 -10 -10 283.17 22.3
 2 -10 -10 255.47 24.7
 2 -10 -10 287.07 25.3
 2 -10 -10 268.87 23.1
 2 -10 -10 286.17 22.6
 2 -10 -10 212.58 21.7
 2 -10 -10 268.57 25.3
 -1 10 10 14.7 4.5
 -1 10 10 11.2 4.6
 -1 10 10 6.1 5
 -1 10 10 4.6 4.5
 -1 10 10 6.6 4.7
 -1 10 10 3 7.2
 -1 10 10 15.5 7
 -1 10 10 7.5 7.9
 1 -10 -10 6.1 7.4
 1 -10 -10 6.4 4.6
 1 -10 -10 11.1 8.1
 1 -10 -10 1.1 7.7
 1 -10 -10 16.9 6.5
 1 -10 -10 7.2 5.3
 1 -10 -10 18 7.3
 1 -10 -10 16.6 7.2
 0 10 10 18.9 4.4
 0 10 10 8.1 4.2
 0 10 10 31.6 7.9
 0 10 10 19.9 5.6
 0 10 10 24.4 8.1
 0 10 10 16.7 8.8
 0 10 10 23.8 6
 0 -10 -10 21.3 7.9
 0 -10 -10 20.1 9.1
 0 -10 -10 22.2 6.5
 0 -10 -10 31.5 9.6
 0 -10 -10 21.6 8.3
 0 -10 -10 22.7 7.8
 0 -10 -10 32.8 7.1
 0 -10 -10 24.2 7.5
 1 10 10 2.4 3.2
 1 10 10 2.4 5.6
 1 10 10 1.7 2.4
 1 10 10 2 6.1
 1 10 10 -1.9 3.3
 1 10 10 4.5 4
 -1 -10 -10 9.8 5.8
 -1 -10 -10 0.2 5.1
 -1 -10 -10 18.5 7.4
 -1 -10 -10 -0.5 5.5
 -1 -10 -10 5.7 4.1
 -1 -10 -10 0.2 5.9
 -1 -10 -10 2.2 4.1
 -1 -10 -10 -1.4 4.8
 2 10 10 15.8 7.2
 2 10 10 16.4 5.6
 2 10 10 16.1 4.7
 2 10 10 17.3 6.6
 2 10 10 11.4 3.1
 2 10 10 14.5 5.6
 -2 -10 -10 19.9 6.9
 -2 -10 -10 33.7 8.4
 -2 -10 -10 21.4 5.6
 -2 -10 -10 14.4 8.3
 -2 -10 -10 14.3 7.2
 -2 -10 -10 10.5 7.8
 -2 -10 -10 19.1 7.7
 3 10 10 15.5 5.9
 3 10 10 15 7.1
 3 10 10 13.9 4.9
 3 10 10 12.5 5.1
 3 10 10 11 5.1
 3 10 10 10.5 5.5
 -3 -10 -10 12.1 7
 -3 -10 -10 13.6 7.9
 -3 -10 -10 7.2 7.1
 -3 -10 -10 9.3 6.6
 -3 -10 -10 18.7 7
 -3 -10 -10 13.9 4.9
 4 10 10 252.07 20.4
 4 10 10 280.97 22.5
 4 10 10 247.28 23.2
 4 10 10 263.17 22.3
 4 10 10 277.27 24.8
 4 10 10 316.57 22.4
 -4 -10 -10 306.97 20.3
 -4 -10 -10 278.87 30.6
 -4 -10 -10 303.47 24.5
 -4 -10 -10 275.27 22.7
 -4 -10 -10 270.97 26.2
 -4 -10 -10 272.17 24
 5 10 10 104.59 11.9
 5 10 10 72.09 12.1
 5 10 10 49.8 11.1
 5 10 10 68.19 11.7
 5 10 10 90.89 12.3
 5 10 10 68.29 9.3
 -5 -10 -10 70.49 20.2
 -5 -10 -10 65.49 8.5
 -5 -10 -10 76.69 11.8
 -5 -10 -10 66.99 13.7
 -5 -10 -10 73.59 12.4
 -5 -10 -10 100.09 13.7
 6 10 10 270.87 22.9
 6 10 10 258.67 23.8
 6 10 10 261.77 20.5
 6 10 10 290.57 24.5
 6 10 10 253.67 22.2
 -6 -10 -10 254.07 21.3
 -6 -10 -10 245.98 22.4
 -6 -10 -10 239.58 25.8
 -6 -10 -10 322.77 25.6
 -6 -10 -10 264.87 19.7
 7 10 10 75.59 13.9
 7 10 10 72.59 13.1
 7 10 10 86.29 15.8
 7 10 10 80.29 12.8
 7 10 10 92.49 12.9
 -7 -10 -10 58.59 13.4
 -7 -10 -10 105.89 12.2
 -7 -10 -10 77.99 11.9
 -7 -10 -10 74.89 13.8
 -7 -10 -10 75.99 9.6
 8 10 10 1.6 5.1
 8 10 10 18.5 7.5
 8 10 10 16.6 6.2
 8 10 10 12.5 6.3
 8 10 10 9.2 7.8
 -8 -10 -10 6.6 4.8
 -8 -10 -10 5.3 4.3
 -8 -10 -10 1 6.6
 -8 -10 -10 4.3 7.1
 -8 -10 -10 0.7 5.9
 9 10 10 -2.9 4.5
 9 10 10 6.4 5.7
 9 10 10 15.2 8.9
 9 10 10 9.4 6.6
 9 10 10 0.9 5
 -9 -10 -10 12.4 5.6
 -9 -10 -10 4.3 5
 -9 -10 -10 8.2 7.3
 -9 -10 -10 5.3 7.3
 10 10 10 75.09 15.4
 10 10 10 96.49 14.7
 10 10 10 87.79 13.1
 10 10 10 55.59 13.4
 10 10 10 63.79 12.8
 -10 -10 -10 63.89 14
 -10 -10 -10 61.69 9.2
 -10 -10 -10 73.29 14.7
 -10 -10 -10 76.69 10.9
 11 10 10 3 6.3
 11 10 10 -0.6 5.1
 11 10 10 -9 6.5
 11 10 10 -5.7 5.3
 -11 -10 -10 -3.9 7.3
 -11 -10 -10 1.1 3.8
 -11 -10 -10 8.7 5.1
 -11 -10 -10 8.4 8.2
 12 10 10 7.3 6.7
 -6 11 11 -4.3 4.9
 -6 11 11 -1.5 3.9
 -6 11 11 10 6.5
 6 -11 -11 -1.1 8.3
 6 -11 -11 5.4 8.5
 6 -11 -11 -3.9 7.1
 -5 11 11 13.1 7.3
 -5 11 11 4.3 5.2
 -5 11 11 -1.4 4.9
 -5 11 11 3.6 5.3
 5 -11 -11 4 6.9
 5 -11 -11 0.9 8.8
 5 -11 -11 2.9 7.3
 5 -11 -11 5.8 8.5
 -4 11 11 19.4 8.4
 -4 11 11 33.2 8.5
 -4 11 11 20.1 6.8
 -4 11 11 15.6 6.7
 -4 11 11 23.2 8.6
 4 -11 -11 18.5 8.3
 4 -11 -11 4.9 7
 4 -11 -11 19.2 9.2
 4 -11 -11 20.9 9
 4 -11 -11 29.5 11.6
 -3 11 11 16 7.1
 -3 11 11 27.8 6.8
 -3 11 11 28.5 8.2
 -3 11 11 29.5 9.8
 -3 11 11 16.9 6.8
 3 -11 -11 21.7 8.1
 3 -11 -11 45.7 12.9
 3 -11 -11 24.4 9.2
 3 -11 -11 16 9.2
 3 -11 -11 25.8 8.3
 -2 11 11 5.8 4.6
 -2 11 11 1.5 5.3
 -2 11 11 10 5.8
 -2 11 11 2.7 5.1
 -2 11 11 13.4 7.1
 2 -11 -11 3.9 6.8
 2 -11 -11 -1.3 6.9
 2 -11 -11 5.9 9.2
 2 -11 -11 9.7 7.4
 2 -11 -11 4.3 6.8
 2 -11 -11 0 4.8
 -1 11 11 77.19 12.7
 -1 11 11 96.49 13.6
 -1 11 11 37.5 9.1
 -1 11 11 61.09 10.7
 -1 11 11 67.79 9
 1 -11 -11 76.39 13.2
 1 -11 -11 68.09 15.1
 1 -11 -11 69.99 12.7
 1 -11 -11 87.49 14.9
 1 -11 -11 80.59 12.1
 1 -11 -11 83.19 15.4
 1 -11 -11 71.69 14.7
 0 11 11 4.7 4.8
 0 11 11 0.7 4.6
 0 11 11 7.7 6.5
 0 11 11 2.9 3.5
 0 -11 -11 2.7 6.8
 0 -11 -11 21.6 10
 0 -11 -11 4.6 6.6
 0 -11 -11 4 5.6
 0 -11 -11 8.8 5.1
 0 -11 -11 -7.4 6
 0 -11 -11 0.2 7
 1 11 11 3.6 4.6
 1 11 11 1.6 4.7
 1 11 11 -5 4.1
 1 11 11 2.5 2.7
 -1 -11 -11 -1.4 3.3
 -1 -11 -11 3.8 6
 -1 -11 -11 2.7 8
 -1 -11 -11 -8.4 6
 -1 -11 -11 -3.3 6.5
 -1 -11 -11 2.4 6.1
 -1 -11 -11 1.4 5.9
 2 11 11 6.9 5.2
 2 11 11 17 6.1
 2 11 11 10.7 6.1
 2 11 11 6 5.1
 2 11 11 11 6
 2 11 11 14.6 7.5
 -2 -11 -11 4 7
 -2 -11 -11 9.6 6.2
 -2 -11 -11 26.2 8.7
 -2 -11 -11 13.8 5
 -2 -11 -11 8.4 8.9
 -2 -11 -11 21.4 9
 3 11 11 45.5 10.1
 3 11 11 36.5 7.8
 3 11 11 46.7 10
 3 11 11 44.7 10
 3 11 11 50.09 10
 3 11 11 52.09 11.4
 -3 -11 -11 67.29 12.3
 -3 -11 -11 59.89 12.9
 -3 -11 -11 67.79 13.3
 -3 -11 -11 51.69 10.1
 4 11 11 1.1 4.6
 4 11 11 -6 3.1
 4 11 11 1.9 3.9
 4 11 11 -8.1 4.2
 4 11 11 -7.3 4
 4 11 11 -2.6 4.8
 -4 -11 -11 -1.1 4.9
 -4 -11 -11 0.2 6.7
 -4 -11 -11 -8.9 5.3
 -4 -11 -11 -2.8 6.4
 5 11 11 141.29 17
 5 11 11 94.49 15.6
 5 11 11 105.89 15.7
 5 11 11 109.39 15.9
 -5 -11 -11 133.49 16.9
 -5 -11 -11 135.79 16.8
 -5 -11 -11 128.89 15.4
 -5 -11 -11 106.09 18
 -5 -11 -11 111.39 11.6
 6 11 11 -1.5 5
 6 11 11 3.2 5.4
 6 11 11 7.6 6.1
 6 11 11 0.4 5.6
 -6 -11 -11 1.8 4.9
 -6 -11 -11 -5.2 6.3
 -6 -11 -11 3.6 3.8
 -6 -11 -11 1.7 6.6
 -6 -11 -11 9 7.2
 7 11 11 0.9 5.2
 7 11 11 16.8 7.4
 7 11 11 4.3 5.8
 7 11 11 0.1 5.2
 -7 -11 -11 2.4 4
 -7 -11 -11 4.3 7.4
 -7 -11 -11 -1.4 4.1
 -7 -11 -11 -0.7 7
 -7 -11 -11 1.1 6.1
 8 11 11 21.8 8.3
 8 11 11 22.2 8
 8 11 11 27 8.3
 8 11 11 22.3 8
 -8 -11 -11 24 9.5
 -8 -11 -11 27.4 8.5
 -8 -11 -11 19.1 6.2
 -8 -11 -11 19.5 10.3
 9 11 11 32.4 10.6
 9 11 11 59.89 11.8
 9 11 11 43.1 11.2
 9 11 11 35 9.3
 -9 -11 -11 34.6 8.1
 -9 -11 -11 35.1 8.8
 -9 -11 -11 25.2 10.7
 -9 -11 -11 24.5 11
 10 11 11 13.4 7.8
 10 11 11 9.2 7.8
 10 11 11 19.7 7.9
 10 11 11 18.2 7.4
 10 11 11 -4.4 7.4
 -10 -11 -11 3.7 8.9
 -10 -11 -11 18.9 6.8
 -10 -11 -11 -2.4 6.7
 -10 -11 -11 11.2 5.1
 -4 12 12 -2.6 5
 -4 12 12 0.7 5.3
 -4 12 12 3.7 5.7
 4 -12 -12 -2.7 8.5
 4 -12 -12 8.1 7
 4 -12 -12 -1.4 6.6
 4 -12 -12 0.1 7.3
 -3 12 12 44 12.1
 -3 12 12 14 6.9
 -3 12 12 20.5 6.8
 -3 12 12 36 10
 3 -12 -12 13.4 9
 3 -12 -12 27.5 10.6
 3 -12 -12 22.5 11.5
 3 -12 -12 37.5 10.2
 -2 12 12 123.99 17.2
 -2 12 12 159.48 19.6
 -2 12 12 164.48 19.7
 2 -12 -12 156.78 21
 2 -12 -12 153.18 21.4
 2 -12 -12 122.69 20.3
 2 -12 -12 185.88 18.1
 2 -12 -12 146.99 18.3
 -1 12 12 2.8 5.1
 -1 12 12 6.4 5.1
 -1 12 12 2.1 7.1
 1 -12 -12 7.1 6.1
 1 -12 -12 4.2 6.3
 1 -12 -12 6 7
 1 -12 -12 0.4 6.7
 1 -12 -12 18 9.7
 0 12 12 2.3 4.2
 0 12 12 2.7 6
 0 12 12 4.3 5.8
 0 -12 -12 11.5 7.9
 0 -12 -12 2.5 8
 0 -12 -12 -0.6 8.9
 0 -12 -12 -1.3 6.6
 0 -12 -12 6 6.3
 0 -12 -12 7.2 5.6
 1 12 12 -2.4 3.5
 1 12 12 -5.8 5.1
 1 12 12 -3.8 5.7
 1 12 12 7.6 5.4
 -1 -12 -12 0.6 8
 -1 -12 -12 -13.1 5.3
 -1 -12 -12 -7.5 6.4
 -1 -12 -12 -6 5.2
 -1 -12 -12 -3.3 4.5
 -1 -12 -12 -4.4 7.5
 2 12 12 35 8.7
 2 12 12 51.49 10.6
 2 12 12 24.7 8.6
 2 12 12 35.4 10.4
 2 12 12 50.89 10.8
 -2 -12 -12 51.99 11.4
 -2 -12 -12 38.3 11
 -2 -12 -12 36.7 12
 -2 -12 -12 45.5 12.1
 3 12 12 67.99 10.8
 3 12 12 50.99 11
 3 12 12 66.39 12.2
 3 12 12 51.49 10.9
 3 12 12 63.29 13.6
 -3 -12 -12 51.19 13.4
 -3 -12 -12 58.49 11.4
 -3 -12 -12 53.69 12.8
 -3 -12 -12 65.19 13
 4 12 12 -6.2 5.1
 4 12 12 -2.9 4
 4 12 12 2.6 6
 4 12 12 5.3 5.3
 -4 -12 -12 3.5 6.1
 -4 -12 -12 4.3 7.2
 -4 -12 -12 -0.9 6.9
 -4 -12 -12 -5.9 6.6
 5 12 12 28 9.2
 5 12 12 24.7 9
 5 12 12 38.2 8.9
 5 12 12 28 9.5
 -5 -12 -12 41.9 10
 -5 -12 -12 16 8.7
 -5 -12 -12 22.6 9.1
 -5 -12 -12 22.3 10.1
 6 12 12 -1.2 5
 6 12 12 5.2 6.8
 6 12 12 1.6 5.5
 6 12 12 0.8 5.4
 -6 -12 -12 5.5 6
 -6 -12 -12 -3.4 7.2
 -6 -12 -12 0.2 7.5
 -6 -12 -12 11.2 8.7
 7 12 12 46.8 10.7
 7 12 12 52.89 12.4
 7 12 12 55.29 11.5
 7 12 12 60.89 13
 -7 -12 -12 72.99 11.9
 -7 -12 -12 63.69 12.3
 -7 -12 -12 59.69 13.4
 -7 -12 -12 51.99 13.4
 8 12 12 24.4 9.3
 8 12 12 16 7.3
 8 12 12 18.2 8.6
 8 12 12 39.3 10.4
 -8 -12 -12 25.9 7.9
 -8 -12 -12 37.9 8.1
 -8 -12 -12 8.9 8.5
 -8 -12 -12 34 12.1
 9 12 12 30.7 11.3
 9 12 12 27 10.4
 9 12 12 44.8 10.9
 9 12 12 52.79 12.8
 -9 -12 -12 72.69 10.8
 -9 -12 -12 36.2 8.4
 -9 -12 -12 42.5 14
 -9 -12 -12 50.49 13.4
 -1 13 13 81.99 15.2
 -1 13 13 92.29 14.7
 -1 13 13 105.39 17
 1 -13 -13 75.89 14.7
 1 -13 -13 96.19 16.5
 1 -13 -13 85.59 16.9
 1 -13 -13 123.39 15.9
 1 -13 -13 100.89 17.4
 0 13 13 25.3 9.5
 0 13 13 10.7 6.6
 0 13 13 9.1 7.5
 0 -13 -13 3.7 8.7
 0 -13 -13 17.4 9.2
 0 -13 -13 13.2 6.6
 0 -13 -13 28.5 9.8
 0 -13 -13 24.9 14.4
 1 13 13 16 7.9
 1 13 13 14 7.3
 1 13 13 7.3 6.5
 1 13 13 23.7 9.1
 1 13 13 12.7 7.1
 -1 -13 -13 12.6 8.5
 -1 -13 -13 -1.6 8.4
 -1 -13 -13 20.9 11.5
 -1 -13 -13 12.2 6.8
 2 13 13 9.1 6.3
 2 13 13 0.6 6.2
 2 13 13 1.2 4.6
 2 13 13 -0.6 6
 2 13 13 -0.3 5.4
 -2 -13 -13 -1.2 7.9
 -2 -13 -13 -0.5 5.7
 -2 -13 -13 18.9 10.8
 -2 -13 -13 -6.7 7.3
 3 13 13 1.8 6
 3 13 13 4.9 6.3
 3 13 13 -6.4 4.1
 3 13 13 7.4 7.5
 -3 -13 -13 -8.7 7.4
 -3 -13 -13 -5.8 5.9
 -3 -13 -13 6 8
 -3 -13 -13 -9.2 7.4
 4 13 13 3.5 6.1
 4 13 13 8.4 6.6
 4 13 13 -1.2 5.2
 4 13 13 -7.4 4.6
 -4 -13 -13 -1.8 7.7
 -4 -13 -13 7.1 6.9
 -4 -13 -13 -10 7.6
 -4 -13 -13 -5.3 7.4
 5 13 13 5.2 6.8
 5 13 13 2.8 6.5
 5 13 13 -0.8 5.2
 5 13 13 13 8.2
 -5 -13 -13 -12.1 6.9
 -5 -13 -13 -6.3 7.3
 -5 -13 -13 11 8.8
 -5 -13 -13 5 6.1
 6 13 13 23.9 8.9
 6 13 13 33 9.7
 6 13 13 38.7 12
 6 13 13 35.3 11
 -6 -13 -13 18.8 9.7
 -6 -13 -13 32 10.3
 -6 -13 -13 42.8 9.9
 -6 -13 -13 42.8 13.1
 7 13 13 4.1 6.4
 7 13 13 1.8 7
 7 13 13 12.4 8.8
 7 13 13 10.9 7.2
 -7 -13 -13 -3.3 7.9
 -7 -13 -13 17.1 6.4
 -7 -13 -13 1.5 4.8
 -7 -13 -13 -6.1 8.1
 -5 -13 -14 9.1 8.2
 -5 -13 -14 -4 7.4
 -5 -13 -14 -2.5 8.1
 -5 -13 -14 17.9 8.3
 5 13 14 8.7 6.8
 5 13 14 1.9 7.2
 5 13 14 3.1 6.1
 5 13 14 6.8 7
 -4 -13 -14 -7.9 6
 -4 -13 -14 -1.1 8.1
 -4 -13 -14 -4.3 8
 -4 -13 -14 -0.3 7.5
 4 13 14 -3.5 5.6
 4 13 14 1 6.7
 4 13 14 7.4 8.9
 4 13 14 10.2 7
 -3 -13 -14 1.6 7
 -3 -13 -14 11.7 9.1
 -3 -13 -14 -9.8 7.5
 -3 -13 -14 -1.7 8.1
 3 13 14 7.6 7.1
 3 13 14 -1.9 6.2
 3 13 14 4.1 6.6
 3 13 14 1.1 6.5
 -2 -13 -14 10.4 10.7
 -2 -13 -14 30.1 12.4
 -2 -13 -14 12.2 7.4
 -2 -13 -14 9.5 9.4
 2 13 14 18.1 7.5
 2 13 14 29.9 9.5
 2 13 14 14.9 7.5
 2 13 14 6.3 8.2
 -1 -13 -14 104.89 17.3
 -1 -13 -14 63.89 15.1
 -1 -13 -14 118.29 18.3
 1 13 14 162.98 20.5
 1 13 14 93.59 14.7
 1 13 14 111.59 17.2
 1 13 14 115.09 16.2
 -8 -12 -13 -1.9 7.8
 -8 -12 -13 21.7 7.7
 -8 -12 -13 19.1 9.8
 -8 -12 -13 19.6 7.2
 8 12 13 27.8 10
 8 12 13 22.5 8.4
 8 12 13 13.8 8.3
 8 12 13 10.7 7.4
 -7 -12 -13 8.2 8.8
 -7 -12 -13 28.8 9.4
 -7 -12 -13 7.1 9
 -7 -12 -13 18.6 8
 7 12 13 5.6 5.5
 7 12 13 7.3 6.8
 7 12 13 19.4 7.3
 7 12 13 3.7 6.9
 -6 -12 -13 203.38 25
 -6 -12 -13 214.28 20.9
 -6 -12 -13 216.88 23.6
 -6 -12 -13 212.28 24.1
 6 12 13 176.78 23.9
 6 12 13 200.88 20.6
 6 12 13 179.58 20
 6 12 13 205.68 25
 -5 -12 -13 1.4 8.2
 -5 -12 -13 3.5 6.9
 -5 -12 -13 6.1 7.9
 -5 -12 -13 1.3 8.3
 5 12 13 -1.6 6.5
 5 12 13 -0.7 4.7
 5 12 13 -1 4.8
 5 12 13 3.2 5.3
 -4 -12 -13 -4.2 7.3
 -4 -12 -13 5.7 8.9
 -4 -12 -13 6.6 6.9
 -4 -12 -13 0.3 7.1
 4 12 13 14.3 7.9
 4 12 13 -3.8 5.6
 4 12 13 -1.9 5.2
 4 12 13 0.6 5.2
 -3 -12 -13 19.9 9.6
 -3 -12 -13 8.9 8.6
 -3 -12 -13 16.9 9.2
 -3 -12 -13 35.1 10.2
 3 12 13 9.8 6.2
 3 12 13 25.4 8.7
 3 12 13 10 7.8
 3 12 13 11.2 6.6
 -2 -12 -13 -9.4 6.2
 -2 -12 -13 5.2 8.5
 -2 -12 -13 3.6 6
 -2 -12 -13 4.1 7.8
 2 12 13 -0.6 4.4
 2 12 13 3.7 5.4
 2 12 13 3.1 5.6
 2 12 13 8.7 6.8
 2 12 13 0.8 5
 -1 -12 -13 -5.6 6.4
 -1 -12 -13 1.4 5.1
 -1 -12 -13 3.3 5.6
 -1 -12 -13 -9.7 6.4
 -1 -12 -13 0.9 8.5
 1 12 13 -1.5 5.1
 1 12 13 -0.7 4.7
 1 12 13 -2.4 4.9
 1 12 13 -1.7 5.7
 0 -12 -13 1.4 6.5
 0 -12 -13 -1.2 4.8
 0 -12 -13 -12.4 5.9
 0 -12 -13 2.5 7.6
 0 -12 -13 -1.9 9.5
 0 -12 -13 -7.7 8
 0 12 13 0.8 5.1
 0 12 13 0 5.5
 0 12 13 10.5 7.3
 1 -12 -13 -2 5.5
 1 -12 -13 -1.3 6.9
 1 -12 -13 14.1 8.1
 1 -12 -13 12.6 10.1
 1 -12 -13 3.1 7.5
 -1 12 13 4.2 5.5
 -1 12 13 5.7 6.7
 -1 12 13 9.1 7.6
 2 -12 -13 5.6 6.4
 2 -12 -13 9.5 7.5
 2 -12 -13 -2.8 8.3
 2 -12 -13 13.3 8
 2 -12 -13 3.8 7.5
 -2 12 13 11 7
 -2 12 13 3.6 4.6
 -2 12 13 1.4 7.2
 3 -12 -13 13.8 7.3
 3 -12 -13 3.6 8.5
 3 -12 -13 6.8 9.4
 -3 12 13 1.9 5.1
 -3 12 13 -1.6 4.8
 -3 12 13 9 7.3
 -10 -11 -12 50.59 9.8
 -10 -11 -12 48.5 14.4
 -10 -11 -12 32.9 11
 -10 -11 -12 63.79 10.1
 10 11 12 33 10.2
 10 11 12 45 12
 10 11 12 41.6 11.6
 10 11 12 64.99 14.9
 -9 -11 -12 30.8 7.6
 -9 -11 -12 7.9 9.5
 -9 -11 -12 24.6 10.7
 -9 -11 -12 26.3 7.3
 9 11 12 18 10.3
 9 11 12 29 10.6
 9 11 12 25.8 8.3
 9 11 12 17.7 8.8
 9 11 12 32.7 9.7
 -8 -11 -12 0.3 4.6
 -8 -11 -12 -6.7 6.1
 -8 -11 -12 -3 5.7
 -8 -11 -12 -3.8 7
 8 11 12 0.6 5.2
 8 11 12 -3.3 6
 8 11 12 2.9 6.5
 8 11 12 2.9 5.8
 -7 -11 -12 50.19 11.1
 -7 -11 -12 46.6 12.5
 -7 -11 -12 53.19 13.2
 -7 -11 -12 45.6 9.7
 7 11 12 23.8 8.9
 7 11 12 48.3 11.1
 7 11 12 65.49 11.9
 7 11 12 61.39 12.3
 -6 -11 -12 6.3 8.3
 -6 -11 -12 1.6 5.3
 -6 -11 -12 5.7 6.6
 -6 -11 -12 -2.2 6.6
 6 11 12 7.5 6.9
 6 11 12 -0.7 5.1
 6 11 12 -3.4 4.9
 6 11 12 -5.5 4.8
 -5 -11 -12 552.54 44.7
 -5 -11 -12 546.35 36.7
 -5 -11 -12 599.64 42.2
 -5 -11 -12 569.24 42.3
 -5 -11 -12 609.04 40.3
 5 11 12 483.25 39.5
 5 11 12 511.85 41
 5 11 12 531.95 42
 5 11 12 562.04 40
 -4 -11 -12 54.89 13.3
 -4 -11 -12 76.59 14.2
 -4 -11 -12 71.09 13.7
 -4 -11 -12 79.19 12.6
 4 11 12 80.69 13.8
 4 11 12 67.29 12.3
 4 11 12 74.69 12.9
 4 11 12 89.59 13.6
 4 11 12 63.79 12.8
 -3 -11 -12 30.6 9.8
 -3 -11 -12 17.2 7.2
 -3 -11 -12 18.4 8.8
 -3 -11 -12 9.6 8
 3 11 12 20.2 8.8
 3 11 12 16.5 7
 3 11 12 14.4 6.9
 3 11 12 10.6 5.8
 3 11 12 17.1 7.4
 -2 -11 -12 5.3 7.7
 -2 -11 -12 0 6.1
 -2 -11 -12 -4.7 3.8
 -2 -11 -12 10 6.6
 -2 -11 -12 -8.8 6.1
 2 11 12 1.6 5.3
 2 11 12 3.5 4.6
 2 11 12 1.7 4.7
 2 11 12 3.3 5.3
 -1 -11 -12 16 8.3
 -1 -11 -12 5.9 7.7
 -1 -11 -12 37.9 9.2
 -1 -11 -12 27.3 7
 -1 -11 -12 25 10.2
 -1 -11 -12 21.5 8.7
 1 11 12 28.6 8.3
 1 11 12 21.9 9.1
 1 11 12 40 10.2
 1 11 12 31.3 8.2
 0 -11 -12 30 10.4
 0 -11 -12 42.7 10.7
 0 -11 -12 34.7 10.1
 0 -11 -12 14 11.5
 0 -11 -12 23.3 8.9
 0 -11 -12 34.6 8.2
 0 -11 -12 39.1 10.1
 0 11 12 33.8 9.7
 0 11 12 20.8 6.9
 0 11 12 16.2 7.7
 1 -11 -12 38.5 10.8
 1 -11 -12 35.6 10.3
 1 -11 -12 47.6 11.6
 1 -11 -12 37.1 9.1
 1 -11 -12 34.7 11.8
 1 -11 -12 35.9 11.4
 1 -11 -12 40.6 11
 -1 11 12 57.49 11.4
 -1 11 12 63.49 12.8
 -1 11 12 45.1 9.8
 -1 11 12 38.1 8.8
 2 -11 -12 44 10.5
 2 -11 -12 59.89 13.5
 2 -11 -12 44.2 9.9
 2 -11 -12 52.69 11.2
 2 -11 -12 32.8 9.5
 2 -11 -12 45.1 12.6
 -2 11 12 34.5 9.5
 -2 11 12 38.3 7.3
 -2 11 12 53.49 11
 -2 11 12 27.1 7.6
 3 -11 -12 31.1 9.1
 3 -11 -12 33.2 12
 3 -11 -12 34.4 9.6
 3 -11 -12 29.5 10.8
 -3 11 12 25 9.4
 -3 11 12 35.8 9.4
 -3 11 12 37.4 9
 -3 11 12 19.2 7.5
 -3 11 12 21.6 7
 4 -11 -12 10.1 8.6
 4 -11 -12 6 8.1
 4 -11 -12 12.2 10.5
 4 -11 -12 9.1 7.1
 -4 11 12 14 6.9
 -4 11 12 8.3 6.5
 -4 11 12 1.2 4.9
 -4 11 12 0.7 5
 -4 11 12 13.6 7.3
 5 -11 -12 36 11.7
 5 -11 -12 10.9 8.6
 5 -11 -12 30.3 13.6
 5 -11 -12 30.8 9.5
 -5 11 12 15 7.3
 -5 11 12 21.5 7.9
 -5 11 12 26.2 8.6
 -11 -10 -11 14.4 5.1
 -11 -10 -11 22.6 7
 -11 -10 -11 8.3 7.8
 -11 -10 -11 17.3 9.5
 11 10 11 11.1 9.7
 11 10 11 6 7.7
 11 10 11 10.3 7.9
 11 10 11 4.4 6.5
 -10 -10 -11 194.18 16
 -10 -10 -11 123.39 20
 -10 -10 -11 187.38 17.1
 -10 -10 -11 193.68 24.2
 10 10 11 171.38 21.6
 10 10 11 155.48 21.5
 10 10 11 162.48 22
 10 10 11 161.98 21.9
 -9 -10 -11 3.9 5.3
 -9 -10 -11 1.9 7.2
 -9 -10 -11 2 4.1
 -9 -10 -11 1.3 7.4
 9 10 11 3 6
 9 10 11 2.8 5.5
 9 10 11 -1.6 6
 9 10 11 -5.1 5.5
 9 10 11 1.7 5.2
 -8 -10 -11 2.7 7.2
 -8 -10 -11 9 5.4
 -8 -10 -11 5.7 5.8
 -8 -10 -11 9.1 7.8
 8 10 11 11 8.5
 8 10 11 7.1 7.2
 8 10 11 17.1 7.8
 8 10 11 17.2 7.4
 8 10 11 6.9 5.2
 -7 -10 -11 9.5 5.6
 -7 -10 -11 3.1 6.7
 -7 -10 -11 6.2 6.3
 -7 -10 -11 9.1 7.4
 -7 -10 -11 3.5 3.6
 7 10 11 13.6 6.1
 7 10 11 5.8 6.1
 7 10 11 1.9 5.8
 7 10 11 14.9 6.6
 7 10 11 8.3 6.9
 -6 -10 -11 364.56 25.5
 -6 -10 -11 337.47 32.5
 -6 -10 -11 364.86 31.1
 -6 -10 -11 396.76 28.1
 -6 -10 -11 412.46 29.6
 6 10 11 373.96 28.4
 6 10 11 350.86 30.2
 6 10 11 324.17 29.5
 6 10 11 332.07 28.3
 -5 -10 -11 7.9 7.2
 -5 -10 -11 1.4 5.2
 -5 -10 -11 10.3 7.1
 -5 -10 -11 5 6.2
 -5 -10 -11 8.2 4.5
 5 10 11 5.9 5.8
 5 10 11 8.6 5.7
 5 10 11 7.2 5.3
 5 10 11 8.3 6.5
 5 10 11 0.2 4.7
 -4 -10 -11 49.99 11
 -4 -10 -11 52.69 8
 -4 -10 -11 38.4 16.9
 -4 -10 -11 57.69 11.8
 -4 -10 -11 33.3 10.2
 -4 -10 -11 49.9 9.5
 4 10 11 56.99 9.7
 4 10 11 67.99 10.1
 4 10 11 48.6 9.9
 4 10 11 54.99 10.8
 4 10 11 63.79 11.7
 4 10 11 56.49 9.2
 -3 -10 -11 2.8 6.2
 -3 -10 -11 1.3 5.4
 -3 -10 -11 1.7 6
 -3 -10 -11 -3.3 5.8
 -3 -10 -11 5 6.5
 -3 -10 -11 0.5 3.2
 3 10 11 -3.2 3.4
 3 10 11 3.6 4.8
 3 10 11 -2.6 3.7
 3 10 11 -2.3 4.2
 3 10 11 -3.7 3.8
 3 10 11 -0.8 4.3
 -2 -10 -11 9.5 9.1
 -2 -10 -11 21.8 9.4
 -2 -10 -11 12.1 7
 -2 -10 -11 18.3 7.4
 -2 -10 -11 16.9 5.4
 -2 -10 -11 2.6 5.8
 2 10 11 26.2 7.5
 2 10 11 4.9 4.5
 2 10 11 14.4 5.8
 2 10 11 8.7 5.8
 2 10 11 10.6 7.1
 -1 -10 -11 -2.5 4.8
 -1 -10 -11 -2.6 3.2
 -1 -10 -11 4.3 6.7
 -1 -10 -11 -5.2 5
 -1 -10 -11 -4.8 5.3
 -1 -10 -11 -7.4 5.2
 -1 -10 -11 1 5.7
 1 10 11 0.6 3.6
 1 10 11 2.3 2.3
 1 10 11 -4.4 3.6
 1 10 11 -2.4 4.5
 1 10 11 1.9 5.8
 0 -10 -11 15.3 6.6
 0 -10 -11 -5.4 4.8
 0 -10 -11 -3.6 7.2
 0 -10 -11 -3.6 5.1
 0 -10 -11 -5 5.2
 0 -10 -11 0.2 4.3
 0 -10 -11 15.2 8.9
 0 10 11 -1 3.6
 0 10 11 -1.4 2.5
 0 10 11 -1.4 4.5
 0 10 11 -3.9 3
 0 10 11 2.2 5.6
 1 -10 -11 246.98 21.5
 1 -10 -11 210.88 21.1
 1 -10 -11 286.07 23.1
 1 -10 -11 242.78 20.6
 1 -10 -11 295.67 25.4
 1 -10 -11 210.68 23.7
 1 -10 -11 252.77 23.3
 -1 10 11 174.58 24.6
 -1 10 11 277.77 22.6
 -1 10 11 220.98 18.2
 -1 10 11 234.58 17.3
 -1 10 11 253.87 21.6
 -1 10 11 229.48 19.7
 2 -10 -11 61.49 11.5
 2 -10 -11 88.89 16
 2 -10 -11 81.09 13.4
 2 -10 -11 99.49 14.2
 2 -10 -11 64.69 13.6
 2 -10 -11 63.39 13.5
 2 -10 -11 75.99 13.2
 -2 10 11 58.89 9.7
 -2 10 11 78.99 11.7
 -2 10 11 98.49 14.8
 -2 10 11 58.39 11.4
 -2 10 11 59.89 10.4
 -2 10 11 49.9 13.2
 -2 10 11 83.19 10
 3 -10 -11 230.48 20.1
 3 -10 -11 238.88 21.8
 3 -10 -11 164.68 19.4
 3 -10 -11 196.28 22.1
 3 -10 -11 220.98 22.9
 3 -10 -11 220.38 20.5
 -3 10 11 208.98 18.7
 -3 10 11 279.47 22.6
 -3 10 11 218.68 18.7
 -3 10 11 211.98 18.6
 -3 10 11 203.38 17.2
 -3 10 11 207.68 19.9
 4 -10 -11 20.3 8.4
 4 -10 -11 11 10.5
 4 -10 -11 25.8 9
 4 -10 -11 6.3 8.1
 4 -10 -11 6.1 6.1
 -4 10 11 25.6 7.7
 -4 10 11 5.9 6.1
 -4 10 11 19.1 6.2
 -4 10 11 14.1 5.7
 -4 10 11 12.2 6.5
 5 -10 -11 8.9 7.6
 5 -10 -11 33 10.5
 5 -10 -11 5 8.5
 5 -10 -11 8.7 7.3
 -5 10 11 13.8 7.5
 -5 10 11 7.8 6.3
 -5 10 11 12 6.1
 -5 10 11 18.6 6.7
 6 -10 -11 48 12.2
 6 -10 -11 42.6 14.2
 6 -10 -11 66.69 13.9
 6 -10 -11 44.2 12.4
 -6 10 11 42.9 9.5
 -6 10 11 40.3 10
 -6 10 11 47.2 10.2
 -12 -9 -10 39.7 8
 -12 -9 -10 24.2 9.5
 -12 -9 -10 26.5 10.9
 12 9 10 29.8 10.9
 12 9 10 34.9 9.8
 12 9 10 32.5 11.9
 12 9 10 26.1 9
 -11 -9 -10 167.88 14.7
 -11 -9 -10 91.39 17.2
 -11 -9 -10 136.19 12.4
 -11 -9 -10 121.99 20.6
 11 9 10 130.79 18
 11 9 10 107.79 17.6
 11 9 10 120.69 19.8
 -10 -9 -10 24.4 9.4
 -10 -9 -10 41.7 13.2
 -10 -9 -10 40.5 8.3
 -10 -9 -10 44.2 7.6
 10 9 10 22.2 9.5
 10 9 10 30.7 11
 10 9 10 54.29 12.6
 10 9 10 62.49 12
 10 9 10 33.2 9.8
 -9 -9 -10 26.7 6.9
 -9 -9 -10 26.2 6.6
 -9 -9 -10 13.2 8.5
 -9 -9 -10 16.1 9
 -9 -9 -10 28.7 6.2
 9 9 10 25.6 7
 9 9 10 19.8 7.4
 9 9 10 30.6 8.8
 9 9 10 20.2 8.4
 9 9 10 16.6 8.6
 -8 -9 -10 9.5 4.9
 -8 -9 -10 17.2 5.1
 -8 -9 -10 16.4 6.8
 -8 -9 -10 18.3 6.2
 -8 -9 -10 14.5 8.7
 -8 -9 -10 11.8 7.3
 8 9 10 15.6 6.1
 8 9 10 30.2 9.3
 8 9 10 30.1 9.1
 8 9 10 0.5 6.1
 8 9 10 27.6 7.8
 -7 -9 -10 88.59 15.9
 -7 -9 -10 120.19 10.6
 -7 -9 -10 125.79 11.7
 -7 -9 -10 102.49 12.7
 -7 -9 -10 93.49 14.5
 -7 -9 -10 120.99 14.4
 7 9 10 128.99 14.7
 7 9 10 100.79 14.9
 7 9 10 100.29 15.4
 7 9 10 110.29 14.4
 7 9 10 106.39 16.6
 -6 -9 -10 89.79 15.9
 -6 -9 -10 130.49 12.6
 -6 -9 -10 126.99 15
 -6 -9 -10 88.89 13.9
 -6 -9 -10 127.19 11.1
 -6 -9 -10 90.59 24.8
 -6 -9 -10 114.09 10
 6 9 10 88.19 13.1
 6 9 10 121.79 16.6
 6 9 10 105.39 14.8
 6 9 10 117.69 16
 6 9 10 71.69 12.8
 6 9 10 93.79 11.8
 6 9 10 137.69 15.4
 -5 -9 -10 12.5 6
 -5 -9 -10 12.5 4.1
 -5 -9 -10 13 7.4
 -5 -9 -10 22.2 7.5
 -5 -9 -10 2.3 6.4
 -5 -9 -10 11.8 7.2
 -5 -9 -10 10.4 4
 5 9 10 11.7 5.6
 5 9 10 5.8 3.9
 5 9 10 12.5 6.7
 5 9 10 14.8 6
 5 9 10 14.6 5.1
 5 9 10 19.6 6.8
 -4 -9 -10 46.3 9.8
 -4 -9 -10 27.8 9.4
 -4 -9 -10 37.7 6.1
 -4 -9 -10 31.7 8.3
 -4 -9 -10 33.2 9.1
 -4 -9 -10 27.7 10.8
 -4 -9 -10 32.9 8.5
 4 9 10 19.7 5.4
 4 9 10 36.2 8
 4 9 10 39.3 9
 4 9 10 28.7 8.5
 4 9 10 39.6 7.3
 4 9 10 30.3 7.5
 -3 -9 -10 -4.3 5.6
 -3 -9 -10 6.4 6
 -3 -9 -10 2.3 4.7
 -3 -9 -10 4.7 3.2
 -3 -9 -10 -3.8 3.5
 -3 -9 -10 6.1 6.2
 -3 -9 -10 3.6 5.5
 3 9 10 1.6 4.3
 3 9 10 1.4 3.6
 3 9 10 -6.4 4
 3 9 10 0.1 3.7
 3 9 10 1.9 4.1
 3 9 10 -1.3 2.7
 -2 -9 -10 11.3 6.9
 -2 -9 -10 7.4 6.3
 -2 -9 -10 7 5.5
 -2 -9 -10 1.3 4.9
 -2 -9 -10 13.8 4.8
 -2 -9 -10 6.5 5.9
 -2 -9 -10 12.3 3.7
 -2 -9 -10 1.4 6.7
 2 9 10 13.6 2.8
 2 9 10 15.2 7.2
 2 9 10 12.4 5.2
 2 9 10 12.6 4.1
 2 9 10 4.4 4.8
 2 9 10 9.3 8
 2 9 10 13.3 5.9
 2 9 10 12.2 5.6
 -1 -9 -10 40.8 8.8
 -1 -9 -10 28.8 10.1
 -1 -9 -10 34.9 9.7
 -1 -9 -10 49 9.9
 -1 -9 -10 55.99 7.5
 -1 -9 -10 51.79 9.8
 -1 -9 -10 49.5 8.1
 -1 -9 -10 35.3 8.7
 1 9 10 45.7 8.8
 1 9 10 39.9 7.2
 1 9 10 20.4 5.3
 1 9 10 33.3 10.8
 1 9 10 44 5.8
 1 9 10 26.5 6.8
 1 9 10 32.4 8.3
 1 9 10 45.7 5.2
 0 -9 -10 0.3 3.5
 0 -9 -10 4 5.1
 0 -9 -10 -2.3 5.7
 0 -9 -10 -2.9 4.4
 0 -9 -10 1.7 3.6
 0 -9 -10 1.6 5.8
 0 -9 -10 2.5 5.9
 0 -9 -10 -0.6 4.8
 0 9 10 1.5 3.5
 0 9 10 0.3 3.5
 0 9 10 0.4 2.3
 0 9 10 -0.3 3.4
 0 9 10 2.2 5.2
 0 9 10 -4.4 4.2
 0 9 10 -3.2 3.7
 0 9 10 -0.3 2.9
 1 -9 -10 46.3 9.6
 1 -9 -10 47.5 11.4
 1 -9 -10 45 8.4
 1 -9 -10 50.99 9.4
 1 -9 -10 37.4 8.9
 1 -9 -10 47 11.6
 1 -9 -10 50.09 11.6
 1 -9 -10 50.59 10
 -1 9 10 52.49 10.3
 -1 9 10 43 9
 -1 9 10 30.6 10.4
 -1 9 10 47.8 6.9
 -1 9 10 45 8
 -1 9 10 44.8 7.4
 -1 9 10 52.09 7.6
 -1 9 10 55.39 9.6
 -1 9 10 55.59 9.1
 2 -9 -10 188.88 19.1
 2 -9 -10 196.28 21.9
 2 -9 -10 238.58 22.7
 2 -9 -10 246.48 20.2
 2 -9 -10 214.38 20.2
 2 -9 -10 253.97 20.6
 2 -9 -10 268.97 21.6
 2 -9 -10 250.07 22.7
 -2 9 10 245.38 20.9
 -2 9 10 215.08 18.3
 -2 9 10 236.68 17.4
 -2 9 10 242.58 20.8
 -2 9 10 190.98 23.6
 -2 9 10 244.08 19.3
 -2 9 10 265.47 20.7
 -2 9 10 211.68 18.5
 3 -9 -10 313.47 25.2
 3 -9 -10 235.38 23.9
 3 -9 -10 294.67 27.4
 3 -9 -10 335.07 25.9
 3 -9 -10 341.37 24.4
 3 -9 -10 307.47 26.7
 3 -9 -10 326.77 27.6
 3 -9 -10 290.37 24.6
 -3 9 10 301.37 22.2
 -3 9 10 339.87 25.8
 -3 9 10 364.76 25.8
 -3 9 10 332.87 24
 -3 9 10 274.37 23.8
 -3 9 10 267.67 22.9
 -3 9 10 303.97 23
 -3 9 10 249.78 27.8
 4 -9 -10 471.35 37.8
 4 -9 -10 556.04 37.9
 4 -9 -10 434.26 39
 4 -9 -10 515.55 35.7
 4 -9 -10 554.14 38.1
 -4 9 10 493.05 35.8
 -4 9 10 520.05 35.8
 -4 9 10 493.85 37.1
 -4 9 10 544.75 37.5
 -4 9 10 535.05 35.8
 -4 9 10 459.85 34.1
 -4 9 10 474.95 34.3
 5 -9 -10 89.89 13.7
 5 -9 -10 71.09 11.8
 5 -9 -10 96.59 14.9
 5 -9 -10 85.09 13.9
 -5 9 10 91.89 13.3
 -5 9 10 80.99 12.4
 -5 9 10 61.69 10.6
 -5 9 10 88.99 12
 -5 9 10 90.09 14.2
 -5 9 10 70.79 10.6
 6 -9 -10 1.1 7.9
 6 -9 -10 -2 7.1
 6 -9 -10 0 6.1
 6 -9 -10 2.1 5.9
 -6 9 10 -4.6 4.2
 -6 9 10 11.1 6.1
 -6 9 10 -2.8 4.4
 -6 9 10 -5.1 3.7
 -6 9 10 -2.1 4.4
 7 -9 -10 4.3 6.4
 7 -9 -10 -0.3 5.7
 7 -9 -10 13.1 7.1
 7 -9 -10 7.9 8.6
 -7 9 10 6.9 6.6
 -7 9 10 -0.6 5.3
 -7 9 10 6.9 5.1
 -7 9 10 11.1 5.9
 -7 9 10 1.4 6.2
 8 -9 -10 41.4 11.4
 8 -9 -10 22.1 12.5
 8 -9 -10 28 11
 -8 9 10 37.7 9.6
 -8 9 10 21.5 8.5
 -8 9 10 17.9 6.9
 -8 9 10 31.7 9.1
 -12 -8 -9 115.19 20.7
 -12 -8 -9 193.78 17.2
 -12 -8 -9 208.28 16
 12 8 9 162.98 19.6
 12 8 9 180.88 24.1
 12 8 9 189.88 24.7
 12 8 9 148.89 20.9
 -11 -8 -9 15.7 4.3
 -11 -8 -9 12.8 5.2
 -11 -8 -9 9.9 8.5
 -11 -8 -9 11.5 5.6
 11 8 9 3.3 6.1
 11 8 9 18.9 6.9
 11 8 9 7.9 7.5
 11 8 9 9.7 8
 -10 -8 -9 221.78 18.1
 -10 -8 -9 206.68 23.1
 -10 -8 -9 223.28 18.2
 -10 -8 -9 220.98 17
 10 8 9 207.08 20.6
 10 8 9 204.38 21
 10 8 9 217.68 18.7
 10 8 9 222.88 23.6
 10 8 9 226.88 22.7
 -9 -8 -9 38.7 7.1
 -9 -8 -9 43.7 7.6
 -9 -8 -9 44.8 7.3
 -9 -8 -9 36.4 7.8
 -9 -8 -9 21.7 8.4
 -9 -8 -9 47.7 12
 9 8 9 24.4 8.7
 9 8 9 38.2 9.7
 9 8 9 20 7.5
 9 8 9 17.6 8.6
 9 8 9 49.8 8.3
 -8 -8 -9 76.69 9
 -8 -8 -9 68.69 9.3
 -8 -8 -9 40.9 10.5
 -8 -8 -9 57.09 13.3
 -8 -8 -9 70.59 9.7
 -8 -8 -9 69.49 9.9
 8 8 9 61.59 9.7
 8 8 9 63.29 11.2
 8 8 9 55.09 11
 8 8 9 66.09 13.2
 8 8 9 74.89 12.2
 -7 -8 -9 3.8 4.1
 -7 -8 -9 3 7.2
 -7 -8 -9 15.2 5.6
 -7 -8 -9 2.9 5.8
 -7 -8 -9 -1.5 5.4
 -7 -8 -9 8.8 4.4
 -7 -8 -9 6.1 3.7
 7 8 9 2.3 4
 7 8 9 2.3 4.6
 7 8 9 11 7.4
 7 8 9 8.5 4.2
 7 8 9 7.7 5.4
 7 8 9 -3.6 4.9
 -6 -8 -9 102.09 13.2
 -6 -8 -9 116.29 9.8
 -6 -8 -9 98.59 12.9
 -6 -8 -9 83.99 13.9
 -6 -8 -9 82.49 14.6
 -6 -8 -9 111.59 12.6
 -6 -8 -9 108.59 10.6
 -6 -8 -9 119.69 18.4
 6 8 9 119.29 11.2
 6 8 9 130.69 10.9
 6 8 9 101.19 14.6
 6 8 9 117.39 13.4
 6 8 9 91.89 13.9
 6 8 9 115.49 12.3
 6 8 9 112.99 14.8
 6 8 9 115.69 11.4
 -5 -8 -9 86.69 11.5
 -5 -8 -9 107.79 13.3
 -5 -8 -9 64.59 12.7
 -5 -8 -9 98.09 8.7
 -5 -8 -9 88.49 12
 -5 -8 -9 82.89 16.8
 -5 -8 -9 92.29 13
 -5 -8 -9 111.09 9.7
 -5 -8 -9 90.69 11.3
 5 8 9 92.89 9
 5 8 9 92.29 12.7
 5 8 9 101.29 14.3
 5 8 9 106.19 12.6
 5 8 9 99.19 13.7
 5 8 9 96.49 9.8
 5 8 9 94.09 8.8
 5 8 9 87.79 10.6
 5 8 9 102.19 13.9
 -4 -8 -9 171.68 16.2
 -4 -8 -9 141.99 17.2
 -4 -8 -9 168.18 16.8
 -4 -8 -9 175.78 12.7
 -4 -8 -9 186.68 23
 -4 -8 -9 167.48 12.9
 -4 -8 -9 163.88 15.2
 -4 -8 -9 180.08 13.2
 -4 -8 -9 139.19 18.6
 4 8 9 162.38 12.7
 4 8 9 165.48 13.7
 4 8 9 193.08 15
 4 8 9 186.58 14
 4 8 9 150.08 17.7
 4 8 9 163.48 14.4
 4 8 9 153.98 15.7
 4 8 9 131.69 14.2
 -3 -8 -9 183.88 13.6
 -3 -8 -9 156.08 16
 -3 -8 -9 180.78 16.7
 -3 -8 -9 161.48 13
 -3 -8 -9 163.28 13.8
 -3 -8 -9 174.38 17.9
 -3 -8 -9 183.18 15.6
 -3 -8 -9 158.48 20.5
 3 8 9 184.98 15.1
 3 8 9 193.18 14.6
 3 8 9 148.69 14.1
 3 8 9 160.08 12.2
 3 8 9 146.09 15
 3 8 9 174.48 16.5
 3 8 9 151.78 14.4
 3 8 9 148.49 13
 -2 -8 -9 36.5 10.7
 -2 -8 -9 43.1 9.3
 -2 -8 -9 29.3 5.4
 -2 -8 -9 41.5 4.9
 -2 -8 -9 40.2 7.9
 -2 -8 -9 39.3 8.6
 -2 -8 -9 38.5 8.3
 -2 -8 -9 34.7 7.4
 -2 -8 -9 31.5 5
 -2 -8 -9 39.1 8.3
 -2 -8 -9 34.6 6.3
 2 8 9 47.1 7.5
 2 8 9 43 8.9
 2 8 9 29.2 6.9
 2 8 9 40.8 4.4
 2 8 9 42.1 8.1
 2 8 9 30.4 10.4
 2 8 9 33.8 5.9
 2 8 9 28.8 6.5
 2 8 9 32.2 4.9
 -1 -8 -9 42.7 5.8
 -1 -8 -9 51.09 9.3
 -1 -8 -9 42.1 9.5
 -1 -8 -9 49.1 8.7
 -1 -8 -9 41.5 8.1
 -1 -8 -9 48.9 7.7
 -1 -8 -9 52.49 9.6
 -1 -8 -9 47.7 11.6
 -1 -8 -9 37.5 6.2
 -1 -8 -9 42.6 8
 1 8 9 40 5.6
 1 8 9 34.4 5.4
 1 8 9 61.19 9.6
 1 8 9 43.1 7.5
 1 8 9 64.29 10.3
 1 8 9 42.3 11.7
 1 8 9 52.69 7.1
 1 8 9 51.09 5.4
 1 8 9 35.5 7.3
 0 -8 -9 14.9 5.8
 0 -8 -9 15.9 6.9
 0 -8 -9 15.9 7.5
 0 -8 -9 13.6 5.7
 0 -8 -9 6.7 6.1
 0 -8 -9 9.7 3.5
 0 -8 -9 9.7 4.4
 0 -8 -9 12.6 5.5
 0 -8 -9 16.6 5.7
 0 -8 -9 16.9 5.2
 0 -8 -9 18.9 6.6
 0 8 9 3.6 4.1
 0 8 9 12.4 3.9
 0 8 9 9.9 3.3
 0 8 9 13.5 5.3
 0 8 9 9 3.5
 0 8 9 13.1 5.9
 0 8 9 14.6 4.9
 0 8 9 11.7 4
 0 8 9 7 6.1
 0 8 9 19 5.2
 1 -8 -9 13.4 5.1
 1 -8 -9 13.2 7
 1 -8 -9 10.7 6.5
 1 -8 -9 22.1 6.2
 1 -8 -9 14.1 7.1
 1 -8 -9 9.7 5.2
 1 -8 -9 12.7 4.7
 1 -8 -9 18.1 6.7
 1 -8 -9 8.7 4.4
 -1 8 9 15.1 5.2
 -1 8 9 17.4 4.1
 -1 8 9 14.1 7.5
 -1 8 9 11.9 3.9
 -1 8 9 12.7 5
 -1 8 9 29.6 7.4
 -1 8 9 16.6 5.9
 -1 8 9 13.6 4.5
 -1 8 9 13.8 5.2
 2 -8 -9 24.6 6.6
 2 -8 -9 6 5
 2 -8 -9 19.5 6.1
 2 -8 -9 24.1 6.4
 2 -8 -9 20.3 6.1
 2 -8 -9 23.9 8
 2 -8 -9 9.8 5.4
 2 -8 -9 16.6 7.2
 2 -8 -9 21.6 8.9
 -2 8 9 28.3 6.9
 -2 8 9 15.7 5.1
 -2 8 9 15.3 5.6
 -2 8 9 18.9 4.7
 -2 8 9 19.5 6.1
 -2 8 9 4.5 3.7
 -2 8 9 12.9 6.6
 -2 8 9 21.4 5.8
 -2 8 9 23.1 5.6
 3 -8 -9 138.29 15.6
 3 -8 -9 141.89 14.2
 3 -8 -9 119.29 16.8
 3 -8 -9 143.89 13.9
 3 -8 -9 110.99 13.7
 3 -8 -9 158.38 14.1
 3 -8 -9 129.39 18.5
 3 -8 -9 122.69 14
 3 -8 -9 156.18 15.1
 -3 8 9 141.69 12.5
 -3 8 9 106.89 11.3
 -3 8 9 117.99 16.8
 -3 8 9 133.49 13.4
 -3 8 9 152.58 14.1
 -3 8 9 157.08 13.8
 -3 8 9 124.49 15.1
 -3 8 9 158.08 12.7
 -3 8 9 146.59 14.2
 4 -8 -9 78.59 13.4
 4 -8 -9 76.49 12.5
 4 -8 -9 85.09 12.4
 4 -8 -9 88.99 16
 4 -8 -9 114.29 14.3
 4 -8 -9 73.59 12.2
 4 -8 -9 59.79 10.2
 4 -8 -9 87.09 11.1
 -4 8 9 90.69 12.3
 -4 8 9 90.69 12.6
 -4 8 9 69.89 13.7
 -4 8 9 88.59 11.5
 -4 8 9 69.79 10
 -4 8 9 114.49 12.3
 -4 8 9 85.09 11.9
 -4 8 9 84.19 10.8
 5 -8 -9 225.48 19.9
 5 -8 -9 255.47 22.2
 5 -8 -9 212.48 24.2
 5 -8 -9 251.87 21.7
 5 -8 -9 204.78 21.4
 5 -8 -9 230.58 20
 5 -8 -9 263.67 21.9
 -5 8 9 246.78 21.2
 -5 8 9 273.97 19.4
 -5 8 9 228.58 26.1
 -5 8 9 247.98 19.8
 -5 8 9 240.78 19.9
 -5 8 9 273.97 21.8
 -5 8 9 250.27 19.5
 -5 8 9 291.77 22.3
 6 -8 -9 42.5 10.4
 6 -8 -9 14.6 6.3
 6 -8 -9 33 11.9
 6 -8 -9 26.2 8.7
 6 -8 -9 29.6 7.7
 6 -8 -9 23.8 8.1
 -6 8 9 34.3 8.6
 -6 8 9 33.4 8.5
 -6 8 9 36.3 7.7
 -6 8 9 32.9 8.3
 -6 8 9 29.2 7.1
 7 -8 -9 -7.1 6.2
 7 -8 -9 9.2 6.2
 7 -8 -9 5.8 8.3
 7 -8 -9 6.1 6.6
 -7 8 9 4.7 5.3
 -7 8 9 5 5.2
 -7 8 9 7.1 5.7
 -7 8 9 9.4 5.9
 8 -8 -9 19.8 10.3
 8 -8 -9 35.6 9.7
 8 -8 -9 26.6 9.3
 -8 8 9 24.3 7.7
 -8 8 9 35.7 9.3
 -8 8 9 43.4 10.4
 -8 8 9 28.8 8.4
 9 -8 -9 -3.3 6.5
 9 -8 -9 -6.7 5
 9 -8 -9 -7 8.1
 -9 8 9 -0.4 4.7
 -9 8 9 -3.7 3.7
 -9 8 9 3.1 5.6
 -9 8 9 0.3 5.1
 -13 -7 -8 -1.7 5.2
 -13 -7 -8 -1.4 5.7
 -13 -7 -8 -4.7 3.2
 13 7 8 3.6 6.4
 13 7 8 -4.9 4.9
 13 7 8 -4.9 6.7
 13 7 8 6.3 6.4
 13 7 8 -3.9 6
 -12 -7 -8 18.9 8.5
 -12 -7 -8 22.2 6.8
 -12 -7 -8 20.9 5.7
 12 7 8 16.1 8
 12 7 8 38.2 12.1
 12 7 8 29.5 10.7
 12 7 8 10.4 7.5
 12 7 8 17.3 7.5
 -11 -7 -8 65.99 9.2
 -11 -7 -8 63.19 10
 -11 -7 -8 27 10
 11 7 8 64.09 12.4
 11 7 8 54.69 10.9
 11 7 8 71.69 14.8
 11 7 8 51.39 11.9
 11 7 8 76.59 13
 -10 -7 -8 435.36 31
 -10 -7 -8 460.95 31.9
 -10 -7 -8 432.96 36.6
 -10 -7 -8 451.45 29.9
 10 7 8 397.56 34
 10 7 8 532.45 35.7
 10 7 8 440.66 36.8
 10 7 8 455.65 36.6
 10 7 8 432.96 31.9
 10 7 8 451.95 33.6
 10 7 8 492.45 32.5
 -9 -7 -8 24.1 5.9
 -9 -7 -8 27.3 6.2
 -9 -7 -8 24.9 6.1
 -9 -7 -8 20.9 8.4
 -9 -7 -8 35.1 6
 -9 -7 -8 36.7 6.6
 9 7 8 27.9 5.8
 9 7 8 15.9 6.9
 9 7 8 25.2 8.6
 9 7 8 20.7 8.9
 9 7 8 29.8 6.6
 9 7 8 21.2 7.2
 9 7 8 31.2 6.8
 -8 -7 -8 13.8 4.3
 -8 -7 -8 2.6 6.7
 -8 -7 -8 22.6 5.7
 -8 -7 -8 11.8 6.8
 -8 -7 -8 11.6 4.4
 -8 -7 -8 4.3 3.9
 -8 -7 -8 9.9 3.9
 8 7 8 14.9 4.3
 8 7 8 13.5 6.2
 8 7 8 2.8 3.9
 8 7 8 11.2 5.9
 8 7 8 16 7.7
 8 7 8 12.4 5.1
 8 7 8 5.4 4.4
 8 7 8 19.4 6.9
 -7 -7 -8 24.5 5.3
 -7 -7 -8 15.3 8.8
 -7 -7 -8 30.8 8.8
 -7 -7 -8 31.6 6.6
 -7 -7 -8 29.6 5.5
 -7 -7 -8 25.8 5.8
 -7 -7 -8 30.1 6.7
 7 7 8 21.6 8.1
 7 7 8 29.4 5.6
 7 7 8 24.1 4.6
 7 7 8 24 6.9
 7 7 8 31.3 6.2
 7 7 8 44.6 10
 7 7 8 27.3 7.4
 7 7 8 37.3 6.7
 -6 -7 -8 215.78 19.5
 -6 -7 -8 215.88 17
 -6 -7 -8 184.88 24
 -6 -7 -8 230.48 16
 -6 -7 -8 146.79 19.2
 -6 -7 -8 226.18 15.3
 -6 -7 -8 199.78 16.9
 -6 -7 -8 208.48 17.1
 -6 -7 -8 196.48 16.2
 6 7 8 186.28 17.1
 6 7 8 173.78 18.1
 6 7 8 214.68 15.5
 6 7 8 212.58 14.9
 6 7 8 195.98 15.8
 6 7 8 201.18 19.6
 6 7 8 208.78 14.4
 6 7 8 199.18 18.4
 6 7 8 226.38 16.9
 -5 -7 -8 70.99 6.8
 -5 -7 -8 55.09 9.7
 -5 -7 -8 60.29 9.1
 -5 -7 -8 59.39 8.4
 -5 -7 -8 59.89 6.2
 -5 -7 -8 62.69 7.3
 -5 -7 -8 72.99 9.7
 -5 -7 -8 61.99 8.6
 -5 -7 -8 46.6 12.6
 -5 -7 -8 38 9.6
 5 7 8 78.59 9
 5 7 8 58.99 9.2
 5 7 8 59.69 10.8
 5 7 8 50.89 9.3
 5 7 8 65.29 7.8
 5 7 8 82.29 12
 5 7 8 59.89 7.4
 5 7 8 66.19 6.7
 5 7 8 64.69 9
 -4 -7 -8 13.1 4.9
 -4 -7 -8 14.4 3.7
 -4 -7 -8 4.4 4.9
 -4 -7 -8 16.5 6.1
 -4 -7 -8 12.5 3.5
 -4 -7 -8 21.7 5.8
 -4 -7 -8 8.7 4.2
 -4 -7 -8 19.2 3.8
 -4 -7 -8 14.3 7.6
 4 7 8 18.4 4.1
 4 7 8 14.5 4.4
 4 7 8 16 6
 4 7 8 15.8 6.1
 4 7 8 11.3 4.3
 4 7 8 11.9 3.5
 4 7 8 14.5 4.3
 4 7 8 21.2 5.7
 4 7 8 17.2 6.2
 -3 -7 -8 128.89 13.4
 -3 -7 -8 136.79 13.1
 -3 -7 -8 138.89 10.4
 -3 -7 -8 132.19 10.4
 -3 -7 -8 124.59 17.2
 -3 -7 -8 112.79 8.2
 -3 -7 -8 128.79 12.3
 -3 -7 -8 111.59 13.8
 -3 -7 -8 123.59 12
 -3 -7 -8 88.69 12.3
 -3 -7 -8 123.99 9.7
 3 7 8 125.59 9.6
 3 7 8 134.89 11.7
 3 7 8 140.59 11.3
 3 7 8 113.09 11
 3 7 8 119.59 11.5
 3 7 8 120.79 10.4
 3 7 8 128.49 14.9
 3 7 8 100.59 13.2
 -2 -7 -8 535.25 34.4
 -2 -7 -8 531.05 31
 -2 -7 -8 549.05 32.6
 -2 -7 -8 433.16 30.1
 -2 -7 -8 547.35 33.5
 -2 -7 -8 471.95 38.3
 -2 -7 -8 491.45 33.5
 -2 -7 -8 493.55 33.7
 -2 -7 -8 505.15 31.8
 -2 -7 -8 449.06 34.6
 -2 -7 -8 424.36 29.6
 2 7 8 460.95 29.3
 2 7 8 490.15 30.3
 2 7 8 485.35 32.3
 2 7 8 498.45 33.3
 2 7 8 522.25 33
 2 7 8 407.36 37.9
 2 7 8 462.35 34.1
 2 7 8 465.75 32.4
 2 7 8 487.55 31.1
 -1 -7 -8 104.59 12.8
 -1 -7 -8 112.59 11.5
 -1 -7 -8 90.39 8.2
 -1 -7 -8 112.59 11.4
 -1 -7 -8 117.29 10.1
 -1 -7 -8 110.29 12.3
 -1 -7 -8 96.29 14.2
 -1 -7 -8 89.79 8.9
 -1 -7 -8 110.79 12.8
 -1 -7 -8 111.49 11.5
 1 7 8 112.09 7.9
 1 7 8 115.99 13.4
 1 7 8 68.59 13.7
 1 7 8 98.89 8.3
 1 7 8 95.89 8.8
 1 7 8 108.19 10.5
 1 7 8 109.39 10.9
 1 7 8 111.29 8.5
 1 7 8 101.59 10.3
 0 -7 -8 60.89 8.5
 0 -7 -8 63.19 8.8
 0 -7 -8 68.69 10.9
 0 -7 -8 63.09 9.5
 0 -7 -8 73.29 11.6
 0 -7 -8 69.19 6.8
 0 -7 -8 80.79 10
 0 -7 -8 71.09 10.1
 0 -7 -8 78.09 11.3
 0 -7 -8 66.39 8.2
 0 -7 -8 68.59 9.1
 0 7 8 75.89 6.6
 0 7 8 56.79 7
 0 7 8 62.79 8.8
 0 7 8 55.99 11.4
 0 7 8 81.29 11.1
 0 7 8 77.39 7.3
 0 7 8 63.69 6.6
 0 7 8 68.49 8.5
 0 7 8 72.89 9.5
 0 7 8 63.19 8.8
 1 -7 -8 77.39 10.7
 1 -7 -8 66.39 9.4
 1 -7 -8 88.39 12.7
 1 -7 -8 74.59 9.2
 1 -7 -8 78.99 11.7
 1 -7 -8 93.39 12.4
 1 -7 -8 73.49 10.8
 1 -7 -8 72.69 11.4
 1 -7 -8 86.09 9.9
 1 -7 -8 77.09 10.3
 -1 7 8 78.39 10.6
 -1 7 8 79.09 7.4
 -1 7 8 58.69 11.6
 -1 7 8 76.19 9.5
 -1 7 8 97.49 10.4
 -1 7 8 73.79 7.3
 -1 7 8 71.19 7.4
 -1 7 8 66.09 9.6
 -1 7 8 72.29 8.2
 -1 7 8 79.19 10.8
 2 -7 -8 66.19 9.7
 2 -7 -8 68.29 8.7
 2 -7 -8 78.29 9.3
 2 -7 -8 55.99 10.6
 2 -7 -8 71.09 9.9
 2 -7 -8 72.99 10.8
 2 -7 -8 75.39 10.4
 2 -7 -8 52.09 10.8
 2 -7 -8 69.39 10
 -2 7 8 70.69 10.2
 -2 7 8 65.19 8.9
 -2 7 8 73.09 8.3
 -2 7 8 79.09 9.4
 -2 7 8 75.59 10
 -2 7 8 57.39 11.3
 -2 7 8 82.19 8.3
 -2 7 8 55.19 7.2
 -2 7 8 79.39 10.5
 3 -7 -8 223.58 20.6
 3 -7 -8 284.07 22.7
 3 -7 -8 244.68 21.2
 3 -7 -8 281.27 21.7
 3 -7 -8 298.67 23.2
 3 -7 -8 262.87 23.9
 3 -7 -8 307.17 20.9
 3 -7 -8 243.38 21.2
 3 -7 -8 249.28 20.2
 3 -7 -8 250.77 19.7
 -3 7 8 266.87 19.7
 -3 7 8 250.47 23.9
 -3 7 8 279.17 21.6
 -3 7 8 290.57 21.6
 -3 7 8 246.78 18.7
 -3 7 8 240.38 20.5
 -3 7 8 296.17 20.8
 -3 7 8 300.57 19.9
 -3 7 8 296.97 21.2
 4 -7 -8 26.2 7.1
 4 -7 -8 20.5 5.5
 4 -7 -8 18.6 9
 4 -7 -8 41.1 9.1
 4 -7 -8 24.3 6.3
 4 -7 -8 36.3 7.3
 4 -7 -8 38.4 8.5
 4 -7 -8 26.4 7.2
 4 -7 -8 42.4 8.7
 -4 7 8 34.8 7.4
 -4 7 8 21.1 6.1
 -4 7 8 33.3 7.2
 -4 7 8 25.8 7.1
 -4 7 8 25.9 8
 -4 7 8 34.3 6.9
 -4 7 8 36.8 6.3
 -4 7 8 28.5 6.3
 5 -7 -8 234.88 21.4
 5 -7 -8 256.67 21.1
 5 -7 -8 250.57 22
 5 -7 -8 280.37 21.2
 5 -7 -8 252.87 19.9
 5 -7 -8 277.17 23.7
 5 -7 -8 271.27 25.3
 5 -7 -8 257.77 19.7
 5 -7 -8 231.48 21.3
 -5 7 8 248.98 20.9
 -5 7 8 250.57 20.1
 -5 7 8 236.78 20.8
 -5 7 8 286.37 21.8
 -5 7 8 231.18 23
 -5 7 8 223.78 18.8
 -5 7 8 262.67 20
 6 -7 -8 156.38 17.8
 6 -7 -8 138.39 12.6
 6 -7 -8 125.99 16.2
 6 -7 -8 93.89 12.2
 6 -7 -8 113.89 14
 6 -7 -8 113.49 18.4
 -6 7 8 141.49 15.6
 -6 7 8 121.59 16.2
 -6 7 8 120.19 14.4
 -6 7 8 150.68 16.9
 -6 7 8 131.09 16.3
 -6 7 8 126.19 14.5
 7 -7 -8 154.08 15.7
 7 -7 -8 137.39 17.5
 7 -7 -8 148.99 18.7
 7 -7 -8 113.59 19.7
 -7 7 8 164.68 15.4
 -7 7 8 149.09 14.9
 -7 7 8 152.58 15.6
 -7 7 8 165.08 15.9
 8 -7 -8 2.6 6.7
 8 -7 -8 10.5 9.6
 8 -7 -8 7.9 6.5
 8 -7 -8 17.7 6.6
 -8 7 8 19.5 6.8
 -8 7 8 8.4 5.5
 -8 7 8 2.3 5
 -8 7 8 6.4 5
 9 -7 -8 -2.8 5.9
 9 -7 -8 -1.1 8.1
 9 -7 -8 3.6 6.6
 -9 7 8 0.5 4.5
 -9 7 8 -0.9 4.6
 -9 7 8 6.4 6.1
 -9 7 8 -1.2 5
 10 -7 -8 0.1 6.6
 10 -7 -8 14.1 11.1
 10 -7 -8 9.7 7.7
 -10 7 8 3 5.3
 -10 7 8 20.7 7.7
 -10 7 8 5 5.4
 -10 7 8 8.6 6.2
 -13 -6 -7 -4.1 3.9
 -13 -6 -7 -0.4 4.9
 -13 -6 -7 2.2 6.6
 13 6 7 -7 4.8
 13 6 7 -3.8 5.8
 13 6 7 -1.1 5
 13 6 7 -0.9 6.8
 -12 -6 -7 36.7 8.1
 -12 -6 -7 40.8 11.9
 -12 -6 -7 64.39 8.2
 12 6 7 44.4 9.3
 12 6 7 52.09 10.8
 12 6 7 25.9 10.7
 12 6 7 35.9 9
 12 6 7 67.49 13.3
 12 6 7 52.69 13.3
 -11 -6 -7 -6.3 4.8
 -11 -6 -7 -0.9 2.9
 -11 -6 -7 -1.5 2.5
 -11 -6 -7 2.1 4
 11 6 7 -0.8 6.7
 11 6 7 1.5 5.4
 11 6 7 -0.8 4.9
 11 6 7 4.4 4.8
 11 6 7 3.3 4
 11 6 7 5.4 5
 11 6 7 3.8 6.1
 -10 -6 -7 149.29 14.9
 -10 -6 -7 124.79 18.5
 -10 -6 -7 144.49 13.9
 -10 -6 -7 145.59 12.9
 -10 -6 -7 165.08 14.4
 -10 -6 -7 144.99 12.3
 10 6 7 148.09 16.1
 10 6 7 135.99 13.5
 10 6 7 148.99 16.6
 10 6 7 154.58 18.1
 10 6 7 143.09 20.2
 10 6 7 143.19 13.5
 10 6 7 157.78 14
 10 6 7 136.59 18.2
 -9 -6 -7 37 6
 -9 -6 -7 30 5.1
 -9 -6 -7 29.1 8.7
 -9 -6 -7 28.6 6.3
 -9 -6 -7 24.5 5.7
 -9 -6 -7 20.1 9.8
 -9 -6 -7 24.5 5
 -9 -6 -7 38 6.8
 -9 -6 -7 23.7 4.2
 9 6 7 22 7.6
 9 6 7 29.7 7.4
 9 6 7 30 10.2
 9 6 7 28 7.9
 9 6 7 29.3 8.6
 9 6 7 36.3 6.8
 9 6 7 25.4 6
 9 6 7 42.4 6.9
 9 6 7 20.4 8
 -8 -6 -7 464.05 29.7
 -8 -6 -7 417.66 33.5
 -8 -6 -7 370.56 38.5
 -8 -6 -7 441.56 29.3
 -8 -6 -7 417.16 27.2
 -8 -6 -7 414.96 27.7
 -8 -6 -7 451.15 29.4
 -8 -6 -7 447.96 28.7
 -8 -6 -7 431.46 29.6
 8 6 7 432.36 34
 8 6 7 426.76 29.9
 8 6 7 455.85 29.9
 8 6 7 430.96 31.8
 8 6 7 396.26 32.7
 8 6 7 462.95 31.8
 8 6 7 441.16 29.1
 8 6 7 468.25 32.3
 8 6 7 405.26 28.6
 -7 -6 -7 40.3 8.9
 -7 -6 -7 23.7 9.5
 -7 -6 -7 40.8 6.5
 -7 -6 -7 43.6 4.4
 -7 -6 -7 64.69 8.1
 -7 -6 -7 50.99 6.9
 -7 -6 -7 43.9 6.9
 -7 -6 -7 42.5 4.7
 -7 -6 -7 44.1 6.9
 -7 -6 -7 42 7.1
 7 6 7 50.49 9
 7 6 7 43.6 6.3
 7 6 7 35.1 7.6
 7 6 7 45.4 7
 7 6 7 34.5 9.1
 7 6 7 48.4 10.2
 7 6 7 50.89 7.2
 7 6 7 44.1 7
 -6 -6 -7 120.79 10.7
 -6 -6 -7 131.79 14.2
 -6 -6 -7 118.99 10.9
 -6 -6 -7 92.79 17.8
 -6 -6 -7 115.59 11.2
 -6 -6 -7 135.19 11.6
 -6 -6 -7 122.59 11.1
 -6 -6 -7 125.69 10.3
 6 6 7 111.69 10.7
 6 6 7 114.59 10.8
 6 6 7 126.69 12.2
 6 6 7 131.49 10.2
 6 6 7 119.39 15
 6 6 7 126.29 13.6
 6 6 7 128.79 9.1
 6 6 7 122.89 14.3
 6 6 7 111.29 9.9
 -5 -6 -7 96.19 9.7
 -5 -6 -7 99.89 9.9
 -5 -6 -7 76.19 14.9
 -5 -6 -7 88.69 11.4
 -5 -6 -7 95.09 9.9
 -5 -6 -7 102.99 9
 -5 -6 -7 109.59 8.6
 -5 -6 -7 111.59 9.9
 5 6 7 82.49 12
 5 6 7 106.69 8.5
 5 6 7 107.19 9.2
 5 6 7 113.39 12.8
 5 6 7 97.19 8.1
 5 6 7 88.79 12.1
 5 6 7 99.89 9.6
 5 6 7 91.19 10.1
 5 6 7 89.49 9
 5 6 7 102.29 8.9
 -4 -6 -7 6.9 2.6
 -4 -6 -7 1.3 3.4
 -4 -6 -7 2.4 1.9
 -4 -6 -7 -2.2 2.6
 -4 -6 -7 1.2 3.2
 -4 -6 -7 1.9 4.5
 -4 -6 -7 2.7 2.5
 -4 -6 -7 0.9 2.1
 -4 -6 -7 2.8 4.2
 4 6 7 1.1 2.9
 4 6 7 1.1 3.3
 4 6 7 2.7 2.9
 4 6 7 0.5 1.9
 4 6 7 7.7 5
 4 6 7 0.8 2
 4 6 7 0.1 3.3
 4 6 7 -0.9 2.3
 4 6 7 -1.2 2.2
 -3 -6 -7 99.59 8.3
 -3 -6 -7 90.09 10.5
 -3 -6 -7 107.09 8
 -3 -6 -7 97.29 10.1
 -3 -6 -7 101.39 14.6
 -3 -6 -7 98.09 11.1
 -3 -6 -7 98.79 9.8
 -3 -6 -7 89.29 10.7
 -3 -6 -7 87.99 12.5
 -3 -6 -7 97.29 8.4
 3 6 7 101.29 8.6
 3 6 7 108.29 12.6
 3 6 7 100.59 7.9
 3 6 7 82.19 10.5
 3 6 7 91.79 10
 3 6 7 107.19 11.2
 3 6 7 106.99 9.2
 3 6 7 91.69 8.9
 3 6 7 90.29 9.2
 -2 -6 -7 240.08 16.4
 -2 -6 -7 199.68 14.7
 -2 -6 -7 211.68 14.5
 -2 -6 -7 253.67 18.4
 -2 -6 -7 239.58 17.8
 -2 -6 -7 237.38 18.1
 -2 -6 -7 230.08 22.1
 -2 -6 -7 200.58 18.6
 -2 -6 -7 236.18 17.5
 -2 -6 -7 226.98 17.9
 -2 -6 -7 252.37 15.7
 2 6 7 230.78 15.8
 2 6 7 220.98 17.5
 2 6 7 241.38 17.2
 2 6 7 228.98 18.5
 2 6 7 253.57 17.4
 2 6 7 180.08 20.9
 2 6 7 217.18 14.1
 2 6 7 238.68 15.2
 -1 -6 -7 452.15 35.2
 -1 -6 -7 496.35 29.5
 -1 -6 -7 461.45 32
 -1 -6 -7 455.85 31.5
 -1 -6 -7 495.15 31.7
 -1 -6 -7 470.65 31.3
 -1 -6 -7 510.95 30.8
 -1 -6 -7 444.36 32.3
 -1 -6 -7 388.86 28.7
 -1 -6 -7 423.46 29.3
 -1 -6 -7 481.45 31.2
 1 6 7 468.45 31.1
 1 6 7 443.26 29.3
 1 6 7 457.05 28.9
 1 6 7 474.55 28.8
 1 6 7 463.75 30.9
 1 6 7 495.25 28.5
 1 6 7 448.26 32
 1 6 7 499.25 31.4
 1 6 7 450.15 30.1
 0 -6 -7 124.39 11.5
 0 -6 -7 128.49 10.9
 0 -6 -7 102.19 9.3
 0 -6 -7 138.79 11.8
 0 -6 -7 113.39 10.6
 0 -6 -7 119.99 12.2
 0 -6 -7 123.79 11.7
 0 -6 -7 103.29 9.9
 0 -6 -7 117.09 11.7
 0 -6 -7 117.79 13.6
 0 -6 -7 119.79 12
 0 6 7 119.39 10.6
 0 6 7 98.29 13.8
 0 6 7 121.59 9.5
 0 6 7 130.89 13.6
 0 6 7 132.39 9.7
 0 6 7 127.79 9.2
 0 6 7 119.19 11
 0 6 7 128.89 11.5
 0 6 7 128.89 9.1
 0 6 7 114.39 10.2
 0 6 7 101.29 14.1
 1 -6 -7 221.88 17.5
 1 -6 -7 223.98 17.8
 1 -6 -7 213.08 18.5
 1 -6 -7 207.18 16.7
 1 -6 -7 251.97 18.3
 1 -6 -7 255.67 20
 1 -6 -7 263.47 20
 1 -6 -7 266.57 20.8
 1 -6 -7 241.58 18.5
 1 -6 -7 251.77 18.5
 -1 6 7 226.28 21.4
 -1 6 7 264.77 18.9
 -1 6 7 259.27 16.7
 -1 6 7 244.88 16.5
 -1 6 7 238.48 18.6
 -1 6 7 250.47 17.8
 -1 6 7 236.28 18.8
 -1 6 7 191.68 22.3
 -1 6 7 252.67 17.4
 -1 6 7 228.38 18.6
 -1 6 7 241.58 16.6
 -1 6 7 256.17 17.5
 2 -6 -7 67.99 9.8
 2 -6 -7 55.79 8.3
 2 -6 -7 62.49 8.8
 2 -6 -7 66.99 8.5
 2 -6 -7 72.79 9.8
 2 -6 -7 83.79 8.5
 2 -6 -7 59.79 8.1
 2 -6 -7 84.49 12.1
 2 -6 -7 63.29 9.6
 2 -6 -7 52.79 7.5
 2 -6 -7 81.19 10.6
 -2 6 7 73.19 7.2
 -2 6 7 67.29 9.2
 -2 6 7 67.09 10.5
 -2 6 7 74.89 9.7
 -2 6 7 44.2 8.5
 -2 6 7 94.39 10.6
 -2 6 7 66.19 9.2
 -2 6 7 74.09 8.8
 -2 6 7 57.99 7.8
 -2 6 7 67.99 7.8
 -2 6 7 53.09 6.7
 3 -6 -7 10 5.4
 3 -6 -7 11.3 3.6
 3 -6 -7 7.8 4.1
 3 -6 -7 9.8 4.4
 3 -6 -7 5.7 3.9
 3 -6 -7 14.4 5.6
 3 -6 -7 16.9 5.2
 3 -6 -7 11.8 4.3
 3 -6 -7 7.7 6.3
 3 -6 -7 9.1 4.7
 -3 6 7 13.3 3.9
 -3 6 7 13.6 4.6
 -3 6 7 8.9 4.5
 -3 6 7 17.4 5.6
 -3 6 7 2.2 3.2
 -3 6 7 12.8 4.7
 -3 6 7 5.9 3.3
 -3 6 7 2.1 3.3
 -3 6 7 15.3 6.1
 -3 6 7 1.8 3.6
 4 -6 -7 10.8 7.7
 4 -6 -7 -0.9 4.4
 4 -6 -7 4.7 3.8
 4 -6 -7 4.1 4.4
 4 -6 -7 8.2 4.4
 4 -6 -7 3.3 3.6
 4 -6 -7 3.8 4.3
 4 -6 -7 7.5 4.4
 4 -6 -7 3.7 4.3
 4 -6 -7 9 3.5
 -4 6 7 7.9 4.6
 -4 6 7 4.3 4.3
 -4 6 7 3.9 4.6
 -4 6 7 4.5 4.2
 -4 6 7 -3.3 4.3
 -4 6 7 9 3.7
 -4 6 7 7.4 4.8
 -4 6 7 2.8 3.1
 5 -6 -7 17.9 5.3
 5 -6 -7 3.4 2.8
 5 -6 -7 6.6 5.1
 5 -6 -7 14.7 6.1
 5 -6 -7 13.4 4.8
 5 -6 -7 10.4 5.2
 5 -6 -7 24.2 7.2
 5 -6 -7 13.6 5.4
 5 -6 -7 15.7 8.3
 -5 6 7 8.6 5.3
 -5 6 7 12.3 5.5
 -5 6 7 21.4 5.7
 -5 6 7 9.5 4.2
 -5 6 7 11.9 5.6
 -5 6 7 4 4.2
 -5 6 7 11.8 4.7
 -5 6 7 16.7 5.6
 6 -6 -7 -1.7 3.4
 6 -6 -7 1.1 5.5
 6 -6 -7 3.1 4.6
 6 -6 -7 -1.6 7.6
 6 -6 -7 1.6 3.2
 6 -6 -7 -4 3
 -6 6 7 4.5 3.9
 -6 6 7 -1.6 4
 -6 6 7 -0.1 3
 -6 6 7 2.1 3.9
 -6 6 7 5.6 4.7
 -6 6 7 0.2 3.4
 -6 6 7 -1.4 4.6
 7 -6 -7 49.99 7.3
 7 -6 -7 54.79 11.3
 7 -6 -7 25.2 11.1
 7 -6 -7 47.8 8.3
 7 -6 -7 49.1 10.6
 -7 6 7 56.09 9.2
 -7 6 7 33.1 7.7
 -7 6 7 51.59 10.9
 -7 6 7 44.9 9.4
 -7 6 7 54.39 9.4
 -7 6 7 46.9 8.2
 8 -6 -7 63.19 15.3
 8 -6 -7 80.29 13.4
 8 -6 -7 112.39 15.2
 8 -6 -7 90.59 12.5
 -8 6 7 87.69 12
 -8 6 7 92.89 13
 -8 6 7 90.69 12.8
 -8 6 7 103.09 12.5
 9 -6 -7 23.1 11
 9 -6 -7 49.3 11.7
 9 -6 -7 38.5 9.8
 -9 6 7 39.8 9
 -9 6 7 45.2 8.7
 -9 6 7 36.9 9.1
 -9 6 7 43.9 9.1
 10 -6 -7 2.5 7.2
 10 -6 -7 -1.2 10.2
 10 -6 -7 -1.8 5.4
 -10 6 7 0.7 4.9
 -10 6 7 -9.1 3.4
 -10 6 7 7.6 5.4
 -10 6 7 5.8 5.3
 11 -6 -7 33.1 10.7
 11 -6 -7 14.7 9.5
 11 -6 -7 1 8.2
 -11 6 7 28.5 7.6
 -11 6 7 17 6.6
 -11 6 7 21.5 7.5
 -11 6 7 3.3 4.7
 -14 -5 -6 55.19 11.7
 -14 -5 -6 64.19 14.7
 -14 -5 -6 70.39 8.7
 14 5 6 65.49 15.7
 14 5 6 79.39 17.7
 14 5 6 76.59 15.3
 14 5 6 49.6 12.7
 -13 -5 -6 24.1 9.6
 -13 -5 -6 51.49 7.2
 -13 -5 -6 50.49 10.5
 13 5 6 41.8 11.1
 13 5 6 47.3 11.3
 13 5 6 45 12.3
 13 5 6 28.9 11.2
 -12 -5 -6 -0.6 4.8
 -12 -5 -6 -0.6 3
 -12 -5 -6 3.3 5.6
 12 5 6 -1.6 4.9
 12 5 6 3.2 4.1
 12 5 6 -0.5 5.8
 12 5 6 -2.2 4
 12 5 6 0.1 5.8
 12 5 6 0 4.9
 12 5 6 0.4 5.1
 -11 -5 -6 78.69 11.6
 -11 -5 -6 78.09 9.3
 -11 -5 -6 56.09 7.5
 -11 -5 -6 79.29 9.7
 -11 -5 -6 65.69 13.6
 -11 -5 -6 98.59 9.8
 11 5 6 93.29 11.9
 11 5 6 79.69 14.8
 11 5 6 61.29 11.8
 11 5 6 63.89 12.3
 11 5 6 98.49 15.6
 11 5 6 72.49 11
 11 5 6 109.59 13.1
 11 5 6 72.59 11.3
 -10 -5 -6 48.2 11.2
 -10 -5 -6 61.49 7.7
 -10 -5 -6 65.79 8
 -10 -5 -6 43.7 7.5
 -10 -5 -6 48.3 6.6
 -10 -5 -6 51.09 8.2
 -10 -5 -6 49 8.7
 -10 -5 -6 57.79 15.4
 10 5 6 34.8 10.1
 10 5 6 51.89 8.3
 10 5 6 56.29 10.7
 10 5 6 57.59 9.1
 10 5 6 45.7 11.3
 10 5 6 47.6 9.9
 10 5 6 59.09 9.4
 10 5 6 50.09 8.4
 -9 -5 -6 186.28 20
 -9 -5 -6 193.78 15.5
 -9 -5 -6 191.38 16.3
 -9 -5 -6 204.78 15.2
 -9 -5 -6 193.08 16.6
 -9 -5 -6 168.68 23.7
 -9 -5 -6 206.18 15
 -9 -5 -6 202.38 14.9
 9 5 6 200.68 16.2
 9 5 6 193.48 16.1
 9 5 6 193.18 18.1
 9 5 6 224.68 16.8
 9 5 6 249.78 19.7
 9 5 6 182.18 19.3
 9 5 6 216.08 17.4
 9 5 6 221.58 21.1
 -8 -5 -6 3.5 6
 -8 -5 -6 1.7 2.5
 -8 -5 -6 0.5 4
 -8 -5 -6 -0.9 2.6
 -8 -5 -6 4 2.9
 -8 -5 -6 4.4 3
 -8 -5 -6 1.2 2.2
 -8 -5 -6 -0.1 2.8
 -8 -5 -6 1.5 3.2
 -8 -5 -6 0.4 2.4
 8 5 6 -1.3 3.5
 8 5 6 4.6 5.1
 8 5 6 3.5 2.9
 8 5 6 3.9 4.6
 8 5 6 4.2 3.8
 8 5 6 2 4.7
 8 5 6 2.3 2.8
 8 5 6 -3.8 3
 8 5 6 -0.2 3
 -7 -5 -6 42.5 5.1
 -7 -5 -6 43.5 6.6
 -7 -5 -6 36.8 10.7
 -7 -5 -6 49.7 6.6
 -7 -5 -6 46.1 6.9
 -7 -5 -6 52.79 6.9
 -7 -5 -6 41.8 6.4
 -7 -5 -6 48.2 6.6
 -7 -5 -6 42.7 5.6
 -7 -5 -6 56.99 10.2
 7 5 6 41.8 7.8
 7 5 6 40.8 8.6
 7 5 6 46.4 9.6
 7 5 6 36 6.3
 7 5 6 47.8 6.6
 7 5 6 39 7.9
 7 5 6 56.99 7.3
 7 5 6 55.19 9.3
 7 5 6 47.8 7
 -6 -5 -6 3.7 2.8
 -6 -5 -6 0.6 2.4
 -6 -5 -6 -0.1 2.2
 -6 -5 -6 -0.3 2.3
 -6 -5 -6 -1.5 2.9
 -6 -5 -6 -1.3 2.9
 -6 -5 -6 0.9 1.5
 -6 -5 -6 -0.5 2
 -6 -5 -6 1.2 1.7
 -6 -5 -6 -1.7 3.7
 6 5 6 -3.3 1.7
 6 5 6 2.5 3.3
 6 5 6 0.2 3
 6 5 6 1.4 3.6
 6 5 6 0.3 2.4
 6 5 6 -1.1 2.3
 6 5 6 1.8 2.1
 6 5 6 2.1 2.9
 6 5 6 -0.5 1.2
 6 5 6 0.3 2.2
 6 5 6 -4.3 2.9
 -5 -5 -6 191.18 17.4
 -5 -5 -6 168.88 20.7
 -5 -5 -6 204.58 13
 -5 -5 -6 216.48 15.5
 -5 -5 -6 229.18 15.9
 -5 -5 -6 202.38 14.4
 -5 -5 -6 204.28 14.5
 -5 -5 -6 180.98 15.2
 -5 -5 -6 199.48 14.8
 -5 -5 -6 205.08 15.2
 5 5 6 205.68 15
 5 5 6 202.48 16.2
 5 5 6 219.08 14.7
 5 5 6 219.08 15.3
 5 5 6 216.68 14.5
 5 5 6 213.48 17
 5 5 6 207.28 18.1
 5 5 6 208.58 15.1
 5 5 6 205.58 13.9
 5 5 6 216.78 17.8
 -4 -5 -6 2.3 2.8
 -4 -5 -6 4.2 4.7
 -4 -5 -6 0.6 3
 -4 -5 -6 8.4 2.5
 -4 -5 -6 5.2 2.3
 -4 -5 -6 9.9 3.6
 -4 -5 -6 2 2.9
 -4 -5 -6 6.9 2.7
 4 5 6 2.2 2.8
 4 5 6 5.6 2.3
 4 5 6 5.3 2.7
 4 5 6 6.6 2.5
 4 5 6 11.7 3.3
 4 5 6 8.1 3.9
 4 5 6 5.4 2.5
 4 5 6 9.5 4.3
 4 5 6 5.4 4.2
 -3 -5 -6 114.29 8.7
 -3 -5 -6 80.69 11
 -3 -5 -6 113.19 8.8
 -3 -5 -6 104.69 14.1
 -3 -5 -6 107.99 8.9
 -3 -5 -6 114.79 10.1
 -3 -5 -6 119.49 8.4
 -3 -5 -6 103.49 10.7
 -3 -5 -6 116.99 10.3
 -3 -5 -6 118.39 10.2
 -3 -5 -6 113.99 10.3
 3 5 6 104.99 8.8
 3 5 6 110.89 9.5
 3 5 6 120.09 9.5
 3 5 6 113.19 9.9
 3 5 6 114.89 8.5
 3 5 6 115.19 9.3
 3 5 6 131.49 11.8
 3 5 6 99.39 10.5
 3 5 6 104.59 11.8
 -2 -5 -6 313.57 22.7
 -2 -5 -6 300.37 26.4
 -2 -5 -6 284.67 23.6
 -2 -5 -6 343.47 20.6
 -2 -5 -6 294.57 19.6
 -2 -5 -6 303.07 21.2
 -2 -5 -6 324.47 22.8
 -2 -5 -6 333.87 22.5
 -2 -5 -6 344.57 21.5
 -2 -5 -6 325.47 22.9
 -2 -5 -6 330.07 22.3
 -2 -5 -6 361.26 20.9
 -2 -5 -6 309.37 19.9
 2 5 6 325.47 21
 2 5 6 250.47 25.6
 2 5 6 306.07 24.7
 2 5 6 385.06 23.7
 2 5 6 329.97 23.4
 2 5 6 344.17 20.5
 2 5 6 313.17 21.9
 2 5 6 348.97 22.3
 2 5 6 320.87 22.6
 -1 -5 -6 1424.16 89.69
 -1 -5 -6 1545.25 88.99
 -1 -5 -6 1309.27 87.69
 -1 -5 -6 1322.57 90.29
 -1 -5 -6 1559.24 87.89
 -1 -5 -6 1582.84 90.09
 -1 -5 -6 1517.05 89.69
 -1 -5 -6 1419.56 89.89
 -1 -5 -6 1327.77 87.29
 -1 -5 -6 1399.16 93.29
 1 5 6 1549.14 89.59
 1 5 6 1447.26 87.89
 1 5 6 1387.76 88.39
 1 5 6 1430.96 89.59
 1 5 6 1549.34 89.59
 1 5 6 1637.74 87.19
 1 5 6 1500.15 87.59
 1 5 6 1369.16 90.09
 1 5 6 1616.34 87.49
 1 5 6 1508.75 89.39
 0 -5 -6 406.56 29.4
 0 -5 -6 475.25 29.2
 0 -5 -6 423.96 29.2
 0 -5 -6 471.75 29.6
 0 -5 -6 407.46 29.1
 0 -5 -6 378.86 27.1
 0 -5 -6 466.95 28.7
 0 -5 -6 455.65 31.8
 0 -5 -6 398.56 27.7
 0 5 6 459.05 28.4
 0 5 6 369.76 31.5
 0 5 6 389.96 27.7
 0 5 6 452.95 27.4
 0 5 6 424.66 27.1
 0 5 6 431.06 28.9
 0 5 6 449.36 26.9
 0 5 6 482.95 29.2
 0 5 6 430.86 29.1
 0 5 6 440.76 27
 0 5 6 447.66 29.6
 1 -5 -6 829.32 51.09
 1 -5 -6 836.42 50.29
 1 -5 -6 789.02 50.29
 1 -5 -6 780.52 49.6
 1 -5 -6 843.12 52.29
 1 -5 -6 873.81 52.09
 1 -5 -6 749.73 49.2
 1 -5 -6 821.42 50.69
 1 -5 -6 817.52 50.59
 1 -5 -6 738.73 49.9
 1 -5 -6 780.92 51.19
 -1 5 6 819.12 50.69
 -1 5 6 820.42 49
 -1 5 6 865.71 49.6
 -1 5 6 779.12 50.89
 -1 5 6 820.72 49.6
 -1 5 6 769.82 48.6
 -1 5 6 777.62 50.69
 -1 5 6 836.52 50.79
 -1 5 6 699.33 52.69
 -1 5 6 772.12 49.6
 2 -5 -6 20.7 5.2
 2 -5 -6 26 5.6
 2 -5 -6 25.4 5.3
 2 -5 -6 30.5 4.8
 2 -5 -6 34.3 5.1
 2 -5 -6 23.3 4.8
 2 -5 -6 22.5 4.5
 2 -5 -6 33.6 6.4
 2 -5 -6 26.4 7.2
 2 -5 -6 28.4 6.2
 2 -5 -6 27.8 5.5
 2 -5 -6 30.5 6.4
 -2 5 6 29.4 4.8
 -2 5 6 34 5.9
 -2 5 6 27.1 5.2
 -2 5 6 28.6 5.3
 -2 5 6 25.7 4
 -2 5 6 19 4.4
 -2 5 6 38.1 5.6
 -2 5 6 31.9 5.8
 -2 5 6 25.5 6.3
 -2 5 6 23.3 4.3
 -2 5 6 33.4 5.7
 3 -5 -6 162.88 11.8
 3 -5 -6 157.58 13.5
 3 -5 -6 160.28 13.3
 3 -5 -6 148.69 12.3
 3 -5 -6 135.99 12.6
 3 -5 -6 151.48 13.5
 3 -5 -6 145.69 15
 3 -5 -6 142.39 13.6
 3 -5 -6 158.28 13.7
 3 -5 -6 172.08 12.5
 -3 5 6 141.99 12.8
 -3 5 6 160.28 13.2
 -3 5 6 150.28 13.6
 -3 5 6 126.99 12
 -3 5 6 156.08 12.3
 -3 5 6 151.78 13.1
 -3 5 6 144.69 14.3
 -3 5 6 136.49 12.1
 -3 5 6 154.78 12.6
 4 -5 -6 65.89 7.8
 4 -5 -6 53.49 8.8
 4 -5 -6 62.09 9.1
 4 -5 -6 55.29 8.3
 4 -5 -6 68.79 9.2
 4 -5 -6 47.4 7.9
 4 -5 -6 55.89 8.8
 4 -5 -6 56.59 10.8
 4 -5 -6 67.99 7.7
 4 -5 -6 73.79 6.5
 -4 5 6 59.99 9.2
 -4 5 6 39.1 6.5
 -4 5 6 43.5 7.4
 -4 5 6 52.69 7.5
 -4 5 6 59.79 8.6
 -4 5 6 54.39 7.7
 -4 5 6 51.19 8.5
 -4 5 6 71.89 7.9
 -4 5 6 62.79 8.5
 5 -5 -6 69.99 9.9
 5 -5 -6 79.49 13.4
 5 -5 -6 76.49 11.6
 5 -5 -6 83.39 10.7
 5 -5 -6 82.79 10.5
 5 -5 -6 84.49 6.7
 5 -5 -6 64.29 8.7
 5 -5 -6 92.19 11.8
 5 -5 -6 93.99 8.9
 -5 5 6 99.09 9.7
 -5 5 6 74.69 10.5
 -5 5 6 76.49 9.9
 -5 5 6 82.59 7.9
 -5 5 6 90.49 10.7
 -5 5 6 91.29 11.4
 -5 5 6 79.19 10.7
 -5 5 6 84.19 11.1
 -5 5 6 85.69 9.1
 6 -5 -6 93.89 12.4
 6 -5 -6 50.29 8.1
 6 -5 -6 78.19 11.8
 6 -5 -6 71.19 13.2
 6 -5 -6 81.59 11.4
 6 -5 -6 68.69 8.3
 -6 5 6 78.79 10.1
 -6 5 6 67.79 10.1
 -6 5 6 71.79 10.9
 -6 5 6 79.59 10.9
 -6 5 6 65.69 9.5
 -6 5 6 75.69 9.7
 -6 5 6 60.49 9.8
 -6 5 6 64.89 6.6
 7 -5 -6 -2.9 3.6
 7 -5 -6 0.2 2.5
 7 -5 -6 -4.2 2.2
 7 -5 -6 -4.6 3.9
 7 -5 -6 -6 5
 -7 5 6 4.2 4.6
 -7 5 6 -4.2 4.2
 -7 5 6 -3 2.9
 -7 5 6 -0.4 3.4
 -7 5 6 -0.6 3.1
 -7 5 6 0 3.7
 8 -5 -6 -4.4 5.3
 8 -5 -6 0 6.6
 8 -5 -6 1.3 3
 8 -5 -6 -1.1 4.1
 8 -5 -6 2 6.4
 8 -5 -6 3.8 3.7
 -8 5 6 -4.2 2.4
 -8 5 6 4.8 4.6
 -8 5 6 3.9 6.2
 -8 5 6 -2.1 3.8
 -8 5 6 3.7 4
 9 -5 -6 19.3 8.5
 9 -5 -6 9.2 6.6
 9 -5 -6 22.4 8.1
 9 -5 -6 15.3 10.1
 -9 5 6 9 5.8
 -9 5 6 13.8 5.5
 -9 5 6 9.2 5.4
 -9 5 6 19 6.5
 10 -5 -6 -2 5.8
 10 -5 -6 -3.6 7.6
 10 -5 -6 -5.9 4.5
 -10 5 6 2.7 4.8
 -10 5 6 0 3.5
 -10 5 6 -4.8 3.8
 -10 5 6 0.7 4.9
 11 -5 -6 3.6 9.4
 11 -5 -6 20.3 8.9
 11 -5 -6 21 8.7
 -11 5 6 19.6 6.8
 -11 5 6 19.5 7.3
 -11 5 6 13.8 5.8
 -11 5 6 16.7 6.5
 -14 -4 -5 72.59 12.8
 -14 -4 -5 32.6 11
 -14 -4 -5 58.19 7.7
 14 4 5 76.19 15.4
 14 4 5 64.49 15.5
 14 4 5 44.9 11.3
 -13 -4 -5 -6 3.5
 -13 -4 -5 7.8 7.1
 -13 -4 -5 2.4 3.3
 -13 -4 -5 1.8 5.3
 13 4 5 7.5 6.5
 13 4 5 6.4 6.9
 13 4 5 4.2 5.8
 13 4 5 -1.9 6.9
 -12 -4 -5 14.8 6.5
 -12 -4 -5 6.3 4.1
 -12 -4 -5 12.4 4.1
 -12 -4 -5 14.7 4.6
 -12 -4 -5 11.6 7.8
 -12 -4 -5 8.3 6.1
 12 4 5 13.7 7.7
 12 4 5 8 6.6
 12 4 5 0.4 5.2
 12 4 5 14.9 7.2
 12 4 5 20.2 8.9
 12 4 5 12 7.2
 -11 -4 -5 15.4 4.3
 -11 -4 -5 17.3 6.3
 -11 -4 -5 24.1 5.4
 -11 -4 -5 21.6 6.3
 -11 -4 -5 21.4 4.2
 -11 -4 -5 12.7 6.9
 -11 -4 -5 15.7 5.4
 -11 -4 -5 18.6 4.5
 11 4 5 8.9 5.7
 11 4 5 19.6 7.7
 11 4 5 22.9 8.7
 11 4 5 11.2 6.6
 11 4 5 18.1 6.3
 11 4 5 7.4 4.2
 11 4 5 19.6 6.8
 -10 -4 -5 522.15 35.2
 -10 -4 -5 481.95 33
 -10 -4 -5 464.35 31.6
 -10 -4 -5 497.55 34.2
 -10 -4 -5 426.66 37.4
 -10 -4 -5 506.55 34.2
 -10 -4 -5 484.65 31.9
 -10 -4 -5 514.65 32.9
 -10 -4 -5 521.55 33.1
 10 4 5 484.05 33.6
 10 4 5 487.65 38.6
 10 4 5 520.25 38.2
 10 4 5 503.65 34.7
 10 4 5 530.85 34.2
 10 4 5 481.55 36.5
 10 4 5 473.85 36.1
 10 4 5 515.35 34.1
 10 4 5 514.45 34.6
 -9 -4 -5 32.8 6.5
 -9 -4 -5 39.6 5.7
 -9 -4 -5 39.7 6.7
 -9 -4 -5 38.8 6.2
 -9 -4 -5 38.2 5.4
 -9 -4 -5 29.8 8
 -9 -4 -5 44.7 7.7
 9 4 5 31.3 6.5
 9 4 5 31.4 7.9
 9 4 5 41.4 7.3
 9 4 5 40 9.6
 9 4 5 37.3 6.7
 9 4 5 44.3 8
 9 4 5 41 6.9
 9 4 5 46.1 10.1
 9 4 5 33.2 8.5
 -8 -4 -5 254.77 17.5
 -8 -4 -5 232.98 16.2
 -8 -4 -5 215.08 15.8
 -8 -4 -5 220.18 17.4
 -8 -4 -5 213.88 15.2
 -8 -4 -5 208.88 20.1
 -8 -4 -5 239.78 15.9
 -8 -4 -5 224.58 16.8
 8 4 5 214.08 19.9
 8 4 5 215.38 18.7
 8 4 5 210.88 16.8
 8 4 5 210.98 16.2
 8 4 5 255.17 21.5
 8 4 5 216.18 18.9
 8 4 5 235.18 17.4
 8 4 5 231.58 17.3
 8 4 5 233.18 17.9
 -7 -4 -5 81.79 8.2
 -7 -4 -5 72.39 7.4
 -7 -4 -5 86.69 7.5
 -7 -4 -5 72.69 6.8
 -7 -4 -5 66.19 7
 -7 -4 -5 53.69 7.7
 -7 -4 -5 69.59 6.8
 -7 -4 -5 75.39 7.1
 -7 -4 -5 84.89 12
 7 4 5 77.79 8.1
 7 4 5 82.09 7.9
 7 4 5 78.59 9.9
 7 4 5 76.29 10.3
 7 4 5 86.29 8.4
 7 4 5 65.49 10.8
 7 4 5 79.79 10.3
 7 4 5 86.59 8.1
 7 4 5 97.39 13.5
 -6 -4 -5 61.39 7
 -6 -4 -5 71.19 7.1
 -6 -4 -5 51.49 12.3
 -6 -4 -5 68.09 6.6
 -6 -4 -5 76.19 6.9
 -6 -4 -5 62.79 6.5
 -6 -4 -5 58.09 5.7
 -6 -4 -5 66.59 6.7
 -6 -4 -5 44.7 8.3
 -6 -4 -5 66.99 6.5
 6 4 5 77.19 10
 6 4 5 70.29 6.9
 6 4 5 59.89 10.3
 6 4 5 68.29 7.5
 6 4 5 78.29 9.6
 6 4 5 77.79 11
 6 4 5 83.29 9.7
 6 4 5 77.09 7.3
 6 4 5 72.79 7.2
 -5 -4 -5 240.68 16.1
 -5 -4 -5 214.38 14.8
 -5 -4 -5 214.58 15.7
 -5 -4 -5 228.38 16
 -5 -4 -5 228.28 16
 -5 -4 -5 254.47 16.3
 -5 -4 -5 194.28 21.5
 -5 -4 -5 213.58 14.5
 -5 -4 -5 221.48 15.8
 -5 -4 -5 227.68 18.5
 5 4 5 225.08 15.9
 5 4 5 258.27 15.9
 5 4 5 220.78 18.7
 5 4 5 248.58 17.6
 5 4 5 229.28 14.5
 5 4 5 246.18 16.4
 5 4 5 204.08 17.8
 5 4 5 235.18 17.5
 5 4 5 194.88 16.7
 5 4 5 220.08 15.2
 5 4 5 233.48 15.3
 5 4 5 221.38 16
 -4 -4 -5 701.33 43.4
 -4 -4 -5 700.53 43.7
 -4 -4 -5 734.53 43
 -4 -4 -5 700.03 42.7
 -4 -4 -5 716.03 43.1
 -4 -4 -5 708.93 43.6
 -4 -4 -5 648.84 45.3
 -4 -4 -5 636.04 41.5
 -4 -4 -5 725.23 43.8
 -4 -4 -5 571.24 48.7
 4 4 5 723.93 43.1
 4 4 5 726.03 43.4
 4 4 5 712.63 45.6
 4 4 5 701.73 44.4
 4 4 5 714.93 43.2
 4 4 5 674.43 45.8
 4 4 5 729.03 42.7
 4 4 5 715.63 43.3
 4 4 5 695.13 44.9
 4 4 5 735.83 43.5
 -3 -4 -5 2026.9 115.79
 -3 -4 -5 1822.32 116.59
 -3 -4 -5 1981.2 114.29
 -3 -4 -5 1928.31 115.29
 -3 -4 -5 1979.9 114.59
 -3 -4 -5 1647.04 120.19
 -3 -4 -5 1923.31 114.49
 -3 -4 -5 1977.9 115.59
 3 4 5 1613.74 116.29
 3 4 5 1983.5 115.89
 3 4 5 1934.61 114.99
 3 4 5 1980.3 115.09
 3 4 5 1874.21 114.69
 3 4 5 1904.61 116.69
 3 4 5 1995.9 116.69
 3 4 5 2004 115.39
 3 4 5 2053.09 114.59
 3 4 5 1886.21 116.99
 3 4 5 2063.09 115.09
 3 4 5 1951.5 114.79
 -2 -4 -5 4.1 2.9
 -2 -4 -5 2.6 1.7
 -2 -4 -5 0.9 3.6
 -2 -4 -5 3.4 2.6
 -2 -4 -5 4 2.8
 -2 -4 -5 3.1 2
 -2 -4 -5 2.2 2.5
 -2 -4 -5 2.2 1.9
 -2 -4 -5 -1.3 2.5
 -2 -4 -5 0.2 2.1
 2 4 5 0 1.7
 2 4 5 6.6 2.7
 2 4 5 2.3 1.6
 2 4 5 3.8 2.2
 2 4 5 1.3 2.3
 2 4 5 1.4 2.4
 2 4 5 2.6 1.8
 2 4 5 5.7 2.6
 2 4 5 1.8 3
 2 4 5 1.9 2.9
 2 4 5 4.6 2.7
 -1 -4 -5 700.83 43.8
 -1 -4 -5 662.53 43.5
 -1 -4 -5 678.53 42.7
 -1 -4 -5 657.43 41.8
 -1 -4 -5 707.53 43.9
 -1 -4 -5 744.33 43.1
 -1 -4 -5 661.03 41.6
 -1 -4 -5 638.54 46.5
 -1 -4 -5 729.43 42.1
 -1 -4 -5 581.94 44
 -1 -4 -5 745.53 43.7
 -1 -4 -5 720.73 42.1
 1 4 5 746.63 42
 1 4 5 764.92 41.4
 1 4 5 619.04 43.7
 1 4 5 697.93 42.2
 1 4 5 705.93 43.3
 1 4 5 746.63 43.7
 1 4 5 755.02 44.1
 1 4 5 713.43 43.5
 1 4 5 688.53 43.3
 1 4 5 712.63 42.7
 1 4 5 710.53 43.7
 1 4 5 733.73 41.6
 1 4 5 568.54 46.2
 1 4 5 654.23 44
 0 -4 -5 14 3.5
 0 -4 -5 17.8 5.1
 0 -4 -5 18.8 4.4
 0 -4 -5 15.9 3.5
 0 -4 -5 14.8 3.8
 0 -4 -5 12 2.7
 0 -4 -5 18.9 3.8
 0 -4 -5 15.5 3.8
 0 -4 -5 20.8 4.6
 0 -4 -5 14 3.1
 0 4 5 17.9 4.2
 0 4 5 15.9 4.1
 0 4 5 17.1 2.8
 0 4 5 19.3 2.7
 0 4 5 17.5 2.9
 0 4 5 25.4 4.1
 0 4 5 17.8 5.5
 0 4 5 16.1 3.2
 0 4 5 18.7 4
 0 4 5 21.4 3.1
 0 4 5 10.4 3.3
 0 4 5 13.3 3.6
 0 4 5 11.5 3.4
 1 -4 -5 29.9 6.1
 1 -4 -5 25.4 4.4
 1 -4 -5 22.9 4.9
 1 -4 -5 20.4 4
 1 -4 -5 28.2 4.8
 1 -4 -5 27.8 5.4
 1 -4 -5 14.8 3.8
 1 -4 -5 21.7 3.9
 1 -4 -5 17.9 3.4
 1 -4 -5 27.7 4.3
 1 -4 -5 21.3 4.9
 1 -4 -5 23.5 5
 1 -4 -5 19.3 4.3
 -1 4 5 22.5 3.5
 -1 4 5 25 3.5
 -1 4 5 21.1 4.3
 -1 4 5 20.4 4.3
 -1 4 5 33.2 4.3
 -1 4 5 19.7 4.2
 -1 4 5 18.7 3.9
 -1 4 5 25.2 4.7
 -1 4 5 24.3 4.8
 -1 4 5 15.1 4.1
 -1 4 5 25.2 5.7
 -1 4 5 24.6 3.9
 -1 4 5 23.4 3.8
 2 -4 -5 27.1 6.5
 2 -4 -5 29 4.6
 2 -4 -5 24.3 4.8
 2 -4 -5 24.4 5.2
 2 -4 -5 31.3 5.8
 2 -4 -5 20.9 3.8
 2 -4 -5 19.5 4.4
 2 -4 -5 29.8 4.3
 2 -4 -5 17.9 4.9
 2 -4 -5 25.7 4.4
 2 -4 -5 22.1 4.4
 2 -4 -5 25.9 5.2
 2 -4 -5 16.1 4.1
 2 -4 -5 26.6 5.3
 -2 4 5 24.6 4.6
 -2 4 5 17.8 4.2
 -2 4 5 32.3 5.4
 -2 4 5 22.9 4.4
 -2 4 5 21.6 5.1
 -2 4 5 26.7 4.2
 -2 4 5 20.5 4
 -2 4 5 27 4.7
 -2 4 5 23.5 4.6
 -2 4 5 24.1 4.9
 3 -4 -5 235.48 19.7
 3 -4 -5 256.67 20
 3 -4 -5 256.77 19.5
 3 -4 -5 271.17 21.6
 3 -4 -5 287.37 18.1
 3 -4 -5 288.17 20
 3 -4 -5 277.27 19.8
 3 -4 -5 291.07 18.7
 3 -4 -5 261.67 18.4
 3 -4 -5 286.67 18.6
 3 -4 -5 270.37 19.8
 3 -4 -5 269.77 19.3
 -3 4 5 282.97 20
 -3 4 5 285.97 19.2
 -3 4 5 282.77 18.8
 -3 4 5 258.57 19.3
 -3 4 5 267.77 19.5
 -3 4 5 257.27 19.3
 -3 4 5 264.67 18.7
 -3 4 5 246.28 18.7
 -3 4 5 257.47 19.6
 -3 4 5 281.27 20.5
 4 -4 -5 243.18 16.9
 4 -4 -5 227.38 15.9
 4 -4 -5 205.38 15.9
 4 -4 -5 212.28 17.1
 4 -4 -5 233.68 16.5
 4 -4 -5 232.08 16.6
 4 -4 -5 211.88 17.8
 4 -4 -5 193.88 16.8
 4 -4 -5 217.48 17.4
 4 -4 -5 232.68 19.6
 4 -4 -5 230.88 14.7
 -4 4 5 227.68 16.8
 -4 4 5 215.08 16.5
 -4 4 5 238.88 18
 -4 4 5 205.88 17.1
 -4 4 5 207.68 16.5
 -4 4 5 243.98 17.9
 -4 4 5 220.88 16.8
 -4 4 5 233.28 16.2
 -4 4 5 222.68 15.5
 -4 4 5 234.08 17.1
 5 -4 -5 181.48 15.8
 5 -4 -5 236.58 17
 5 -4 -5 218.68 18.5
 5 -4 -5 217.48 16.5
 5 -4 -5 217.38 15.6
 5 -4 -5 255.17 20.7
 5 -4 -5 200.58 17.3
 5 -4 -5 218.88 17.2
 5 -4 -5 203.88 13.6
 -5 4 5 231.18 16.1
 -5 4 5 224.48 17.4
 -5 4 5 230.48 18.1
 -5 4 5 213.48 14.7
 -5 4 5 210.18 16.8
 -5 4 5 232.48 16.9
 -5 4 5 216.38 16.7
 -5 4 5 242.28 18.1
 -5 4 5 189.98 16.4
 -5 4 5 225.58 16.9
 6 -4 -5 99.99 15.1
 6 -4 -5 68.49 8.9
 6 -4 -5 80.19 11.1
 6 -4 -5 74.79 10
 6 -4 -5 92.59 10.9
 6 -4 -5 90.79 12.3
 6 -4 -5 99.29 12.3
 6 -4 -5 89.09 8.3
 -6 4 5 92.89 11.7
 -6 4 5 95.09 9.4
 -6 4 5 63.89 9.6
 -6 4 5 99.89 11.2
 -6 4 5 82.49 10.1
 -6 4 5 93.29 11.3
 -6 4 5 100.19 10.9
 -6 4 5 92.19 6.8
 -6 4 5 104.59 10
 -6 4 5 90.09 11
 7 -4 -5 172.18 15.1
 7 -4 -5 144.19 16.7
 7 -4 -5 143.19 15.3
 7 -4 -5 132.49 11.3
 7 -4 -5 118.49 12.5
 7 -4 -5 141.49 12.6
 7 -4 -5 154.08 14.6
 7 -4 -5 111.79 17
 7 -4 -5 152.98 13.8
 -7 4 5 150.38 14
 -7 4 5 154.68 13.4
 -7 4 5 162.48 15.1
 -7 4 5 156.98 15.4
 -7 4 5 131.59 13.7
 -7 4 5 155.58 13.6
 -7 4 5 152.28 13.3
 8 -4 -5 -0.9 4.2
 8 -4 -5 -2.4 4.8
 8 -4 -5 0.5 3.7
 8 -4 -5 1.3 6
 8 -4 -5 0.4 5.1
 8 -4 -5 4.2 2.6
 8 -4 -5 1.2 3.2
 -8 4 5 7.3 4.2
 -8 4 5 0.9 4.1
 -8 4 5 5 5.6
 -8 4 5 6.1 4.3
 -8 4 5 1.5 3.3
 -8 4 5 8.8 4.8
 9 -4 -5 161.18 23.6
 9 -4 -5 239.28 20.2
 9 -4 -5 182.18 19.2
 9 -4 -5 256.47 20.4
 9 -4 -5 192.18 19.2
 -9 4 5 203.28 18.8
 -9 4 5 226.08 17.6
 -9 4 5 225.78 18.1
 -9 4 5 200.08 17.5
 10 -4 -5 35.3 10
 10 -4 -5 16.7 9.6
 10 -4 -5 29.3 8.5
 10 -4 -5 40.7 9.6
 -10 4 5 32.9 7.8
 -10 4 5 22.3 6.2
 -10 4 5 34.9 8.6
 -10 4 5 39.4 8
 11 -4 -5 11.1 8.2
 11 -4 -5 52.99 11.6
 11 -4 -5 20.4 10.9
 -11 4 5 26.4 7.2
 -11 4 5 28.4 6.7
 -11 4 5 21.9 7.7
 -11 4 5 36.3 7.8
 12 -4 -5 -4.4 5.8
 12 -4 -5 -3 8.9
 12 -4 -5 -1.6 7
 -12 4 5 14.7 6.2
 -12 4 5 -2.8 3.5
 -12 4 5 -0.1 5.2
 -12 4 5 3.1 3.9
 -14 -3 -4 12.4 5.9
 -14 -3 -4 24.8 9.1
 -14 -3 -4 14.4 4.4
 14 3 4 11.8 7.9
 14 3 4 14.2 9.5
 14 3 4 15.3 7.8
 -13 -3 -4 12.5 3.9
 -13 -3 -4 24.9 8.1
 -13 -3 -4 7.6 5
 13 3 4 7.3 6.8
 13 3 4 13.4 9.4
 13 3 4 15.9 8.1
 -12 -3 -4 233.88 20.9
 -12 -3 -4 244.18 17
 -12 -3 -4 215.88 20.2
 -12 -3 -4 223.38 19
 12 3 4 240.58 23.1
 12 3 4 243.18 22.6
 12 3 4 225.28 21.1
 12 3 4 212.28 20.6
 12 3 4 255.87 21.7
 12 3 4 234.78 23.5
 12 3 4 243.38 29.5
 -11 -3 -4 26.2 5.4
 -11 -3 -4 23 4.5
 -11 -3 -4 19.9 4.1
 -11 -3 -4 12 5.1
 -11 -3 -4 13.5 4.9
 -11 -3 -4 18.4 6.8
 11 3 4 28.3 8.4
 11 3 4 17 6.2
 11 3 4 31.4 8.7
 11 3 4 26.8 9.5
 11 3 4 22.9 8.7
 11 3 4 15 7.1
 11 3 4 12.9 6.3
 -10 -3 -4 26 6.2
 -10 -3 -4 20.5 4.4
 -10 -3 -4 22.1 4.9
 -10 -3 -4 20.3 5.5
 -10 -3 -4 20.1 3.9
 -10 -3 -4 17.3 5.2
 -10 -3 -4 19 6
 -10 -3 -4 19.7 3.9
 10 3 4 14.8 5.9
 10 3 4 19 6.8
 10 3 4 23.3 8.7
 10 3 4 16.5 6.5
 10 3 4 29.5 7.6
 10 3 4 13.6 5.7
 10 3 4 8.9 3.9
 10 3 4 34.1 8.2
 -9 -3 -4 29.3 5.8
 -9 -3 -4 49.1 6.2
 -9 -3 -4 34.2 6.6
 -9 -3 -4 41.4 5.2
 -9 -3 -4 49.9 6.5
 -9 -3 -4 36.4 7.4
 -9 -3 -4 32.6 6.5
 -9 -3 -4 38.4 5.2
 9 3 4 37.2 8.3
 9 3 4 50.59 8.2
 9 3 4 37 6.8
 9 3 4 32.8 9.7
 9 3 4 37.1 6.1
 9 3 4 46.2 8.2
 9 3 4 40.9 9.6
 9 3 4 48.3 8.3
 9 3 4 37.4 8.5
 -8 -3 -4 42.4 5
 -8 -3 -4 44.6 7.7
 -8 -3 -4 44.6 5.4
 -8 -3 -4 28.7 5.8
 -8 -3 -4 34.1 6.1
 -8 -3 -4 34.8 5.6
 8 3 4 48.7 7.7
 8 3 4 28.2 6.7
 8 3 4 34.8 7.5
 8 3 4 47.5 7.4
 8 3 4 28.2 7.7
 8 3 4 39.5 6.8
 8 3 4 48.2 7.2
 8 3 4 42.1 9.8
 8 3 4 35.3 6
 -7 -3 -4 61.29 6
 -7 -3 -4 60.79 7.2
 -7 -3 -4 65.29 8.1
 -7 -3 -4 79.19 9.5
 -7 -3 -4 52.49 5.8
 -7 -3 -4 50.99 7.3
 -7 -3 -4 67.69 6
 7 3 4 72.19 9.9
 7 3 4 81.99 9.2
 7 3 4 69.59 7.2
 7 3 4 74.89 8.7
 7 3 4 63.69 9.5
 7 3 4 71.59 8
 7 3 4 52.99 10.3
 7 3 4 83.09 11.4
 7 3 4 64.39 8.1
 -6 -3 -4 24.9 4
 -6 -3 -4 27.8 4.1
 -6 -3 -4 23.5 4.6
 -6 -3 -4 24.2 3.9
 -6 -3 -4 22.2 5.5
 -6 -3 -4 23.8 3.8
 -6 -3 -4 28.6 4.6
 -6 -3 -4 25.3 4.8
 -6 -3 -4 27.2 3.8
 6 3 4 34.5 5.5
 6 3 4 32.6 6.3
 6 3 4 24.4 5.8
 6 3 4 24.5 7
 6 3 4 25.9 4.7
 6 3 4 25.9 5.2
 6 3 4 25.8 4.7
 6 3 4 28.4 6.2
 6 3 4 26.3 4.6
 -5 -3 -4 111.39 8.6
 -5 -3 -4 104.29 8.4
 -5 -3 -4 105.09 10.8
 -5 -3 -4 107.99 8.5
 -5 -3 -4 118.79 9.2
 -5 -3 -4 115.89 8.7
 -5 -3 -4 109.19 8.9
 -5 -3 -4 103.19 8
 -5 -3 -4 110.49 8.6
 5 3 4 122.89 11.9
 5 3 4 100.59 10.4
 5 3 4 105.79 10.1
 5 3 4 111.29 9.1
 5 3 4 107.29 7.1
 5 3 4 128.49 9.1
 5 3 4 105.79 9.7
 5 3 4 99.79 10
 5 3 4 101.09 6.9
 5 3 4 125.99 9
 -4 -3 -4 38.3 4.8
 -4 -3 -4 34.1 4.5
 -4 -3 -4 31.3 3.8
 -4 -3 -4 22.9 5.1
 -4 -3 -4 38 4.8
 -4 -3 -4 41 5.1
 -4 -3 -4 32.9 4.6
 -4 -3 -4 41.6 5
 -4 -3 -4 31.8 3.5
 4 3 4 39.9 5.7
 4 3 4 33.3 5.5
 4 3 4 42.3 6
 4 3 4 39.6 4.7
 4 3 4 31.9 3.4
 4 3 4 34.3 4.2
 4 3 4 35.4 4.8
 4 3 4 33.8 3.4
 4 3 4 36.5 6.8
 4 3 4 39.2 6.5
 4 3 4 36.1 4.6
 -3 -3 -4 56.79 6.2
 -3 -3 -4 55.19 5.5
 -3 -3 -4 49.2 5.6
 -3 -3 -4 50.99 5.2
 -3 -3 -4 34.9 8
 -3 -3 -4 46.3 3.7
 -3 -3 -4 56.29 4.8
 -3 -3 -4 48.6 4.8
 -3 -3 -4 48.9 6.8
 -3 -3 -4 48.3 4.5
 3 3 4 67.19 7.5
 3 3 4 56.29 4.9
 3 3 4 61.89 7
 3 3 4 54.39 5.2
 3 3 4 49.7 4.9
 3 3 4 55.19 5
 3 3 4 51.39 5.1
 3 3 4 52.19 4.8
 3 3 4 49 7.4
 3 3 4 69.19 6.4
 3 3 4 55.19 7.1
 3 3 4 38.6 6.3
 3 3 4 57.89 5
 -2 -3 -4 583.54 36.8
 -2 -3 -4 600.04 36.6
 -2 -3 -4 586.04 36.9
 -2 -3 -4 620.74 35.7
 -2 -3 -4 572.84 37.5
 -2 -3 -4 603.54 35.9
 -2 -3 -4 505.65 40
 -2 -3 -4 602.44 35.9
 2 3 4 567.54 37.4
 2 3 4 544.35 37.5
 2 3 4 486.45 37.1
 2 3 4 609.34 36.4
 2 3 4 630.24 37.6
 2 3 4 609.74 36
 2 3 4 567.74 36.4
 2 3 4 610.54 36.7
 2 3 4 646.24 35.9
 2 3 4 615.14 36.8
 2 3 4 617.14 36.6
 -1 -3 -4 5.1 2
 -1 -3 -4 2 1.5
 -1 -3 -4 2.8 1.3
 -1 -3 -4 -0.2 2.1
 -1 -3 -4 4.5 1.7
 -1 -3 -4 -1 1.8
 -1 -3 -4 1.5 2.5
 -1 -3 -4 -2.1 1.9
 -1 -3 -4 2.7 2.2
 -1 -3 -4 3 1.1
 -1 -3 -4 1.2 2.1
 1 3 4 2.3 2
 1 3 4 3.2 1.8
 1 3 4 4.6 2
 1 3 4 -0.8 2.2
 1 3 4 -0.6 2.3
 1 3 4 7 3
 1 3 4 3.8 1.4
 1 3 4 0.7 1.5
 1 3 4 1.8 0.9
 1 3 4 2.6 1.1
 1 3 4 2.9 2.1
 1 3 4 3.3 2.4
 1 3 4 3.8 3.4
 0 -3 -4 675.03 43.7
 0 -3 -4 620.34 41
 0 -3 -4 624.84 40.7
 0 -3 -4 703.33 40.8
 0 -3 -4 741.33 41.9
 0 -3 -4 679.63 42.1
 0 -3 -4 744.93 42.1
 0 -3 -4 574.54 41.8
 0 -3 -4 668.73 42.2
 0 -3 -4 716.13 42.1
 0 -3 -4 684.03 41.5
 0 3 4 690.43 40.8
 0 3 4 675.43 42.3
 0 3 4 673.73 41.3
 0 3 4 719.13 42.2
 0 3 4 706.13 40.8
 0 3 4 665.53 42
 0 3 4 686.93 40.6
 0 3 4 711.03 42.1
 0 3 4 555.74 43.4
 0 3 4 688.03 40.9
 0 3 4 685.83 41.9
 0 3 4 698.63 42
 1 -3 -4 3.4 2.5
 1 -3 -4 0.8 1.6
 1 -3 -4 3 1.8
 1 -3 -4 3.8 2.3
 1 -3 -4 3.4 2.5
 1 -3 -4 2.5 2
 1 -3 -4 0.8 2
 1 -3 -4 3.9 2.3
 1 -3 -4 3.2 2.4
 1 -3 -4 3.7 2
 1 -3 -4 6.7 2.5
 1 -3 -4 2.7 2.7
 -1 3 4 4.8 2.7
 -1 3 4 3.9 2.3
 -1 3 4 2.9 2
 -1 3 4 4.9 2.7
 -1 3 4 3 2.1
 -1 3 4 3.4 2.3
 -1 3 4 3.4 2.7
 -1 3 4 6.6 2
 -1 3 4 4.7 1.8
 -1 3 4 5.4 2.2
 -1 3 4 -0.4 1.8
 -1 3 4 5.5 2.2
 2 -3 -4 3.7 2.4
 2 -3 -4 1.3 2.3
 2 -3 -4 1.9 3.6
 2 -3 -4 2.2 2.5
 2 -3 -4 1.3 2.6
 2 -3 -4 1.6 2.2
 2 -3 -4 3.9 2.2
 2 -3 -4 3 2.6
 2 -3 -4 5.1 2.5
 2 -3 -4 3.4 2.4
 2 -3 -4 1.9 1.9
 2 -3 -4 2.3 1.9
 2 -3 -4 6.2 2.5
 2 -3 -4 5.8 2.1
 -2 3 4 -0.1 2
 -2 3 4 5.2 2.6
 -2 3 4 2.8 2
 -2 3 4 1.5 2.1
 -2 3 4 4.5 2.3
 -2 3 4 1.5 2.1
 -2 3 4 1.1 2
 -2 3 4 3.9 2.5
 -2 3 4 8 2.9
 -2 3 4 2.6 1.9
 -2 3 4 1.9 1.8
 3 -3 -4 28.9 5
 3 -3 -4 27.4 5
 3 -3 -4 20.6 4.3
 3 -3 -4 28.3 3.4
 3 -3 -4 28 4.8
 3 -3 -4 20.5 4.3
 3 -3 -4 24.3 3.9
 3 -3 -4 17.2 3.8
 3 -3 -4 23.2 3.8
 3 -3 -4 27.4 4.8
 3 -3 -4 26.6 4.6
 3 -3 -4 21.8 4.6
 3 -3 -4 23.9 6.3
 -3 3 4 20.6 4
 -3 3 4 34.1 4.3
 -3 3 4 26.7 4.6
 -3 3 4 15.9 4.2
 -3 3 4 18.7 3.9
 -3 3 4 24.5 4.6
 -3 3 4 26.4 4.6
 -3 3 4 22.1 4.3
 -3 3 4 24.8 4.8
 -3 3 4 24.8 4.6
 -3 3 4 22.7 3.6
 4 -3 -4 143.39 12
 4 -3 -4 133.09 11
 4 -3 -4 132.09 9
 4 -3 -4 147.99 14
 4 -3 -4 130.29 11.1
 4 -3 -4 138.09 10.8
 4 -3 -4 131.69 10.2
 4 -3 -4 103.59 11.7
 4 -3 -4 123.69 10.4
 4 -3 -4 153.58 14.7
 -4 3 4 157.08 12.1
 -4 3 4 116.49 10.9
 -4 3 4 138.29 11.3
 -4 3 4 132.99 11
 -4 3 4 120.49 11.2
 -4 3 4 137.99 11.1
 -4 3 4 137.99 11.1
 -4 3 4 133.89 12
 -4 3 4 131.69 9.8
 -4 3 4 160.58 10.7
 -4 3 4 137.39 10.2
 5 -3 -4 7.7 3.4
 5 -3 -4 3.3 4.3
 5 -3 -4 3.6 2.8
 5 -3 -4 1.9 2.2
 5 -3 -4 3.7 3.7
 5 -3 -4 3.8 2.7
 5 -3 -4 2.2 1
 5 -3 -4 2.1 2
 5 -3 -4 4 3.7
 -5 3 4 2.7 2.3
 -5 3 4 3.1 2.8
 -5 3 4 1.9 3
 -5 3 4 1.9 2.3
 -5 3 4 3.5 3.2
 -5 3 4 2.3 2.2
 -5 3 4 1.6 2.5
 -5 3 4 0.4 2.2
 -5 3 4 3.7 3.4
 -5 3 4 1.4 1.7
 -5 3 4 1.4 2.4
 6 -3 -4 -5.7 1.8
 6 -3 -4 -1.2 2.1
 6 -3 -4 -0.5 1.9
 6 -3 -4 -0.1 3.4
 6 -3 -4 1.5 3.2
 6 -3 -4 -3.5 2.3
 6 -3 -4 3.4 4.9
 6 -3 -4 1 2
 -6 3 4 -0.6 2.1
 -6 3 4 1.8 3.1
 -6 3 4 -1.3 3
 -6 3 4 -1.9 2.3
 -6 3 4 -1.8 2.6
 -6 3 4 -3.3 2.4
 -6 3 4 0 2.4
 -6 3 4 -1.2 3.1
 -6 3 4 3.8 3.4
 -6 3 4 -1.3 2
 7 -3 -4 10.7 3.6
 7 -3 -4 13.2 5.1
 7 -3 -4 6.4 6
 7 -3 -4 14.6 5.6
 7 -3 -4 3.6 2.3
 7 -3 -4 5 4.4
 7 -3 -4 3 3.5
 7 -3 -4 10.7 4.4
 7 -3 -4 10.8 3.8
 -7 3 4 9.4 4.8
 -7 3 4 8.4 4.8
 -7 3 4 10.2 3.3
 -7 3 4 8.9 3.6
 -7 3 4 9.3 3.7
 -7 3 4 10.3 4.6
 -7 3 4 14.8 4.9
 -7 3 4 7.7 3.7
 -7 3 4 8.4 4.9
 -7 3 4 8.9 4
 8 -3 -4 65.29 6.5
 8 -3 -4 65.59 11.4
 8 -3 -4 65.79 13.3
 8 -3 -4 88.89 11.5
 8 -3 -4 66.09 8.4
 8 -3 -4 58.59 9.8
 8 -3 -4 88.79 12.3
 8 -3 -4 46.9 12.6
 8 -3 -4 59.89 7.9
 -8 3 4 67.59 9.2
 -8 3 4 69.39 9.1
 -8 3 4 67.99 9.4
 -8 3 4 41.5 7.8
 -8 3 4 71.99 7.5
 -8 3 4 78.59 10.9
 -8 3 4 57.09 9.5
 -8 3 4 54.09 8.2
 -8 3 4 77.49 11.9
 9 -3 -4 -5.9 2.5
 9 -3 -4 -5.4 2.3
 9 -3 -4 -2.3 5.3
 9 -3 -4 -4.7 3.3
 9 -3 -4 -0.4 2
 9 -3 -4 1.9 6.3
 9 -3 -4 1.6 4.8
 -9 3 4 -1 4.7
 -9 3 4 -5.7 2.9
 -9 3 4 -1.6 2.8
 -9 3 4 1.1 2.9
 -9 3 4 0.7 4.2
 -9 3 4 -3.6 3.7
 10 -3 -4 129.29 20.8
 10 -3 -4 168.48 17.9
 10 -3 -4 172.48 17.1
 10 -3 -4 184.98 17.5
 10 -3 -4 149.79 19.8
 -10 3 4 181.98 17.2
 -10 3 4 164.68 14.6
 -10 3 4 191.48 15.3
 -10 3 4 185.28 15.8
 11 -3 -4 0.7 7.3
 11 -3 -4 14.1 6.8
 11 -3 -4 14.5 7.4
 11 -3 -4 26.1 8.3
 11 -3 -4 16.5 9.3
 -11 3 4 1 5.1
 -11 3 4 7.2 6
 -11 3 4 8.1 4.3
 -11 3 4 3.3 3.6
 12 -3 -4 15.8 10.2
 12 -3 -4 10.1 7.4
 12 -3 -4 13.1 9.3
 -12 3 4 11.6 7
 -12 3 4 20.4 5.9
 -12 3 4 6 5.9
 -12 3 4 12.7 5.2
 13 -3 -4 2.9 4.7
 13 -3 -4 -2.8 8.1
 13 -3 -4 -2.5 10.1
 -13 3 4 1.5 4.2
 -13 3 4 4.7 4.5
 -13 3 4 0.8 5.4
 -13 3 4 2 2.8
 -14 -2 -3 23.3 5
 -14 -2 -3 12 6.1
 -14 -2 -3 33.2 9.6
 14 2 3 10.6 9
 14 2 3 20.4 9.3
 14 2 3 8 6.6
 14 2 3 21.4 9.3
 -13 -2 -3 0.2 4.2
 -13 -2 -3 2 3.1
 -13 -2 -3 -1.3 4.8
 13 2 3 3 6.4
 13 2 3 4.8 6.6
 13 2 3 -12.1 4.9
 13 2 3 6.6 6.5
 -12 -2 -3 51.89 10.1
 -12 -2 -3 47.1 8.8
 -12 -2 -3 42.8 6.2
 -12 -2 -3 46.5 9
 12 2 3 52.99 10.2
 12 2 3 54.29 11.5
 12 2 3 56.19 11.8
 12 2 3 40.9 11.2
 12 2 3 41.8 12.1
 -11 -2 -3 37 7.3
 -11 -2 -3 37.1 5.4
 -11 -2 -3 37.1 8.3
 -11 -2 -3 33.3 7.6
 -11 -2 -3 47.9 7
 -11 -2 -3 37 6
 11 2 3 46 11.3
 11 2 3 44.1 8.9
 11 2 3 45.4 10.1
 11 2 3 41.9 9.6
 11 2 3 33.1 8.5
 11 2 3 58.59 13.2
 -10 -2 -3 9.3 4.2
 -10 -2 -3 8.5 3.2
 -10 -2 -3 5.8 2.4
 -10 -2 -3 0.2 3.5
 -10 -2 -3 13.7 5.2
 -10 -2 -3 8.8 3.7
 -10 -2 -3 4.5 2.5
 -10 -2 -3 14.4 4.9
 10 2 3 13.5 6.1
 10 2 3 11.2 5.7
 10 2 3 -0.8 4.1
 10 2 3 8.4 3.2
 10 2 3 7.6 4.9
 10 2 3 7.7 5.5
 10 2 3 13 7.3
 10 2 3 13.9 6.3
 -9 -2 -3 1013 61.49
 -9 -2 -3 934.31 60.69
 -9 -2 -3 949.01 58.69
 -9 -2 -3 944.41 61.99
 -9 -2 -3 1000.9 59.19
 -9 -2 -3 993.1 59.69
 -9 -2 -3 1040.3 59.29
 -9 -2 -3 947.81 61.89
 9 2 3 965.4 62.69
 9 2 3 847.62 61.99
 9 2 3 1044 62.09
 9 2 3 943.01 59.39
 9 2 3 975.6 63.19
 9 2 3 908.01 64.59
 9 2 3 970.2 63.79
 9 2 3 967.6 61.99
 9 2 3 964.6 63.49
 -8 -2 -3 186.68 13.3
 -8 -2 -3 183.18 13.2
 -8 -2 -3 201.98 13.7
 -8 -2 -3 199.28 16.3
 -8 -2 -3 208.68 14
 -8 -2 -3 205.28 15.5
 -8 -2 -3 184.78 15.7
 -8 -2 -3 190.58 15
 -8 -2 -3 214.88 14.4
 8 2 3 192.78 16.4
 8 2 3 168.58 17.9
 8 2 3 179.28 16.6
 8 2 3 189.78 17.4
 8 2 3 193.38 14.5
 8 2 3 181.38 16.8
 8 2 3 211.28 16.3
 8 2 3 178.48 16.2
 8 2 3 210.58 16.1
 -7 -2 -3 16.6 2.9
 -7 -2 -3 30.4 6.1
 -7 -2 -3 22.5 3.4
 -7 -2 -3 23 3.8
 -7 -2 -3 18.3 4
 -7 -2 -3 20.6 4.3
 -7 -2 -3 23 4.9
 -7 -2 -3 16 3
 7 2 3 15.6 4.1
 7 2 3 13.6 4.7
 7 2 3 19.2 4.8
 7 2 3 15.5 4.9
 7 2 3 16.2 4.7
 7 2 3 9.6 3.7
 7 2 3 14.8 5.2
 7 2 3 8.9 4.2
 7 2 3 18.1 5.9
 7 2 3 26.3 4.7
 -6 -2 -3 5.4 1.9
 -6 -2 -3 6.7 1.8
 -6 -2 -3 1.2 2.5
 -6 -2 -3 7 2.9
 -6 -2 -3 7.7 2.3
 -6 -2 -3 9.9 2.9
 -6 -2 -3 7.4 2
 -6 -2 -3 2.5 2
 6 2 3 3 2.9
 6 2 3 10.8 4.7
 6 2 3 5.5 2.6
 6 2 3 11.4 2.9
 6 2 3 6.3 3.5
 6 2 3 9.9 3.2
 6 2 3 6.4 3.4
 6 2 3 5 2.9
 6 2 3 6.3 3.6
 -5 -2 -3 49 4.6
 -5 -2 -3 52.49 4.7
 -5 -2 -3 49 4.8
 -5 -2 -3 49.1 5
 -5 -2 -3 49.4 6.1
 -5 -2 -3 51.29 4.8
 -5 -2 -3 61.99 6.8
 -5 -2 -3 51.99 6.5
 5 2 3 63.79 8
 5 2 3 45.9 5.8
 5 2 3 56.19 7.6
 5 2 3 53.29 6.4
 5 2 3 53.19 5.3
 5 2 3 47.1 7.7
 5 2 3 74.99 7.6
 5 2 3 72.19 7.4
 5 2 3 65.39 9.3
 5 2 3 52.89 6.4
 -4 -2 -3 600.64 36.7
 -4 -2 -3 582.84 36.3
 -4 -2 -3 555.14 36.2
 -4 -2 -3 580.14 36.9
 -4 -2 -3 593.14 36.4
 -4 -2 -3 585.44 36.3
 -4 -2 -3 634.94 37.2
 -4 -2 -3 611.44 36.2
 -4 -2 -3 525.55 38.4
 4 2 3 608.54 35.4
 4 2 3 548.25 36.7
 4 2 3 560.14 39
 4 2 3 588.34 35.8
 4 2 3 615.14 38.1
 4 2 3 638.14 37.6
 4 2 3 654.03 38.2
 4 2 3 606.94 37
 4 2 3 592.84 38.5
 4 2 3 627.24 36.7
 4 2 3 591.74 35.6
 4 2 3 620.74 37.4
 -3 -2 -3 4.5 2
 -3 -2 -3 3 2.3
 -3 -2 -3 5 2
 -3 -2 -3 4.3 1.6
 -3 -2 -3 7 1.5
 -3 -2 -3 5.6 2.1
 -3 -2 -3 6 2
 -3 -2 -3 2.6 1.7
 -3 -2 -3 3.1 1.8
 3 2 3 3.4 1.7
 3 2 3 1.6 2.2
 3 2 3 5.4 2.3
 3 2 3 4.8 1.6
 3 2 3 3 2.3
 3 2 3 4.5 1.8
 3 2 3 5.1 1.4
 3 2 3 1.5 3.2
 3 2 3 3.1 1.7
 3 2 3 4.9 2
 3 2 3 3.7 2.3
 3 2 3 3.1 1.7
 -2 -2 -3 246.28 15
 -2 -2 -3 245.88 15.2
 -2 -2 -3 248.48 15.3
 -2 -2 -3 241.98 15.7
 -2 -2 -3 236.48 15.8
 -2 -2 -3 219.18 15.6
 -2 -2 -3 240.28 15.7
 -2 -2 -3 217.18 16.5
 2 2 3 252.37 15.2
 2 2 3 260.47 16.2
 2 2 3 231.98 16.4
 2 2 3 242.28 15.5
 2 2 3 228.48 15.5
 2 2 3 286.47 16.4
 2 2 3 226.28 15.4
 2 2 3 231.98 16.9
 2 2 3 246.28 15.3
 2 2 3 240.58 15.4
 2 2 3 209.68 16.4
 -1 -2 -3 4955.5 282.57
 -1 -2 -3 4682.53 283.17
 -1 -2 -3 4877.61 282.67
 -1 -2 -3 4706.73 283.67
 -1 -2 -3 4991.8 283.27
 -1 -2 -3 4707.63 283.37
 -1 -2 -3 4642.54 283.27
 -1 -2 -3 4941.61 283.47
 1 2 3 4994.1 282.67
 1 2 3 4840.72 283.77
 1 2 3 4810.42 282.67
 1 2 3 4536.45 283.67
 1 2 3 4923.81 283.27
 1 2 3 4463.35 283.67
 1 2 3 5258.27 282.57
 1 2 3 4722.63 283.27
 0 -2 -3 312.67 21.9
 0 -2 -3 343.47 22.2
 0 -2 -3 377.96 22.6
 0 -2 -3 340.07 24.1
 0 -2 -3 352.96 23
 0 -2 -3 398.26 23
 0 -2 -3 355.76 23.1
 0 -2 -3 392.56 22.1
 0 -2 -3 360.36 23
 0 2 3 371.66 22.1
 0 2 3 355.06 23.1
 0 2 3 364.86 22.5
 0 2 3 351.76 22.1
 0 2 3 397.76 23.1
 0 2 3 380.16 23
 0 2 3 344.27 21.9
 0 2 3 372.86 23
 0 2 3 352.96 23
 0 2 3 376.26 22.1
 0 2 3 316.17 24.1
 0 2 3 378.66 23
 1 -2 -3 1860.61 113.59
 1 -2 -3 2134.79 113.39
 1 -2 -3 1931.71 114.19
 1 -2 -3 1842.22 112.89
 1 -2 -3 2078.99 113.79
 1 -2 -3 1762.12 113.09
 1 -2 -3 2014.5 112.89
 1 -2 -3 1852.41 113.39
 1 -2 -3 1721.13 112.89
 1 -2 -3 1881.21 113.59
 1 -2 -3 1734.23 112.89
 1 -2 -3 1956.5 113.59
 -1 2 3 2163.48 113.49
 -1 2 3 2012.1 113.59
 -1 2 3 1977.8 113.69
 -1 2 3 1933.91 113.49
 -1 2 3 1927.61 113.49
 -1 2 3 1733.03 112.79
 -1 2 3 1953.7 113.39
 -1 2 3 1894.41 113.29
 -1 2 3 1978.5 113.19
 -1 2 3 1736.13 112.99
 -1 2 3 1808.82 113.89
 2 -2 -3 399.06 27.7
 2 -2 -3 436.86 27.3
 2 -2 -3 434.16 28
 2 -2 -3 487.95 27.1
 2 -2 -3 392.26 28.1
 2 -2 -3 430.46 28
 2 -2 -3 429.46 27.7
 2 -2 -3 405.46 27.6
 2 -2 -3 418.56 26.9
 2 -2 -3 485.15 27.9
 2 -2 -3 446.66 28.2
 2 -2 -3 443.46 28
 2 -2 -3 433.86 27.7
 -2 2 3 425.36 27.8
 -2 2 3 440.46 27.4
 -2 2 3 417.86 27.9
 -2 2 3 417.46 27.8
 -2 2 3 474.15 28.1
 -2 2 3 476.85 27.2
 -2 2 3 448.16 27.8
 -2 2 3 472.65 27.9
 -2 2 3 448.06 28
 -2 2 3 408.96 27.6
 -2 2 3 415.16 28.1
 -2 2 3 456.05 27.3
 3 -2 -3 35.2 4.9
 3 -2 -3 28.8 4.4
 3 -2 -3 22.7 4.6
 3 -2 -3 27.3 3.7
 3 -2 -3 27.1 4.6
 3 -2 -3 24 4.4
 3 -2 -3 31.4 4.5
 3 -2 -3 23.7 4
 3 -2 -3 21.3 4.1
 3 -2 -3 39 6.9
 3 -2 -3 27.4 2.9
 3 -2 -3 27.3 3.6
 -3 2 3 29.8 4.5
 -3 2 3 26.5 4.4
 -3 2 3 28.3 4
 -3 2 3 33.9 3.7
 -3 2 3 29.3 3.5
 -3 2 3 17.3 3.7
 -3 2 3 20.7 4
 -3 2 3 21.7 4
 -3 2 3 33.5 3.9
 -3 2 3 24.7 4
 -3 2 3 33.4 5
 -3 2 3 28.2 4.2
 4 -2 -3 -0.1 0.9
 4 -2 -3 2.7 2.4
 4 -2 -3 0.5 2
 4 -2 -3 1.1 2.1
 4 -2 -3 1.6 2.6
 4 -2 -3 2.1 2.1
 4 -2 -3 2.9 2.2
 4 -2 -3 2.6 1.7
 4 -2 -3 -2.5 1.9
 4 -2 -3 -0.2 1.9
 4 -2 -3 -0.4 3.3
 4 -2 -3 -0.6 1.8
 4 -2 -3 0.8 1.7
 -4 2 3 0.6 1.9
 -4 2 3 0.6 1.9
 -4 2 3 -3.5 1.5
 -4 2 3 1.1 2.3
 -4 2 3 -1.5 2
 -4 2 3 1 1.6
 -4 2 3 4.5 2.5
 -4 2 3 -1.7 1.5
 -4 2 3 3.1 2.1
 -4 2 3 0.6 2.2
 -4 2 3 -1.2 1.1
 -4 2 3 -3.1 1.8
 5 -2 -3 7.2 4.8
 5 -2 -3 6.3 3.4
 5 -2 -3 6.6 3.7
 5 -2 -3 4.8 3.1
 5 -2 -3 8.6 2.5
 5 -2 -3 7.1 3.2
 5 -2 -3 1.7 2.8
 5 -2 -3 8.5 2.6
 5 -2 -3 5.1 2.6
 5 -2 -3 12.5 4.2
 -5 2 3 5.1 2.5
 -5 2 3 5.6 2.5
 -5 2 3 9.2 3.1
 -5 2 3 8.7 3.1
 -5 2 3 3 2.9
 -5 2 3 1.6 2
 -5 2 3 10.2 3.8
 -5 2 3 7.7 2.7
 -5 2 3 9.6 3.9
 -5 2 3 6.8 2.8
 6 -2 -3 86.59 7.8
 6 -2 -3 74.69 10.1
 6 -2 -3 102.59 9.9
 6 -2 -3 70.69 9.5
 6 -2 -3 83.29 10.3
 6 -2 -3 74.29 10.8
 6 -2 -3 89.99 7.3
 6 -2 -3 94.29 13.6
 6 -2 -3 88.79 8.2
 -6 2 3 94.99 7.6
 -6 2 3 81.39 8.2
 -6 2 3 78.99 10.8
 -6 2 3 84.59 8.7
 -6 2 3 100.69 8.6
 -6 2 3 98.39 9.8
 -6 2 3 102.09 8.6
 -6 2 3 86.39 8.7
 -6 2 3 94.59 10.7
 -6 2 3 81.69 8.1
 7 -2 -3 260.67 17.6
 7 -2 -3 254.57 19.8
 7 -2 -3 245.88 19.5
 7 -2 -3 252.97 17
 7 -2 -3 255.17 19.8
 7 -2 -3 247.68 22.4
 7 -2 -3 241.38 17.6
 7 -2 -3 218.98 19.5
 7 -2 -3 228.48 20.9
 -7 2 3 259.17 20.8
 -7 2 3 234.08 18
 -7 2 3 264.67 20.3
 -7 2 3 289.67 17.4
 -7 2 3 254.87 18
 -7 2 3 257.37 18.3
 -7 2 3 240.58 18.6
 -7 2 3 268.67 18.6
 -7 2 3 243.48 19.5
 -7 2 3 253.77 18.7
 8 -2 -3 86.49 7.6
 8 -2 -3 108.39 13.4
 8 -2 -3 79.79 11.6
 8 -2 -3 95.39 12
 8 -2 -3 83.49 14.3
 8 -2 -3 81.09 8.1
 8 -2 -3 68.49 11.9
 8 -2 -3 84.79 8.3
 8 -2 -3 104.89 12.6
 -8 2 3 90.69 11.1
 -8 2 3 106.49 13.9
 -8 2 3 77.49 10.7
 -8 2 3 87.99 8.7
 -8 2 3 91.39 10.7
 -8 2 3 104.39 9.4
 -8 2 3 68.39 9.1
 -8 2 3 97.99 8.1
 -8 2 3 96.99 9.8
 9 -2 -3 -0.8 1.9
 9 -2 -3 0.6 5.7
 9 -2 -3 -2.5 2.1
 9 -2 -3 -3.2 3.4
 9 -2 -3 5.3 6.1
 9 -2 -3 2.7 4.2
 9 -2 -3 -0.6 4
 -9 2 3 -3.2 2.1
 -9 2 3 2 2.9
 -9 2 3 -3.1 2.4
 -9 2 3 5.6 4.8
 -9 2 3 -3.2 3
 -9 2 3 -3.7 3
 -9 2 3 -2.9 3.7
 -9 2 3 1.1 2.3
 10 -2 -3 91.29 12.7
 10 -2 -3 77.79 16
 10 -2 -3 71.09 13.1
 10 -2 -3 75.09 13.2
 10 -2 -3 91.09 12.7
 -10 2 3 78.19 9.6
 -10 2 3 71.49 11.5
 -10 2 3 76.59 10.8
 -10 2 3 93.69 12.8
 -10 2 3 79.29 10
 11 -2 -3 182.68 22.8
 11 -2 -3 211.98 20.2
 11 -2 -3 194.38 18.9
 11 -2 -3 213.18 22.9
 11 -2 -3 171.68 17.6
 -11 2 3 201.48 17
 -11 2 3 171.78 14.9
 -11 2 3 171.48 17.7
 -11 2 3 190.38 15.8
 12 -2 -3 1.7 5.2
 12 -2 -3 -4.8 6.7
 12 -2 -3 3.8 7
 12 -2 -3 -2.4 5.4
 12 -2 -3 -1.1 5.2
 -12 2 3 -5.6 3.8
 -12 2 3 -1.6 2.9
 -12 2 3 -1.3 4.6
 -12 2 3 4 3.6
 13 -2 -3 41.7 12.5
 13 -2 -3 51.49 10.7
 13 -2 -3 43.8 14.7
 -13 2 3 60.59 11.5
 -13 2 3 46.3 11.7
 -13 2 3 35.2 7.2
 -13 2 3 47.3 8.4
 -14 -1 -2 69.49 11.6
 -14 -1 -2 67.29 12.9
 -14 -1 -2 58.39 8.3
 14 1 2 67.89 15.1
 14 1 2 65.69 15.3
 14 1 2 59.09 15.8
 14 1 2 51.49 12.2
 -13 -1 -2 4.2 6.2
 -13 -1 -2 13.6 4.2
 -13 -1 -2 14.3 5.7
 13 1 2 26.2 10
 13 1 2 27.5 10.3
 13 1 2 8.1 8.2
 13 1 2 11.2 7
 -12 -1 -2 93.99 12.5
 -12 -1 -2 85.59 9.5
 -12 -1 -2 102.29 8.9
 -12 -1 -2 71.09 11.8
 12 1 2 53.09 12
 12 1 2 93.79 15.7
 12 1 2 77.19 12.8
 12 1 2 92.19 17.5
 12 1 2 69.99 12.6
 -11 -1 -2 169.38 14.1
 -11 -1 -2 174.88 13.4
 -11 -1 -2 152.18 12.9
 -11 -1 -2 212.38 18.2
 -11 -1 -2 172.38 16
 -11 -1 -2 191.78 14.5
 -11 -1 -2 170.08 17.1
 11 1 2 174.98 18.6
 11 1 2 168.78 17.8
 11 1 2 171.38 22.5
 11 1 2 190.78 17.4
 11 1 2 185.08 18.9
 -10 -1 -2 0.6 2.6
 -10 -1 -2 -1.9 2.7
 -10 -1 -2 0.7 3.2
 -10 -1 -2 -2.5 3.9
 -10 -1 -2 3.4 2.9
 -10 -1 -2 5 2.8
 -10 -1 -2 1.2 2
 -10 -1 -2 -0.3 2
 -10 -1 -2 4.7 4.5
 10 1 2 8.2 6
 10 1 2 4.9 4.6
 10 1 2 -1.5 4.6
 10 1 2 4.8 5.4
 10 1 2 -2.3 4.1
 10 1 2 0.2 4.4
 10 1 2 5.4 5.7
 -9 -1 -2 192.68 13.8
 -9 -1 -2 225.38 16.7
 -9 -1 -2 207.78 13.7
 -9 -1 -2 192.28 14.4
 -9 -1 -2 204.48 13.9
 -9 -1 -2 209.28 17.4
 -9 -1 -2 174.18 15.7
 -9 -1 -2 193.58 13.6
 -9 -1 -2 195.38 14.6
 -9 -1 -2 193.88 17
 9 1 2 190.48 15.4
 9 1 2 171.98 17.2
 9 1 2 199.28 17.5
 9 1 2 199.68 18.2
 9 1 2 212.88 17.3
 9 1 2 188.48 16.9
 9 1 2 178.68 17.7
 9 1 2 185.28 13.5
 9 1 2 184.78 19.1
 -8 -1 -2 191.58 14.8
 -8 -1 -2 186.98 12.6
 -8 -1 -2 201.18 15.7
 -8 -1 -2 182.68 14.6
 -8 -1 -2 190.68 13.1
 -8 -1 -2 179.18 12.5
 -8 -1 -2 180.88 15.6
 -8 -1 -2 170.38 12.5
 -8 -1 -2 170.58 12.3
 -8 -1 -2 181.68 13.4
 8 1 2 190.18 16.5
 8 1 2 160.58 15.9
 8 1 2 173.28 12.7
 8 1 2 186.88 15.3
 8 1 2 162.88 17.2
 8 1 2 169.28 15.7
 8 1 2 155.38 16
 8 1 2 191.18 15.5
 8 1 2 185.78 16.3
 8 1 2 179.48 13.9
 -7 -1 -2 53.59 5.3
 -7 -1 -2 69.99 8.8
 -7 -1 -2 61.89 7.7
 -7 -1 -2 52.49 5.5
 -7 -1 -2 70.69 5.8
 -7 -1 -2 69.29 6
 -7 -1 -2 62.29 5.5
 -7 -1 -2 57.59 6
 -7 -1 -2 78.49 8.6
 -7 -1 -2 64.49 8.4
 7 1 2 60.49 8.7
 7 1 2 73.79 10.2
 7 1 2 67.89 7.6
 7 1 2 70.59 8.7
 7 1 2 76.19 11.4
 7 1 2 69.39 8.9
 7 1 2 59.19 8.6
 7 1 2 59.99 6
 7 1 2 68.59 9.8
 7 1 2 63.49 9.9
 -6 -1 -2 186.98 12.7
 -6 -1 -2 187.38 12.4
 -6 -1 -2 184.58 12.3
 -6 -1 -2 192.08 12.6
 -6 -1 -2 203.88 14.1
 -6 -1 -2 189.78 14.6
 -6 -1 -2 189.08 12.5
 -6 -1 -2 165.08 14.2
 -6 -1 -2 166.78 13.6
 -6 -1 -2 180.18 12.9
 6 1 2 164.48 14.5
 6 1 2 200.88 14.6
 6 1 2 182.98 15.2
 6 1 2 207.08 14.6
 6 1 2 175.58 15
 6 1 2 174.28 14.7
 6 1 2 202.78 13.2
 6 1 2 184.08 16.2
 6 1 2 193.38 15.1
 6 1 2 198.08 13.5
 -5 -1 -2 38.3 4.3
 -5 -1 -2 35.8 5.4
 -5 -1 -2 34.1 3.9
 -5 -1 -2 25.6 4.2
 -5 -1 -2 31.7 4.7
 -5 -1 -2 27.5 4.8
 -5 -1 -2 37.5 3.4
 -5 -1 -2 44.8 4.4
 -5 -1 -2 37.2 4.1
 5 1 2 38.2 6.1
 5 1 2 45.1 6
 5 1 2 49.6 8.1
 5 1 2 32.6 4.5
 5 1 2 37.5 5.6
 5 1 2 31.3 5
 5 1 2 32.6 6.1
 5 1 2 30.4 4.5
 5 1 2 42 6.4
 5 1 2 42.5 4.9
 -4 -1 -2 -1.8 1.1
 -4 -1 -2 -2 0.8
 -4 -1 -2 -1.1 1.5
 -4 -1 -2 0.4 1.2
 -4 -1 -2 -0.6 1.6
 -4 -1 -2 -0.6 1.3
 -4 -1 -2 0.3 1.7
 -4 -1 -2 0 1.2
 4 1 2 -2.3 1.9
 4 1 2 0.1 0.4
 4 1 2 -1.8 2.5
 4 1 2 1.1 1.9
 4 1 2 0.7 0.8
 4 1 2 0.9 0.7
 4 1 2 -0.2 2
 4 1 2 0.6 1.8
 4 1 2 0.3 1
 4 1 2 1 1.5
 4 1 2 -1.8 1.1
 4 1 2 0.7 1.7
 4 1 2 2.7 2
 -3 -1 -2 21.8 2.9
 -3 -1 -2 22.6 2.5
 -3 -1 -2 19.3 2.7
 -3 -1 -2 24.7 3.5
 -3 -1 -2 22.1 3.2
 -3 -1 -2 22.9 3.1
 -3 -1 -2 20.9 2.8
 -3 -1 -2 22.5 2.8
 3 1 2 13.3 2.4
 3 1 2 23 4
 3 1 2 23.8 3.3
 3 1 2 19.9 3.8
 3 1 2 17 3.5
 3 1 2 12.2 2.2
 3 1 2 17.9 2.3
 3 1 2 17.2 3.1
 3 1 2 19 2
 3 1 2 19.5 3.4
 3 1 2 21.3 3.5
 3 1 2 18.8 2.7
 3 1 2 20.8 2.5
 3 1 2 23.4 5
 -2 -1 -2 107.99 7.7
 -2 -1 -2 118.29 7.8
 -2 -1 -2 115.69 7.7
 -2 -1 -2 106.89 7.4
 -2 -1 -2 111.49 7.6
 -2 -1 -2 102.29 7
 -2 -1 -2 108.99 7.3
 -2 -1 -2 100.19 8.6
 -2 -1 -2 105.79 7.6
 2 1 2 110.59 7.2
 2 1 2 118.29 7.2
 2 1 2 98.59 7.1
 2 1 2 111.39 7.7
 2 1 2 112.39 7.4
 2 1 2 116.59 8.3
 2 1 2 110.09 7.6
 2 1 2 119.29 7.8
 2 1 2 98.39 7.3
 2 1 2 104.59 7.4
 2 1 2 105.39 9
 -1 -1 -2 68.39 4.9
 -1 -1 -2 68.59 5.4
 -1 -1 -2 67.59 4.7
 -1 -1 -2 66.09 5.3
 -1 -1 -2 58.09 5.5
 -1 -1 -2 67.29 4.8
 -1 -1 -2 71.99 5.4
 -1 -1 -2 66.69 5.3
 1 1 2 64.99 5.6
 1 1 2 72.19 4.9
 1 1 2 65.09 5.2
 1 1 2 70.09 6
 1 1 2 72.69 5.4
 1 1 2 74.59 4.9
 1 1 2 74.09 4.7
 1 1 2 64.29 5.6
 1 1 2 64.29 5.2
 0 -1 -2 66.09 5.2
 0 -1 -2 64.29 5.1
 0 -1 -2 66.09 5.2
 0 -1 -2 49.3 5.4
 0 -1 -2 60.19 4.7
 0 -1 -2 63.49 4.7
 0 -1 -2 73.19 4.4
 0 -1 -2 64.79 4.9
 0 -1 -2 55.89 4.4
 0 -1 -2 63.49 4.4
 0 1 2 49.1 5.5
 0 1 2 59.19 4.6
 0 1 2 66.69 5.1
 0 1 2 69.49 4.5
 0 1 2 67.99 5
 0 1 2 60.79 5.1
 0 1 2 67.69 4.4
 0 1 2 53.49 4.1
 0 1 2 58.09 4.9
 0 1 2 56.19 4.4
 0 1 2 70.09 4.9
 1 -1 -2 1502.75 92.79
 1 -1 -2 1749.12 92.69
 1 -1 -2 1732.93 92.29
 1 -1 -2 1559.94 92.89
 1 -1 -2 1476.65 92.69
 1 -1 -2 1752.42 92.79
 1 -1 -2 1615.94 92.49
 1 -1 -2 1600.64 92.79
 1 -1 -2 1464.95 92.89
 1 -1 -2 1568.84 92.49
 -1 1 2 1782.02 92.79
 -1 1 2 1554.94 92.89
 -1 1 2 1446.56 92.89
 -1 1 2 1615.24 92.79
 -1 1 2 1605.64 92.89
 -1 1 2 1323.77 92.49
 -1 1 2 1567.24 92.89
 -1 1 2 1500.95 92.49
 -1 1 2 1472.95 92.49
 -1 1 2 1456.65 92.29
 -1 1 2 1558.34 92.69
 -1 1 2 1525.05 92.89
 2 -1 -2 152.68 10.6
 2 -1 -2 178.98 11.2
 2 -1 -2 158.78 9.7
 2 -1 -2 157.48 10.1
 2 -1 -2 146.79 10.3
 2 -1 -2 142.19 9.8
 2 -1 -2 150.08 10.6
 2 -1 -2 124.49 10.5
 2 -1 -2 153.18 10.6
 2 -1 -2 132.59 11
 -2 1 2 148.29 9.8
 -2 1 2 174.98 9.9
 -2 1 2 154.18 10.7
 -2 1 2 121.99 10.5
 -2 1 2 157.88 10.2
 -2 1 2 155.28 10.6
 -2 1 2 145.89 10.4
 -2 1 2 144.59 11.1
 -2 1 2 170.78 10.5
 -2 1 2 159.08 10.6
 -2 1 2 147.69 10.5
 -2 1 2 147.79 9.9
 -2 1 2 149.59 10.6
 3 -1 -2 2827.62 185.88
 3 -1 -2 3071.69 184.88
 3 -1 -2 3443.56 185.38
 3 -1 -2 3060.79 184.58
 3 -1 -2 3119.49 184.98
 3 -1 -2 3232.18 185.28
 3 -1 -2 3245.28 183.88
 3 -1 -2 3206.68 184.38
 3 -1 -2 3180.08 184.88
 3 -1 -2 3320.47 185.68
 -3 1 2 3176.08 185.08
 -3 1 2 3141.99 183.78
 -3 1 2 2993 185.08
 -3 1 2 3278.27 183.88
 -3 1 2 3114.29 184.88
 -3 1 2 2920.51 185.88
 -3 1 2 2855.01 185.28
 -3 1 2 3226.88 184.48
 -3 1 2 3135.89 184.78
 -3 1 2 3271.47 184.48
 -3 1 2 3080.49 184.88
 -3 1 2 3015.4 184.98
 4 -1 -2 9.4 2.4
 4 -1 -2 10.9 2.4
 4 -1 -2 16.3 3.7
 4 -1 -2 19 3.2
 4 -1 -2 10.4 2.9
 4 -1 -2 10.7 4.6
 4 -1 -2 12.3 3.2
 4 -1 -2 10.6 3.4
 4 -1 -2 16.3 2.5
 4 -1 -2 15.8 3.5
 4 -1 -2 8.8 3.2
 4 -1 -2 17.3 3.6
 -4 1 2 10.2 1.7
 -4 1 2 7.3 3
 -4 1 2 11.5 2.5
 -4 1 2 7.3 3
 -4 1 2 12.2 2.4
 -4 1 2 13.2 2.7
 -4 1 2 13.1 2.8
 -4 1 2 15.9 2.9
 -4 1 2 13.1 3.8
 -4 1 2 12.5 3
 5 -1 -2 19.9 4.4
 5 -1 -2 23.1 5
 5 -1 -2 26.1 5
 5 -1 -2 22.5 3.3
 5 -1 -2 26.5 4.5
 5 -1 -2 19.1 4.7
 5 -1 -2 12.7 5.1
 5 -1 -2 16.6 3.8
 5 -1 -2 17.3 3.2
 5 -1 -2 25.2 4.1
 5 -1 -2 22.2 3
 -5 1 2 20.7 2.3
 -5 1 2 16.6 3.4
 -5 1 2 11.3 3.7
 -5 1 2 14.1 3.2
 -5 1 2 14.5 4.3
 -5 1 2 17.4 3.6
 -5 1 2 25.7 4
 -5 1 2 17.4 3.5
 -5 1 2 23.9 4.4
 -5 1 2 21.6 3.2
 6 -1 -2 585.54 41.2
 6 -1 -2 630.04 39.1
 6 -1 -2 581.24 42.2
 6 -1 -2 643.94 39.3
 6 -1 -2 644.64 39.1
 6 -1 -2 657.23 41.6
 6 -1 -2 717.63 41.9
 6 -1 -2 634.44 41
 6 -1 -2 655.43 43.8
 6 -1 -2 647.14 40.6
 -6 1 2 628.74 40.4
 -6 1 2 650.33 39.7
 -6 1 2 658.03 39.6
 -6 1 2 636.44 42.3
 -6 1 2 627.44 39.8
 -6 1 2 689.03 38.2
 -6 1 2 659.13 39.1
 -6 1 2 561.74 40
 -6 1 2 605.54 41.1
 -6 1 2 620.64 40
 7 -1 -2 168.18 14.7
 7 -1 -2 161.98 14.5
 7 -1 -2 174.88 16.5
 7 -1 -2 143.39 14
 7 -1 -2 153.38 15.2
 7 -1 -2 170.28 11.8
 7 -1 -2 160.18 11.8
 7 -1 -2 161.28 11.8
 7 -1 -2 167.98 13.9
 -7 1 2 163.28 12.3
 -7 1 2 171.98 15.3
 -7 1 2 170.68 13.3
 -7 1 2 169.68 13
 -7 1 2 174.88 11.9
 -7 1 2 152.88 12.3
 -7 1 2 150.28 13.8
 -7 1 2 163.08 12.2
 -7 1 2 147.99 13
 -7 1 2 180.08 10.7
 8 -1 -2 15.5 3.2
 8 -1 -2 9.8 5.3
 8 -1 -2 7.3 4.8
 8 -1 -2 14.4 4.7
 8 -1 -2 6.1 6.1
 8 -1 -2 11.4 4.9
 8 -1 -2 9.6 2.9
 8 -1 -2 9.9 5.2
 8 -1 -2 5.6 2.7
 -8 1 2 12.3 3.2
 -8 1 2 10.9 3.7
 -8 1 2 13.4 2.2
 -8 1 2 12.8 3.7
 -8 1 2 5.9 2.9
 -8 1 2 11.7 3.3
 -8 1 2 14.4 4.8
 -8 1 2 13.2 4.9
 -8 1 2 16.5 4.8
 9 -1 -2 6 4.6
 9 -1 -2 3.2 4.7
 9 -1 -2 5.4 5.2
 9 -1 -2 12.5 6.3
 9 -1 -2 10.4 4.7
 9 -1 -2 5.3 2.7
 9 -1 -2 11.4 7.1
 -9 1 2 6.7 1.9
 -9 1 2 4.3 2.8
 -9 1 2 8.1 4
 -9 1 2 8.2 4.9
 -9 1 2 10.2 4.8
 -9 1 2 5.6 4
 -9 1 2 6.8 3.2
 -9 1 2 11.5 3.6
 10 -1 -2 0.4 5.7
 10 -1 -2 0.2 3.5
 10 -1 -2 5.2 5.9
 10 -1 -2 -3.1 3.3
 10 -1 -2 -3.4 4.5
 -10 1 2 1.4 3.8
 -10 1 2 2.3 2.3
 -10 1 2 0.4 2.4
 -10 1 2 0.1 3.9
 -10 1 2 -0.2 2.5
 -10 1 2 0.9 3.3
 -10 1 2 1.7 3.9
 11 -1 -2 61.79 14.4
 11 -1 -2 82.49 14
 11 -1 -2 68.39 11.1
 11 -1 -2 75.59 13.5
 11 -1 -2 60.79 11.3
 -11 1 2 75.29 9.2
 -11 1 2 82.89 12
 -11 1 2 86.19 11
 -11 1 2 72.29 8.9
 12 -1 -2 0.6 7.2
 12 -1 -2 -2.9 3.6
 12 -1 -2 8.8 6.4
 12 -1 -2 8.5 7.1
 12 -1 -2 0 7.1
 -12 1 2 -1.5 2.3
 -12 1 2 -3.1 3.9
 -12 1 2 2 3.2
 -12 1 2 0.8 4.4
 -12 1 2 8.4 5.4
 13 -1 -2 31.1 10.8
 13 -1 -2 38.4 11.7
 13 -1 -2 46.6 11
 13 -1 -2 25.8 7.9
 13 -1 -2 43.4 13.9
 -13 1 2 48.3 10.5
 -13 1 2 41.6 10.9
 -13 1 2 31.4 6
 -13 1 2 33.2 6.9
 -14 0 -1 1.9 3.5
 -14 0 -1 3.3 6.7
 -14 0 -1 9.7 6.5
 14 0 1 9.7 8.5
 14 0 1 1.3 6.9
 14 0 1 4.2 7.9
 14 0 1 6.3 8.2
 -13 0 -1 124.19 17.2
 -13 0 -1 107.89 14.7
 -13 0 -1 116.29 11
 -13 0 -1 96.79 10.4
 13 0 1 121.89 20.8
 13 0 1 122.09 19.8
 13 0 1 101.19 16.6
 13 0 1 88.69 17.3
 -12 0 -1 210.88 17.2
 -12 0 -1 247.28 22.3
 -12 0 -1 242.58 17.7
 -12 0 -1 248.18 21
 12 0 1 237.48 20.1
 12 0 1 239.48 24.3
 12 0 1 239.08 21.9
 12 0 1 272.67 24.3
 12 0 1 217.98 27.4
 -11 0 -1 -0.2 2.4
 -11 0 -1 -2.2 3.5
 -11 0 -1 -2.6 3.7
 -11 0 -1 -3.5 3.3
 -11 0 -1 -3.3 2.9
 -11 0 -1 -3.1 2.2
 11 0 1 -4.4 4.7
 11 0 1 1.4 5.7
 11 0 1 -2 3.3
 11 0 1 -7.1 3.1
 11 0 1 4.3 6
 11 0 1 0.4 4.5
 -10 0 -1 1 2.2
 -10 0 -1 6.8 3.6
 -10 0 -1 1.7 2.6
 -10 0 -1 1.3 2.4
 -10 0 -1 9.3 4.9
 -10 0 -1 1.7 3.4
 -10 0 -1 1 4.1
 -10 0 -1 5.2 3
 -10 0 -1 2.8 4
 10 0 1 0.4 4.4
 10 0 1 -2.4 4.7
 10 0 1 6.4 6.3
 10 0 1 6.6 5
 10 0 1 6.3 4.4
 10 0 1 4.4 5.9
 10 0 1 -1.5 4.4
 -9 0 -1 74.09 10.6
 -9 0 -1 74.59 7
 -9 0 -1 67.39 8.2
 -9 0 -1 70.99 8.3
 -9 0 -1 74.09 7
 -9 0 -1 73.39 7
 -9 0 -1 56.19 8.7
 -9 0 -1 60.19 9.2
 -9 0 -1 72.59 10.7
 -9 0 -1 69.59 6.3
 9 0 1 85.59 10.1
 9 0 1 77.89 10.8
 9 0 1 58.19 10
 9 0 1 98.39 12.2
 9 0 1 81.59 13.7
 9 0 1 70.69 11
 9 0 1 79.79 12.3
 9 0 1 78.19 12.6
 -8 0 -1 435.06 30.7
 -8 0 -1 467.95 31
 -8 0 -1 449.46 28.7
 -8 0 -1 464.95 29.6
 -8 0 -1 459.65 28.1
 -8 0 -1 445.96 28.8
 -8 0 -1 495.65 29.7
 -8 0 -1 436.86 28.8
 -8 0 -1 438.16 31.9
 -8 0 -1 459.45 32
 8 0 1 468.55 30.6
 8 0 1 414.16 31.5
 8 0 1 475.65 31.9
 8 0 1 450.95 33.6
 8 0 1 475.85 31.9
 8 0 1 431.16 32.5
 8 0 1 433.96 32.4
 8 0 1 457.55 33.3
 -7 0 -1 1.7 1.5
 -7 0 -1 -0.6 2.3
 -7 0 -1 1.7 1.9
 -7 0 -1 1.1 1.3
 -7 0 -1 0.3 1.7
 -7 0 -1 0 2.5
 -7 0 -1 1.3 2.7
 -7 0 -1 0.4 1.5
 -7 0 -1 -0.5 2
 -7 0 -1 0 2.7
 7 0 1 -0.7 1.8
 7 0 1 -2 2.8
 7 0 1 2.7 2.9
 7 0 1 0.8 2.8
 7 0 1 -0.2 2
 7 0 1 0.7 2.8
 7 0 1 -1 3.4
 7 0 1 -5.2 2.8
 7 0 1 0.6 1.4
 7 0 1 0.3 1.2
 7 0 1 -0.8 1.3
 7 0 1 -0.4 3
 -6 0 -1 15.2 2.8
 -6 0 -1 15 2.3
 -6 0 -1 10.4 2.9
 -6 0 -1 10.8 2.4
 -6 0 -1 16.5 2.9
 -6 0 -1 10.4 3.7
 -6 0 -1 13.9 3.9
 -6 0 -1 12.9 3
 -6 0 -1 11.7 3.5
 -6 0 -1 16.9 4
 6 0 1 17.4 4.1
 6 0 1 9.2 2.3
 6 0 1 12.7 4.1
 6 0 1 12.9 4.2
 6 0 1 10.8 2.3
 6 0 1 12.5 2.3
 6 0 1 11.3 4.5
 6 0 1 6 3.7
 6 0 1 8.4 4.4
 6 0 1 7.2 2.9
 6 0 1 12.9 2.7
 6 0 1 18.1 4.6
 -5 0 -1 156.28 10.4
 -5 0 -1 148.69 10.3
 -5 0 -1 132.69 11.1
 -5 0 -1 137.79 11
 -5 0 -1 151.88 11.9
 -5 0 -1 148.69 10
 -5 0 -1 147.19 9.6
 -5 0 -1 139.69 9.9
 -5 0 -1 151.58 10
 -5 0 -1 142.89 11.7
 5 0 1 143.59 9.8
 5 0 1 143.39 9.7
 5 0 1 139.99 10
 5 0 1 158.68 13.3
 5 0 1 153.78 10
 5 0 1 150.68 12.1
 5 0 1 153.68 11.6
 5 0 1 130.69 11.1
 5 0 1 135.59 11.9
 5 0 1 128.59 11.7
 5 0 1 144.19 12.3
 5 0 1 149.69 9.9
 5 0 1 164.78 12.8
 5 0 1 138.59 11.6
 5 0 1 155.28 11
 -4 0 -1 513.65 30.9
 -4 0 -1 522.45 31.2
 -4 0 -1 520.25 32.2
 -4 0 -1 505.05 32.7
 -4 0 -1 540.45 31.6
 -4 0 -1 525.55 31.4
 -4 0 -1 543.95 31.3
 -4 0 -1 495.55 32.6
 -4 0 -1 492.35 32.1
 -4 0 -1 510.35 31.2
 4 0 1 533.15 32
 4 0 1 551.74 34
 4 0 1 513.25 33
 4 0 1 511.95 31.2
 4 0 1 483.55 33
 4 0 1 504.95 31.1
 4 0 1 500.85 32.8
 4 0 1 543.35 32.7
 4 0 1 470.15 32.1
 4 0 1 466.85 32.7
 4 0 1 557.64 31.5
 4 0 1 502.65 31.3
 4 0 1 508.05 31
 -3 0 -1 37.3 3.4
 -3 0 -1 33.7 3.4
 -3 0 -1 40.4 3.6
 -3 0 -1 41.1 4.3
 -3 0 -1 36.2 4.3
 -3 0 -1 46 5
 -3 0 -1 39.8 3.4
 -3 0 -1 43.2 4.5
 -3 0 -1 34.5 3.2
 3 0 1 37 3.4
 3 0 1 39.6 3.4
 3 0 1 39.6 4.5
 3 0 1 32.2 3.1
 3 0 1 44.8 5.6
 3 0 1 51.89 5.5
 3 0 1 30.8 4.5
 3 0 1 44.7 6
 3 0 1 33.9 3.5
 -2 0 -1 3151.18 180.88
 -2 0 -1 3122.19 180.38
 -2 0 -1 3046.6 180.78
 -2 0 -1 3050.89 180.58
 -2 0 -1 2940.61 180.98
 -2 0 -1 3059.49 181.28
 -2 0 -1 3150.48 180.68
 -2 0 -1 3106.79 181.18
 -2 0 -1 3151.98 180.68
 2 0 1 3101.69 180.48
 2 0 1 3179.08 181.38
 2 0 1 2833.72 180.88
 2 0 1 3088.79 181.08
 2 0 1 3094.09 180.58
 2 0 1 3064.39 180.68
 2 0 1 3036.1 180.68
 2 0 1 3274.07 182.18
 2 0 1 2947.31 181.18
 -1 0 -1 163.98 10
 -1 0 -1 167.18 10
 -1 0 -1 167.68 9.6
 -1 0 -1 154.28 9.8
 -1 0 -1 147.59 9.8
 -1 0 -1 154.98 9.8
 -1 0 -1 165.98 9.7
 -1 0 -1 157.98 9.7
 -1 0 -1 154.58 9.8
 1 0 1 167.18 10.6
 1 0 1 164.58 10
 1 0 1 160.98 9.9
 1 0 1 155.48 9.7
 1 0 1 126.39 9.7
 1 0 1 148.69 9.8
 1 0 1 148.39 9.7
 1 0 1 156.68 9.8
 1 0 1 158.78 9.6
 0 0 -1 768.92 46.6
 0 0 -1 760.92 46.8
 0 0 -1 825.52 46.9
 0 0 -1 822.92 46.9
 0 0 -1 837.82 46.7
 0 0 1 727.93 46.6
 0 0 1 766.92 46.8
 0 0 1 825.22 46.6
 0 0 1 834.02 46.9
 0 0 1 743.53 46.7
 1 0 -1 768.82 48.3
 1 0 -1 888.91 48
 1 0 -1 840.02 48.1
 1 0 -1 809.22 48.2
 1 0 -1 821.22 48.3
 1 0 -1 816.22 48.2
 -1 0 1 802.52 48.2
 -1 0 1 813.12 48.3
 -1 0 1 852.41 48
 -1 0 1 784.62 48.3
 -1 0 1 858.51 48.1
 -1 0 1 798.72 48.2
 -1 0 1 839.02 48.1
 -1 0 1 696.53 48.4
 -1 0 1 794.02 48.2
 2 0 -1 1125.49 62.59
 2 0 -1 1037.6 63.09
 2 0 -1 1032.6 62.49
 2 0 -1 1121.79 62.59
 2 0 -1 1098.29 62.89
 2 0 -1 1012.4 62.69
 2 0 -1 941.31 63.49
 2 0 -1 1099.29 62.69
 -2 0 1 1022 62.59
 -2 0 1 1019.9 62.69
 -2 0 1 1206.88 62.59
 -2 0 1 1086.79 62.69
 -2 0 1 935.41 63.39
 -2 0 1 1016.3 62.69
 -2 0 1 1098.99 62.69
 -2 0 1 1055.09 63.09
 3 0 -1 8783.92 472.75
 3 0 -1 8293.87 472.65
 3 0 -1 7976.9 471.85
 3 0 -1 8144.69 472.65
 3 0 -1 8161.08 473.05
 3 0 -1 8850.11 472.95
 3 0 -1 8290.27 472.95
 3 0 -1 7194.18 473.15
 3 0 -1 8260.77 472.55
 -3 0 1 8632.04 472.85
 -3 0 1 7487.95 472.75
 -3 0 1 7352.26 473.15
 -3 0 1 7959.6 472.75
 -3 0 1 8002.5 472.75
 -3 0 1 7955.4 471.75
 -3 0 1 6968.9 472.55
 -3 0 1 8579.74 473.85
 -3 0 1 8073.99 472.45
 4 0 -1 2731.43 158.58
 4 0 -1 2660.23 157.48
 4 0 -1 2724.93 158.68
 4 0 -1 2620.44 157.18
 4 0 -1 2716.43 157.18
 4 0 -1 2641.34 157.38
 4 0 -1 2725.93 158.38
 4 0 -1 2832.32 158.98
 4 0 -1 2893.61 160.48
 4 0 -1 2766.52 158.88
 4 0 -1 2366.86 159.18
 -4 0 1 2699.73 158.28
 -4 0 1 2797.52 157.68
 -4 0 1 2764.92 157.48
 -4 0 1 2615.04 157.38
 -4 0 1 2870.91 157.38
 -4 0 1 2372.46 158.48
 -4 0 1 2586.44 157.38
 -4 0 1 2491.25 159.28
 -4 0 1 2572.54 157.48
 5 0 -1 83.69 6.4
 5 0 -1 89.39 8.4
 5 0 -1 79.79 8.8
 5 0 -1 84.99 8
 5 0 -1 86.19 8.4
 5 0 -1 86.59 6.7
 5 0 -1 87.29 9.4
 5 0 -1 86.49 8.6
 5 0 -1 87.39 6.3
 5 0 -1 84.59 7.7
 5 0 -1 91.19 7.8
 5 0 -1 84.79 6.5
 -5 0 1 96.49 6.8
 -5 0 1 76.99 8
 -5 0 1 97.09 7.2
 -5 0 1 93.79 6.8
 -5 0 1 87.59 8.9
 -5 0 1 92.99 6.8
 -5 0 1 84.49 6.7
 -5 0 1 96.29 7.8
 -5 0 1 93.99 6.9
 6 0 -1 814.62 57.39
 6 0 -1 863.61 60.69
 6 0 -1 970 59.99
 6 0 -1 991.6 60.59
 6 0 -1 964 57.39
 6 0 -1 928.31 59.39
 6 0 -1 1005.3 60.69
 6 0 -1 1011.8 59.39
 6 0 -1 995.4 58.09
 6 0 -1 1016.2 62.29
 6 0 -1 982 60.49
 -6 0 1 997.6 59.29
 -6 0 1 1039.7 57.99
 -6 0 1 941.11 57.99
 -6 0 1 969.1 58.09
 -6 0 1 1014.8 58.49
 -6 0 1 874.81 59.69
 -6 0 1 998.7 57.99
 -6 0 1 931.61 60.79
 -6 0 1 956 57.89
 7 0 -1 351.96 25.6
 7 0 -1 346.17 25.8
 7 0 -1 382.26 27.7
 7 0 -1 345.77 21.7
 7 0 -1 320.17 26
 7 0 -1 367.36 25.1
 7 0 -1 336.17 25.5
 7 0 -1 353.36 24.5
 -7 0 1 344.77 22.8
 -7 0 1 327.37 24.7
 -7 0 1 371.26 23.4
 -7 0 1 385.66 22.7
 -7 0 1 357.36 26.1
 -7 0 1 361.26 24.1
 -7 0 1 354.86 22.9
 -7 0 1 365.96 22.8
 -7 0 1 352.26 22.7
 8 0 -1 24.4 5.2
 8 0 -1 23.2 5.8
 8 0 -1 42.2 9.3
 8 0 -1 24.4 5.9
 8 0 -1 26.1 7.2
 8 0 -1 20.9 6.5
 8 0 -1 34 7.6
 -8 0 1 25.6 4.1
 -8 0 1 18.9 6
 -8 0 1 21.1 4
 -8 0 1 28 5
 -8 0 1 27.7 4.3
 -8 0 1 31.3 5.6
 -8 0 1 26 5.8
 -8 0 1 21.9 3.6
 -8 0 1 25.3 4
 9 0 -1 692.73 48.3
 9 0 -1 704.93 48.6
 9 0 -1 730.13 46.6
 9 0 -1 673.43 48.9
 9 0 -1 668.93 47.6
 9 0 -1 707.03 47.4
 9 0 -1 706.93 50.19
 -9 0 1 734.73 48.8
 -9 0 1 696.03 45.8
 -9 0 1 683.33 44
 -9 0 1 698.43 47.2
 -9 0 1 757.02 45.3
 -9 0 1 738.23 44.5
 -9 0 1 794.92 43.9
 -9 0 1 703.23 44
 -9 0 1 676.73 44.3
 10 0 -1 8.4 4.9
 10 0 -1 -0.9 4.9
 10 0 -1 0.6 4.6
 10 0 -1 1.5 4.8
 10 0 -1 5.8 4.4
 10 0 -1 6.3 5.5
 -10 0 1 4.6 4.1
 -10 0 1 0.8 2.3
 -10 0 1 13.1 3.3
 -10 0 1 9.3 3
 -10 0 1 4.1 3.3
 -10 0 1 3.2 4.6
 -10 0 1 4.6 3.9
 -10 0 1 5.3 2.3
 11 0 -1 12 6.1
 11 0 -1 27.1 6.7
 11 0 -1 12.2 5.9
 11 0 -1 15.1 7.6
 11 0 -1 18.6 8.4
 11 0 -1 14.7 8.2
 -11 0 1 14.2 6.3
 -11 0 1 29.5 7.2
 -11 0 1 22.3 4.6
 -11 0 1 16.9 5.9
 -11 0 1 20.5 4.3
 12 0 -1 97.59 17.9
 12 0 -1 87.89 16.2
 12 0 -1 99.69 16.7
 12 0 -1 104.19 13.6
 12 0 -1 72.19 13
 -12 0 1 107.49 16.2
 -12 0 1 96.29 9
 -12 0 1 96.59 13.5
 -12 0 1 89.59 10.2
 -12 0 1 103.09 12.4
 13 0 -1 5.7 5.7
 13 0 -1 4.5 7.3
 13 0 -1 9.1 7.1
 13 0 -1 6.2 7.1
 13 0 -1 8.3 8.4
 -13 0 1 3.3 4.9
 -13 0 1 -0.1 2.8
 -13 0 1 3.3 4.7
 -13 0 1 5 3.4
 14 0 -1 62.29 11.5
 14 0 -1 101.09 16.5
 14 0 -1 79.69 16.7
 14 0 -1 65.99 14.9
 14 0 -1 46.7 14.3
 -14 0 1 67.69 13.6
 -14 0 1 71.49 12.7
 -14 0 1 61.29 8.8
 -13 1 0 163.38 20.9
 -13 1 0 150.08 13.6
 -13 1 0 199.58 18.3
 -13 1 0 151.98 13.7
 13 -1 0 140.09 17.6
 13 -1 0 158.98 24.1
 13 -1 0 137.79 21.5
 13 -1 0 168.98 23.5
 -12 1 0 10.6 6
 -12 1 0 9.8 4
 -12 1 0 -0.3 2.7
 -12 1 0 17.1 6.8
 12 -1 0 3.4 5
 12 -1 0 10.3 8.8
 12 -1 0 -3.9 6.3
 12 -1 0 16.8 6.5
 12 -1 0 6.4 7.4
 -11 1 0 9.5 4.6
 -11 1 0 5.1 4.8
 -11 1 0 5.6 3.2
 -11 1 0 5.7 3.1
 -11 1 0 10.1 5.7
 11 -1 0 -3.3 5.4
 11 -1 0 0.5 4.9
 11 -1 0 4.2 6.3
 11 -1 0 -7.1 6
 11 -1 0 3.1 4.1
 -10 1 0 -1.7 3.5
 -10 1 0 1.5 3.6
 -10 1 0 -1.8 2.1
 -10 1 0 -1.7 2.9
 -10 1 0 0.5 2.4
 -10 1 0 -1.6 2.7
 -10 1 0 0.9 3.9
 -10 1 0 1.5 3.2
 10 -1 0 6.8 5.2
 10 -1 0 10.2 7.2
 10 -1 0 4.7 4.8
 10 -1 0 6.5 4.4
 10 -1 0 -8.7 4.1
 10 -1 0 1.6 5.9
 -9 1 0 236.98 17
 -9 1 0 240.78 19
 -9 1 0 241.18 15.6
 -9 1 0 234.28 16.8
 -9 1 0 233.68 20.4
 -9 1 0 272.07 17.8
 -9 1 0 241.38 19.3
 -9 1 0 231.68 17.8
 -9 1 0 241.38 15.4
 -9 1 0 221.18 19.9
 9 -1 0 225.88 16.6
 9 -1 0 248.38 20.1
 9 -1 0 224.08 21.5
 9 -1 0 222.18 18.5
 9 -1 0 227.98 19.5
 9 -1 0 224.48 21.1
 9 -1 0 230.68 20.7
 9 -1 0 243.58 22.1
 -8 1 0 -0.4 3.1
 -8 1 0 8.6 2.9
 -8 1 0 7.9 2.8
 -8 1 0 8.8 4.9
 -8 1 0 11.1 2.6
 -8 1 0 9.4 4
 -8 1 0 7.1 2.9
 -8 1 0 7.5 3.8
 -8 1 0 5.3 3.4
 -8 1 0 7.5 2.2
 -8 1 0 3.2 3
 8 -1 0 6.7 4.7
 8 -1 0 8 5.9
 8 -1 0 8.9 6.1
 8 -1 0 8.3 4.8
 8 -1 0 9.6 4.7
 8 -1 0 9.3 3.9
 8 -1 0 9.6 4.1
 8 -1 0 8 5.1
 8 -1 0 7.6 2.8
 -7 1 0 240.38 18.6
 -7 1 0 260.37 17.1
 -7 1 0 268.47 20.1
 -7 1 0 252.77 17.8
 -7 1 0 257.77 17.1
 -7 1 0 259.97 16.4
 -7 1 0 267.87 17.5
 -7 1 0 238.38 17
 -7 1 0 250.57 15.9
 -7 1 0 239.38 19.3
 7 -1 0 267.57 21.4
 7 -1 0 251.87 16.7
 7 -1 0 262.77 19.5
 7 -1 0 249.78 19.6
 7 -1 0 223.08 19.5
 7 -1 0 262.57 20.8
 7 -1 0 212.88 19.6
 7 -1 0 242.88 18.4
 7 -1 0 251.57 17.5
 7 -1 0 274.77 19.5
 7 -1 0 233.58 16.9
 -6 1 0 16.4 4.5
 -6 1 0 20.6 3.1
 -6 1 0 22.2 3.7
 -6 1 0 25.4 3.8
 -6 1 0 21.5 4.1
 -6 1 0 25.7 4.2
 -6 1 0 25.1 3.9
 -6 1 0 23.6 2.7
 -6 1 0 17.8 4.4
 6 -1 0 22 4
 6 -1 0 25.9 4
 6 -1 0 31.6 6.3
 6 -1 0 28.6 6.8
 6 -1 0 11.4 4
 6 -1 0 22.8 5.9
 6 -1 0 27.9 5.4
 6 -1 0 38.2 7.7
 6 -1 0 23.5 3.8
 6 -1 0 15.2 4.3
 6 -1 0 23.9 3.6
 6 -1 0 16.4 4.1
 -5 1 0 0.4 1.9
 -5 1 0 2.4 2.2
 -5 1 0 3.3 1.2
 -5 1 0 4.1 1.7
 -5 1 0 5.2 2.2
 -5 1 0 4.3 2.6
 -5 1 0 6 2.1
 -5 1 0 1.8 1.7
 5 -1 0 4.9 2.9
 5 -1 0 3.5 1.9
 5 -1 0 2 1.8
 5 -1 0 3.3 1.7
 5 -1 0 -0.7 2.7
 5 -1 0 1.6 2
 5 -1 0 2.9 2.9
 5 -1 0 1 2
 5 -1 0 0.3 2.5
 5 -1 0 4.3 1.8
 5 -1 0 1.7 3.2
 5 -1 0 5.3 3.9
 5 -1 0 4.4 1.9
 5 -1 0 2.9 2.4
 -4 1 0 446.96 25.8
 -4 1 0 439.76 27.1
 -4 1 0 420.06 27.6
 -4 1 0 445.96 26.7
 -4 1 0 404.86 26.6
 -4 1 0 451.85 26.1
 -4 1 0 415.06 28.1
 -4 1 0 430.86 26.6
 -4 1 0 456.05 26.8
 4 -1 0 384.26 27.5
 4 -1 0 409.96 26.6
 4 -1 0 436.96 27.6
 4 -1 0 452.95 26.9
 4 -1 0 388.86 28.2
 4 -1 0 400.86 27.8
 4 -1 0 429.56 27.7
 4 -1 0 416.86 26.6
 4 -1 0 411.36 26.6
 4 -1 0 479.55 29
 4 -1 0 395.26 28
 4 -1 0 505.25 29.7
 4 -1 0 450.95 28
 4 -1 0 427.96 26.8
 -3 1 0 167.88 13.2
 -3 1 0 198.88 13.7
 -3 1 0 194.48 13.2
 -3 1 0 205.98 12.6
 -3 1 0 189.68 12.8
 -3 1 0 185.88 12.5
 -3 1 0 197.88 12.6
 -3 1 0 206.68 11.7
 -3 1 0 193.28 12
 -3 1 0 195.08 12.5
 3 -1 0 179.78 13.1
 3 -1 0 221.68 14.4
 3 -1 0 184.48 13.1
 3 -1 0 198.48 12.7
 3 -1 0 177.38 13.7
 3 -1 0 184.98 12.5
 3 -1 0 205.88 12.6
 3 -1 0 189.58 12.5
 3 -1 0 217.68 14.5
 3 -1 0 188.78 12.5
 3 -1 0 189.58 13.3
 3 -1 0 177.28 13.4
 3 -1 0 185.58 11.7
 -2 1 0 5.8 2
 -2 1 0 7.9 1.9
 -2 1 0 8.9 1.3
 -2 1 0 8.1 1.8
 -2 1 0 6.4 1.6
 -2 1 0 7.5 2.2
 -2 1 0 8.9 1.8
 -2 1 0 9.8 1.7
 -2 1 0 9.2 1
 -2 1 0 7.7 1.9
 2 -1 0 7.6 1.7
 2 -1 0 8.4 1.9
 2 -1 0 7.8 1.7
 2 -1 0 7.5 2.4
 2 -1 0 10.7 1.8
 2 -1 0 9.8 2.1
 2 -1 0 7.9 1.7
 -1 1 0 2973.9 175.08
 -1 1 0 3059.99 174.88
 -1 1 0 3070.49 174.48
 -1 1 0 2918.71 174.68
 -1 1 0 3151.08 174.98
 -1 1 0 2868.71 174.88
 -1 1 0 3022.6 174.68
 -1 1 0 2936.41 174.68
 -1 1 0 3017.9 174.68
 -1 1 0 3078.09 174.78
 -1 1 0 2681.23 175.38
 1 -1 0 3049.69 174.48
 1 -1 0 2969.2 174.68
 1 -1 0 2977.8 174.98
 1 -1 0 3034 174.48
 1 -1 0 3045.4 174.78
 1 -1 0 2681.53 174.98
 1 -1 0 2933.71 174.78
 1 -1 0 3081.39 174.68
 0 1 0 533.15 29.6
 0 1 0 507.55 29.5
 0 1 0 491.95 29.5
 0 1 0 477.55 29.6
 0 1 0 444.26 29.3
 0 1 0 537.35 30.1
 0 1 0 453.05 29.5
 0 1 0 543.35 29.7
 0 -1 0 495.65 29.6
 0 -1 0 457.65 29.3
 0 -1 0 542.45 29.5
 0 -1 0 519.55 29.5
 0 -1 0 484.85 29.5
 0 -1 0 483.55 29.9
 0 -1 0 483.15 29.5
 1 1 0 358.96 25.2
 1 1 0 430.26 25.3
 1 1 0 488.45 25.2
 1 1 0 445.56 25
 1 1 0 379.56 25.7
 1 1 0 437.36 24.6
 -1 -1 0 420.46 24.6
 -1 -1 0 433.06 24.7
 -1 -1 0 406.36 25
 -1 -1 0 450.35 24.7
 -1 -1 0 379.96 25.2
 -1 -1 0 384.56 25.7
 2 1 0 813.02 49.8
 2 1 0 879.81 49.2
 2 1 0 816.72 49.9
 -2 -1 0 806.22 49.3
 3 1 0 1143.99 68.89
 3 1 0 1154.08 69.19
 3 1 0 1234.58 67.89
 -3 -1 0 1018.2 68.89
 -3 -1 0 1129.39 68.49
 -3 -1 0 1187.38 68.19
 4 1 0 4.1 2.2
 4 1 0 1.4 1.5
 4 1 0 2.9 2.2
 4 1 0 2.5 2.2
 4 1 0 3.8 1.3
 4 1 0 0.9 2.2
 4 1 0 4.6 2.7
 -4 -1 0 3.4 2.1
 -4 -1 0 0.5 1.2
 -4 -1 0 0.2 1.9
 -4 -1 0 2.3 1
 -4 -1 0 3.6 1.2
 -4 -1 0 1.7 1.9
 5 1 0 3.3 2.4
 5 1 0 1.3 2.6
 5 1 0 2 2.4
 5 1 0 4.6 2.8
 5 1 0 1.2 2
 5 1 0 1.3 2.1
 5 1 0 1.1 1.2
 5 1 0 1.2 3
 5 1 0 3 2.8
 5 1 0 4.4 2.1
 -5 -1 0 2.8 2.7
 -5 -1 0 0.7 1.1
 -5 -1 0 -0.4 1.7
 -5 -1 0 1.5 2
 -5 -1 0 1.2 1.5
 -5 -1 0 1.3 1.3
 6 1 0 355.06 26.7
 6 1 0 366.66 25.1
 6 1 0 413.26 26.4
 6 1 0 386.66 27.4
 6 1 0 399.66 27.2
 6 1 0 412.66 23.6
 6 1 0 392.96 26.7
 6 1 0 389.96 26.5
 6 1 0 372.76 26.3
 -6 -1 0 385.96 25.2
 -6 -1 0 396.76 24.3
 -6 -1 0 366.26 23.6
 -6 -1 0 398.46 24
 -6 -1 0 377.46 26.7
 -6 -1 0 381.56 23.7
 -6 -1 0 354.76 25.6
 7 1 0 1.1 2.9
 7 1 0 9.3 4
 7 1 0 0.3 3.2
 7 1 0 2.3 3
 7 1 0 7.6 3.7
 7 1 0 4 3.8
 7 1 0 3.8 2.6
 7 1 0 4.6 1.5
 7 1 0 6.1 4.5
 -7 -1 0 5.8 2.2
 -7 -1 0 6.7 2.3
 -7 -1 0 7.4 2
 -7 -1 0 4.6 3.2
 -7 -1 0 7.7 3
 -7 -1 0 1.9 2.4
 -7 -1 0 2.5 1.5
 8 1 0 110.39 11
 8 1 0 98.89 9.8
 8 1 0 96.49 11
 8 1 0 108.39 14.4
 8 1 0 116.19 14.6
 8 1 0 125.59 14.3
 8 1 0 94.29 12.5
 8 1 0 130.19 13.8
 -8 -1 0 114.99 8.3
 -8 -1 0 117.59 8.9
 -8 -1 0 107.29 8.1
 -8 -1 0 110.99 8.8
 -8 -1 0 102.89 10.6
 -8 -1 0 105.29 11.5
 -8 -1 0 100.39 8.1
 -8 -1 0 108.99 9.8
 9 1 0 114.09 15
 9 1 0 113.39 13.9
 9 1 0 103.39 11.2
 9 1 0 98.99 9.9
 9 1 0 103.79 13.9
 9 1 0 86.79 11.8
 9 1 0 88.39 13.9
 -9 -1 0 102.79 8.8
 -9 -1 0 113.89 9.4
 -9 -1 0 111.39 12.5
 -9 -1 0 92.79 7.9
 -9 -1 0 78.89 10.8
 -9 -1 0 99.69 8.6
 -9 -1 0 108.09 10.1
 -9 -1 0 92.19 7.8
 -9 -1 0 99.49 8.1
 -9 -1 0 105.39 13.5
 10 1 0 357.66 28.9
 10 1 0 375.36 30.5
 10 1 0 412.06 30.1
 10 1 0 396.86 27.8
 10 1 0 435.26 31.7
 10 1 0 444.76 32.6
 -10 -1 0 347.37 29.6
 -10 -1 0 429.06 27.8
 -10 -1 0 352.16 25.1
 -10 -1 0 396.66 28.5
 -10 -1 0 393.66 29.8
 -10 -1 0 427.86 26.6
 -10 -1 0 364.46 28.5
 -10 -1 0 388.36 25.5
 -10 -1 0 421.36 26
 -10 -1 0 415.46 26.6
 11 1 0 9.4 5.1
 11 1 0 10.9 7.4
 11 1 0 14.3 7.4
 11 1 0 13.6 5.8
 11 1 0 9.2 4.6
 11 1 0 1.4 5.8
 -11 -1 0 2 3.7
 -11 -1 0 16 6.1
 -11 -1 0 14.2 5.8
 -11 -1 0 12.1 5.1
 -11 -1 0 7.7 3.5
 -11 -1 0 12 3.1
 -11 -1 0 11.8 3.3
 12 1 0 110.39 17.3
 12 1 0 127.79 19.6
 12 1 0 95.99 14.8
 12 1 0 135.39 17.3
 12 1 0 124.99 18.2
 12 1 0 117.39 14.3
 -12 -1 0 142.39 18.1
 -12 -1 0 128.69 15.9
 -12 -1 0 121.99 12.2
 -12 -1 0 112.29 10
 13 1 0 14.6 7.3
 13 1 0 13.7 7
 13 1 0 25.3 6.6
 13 1 0 11.1 7.9
 13 1 0 4 6.1
 13 1 0 9.2 7.1
 -13 -1 0 17.9 7.4
 -13 -1 0 4.9 5.2
 -13 -1 0 13 4
 14 1 0 54.39 11.5
 14 1 0 52.39 11.7
 14 1 0 45.7 12.7
 14 1 0 71.39 11.7
 14 1 0 82.49 16.6
 14 1 0 52.29 13.7
 -14 -1 0 56.99 12
 -14 -1 0 64.79 8.1
 -14 -1 0 42.9 10.5
 -13 2 1 6.7 4.1
 -13 2 1 2.7 5.2
 -13 2 1 11.8 6.2
 -13 2 1 0 3.2
 13 -2 -1 3.9 7.6
 13 -2 -1 5.5 8.4
 13 -2 -1 4 5.9
 13 -2 -1 1.6 6.8
 -12 2 1 50.59 11.3
 -12 2 1 35.1 6.7
 -12 2 1 32.7 6.7
 -12 2 1 40.8 9.5
 12 -2 -1 52.89 13.6
 12 -2 -1 20 10.2
 12 -2 -1 43.9 9.6
 12 -2 -1 28.2 11.6
 -11 2 1 -2.9 4
 -11 2 1 1 2.8
 -11 2 1 -4 4.2
 -11 2 1 -1.1 5.7
 -11 2 1 -3.1 3.5
 -11 2 1 -3 2.5
 11 -2 -1 -1.9 6.2
 11 -2 -1 -4.8 5.6
 11 -2 -1 1.3 7
 11 -2 -1 3.1 4.7
 -10 2 1 63.59 8
 -10 2 1 81.29 9.3
 -10 2 1 52.09 10.6
 -10 2 1 60.69 8.3
 -10 2 1 53.29 9.2
 -10 2 1 63.49 11.4
 10 -2 -1 35.3 10.6
 10 -2 -1 74.69 13.7
 10 -2 -1 50.99 11.2
 10 -2 -1 57.99 9.4
 -9 2 1 20.4 5.9
 -9 2 1 20.9 6.6
 -9 2 1 27.4 7.3
 -9 2 1 20.9 4.7
 -9 2 1 27.9 5.5
 -9 2 1 16.5 5.2
 -9 2 1 24.3 5.2
 9 -2 -1 30.7 7.5
 9 -2 -1 30.3 9
 9 -2 -1 16 4.1
 9 -2 -1 16.2 5.6
 9 -2 -1 16.8 5.5
 9 -2 -1 11.1 6.9
 9 -2 -1 16.3 7.7
 -8 2 1 431.46 28.6
 -8 2 1 434.66 28.5
 -8 2 1 412.66 28.6
 -8 2 1 452.45 26.7
 -8 2 1 400.16 30.1
 -8 2 1 432.76 31.7
 -8 2 1 440.46 29.6
 -8 2 1 453.25 28.9
 8 -2 -1 438.16 33.8
 8 -2 -1 468.05 30.8
 8 -2 -1 418.66 32.3
 8 -2 -1 416.76 30.7
 8 -2 -1 474.25 31.5
 8 -2 -1 401.86 32.1
 8 -2 -1 414.56 28.2
 8 -2 -1 473.95 32.3
 8 -2 -1 425.06 28.1
 -7 2 1 1 2.1
 -7 2 1 3.1 2.9
 -7 2 1 -2.1 2.5
 -7 2 1 -0.3 3.1
 -7 2 1 0.7 2
 -7 2 1 1.6 1.9
 -7 2 1 3.7 2.9
 -7 2 1 0.5 1.5
 7 -2 -1 -1.1 2
 7 -2 -1 0.2 1.8
 7 -2 -1 -1.9 2.7
 7 -2 -1 1.7 3.4
 7 -2 -1 -2.7 2.2
 7 -2 -1 -1.6 4.1
 7 -2 -1 -2.4 2.9
 7 -2 -1 -0.3 3.1
 7 -2 -1 3.4 3.9
 7 -2 -1 3 4.3
 -6 2 1 1021.2 63.79
 -6 2 1 1080.79 63.29
 -6 2 1 1014.2 63.09
 -6 2 1 1045.6 65.59
 -6 2 1 1005.4 64.39
 -6 2 1 1005.8 64.49
 -6 2 1 1055.49 61.69
 -6 2 1 1039.7 63.09
 -6 2 1 1033 63.19
 6 -2 -1 923.51 65.49
 6 -2 -1 1060.89 64.59
 6 -2 -1 1066.49 63.59
 6 -2 -1 1090.19 64.99
 6 -2 -1 1044.2 65.29
 6 -2 -1 1033.3 62.99
 6 -2 -1 1057.09 63.29
 6 -2 -1 1010.6 61.59
 6 -2 -1 1067.59 67.29
 6 -2 -1 1115.79 66.09
 6 -2 -1 1017.4 65.09
 6 -2 -1 993.8 64.59
 -5 2 1 3.9 2.2
 -5 2 1 4.2 2.2
 -5 2 1 -1.1 1.9
 -5 2 1 1.1 2
 -5 2 1 1.1 1.2
 -5 2 1 0.4 1.5
 -5 2 1 0.8 2.4
 -5 2 1 1.1 1.8
 -5 2 1 1.2 2.1
 5 -2 -1 1.7 2.5
 5 -2 -1 -1 1.5
 5 -2 -1 -2.6 2.4
 5 -2 -1 1.5 2.5
 5 -2 -1 0.9 2
 5 -2 -1 -0.3 2.8
 5 -2 -1 -2.2 3.6
 5 -2 -1 0.2 1.8
 5 -2 -1 -0.4 2.6
 5 -2 -1 -0.2 1
 5 -2 -1 2.2 3.1
 5 -2 -1 -3.2 2.3
 5 -2 -1 0.8 2.1
 -4 2 1 -0.8 1.4
 -4 2 1 -3.1 1.8
 -4 2 1 -0.9 1.6
 -4 2 1 0.9 1.6
 -4 2 1 -0.8 1.5
 -4 2 1 0.6 1.9
 -4 2 1 0.1 1.8
 -4 2 1 -1.3 1
 -4 2 1 2.3 2.1
 4 -2 -1 0.2 1.8
 4 -2 -1 -0.1 2
 4 -2 -1 -3.7 1.9
 4 -2 -1 -0.3 2.6
 4 -2 -1 0.8 1
 4 -2 -1 -2 1.9
 4 -2 -1 1.8 2
 4 -2 -1 -1.8 1.5
 4 -2 -1 -2.3 3
 4 -2 -1 -1.7 2.1
 4 -2 -1 0.5 1.6
 4 -2 -1 1.3 2.1
 4 -2 -1 1.8 1.7
 4 -2 -1 1.8 1.8
 -3 2 1 125.59 9.2
 -3 2 1 138.39 9.4
 -3 2 1 133.99 9.4
 -3 2 1 131.59 9.8
 -3 2 1 139.99 10
 -3 2 1 160.38 10.2
 -3 2 1 124.89 10.3
 -3 2 1 131.09 10.9
 -3 2 1 140.89 9.5
 3 -2 -1 128.29 9.5
 3 -2 -1 102.19 9.5
 3 -2 -1 124.99 10.5
 3 -2 -1 138.79 8.4
 3 -2 -1 160.38 12
 3 -2 -1 129.09 9.5
 3 -2 -1 125.79 10.2
 3 -2 -1 99.19 9.2
 3 -2 -1 123.19 10
 3 -2 -1 128.29 9.4
 3 -2 -1 120.49 9.8
 3 -2 -1 126.59 9.3
 3 -2 -1 137.69 10.1
 -2 2 1 1489.25 86.89
 -2 2 1 1472.45 86.49
 -2 2 1 1615.34 86.99
 -2 2 1 1505.05 85.79
 -2 2 1 1379.56 86.49
 -2 2 1 1492.25 86.59
 -2 2 1 1475.25 86.69
 -2 2 1 1413.46 87.09
 -2 2 1 1412.06 86.29
 -2 2 1 1548.35 87.89
 2 -2 -1 1521.25 86.89
 2 -2 -1 1362.16 87.09
 2 -2 -1 1458.65 86.79
 2 -2 -1 1328.87 86.69
 2 -2 -1 1501.75 86.49
 2 -2 -1 1415.66 86.89
 2 -2 -1 1450.75 85.79
 2 -2 -1 1389.06 86.69
 2 -2 -1 1431.46 86.59
 2 -2 -1 1414.46 86.59
 2 -2 -1 1476.65 86.49
 -1 2 1 1414.56 85.89
 -1 2 1 1606.64 86.19
 -1 2 1 1355.86 86.09
 -1 2 1 1406.66 85.59
 -1 2 1 1466.95 85.99
 -1 2 1 1402.26 85.79
 -1 2 1 1466.75 85.59
 -1 2 1 1468.65 85.99
 -1 2 1 1625.44 87.09
 -1 2 1 1479.45 86.09
 -1 2 1 1381.76 85.89
 1 -2 -1 1413.26 85.69
 1 -2 -1 1409.56 86.19
 1 -2 -1 1503.15 86.79
 1 -2 -1 1369.46 86.09
 1 -2 -1 1403.96 85.89
 1 -2 -1 1439.76 85.99
 1 -2 -1 1448.85 85.89
 1 -2 -1 1492.45 86.09
 1 -2 -1 1410.16 85.99
 0 2 1 2777.62 149.09
 0 2 1 2746.03 149.19
 0 2 1 2418.76 149.19
 0 2 1 2439.26 149.09
 0 2 1 2623.64 150.28
 0 2 1 2666.23 148.89
 0 2 1 2497.35 149.39
 0 2 1 2430.46 149.09
 0 2 1 2453.35 149.09
 0 2 1 2344.67 149.39
 0 -2 -1 2702.13 150.28
 0 -2 -1 2454.05 149.39
 0 -2 -1 2407.06 149.19
 0 -2 -1 2644.54 149.09
 0 -2 -1 2493.25 149.39
 0 -2 -1 2421.86 149.09
 0 -2 -1 2386.66 148.99
 0 -2 -1 2683.73 149.19
 0 -2 -1 2565.54 148.89
 1 2 1 350.06 20
 1 2 1 334.77 20.2
 1 2 1 331.47 20.8
 1 2 1 338.87 20.7
 1 2 1 281.77 21
 1 2 1 347.97 20.3
 1 2 1 335.97 20.6
 1 2 1 296.47 21.9
 1 2 1 338.97 20.2
 1 2 1 343.67 20.4
 -1 -2 -1 315.27 19.7
 -1 -2 -1 345.27 20.3
 -1 -2 -1 326.57 20.2
 -1 -2 -1 362.06 19.9
 -1 -2 -1 336.07 20.3
 -1 -2 -1 320.87 21.2
 -1 -2 -1 346.67 20.7
 -1 -2 -1 344.17 20.5
 -1 -2 -1 345.17 22.2
 -1 -2 -1 337.77 20
 2 2 1 1476.55 102.49
 2 2 1 1809.62 100.69
 2 2 1 1702.53 99.99
 2 2 1 1801.72 100.79
 2 2 1 1840.72 101.19
 -2 -2 -1 1560.94 100.79
 -2 -2 -1 1702.13 99.59
 -2 -2 -1 1764.42 100.09
 -2 -2 -1 1495.95 102.59
 -2 -2 -1 1829.22 99.79
 3 2 1 299.97 18.5
 3 2 1 287.17 19.5
 3 2 1 273.37 18.6
 3 2 1 306.07 19.7
 -3 -2 -1 280.57 18.1
 4 2 1 841.72 51.59
 4 2 1 800.82 51.19
 4 2 1 854.11 50.89
 4 2 1 821.32 50.59
 4 2 1 893.11 49.99
 4 2 1 833.12 50.89
 -4 -2 -1 828.92 49.99
 -4 -2 -1 731.53 50.49
 5 2 1 317.87 21.7
 5 2 1 318.77 21.6
 5 2 1 295.77 22.2
 5 2 1 329.87 21.4
 5 2 1 339.77 21
 5 2 1 316.27 21.9
 5 2 1 331.27 20.2
 5 2 1 324.97 21.6
 5 2 1 309.67 20.1
 -5 -2 -1 322.67 20.7
 -5 -2 -1 280.67 21.3
 -5 -2 -1 277.27 20.6
 -5 -2 -1 319.67 20.3
 6 2 1 186.58 13.2
 6 2 1 184.58 14.6
 6 2 1 201.78 15.2
 6 2 1 193.28 15.1
 6 2 1 183.68 14.3
 6 2 1 225.78 14.6
 6 2 1 185.78 12.8
 6 2 1 198.28 15.2
 6 2 1 172.48 15.4
 6 2 1 178.38 14.5
 -6 -2 -1 189.28 11.9
 -6 -2 -1 178.78 14.7
 -6 -2 -1 200.88 13.9
 -6 -2 -1 157.08 13.7
 -6 -2 -1 200.48 13.2
 -6 -2 -1 183.08 11.7
 -6 -2 -1 192.28 13.7
 7 2 1 125.69 12.4
 7 2 1 142.49 11.3
 7 2 1 122.19 8.9
 7 2 1 110.69 12.5
 7 2 1 115.69 11.4
 7 2 1 116.49 9.6
 7 2 1 107.99 11.1
 7 2 1 126.09 10.9
 7 2 1 125.29 11.9
 7 2 1 113.59 11
 -7 -2 -1 124.29 8.4
 -7 -2 -1 112.49 9.9
 -7 -2 -1 124.59 9.4
 -7 -2 -1 131.09 10.4
 -7 -2 -1 111.69 8
 -7 -2 -1 118.59 11.5
 -7 -2 -1 106.89 10.2
 8 2 1 68.09 10.1
 8 2 1 65.29 6.2
 8 2 1 78.89 7.6
 8 2 1 92.19 12.2
 8 2 1 80.89 12.4
 8 2 1 82.09 10.7
 8 2 1 56.09 9.7
 8 2 1 81.19 10.6
 -8 -2 -1 73.89 9.3
 -8 -2 -1 66.59 9.8
 -8 -2 -1 72.79 5.7
 -8 -2 -1 78.29 8.8
 -8 -2 -1 75.29 6.2
 -8 -2 -1 82.59 7.2
 -8 -2 -1 85.89 9.7
 9 2 1 27.3 3.9
 9 2 1 28.7 7.3
 9 2 1 28.6 5.4
 9 2 1 28.5 6.9
 9 2 1 19.4 6.9
 9 2 1 27 7
 9 2 1 24.2 7.7
 9 2 1 17.5 5.9
 -9 -2 -1 28.1 4.5
 -9 -2 -1 39.6 8
 -9 -2 -1 30.4 4.3
 -9 -2 -1 33.1 4
 -9 -2 -1 20.1 5.3
 -9 -2 -1 31.5 5.6
 -9 -2 -1 25.3 5.8
 -9 -2 -1 28.7 7
 10 2 1 6.5 4.2
 10 2 1 7.8 3.4
 10 2 1 1 4.7
 10 2 1 -5.3 2.3
 10 2 1 4.1 4.3
 10 2 1 -2.1 4.6
 10 2 1 -1.2 4.3
 -10 -2 -1 -0.3 1.7
 -10 -2 -1 -2 2.5
 -10 -2 -1 3.4 3.6
 -10 -2 -1 3.2 4.1
 -10 -2 -1 4.5 4.4
 -10 -2 -1 -0.9 2.2
 -10 -2 -1 3.6 2.3
 -10 -2 -1 1.8 3.3
 11 2 1 4.3 4.5
 11 2 1 5.6 6.1
 11 2 1 8.3 4.2
 11 2 1 3.5 4.8
 11 2 1 8.1 6.4
 11 2 1 12 6.9
 -11 -2 -1 12.6 5.6
 -11 -2 -1 3 2.2
 -11 -2 -1 4 4
 -11 -2 -1 8.9 4
 -11 -2 -1 7.6 3.4
 -11 -2 -1 3.2 3.9
 -11 -2 -1 9.5 4.6
 -11 -2 -1 6.5 4.3
 -11 -2 -1 6 2.7
 12 2 1 9.2 7.2
 12 2 1 8 6.5
 12 2 1 5.8 5.8
 12 2 1 7.1 6
 12 2 1 1.1 3.6
 12 2 1 4.4 5.9
 -12 -2 -1 -1.6 3.8
 -12 -2 -1 0.3 4.1
 -12 -2 -1 5.6 3.6
 -12 -2 -1 -4 3.2
 -12 -2 -1 3.5 2.6
 13 2 1 71.19 12.8
 13 2 1 57.79 13.1
 13 2 1 87.99 14.3
 13 2 1 77.39 11.1
 13 2 1 60.19 13.8
 13 2 1 54.79 13.4
 -13 -2 -1 60.09 11.5
 -13 -2 -1 71.99 11.3
 -13 -2 -1 75.19 8.2
 14 2 1 32.5 9.8
 14 2 1 31.9 10.6
 14 2 1 24.5 10.3
 14 2 1 48.6 14
 14 2 1 44 10.7
 -14 -2 -1 41.2 6.1
 -14 -2 -1 43.6 10.1
 -14 -2 -1 37.4 9.5
 -13 3 2 49.9 8.8
 -13 3 2 53.99 11.5
 -13 3 2 64.09 9.2
 -13 3 2 80.59 13.7
 13 -3 -2 42.9 10.1
 13 -3 -2 50.89 13.9
 13 -3 -2 39.2 12.6
 13 -3 -2 5.5 9.7
 -12 3 2 11.2 6.3
 -12 3 2 14.3 7
 -12 3 2 6.8 4.2
 -12 3 2 18.7 5.3
 12 -3 -2 17.9 9.6
 12 -3 -2 16.2 9.3
 12 -3 -2 28.5 8.4
 12 -3 -2 10.1 8.5
 -11 3 2 49.9 9.8
 -11 3 2 40.6 9.3
 -11 3 2 10.4 4.9
 -11 3 2 35.3 6.7
 -11 3 2 30.3 6.3
 11 -3 -2 24.6 9
 11 -3 -2 29 8.4
 11 -3 -2 30.1 9.5
 11 -3 -2 30.6 11.4
 -10 3 2 41.3 7.4
 -10 3 2 38.9 9
 -10 3 2 54.99 8.3
 -10 3 2 45.5 10.9
 -10 3 2 37.8 8.8
 -10 3 2 48.3 7.9
 10 -3 -2 39 8.5
 10 -3 -2 62.09 12.6
 10 -3 -2 63.29 12.5
 10 -3 -2 64.59 14.2
 -9 3 2 14.2 5.2
 -9 3 2 7.5 3.8
 -9 3 2 19.3 4.9
 -9 3 2 8.7 5.3
 -9 3 2 10.6 4.6
 -9 3 2 4.9 5.4
 9 -3 -2 11.4 3.9
 9 -3 -2 17.5 7.2
 9 -3 -2 13.1 7.6
 9 -3 -2 21.1 6.4
 9 -3 -2 2.6 6.1
 -8 3 2 13 5.5
 -8 3 2 13.2 4.8
 -8 3 2 6 3.7
 -8 3 2 15.2 6.2
 -8 3 2 15.8 4.8
 -8 3 2 11.8 4.5
 -8 3 2 13.6 4.3
 -8 3 2 13.3 4.1
 8 -3 -2 16.7 6.7
 8 -3 -2 16.8 5.8
 8 -3 -2 19.4 7.2
 8 -3 -2 5.2 5.7
 8 -3 -2 6.8 3.5
 8 -3 -2 24.2 8.7
 8 -3 -2 8.8 3.8
 -7 3 2 24.2 4.9
 -7 3 2 26.9 6.1
 -7 3 2 23.4 5.4
 -7 3 2 29.5 5.3
 -7 3 2 28 6.5
 -7 3 2 19 6.2
 -7 3 2 24.6 4.8
 -7 3 2 15.4 4.3
 7 -3 -2 32.1 8.1
 7 -3 -2 26.2 5.8
 7 -3 -2 29.4 8.2
 7 -3 -2 28.4 6.2
 7 -3 -2 18.4 6.6
 7 -3 -2 25.6 4.6
 7 -3 -2 16.9 4.2
 7 -3 -2 19.2 6.6
 7 -3 -2 20.2 3
 -6 3 2 -1.1 2.4
 -6 3 2 0.4 3.1
 -6 3 2 -1.9 2.5
 -6 3 2 -1.5 1.6
 -6 3 2 0.2 2.7
 -6 3 2 0.2 2.6
 -6 3 2 3 3.3
 -6 3 2 -2.4 1.9
 6 -3 -2 -1.2 3.7
 6 -3 -2 1.7 3.1
 6 -3 -2 -1.4 3.1
 6 -3 -2 -3.2 4.3
 6 -3 -2 0.1 1.9
 6 -3 -2 -0.1 1.3
 6 -3 -2 -5 2.8
 6 -3 -2 0.2 2.6
 6 -3 -2 -0.9 2.7
 6 -3 -2 -2 1.6
 -5 3 2 5.7 2.7
 -5 3 2 9.6 3.9
 -5 3 2 6 2.8
 -5 3 2 5.3 3.1
 -5 3 2 8.8 3.3
 -5 3 2 6 2.5
 -5 3 2 9.1 4.3
 -5 3 2 11.5 3.2
 -5 3 2 10 3.6
 5 -3 -2 2.2 2.9
 5 -3 -2 7.8 3.1
 5 -3 -2 4.5 4.6
 5 -3 -2 4.3 3.2
 5 -3 -2 5.8 1.7
 5 -3 -2 6.1 2.8
 5 -3 -2 9.7 4.1
 5 -3 -2 5.3 2.6
 5 -3 -2 8.3 4
 -4 3 2 114.79 9
 -4 3 2 120.29 9.4
 -4 3 2 104.39 9.9
 -4 3 2 124.09 11.1
 -4 3 2 114.69 9
 -4 3 2 96.29 9.1
 -4 3 2 121.09 8.9
 -4 3 2 113.89 9
 -4 3 2 110.29 9.5
 4 -3 -2 96.89 8.6
 4 -3 -2 94.79 10.1
 4 -3 -2 103.79 8.9
 4 -3 -2 103.49 7.6
 4 -3 -2 107.09 9.5
 4 -3 -2 91.89 9
 4 -3 -2 89.19 9
 4 -3 -2 118.69 11.8
 4 -3 -2 99.19 9.5
 4 -3 -2 101.79 8.8
 -3 3 2 188.88 11.6
 -3 3 2 209.98 13.2
 -3 3 2 158.38 12.6
 -3 3 2 206.88 14.6
 -3 3 2 183.98 13.6
 -3 3 2 173.78 13
 -3 3 2 181.28 12.9
 -3 3 2 152.98 12.5
 -3 3 2 185.78 12.8
 -3 3 2 172.48 12.4
 -3 3 2 186.78 13.3
 3 -3 -2 185.08 15.2
 3 -3 -2 168.78 12.8
 3 -3 -2 174.08 12.6
 3 -3 -2 156.98 12.8
 3 -3 -2 165.98 13
 3 -3 -2 156.58 13.5
 3 -3 -2 191.98 13.3
 3 -3 -2 186.58 13.4
 3 -3 -2 177.28 12.7
 3 -3 -2 182.48 11.8
 3 -3 -2 163.08 12.9
 3 -3 -2 172.78 12.8
 -2 3 2 30.8 4.6
 -2 3 2 23.1 3.6
 -2 3 2 26.3 3.7
 -2 3 2 26.5 3.7
 -2 3 2 34 3.7
 -2 3 2 20.7 3.4
 -2 3 2 28.4 4.1
 -2 3 2 19 3.8
 -2 3 2 22.1 3.8
 -2 3 2 30.3 5.1
 -2 3 2 26.6 4.2
 2 -3 -2 32.4 4.1
 2 -3 -2 25.8 4
 2 -3 -2 25.3 3.9
 2 -3 -2 27.8 4.9
 2 -3 -2 27.1 4.2
 2 -3 -2 19.1 3.9
 2 -3 -2 28.6 3.3
 2 -3 -2 24.9 4.2
 2 -3 -2 27.5 4.1
 2 -3 -2 37 4.9
 2 -3 -2 17.5 3.3
 2 -3 -2 19.7 3.6
 -1 3 2 162.28 11
 -1 3 2 158.08 11
 -1 3 2 176.28 12.5
 -1 3 2 164.48 11
 -1 3 2 158.38 11
 -1 3 2 143.29 10.8
 -1 3 2 157.58 10.9
 -1 3 2 155.38 10.6
 -1 3 2 158.88 11.3
 -1 3 2 133.39 10.3
 -1 3 2 158.48 10.8
 1 -3 -2 150.38 10.9
 1 -3 -2 167.78 12.2
 1 -3 -2 149.59 11.1
 1 -3 -2 141.69 10.9
 1 -3 -2 147.39 10.7
 1 -3 -2 147.19 11
 1 -3 -2 145.39 10.8
 1 -3 -2 156.38 11
 1 -3 -2 156.48 11.4
 1 -3 -2 151.18 10.9
 1 -3 -2 149.79 10.6
 0 3 2 3022.5 185.78
 0 3 2 3008.9 187.08
 0 3 2 2939.51 185.88
 0 3 2 3122.69 185.48
 0 3 2 3454.45 185.68
 0 3 2 3072.39 185.48
 0 3 2 3088.99 185.28
 0 3 2 3359.36 185.28
 0 3 2 3299.57 184.98
 0 3 2 3208.18 185.58
 0 3 2 3186.08 185.78
 0 -3 -2 2792.32 185.18
 0 -3 -2 3095.79 185.88
 0 -3 -2 3326.77 185.58
 0 -3 -2 3153.48 185.58
 0 -3 -2 3168.78 185.68
 0 -3 -2 3387.66 187.28
 0 -3 -2 2988.2 185.78
 0 -3 -2 3019.9 185.58
 0 -3 -2 3242.48 185.08
 0 -3 -2 3146.39 185.38
 1 3 2 1040.7 59.49
 1 3 2 1023.7 60.59
 1 3 2 1017.4 60.09
 1 3 2 998.3 60.79
 1 3 2 879.11 62.29
 1 3 2 1046.5 59.59
 1 3 2 933.11 60.19
 1 3 2 1048.1 59.09
 1 3 2 1004.7 60.19
 -1 -3 -2 975.4 60.19
 -1 -3 -2 984.1 60.49
 -1 -3 -2 956.3 60.09
 -1 -3 -2 1025.2 59.49
 -1 -3 -2 1096.89 59.79
 -1 -3 -2 970.4 62.59
 -1 -3 -2 1063.59 60.59
 -1 -3 -2 991.6 60.19
 -1 -3 -2 1101.29 59.59
 -1 -3 -2 940.21 61.09
 2 3 2 1792.82 103.69
 2 3 2 1737.53 104.59
 2 3 2 1519.05 106.89
 2 3 2 1627.94 104.59
 2 3 2 1864.71 104.39
 2 3 2 1771.62 103.49
 2 3 2 2027.1 105.29
 2 3 2 1768.02 103.39
 2 3 2 1854.61 103.49
 2 3 2 1823.02 103.79
 -2 -3 -2 1541.65 105.19
 -2 -3 -2 1809.02 103.39
 -2 -3 -2 1779.22 103.69
 -2 -3 -2 1737.13 103.59
 -2 -3 -2 1663.63 107.19
 -2 -3 -2 1654.03 104.59
 -2 -3 -2 1803.02 103.19
 -2 -3 -2 1757.52 103.89
 -2 -3 -2 1809.72 103.69
 3 3 2 37.8 4.7
 3 3 2 32 4.4
 3 3 2 26.3 2.1
 3 3 2 29.8 3.4
 3 3 2 28.8 4.2
 3 3 2 28.7 2.3
 3 3 2 32.1 4.3
 3 3 2 31.1 4.9
 3 3 2 33.5 5.2
 -3 -3 -2 20.4 5.6
 -3 -3 -2 32.1 3.3
 -3 -3 -2 30 3.3
 -3 -3 -2 26.1 4.5
 -3 -3 -2 28.4 3.4
 -3 -3 -2 34.2 3.4
 -3 -3 -2 28.9 2.8
 -3 -3 -2 34 3.4
 4 3 2 348.27 22.9
 4 3 2 352.66 21.8
 4 3 2 367.46 22.3
 4 3 2 340.07 23
 4 3 2 348.37 21.9
 4 3 2 346.37 21.2
 4 3 2 326.87 21.9
 -4 -3 -2 285.77 25
 -4 -3 -2 336.07 21.1
 -4 -3 -2 335.97 21.3
 -4 -3 -2 303.57 21.4
 -4 -3 -2 324.47 20
 -4 -3 -2 296.57 22.4
 -4 -3 -2 332.57 20.1
 5 3 2 64.59 8.3
 5 3 2 62.69 6.6
 5 3 2 76.59 6.7
 5 3 2 73.09 7.2
 5 3 2 78.89 7.3
 5 3 2 80.79 9.7
 5 3 2 80.69 9.5
 -5 -3 -2 64.89 7
 -5 -3 -2 75.09 6.8
 -5 -3 -2 74.29 6.4
 -5 -3 -2 66.19 4.7
 -5 -3 -2 53.09 10.1
 6 3 2 496.85 34
 6 3 2 511.55 31.5
 6 3 2 520.75 32.5
 6 3 2 539.55 31.8
 6 3 2 504.65 32.4
 6 3 2 517.25 30.6
 6 3 2 487.05 32.8
 6 3 2 486.65 33.5
 6 3 2 505.75 33
 6 3 2 499.45 32.6
 -6 -3 -2 489.05 29.5
 -6 -3 -2 476.95 29.7
 -6 -3 -2 493.75 31.6
 -6 -3 -2 433.66 31.4
 -6 -3 -2 483.05 32.1
 -6 -3 -2 472.45 32.4
 7 3 2 65.49 6.7
 7 3 2 60.89 9.5
 7 3 2 72.69 6.4
 7 3 2 87.79 10.5
 7 3 2 100.29 10.9
 7 3 2 72.39 8.9
 7 3 2 75.79 7.9
 7 3 2 82.69 11.7
 7 3 2 72.99 10.2
 7 3 2 68.19 9.2
 -7 -3 -2 72.69 5.2
 -7 -3 -2 62.69 7.6
 -7 -3 -2 57.59 7.7
 -7 -3 -2 71.89 5
 -7 -3 -2 65.69 8.8
 -7 -3 -2 72.29 7.9
 -7 -3 -2 69.79 6.9
 8 3 2 89.39 10.4
 8 3 2 93.59 10.8
 8 3 2 78.99 11.2
 8 3 2 95.69 13.5
 8 3 2 84.39 10.7
 8 3 2 104.19 12.3
 8 3 2 88.29 7.8
 8 3 2 91.99 7.9
 8 3 2 91.59 12
 8 3 2 98.69 9.7
 -8 -3 -2 98.49 11.5
 -8 -3 -2 71.89 7.8
 -8 -3 -2 93.19 10.1
 -8 -3 -2 80.79 8.4
 -8 -3 -2 89.69 10.3
 -8 -3 -2 80.29 6.3
 -8 -3 -2 84.69 6.1
 -8 -3 -2 74.69 10.3
 9 3 2 80.99 10.6
 9 3 2 76.19 12.2
 9 3 2 78.09 8.2
 9 3 2 76.69 10.6
 9 3 2 72.19 11.1
 9 3 2 110.19 15
 9 3 2 82.69 8.9
 9 3 2 93.69 12.6
 9 3 2 60.79 10.3
 -9 -3 -2 109.19 12.6
 -9 -3 -2 78.49 6.1
 -9 -3 -2 77.09 6.5
 -9 -3 -2 66.69 9.4
 -9 -3 -2 86.99 9.6
 -9 -3 -2 77.89 8.7
 -9 -3 -2 79.49 9.8
 -9 -3 -2 85.89 11.4
 10 3 2 37.6 8.4
 10 3 2 35.8 6.1
 10 3 2 38.6 7.7
 10 3 2 52.49 9.9
 10 3 2 24.7 8.6
 10 3 2 46.5 9.3
 10 3 2 33.6 8.6
 10 3 2 33.1 5.2
 -10 -3 -2 36.4 6.3
 -10 -3 -2 32.8 4.2
 -10 -3 -2 41.7 5.9
 -10 -3 -2 30.5 7.1
 -10 -3 -2 35.7 4.7
 -10 -3 -2 34.3 7.6
 -10 -3 -2 39.9 7.5
 -10 -3 -2 36.5 7.2
 11 3 2 29.1 7.9
 11 3 2 33.5 9.9
 11 3 2 22.9 8.5
 11 3 2 28.5 8.1
 11 3 2 35.9 9.1
 11 3 2 24.5 8.2
 -11 -3 -2 24.1 7.4
 -11 -3 -2 36 4.8
 -11 -3 -2 39 7.5
 -11 -3 -2 36.9 4.4
 -11 -3 -2 26.3 6.2
 -11 -3 -2 32.2 5.5
 -11 -3 -2 30.8 6.4
 -11 -3 -2 19.9 6.4
 12 3 2 77.89 12.6
 12 3 2 92.09 13.9
 12 3 2 80.29 13.9
 12 3 2 70.49 13.4
 12 3 2 83.49 15.1
 12 3 2 71.59 14.8
 -12 -3 -2 68.59 6.8
 -12 -3 -2 71.39 11.9
 -12 -3 -2 66.79 10.5
 -12 -3 -2 80.79 10.4
 -12 -3 -2 75.49 7.5
 -12 -3 -2 100.49 10.5
 -12 -3 -2 72.19 11.8
 13 3 2 114.89 16.6
 13 3 2 167.78 19.4
 13 3 2 137.89 19.5
 13 3 2 139.59 19.7
 13 3 2 123.19 19.5
 -13 -3 -2 122.19 10.2
 -13 -3 -2 155.98 19.1
 -13 -3 -2 115.79 14.9
 14 3 2 34.4 9.9
 14 3 2 35.9 11.9
 14 3 2 25.4 8.8
 14 3 2 25.1 9.9
 14 3 2 23.7 9.9
 -14 -3 -2 30.8 8.3
 -14 -3 -2 26.4 4.8
 -14 -3 -2 14.8 8
 -12 4 3 6.2 4
 -12 4 3 12.5 7.1
 -12 4 3 4.3 5
 -12 4 3 8 4.4
 12 -4 -3 8.3 6.8
 12 -4 -3 1.9 8.4
 12 -4 -3 10.4 8.8
 12 -4 -3 16.9 8.8
 -11 4 3 -0.4 4.1
 -11 4 3 3.2 4.3
 -11 4 3 7.8 5.1
 -11 4 3 0.6 3.7
 -11 4 3 5.2 4.2
 11 -4 -3 1.1 7.3
 11 -4 -3 8.1 7.5
 11 -4 -3 12.8 8.2
 11 -4 -3 17.6 6.6
 -10 4 3 5.6 5.4
 -10 4 3 4.1 8.5
 -10 4 3 -3.4 3.6
 -10 4 3 2.5 3.6
 -10 4 3 7.3 4.2
 -10 4 3 -1.7 3.9
 10 -4 -3 -6.8 3.4
 10 -4 -3 -2.1 6
 10 -4 -3 1.9 6.4
 10 -4 -3 19.2 7.6
 -9 4 3 1.5 5.8
 -9 4 3 4.5 3.9
 -9 4 3 3.4 3.9
 -9 4 3 12.8 4.3
 -9 4 3 6 4.8
 9 -4 -3 4.5 5.6
 9 -4 -3 2.6 6
 9 -4 -3 1.8 7.6
 9 -4 -3 5.7 4
 9 -4 -3 1.8 4.6
 -8 4 3 36.2 9.3
 -8 4 3 44.1 8.8
 -8 4 3 29.1 6.5
 -8 4 3 27.9 6.6
 -8 4 3 25.4 5.7
 -8 4 3 42.2 7.2
 8 -4 -3 41 8.3
 8 -4 -3 58.59 11.3
 8 -4 -3 27.2 6
 8 -4 -3 32.8 4
 8 -4 -3 33.6 10.5
 8 -4 -3 39.7 9.4
 -7 4 3 25 5.6
 -7 4 3 35.9 6.2
 -7 4 3 22.3 5.6
 -7 4 3 34.2 6.2
 -7 4 3 39.7 9
 -7 4 3 23.5 5.3
 -7 4 3 26.4 6.2
 -7 4 3 24.2 6.7
 7 -4 -3 39.5 6.4
 7 -4 -3 32.4 7.9
 7 -4 -3 29 4
 7 -4 -3 40.8 7.9
 7 -4 -3 27.5 7.2
 7 -4 -3 44.3 8.8
 7 -4 -3 27.8 9.2
 7 -4 -3 25.6 5.6
 -6 4 3 49.3 7.7
 -6 4 3 74.19 9.4
 -6 4 3 49.2 7.3
 -6 4 3 52.09 9
 -6 4 3 50.09 7.1
 -6 4 3 60.79 7.5
 -6 4 3 52.29 7.7
 -6 4 3 65.69 10.6
 6 -4 -3 51.89 8.3
 6 -4 -3 55.09 9.3
 6 -4 -3 49.9 10.7
 6 -4 -3 63.79 8.3
 6 -4 -3 60.59 8.2
 6 -4 -3 56.29 5.3
 6 -4 -3 42 8.6
 -5 4 3 27.2 6.1
 -5 4 3 31.1 5.6
 -5 4 3 29.8 5.4
 -5 4 3 29.9 5.1
 -5 4 3 30.6 5.7
 -5 4 3 30.2 7
 -5 4 3 33.7 6.1
 -5 4 3 15.4 4.5
 -5 4 3 32.7 5.4
 5 -4 -3 35.3 8.6
 5 -4 -3 20.8 4.6
 5 -4 -3 16.6 4.9
 5 -4 -3 29 6.6
 5 -4 -3 25.8 3.8
 5 -4 -3 28.5 6.5
 -4 4 3 78.69 8.1
 -4 4 3 87.79 7.9
 -4 4 3 96.89 8.5
 -4 4 3 87.89 8.1
 -4 4 3 93.29 10.1
 -4 4 3 78.59 6.4
 -4 4 3 88.19 9.2
 -4 4 3 93.09 8.4
 -4 4 3 82.29 8.6
 -4 4 3 84.69 8.1
 4 -4 -3 79.89 8.4
 4 -4 -3 86.19 8.7
 4 -4 -3 102.49 12.7
 4 -4 -3 77.59 9.9
 4 -4 -3 68.49 8.1
 4 -4 -3 69.79 8.5
 4 -4 -3 78.19 6.9
 4 -4 -3 86.99 8.7
 4 -4 -3 94.39 8.3
 -3 4 3 460.35 29.9
 -3 4 3 437.86 29
 -3 4 3 496.35 29.5
 -3 4 3 455.55 29.9
 -3 4 3 495.95 29.4
 -3 4 3 434.86 28.7
 -3 4 3 448.56 29.2
 -3 4 3 530.55 31.4
 -3 4 3 493.65 31.1
 -3 4 3 453.75 29.3
 -3 4 3 439.56 28
 3 -4 -3 409.86 29.9
 3 -4 -3 455.55 29.1
 3 -4 -3 398.06 31
 3 -4 -3 419.26 29.2
 3 -4 -3 429.86 29
 3 -4 -3 459.65 29.7
 3 -4 -3 392.66 29
 3 -4 -3 444.46 29.1
 3 -4 -3 417.16 30.4
 3 -4 -3 505.65 30.1
 3 -4 -3 428.06 29.1
 3 -4 -3 434.96 28
 -2 4 3 4.8 2.2
 -2 4 3 8.1 3.3
 -2 4 3 7.3 2.7
 -2 4 3 6.8 2.6
 -2 4 3 9.4 2.9
 -2 4 3 7.3 2.6
 -2 4 3 4.7 2.2
 -2 4 3 12.7 4.1
 -2 4 3 5.1 2.7
 -2 4 3 6.1 2.5
 -2 4 3 6 2.5
 2 -4 -3 6.4 2.9
 2 -4 -3 10.8 3.1
 2 -4 -3 7.4 2.8
 2 -4 -3 7.4 2.7
 2 -4 -3 11.7 3.8
 2 -4 -3 7 2.5
 2 -4 -3 5.4 2.2
 2 -4 -3 11.7 3.5
 2 -4 -3 6.9 2.3
 2 -4 -3 6.3 2.8
 2 -4 -3 11.8 3.4
 -1 4 3 45.8 5.8
 -1 4 3 39 5.1
 -1 4 3 41.4 4.8
 -1 4 3 39.3 5
 -1 4 3 48.4 5.5
 -1 4 3 42.3 5.2
 -1 4 3 38.8 5
 -1 4 3 40.7 5.5
 -1 4 3 44.4 4.8
 -1 4 3 44.9 5
 -1 4 3 45.4 6.7
 1 -4 -3 45.3 5.4
 1 -4 -3 42.3 6.1
 1 -4 -3 41.3 5.9
 1 -4 -3 45.3 5.3
 1 -4 -3 38.5 5.1
 1 -4 -3 34.5 5
 1 -4 -3 34 4.6
 1 -4 -3 40.4 5.9
 1 -4 -3 43.5 4.9
 1 -4 -3 32.3 4.8
 1 -4 -3 32.3 4.4
 0 4 3 10.8 2.6
 0 4 3 8.1 3.5
 0 4 3 12.3 2.5
 0 4 3 9.9 2.9
 0 4 3 10.6 2.5
 0 4 3 11.8 2.8
 0 4 3 9.3 2.9
 0 4 3 15.8 2.4
 0 4 3 12.4 2.8
 0 4 3 11 2.9
 0 4 3 12.6 3
 0 4 3 9.2 1.8
 0 4 3 9.1 3
 0 -4 -3 9.2 2.8
 0 -4 -3 14.8 2.5
 0 -4 -3 11.9 2.8
 0 -4 -3 11.3 3.7
 0 -4 -3 6.4 2.8
 0 -4 -3 9.5 2.8
 0 -4 -3 11.4 2.7
 0 -4 -3 12.9 3.5
 0 -4 -3 14.2 2.9
 0 -4 -3 13.3 3
 0 -4 -3 10.1 3
 1 4 3 104.39 10.5
 1 4 3 142.39 10
 1 4 3 126.89 10.5
 1 4 3 133.39 10.4
 1 4 3 140.69 9.3
 1 4 3 134.69 10
 1 4 3 145.09 8.5
 1 4 3 141.49 9
 1 4 3 114.29 12.1
 1 4 3 148.99 10.3
 1 4 3 138.39 8.9
 1 4 3 124.89 10.1
 -1 -4 -3 141.29 9.8
 -1 -4 -3 132.09 10.2
 -1 -4 -3 142.49 9.1
 -1 -4 -3 129.39 11
 -1 -4 -3 113.99 10.1
 -1 -4 -3 146.29 9.5
 -1 -4 -3 132.79 10.1
 -1 -4 -3 131.19 10
 -1 -4 -3 155.38 10.5
 -1 -4 -3 142.69 9
 -1 -4 -3 127.09 12.4
 2 4 3 -1 1.5
 2 4 3 3.4 2.3
 2 4 3 0.1 0.8
 2 4 3 -0.7 1.6
 2 4 3 0.4 1.3
 2 4 3 3.8 1.7
 2 4 3 0.3 1.4
 2 4 3 -0.1 1
 2 4 3 1.5 1.4
 2 4 3 0.3 2.3
 2 4 3 -1.2 1.6
 2 4 3 0.9 3.1
 2 4 3 -0.2 2.1
 -2 -4 -3 -1.3 1.4
 -2 -4 -3 2 1.4
 -2 -4 -3 -2.4 1.5
 -2 -4 -3 -2 1
 -2 -4 -3 -0.2 1.6
 -2 -4 -3 -1.2 2.3
 -2 -4 -3 0.3 1.2
 -2 -4 -3 -1 1.8
 -2 -4 -3 -3.8 1.7
 -2 -4 -3 0 1.9
 -2 -4 -3 1 0.9
 3 4 3 648.24 39.4
 3 4 3 539.45 38.7
 3 4 3 610.04 37.3
 3 4 3 652.53 37.3
 3 4 3 631.64 38.4
 3 4 3 649.34 37.4
 3 4 3 613.44 37.5
 3 4 3 637.24 39
 3 4 3 623.14 36.9
 3 4 3 655.03 38.5
 3 4 3 674.53 39.7
 -3 -4 -3 568.34 42.4
 -3 -4 -3 602.24 37.5
 -3 -4 -3 622.44 37.3
 -3 -4 -3 626.04 37
 -3 -4 -3 597.84 37.5
 -3 -4 -3 583.74 38.9
 -3 -4 -3 611.24 37.8
 -3 -4 -3 644.94 37.7
 -3 -4 -3 508.45 39.5
 4 4 3 104.19 8.6
 4 4 3 99.79 6.5
 4 4 3 113.39 9
 4 4 3 99.19 6.6
 4 4 3 107.29 9.8
 4 4 3 102.49 9
 4 4 3 111.39 10.1
 4 4 3 104.49 7.9
 4 4 3 97.59 8.8
 -4 -4 -3 98.69 7.5
 -4 -4 -3 94.29 9.5
 -4 -4 -3 90.39 12.4
 -4 -4 -3 110.09 7.9
 -4 -4 -3 111.49 8
 -4 -4 -3 109.19 7.9
 -4 -4 -3 104.09 7.6
 5 4 3 277.17 17.9
 5 4 3 276.67 18.6
 5 4 3 266.27 18.9
 5 4 3 281.97 18.8
 5 4 3 293.97 19.2
 5 4 3 261.07 19.8
 5 4 3 280.87 20.3
 -5 -4 -3 221.88 19.3
 -5 -4 -3 260.27 17.8
 -5 -4 -3 216.28 22.4
 -5 -4 -3 269.57 16.8
 -5 -4 -3 281.27 17.1
 -5 -4 -3 256.67 18.1
 -5 -4 -3 275.77 17.8
 6 4 3 158.58 12.7
 6 4 3 144.09 11.6
 6 4 3 153.68 12.6
 6 4 3 126.09 13.1
 6 4 3 160.58 11.1
 6 4 3 171.28 13.9
 6 4 3 153.38 11.9
 6 4 3 136.99 11.7
 -6 -4 -3 102.99 15.1
 -6 -4 -3 151.88 9.9
 -6 -4 -3 139.89 11.1
 -6 -4 -3 137.49 11.5
 -6 -4 -3 119.29 12.8
 -6 -4 -3 163.68 11.7
 7 4 3 66.09 8.4
 7 4 3 63.69 10
 7 4 3 61.39 8.9
 7 4 3 65.59 8.5
 7 4 3 78.69 10.7
 7 4 3 61.59 8.8
 7 4 3 68.09 7.8
 7 4 3 58.29 6.7
 7 4 3 69.99 8.2
 -7 -4 -3 37 10.1
 -7 -4 -3 64.59 5.1
 -7 -4 -3 56.89 7.1
 -7 -4 -3 58.59 7.9
 -7 -4 -3 67.89 8.5
 -7 -4 -3 56.59 9.1
 -7 -4 -3 57.39 4.9
 -7 -4 -3 64.79 7.6
 8 4 3 228.08 16.3
 8 4 3 217.78 17.2
 8 4 3 223.18 17
 8 4 3 210.28 17.8
 8 4 3 225.98 18
 8 4 3 211.28 18.6
 8 4 3 222.28 19.5
 8 4 3 217.68 17.2
 8 4 3 227.78 16.6
 -8 -4 -3 243.28 16.7
 -8 -4 -3 196.78 16.9
 -8 -4 -3 179.98 21.8
 -8 -4 -3 218.48 14
 -8 -4 -3 236.08 16.3
 -8 -4 -3 224.18 17
 -8 -4 -3 204.98 16.1
 -8 -4 -3 206.48 13.9
 9 4 3 278.17 21.4
 9 4 3 295.07 23
 9 4 3 294.07 21.2
 9 4 3 282.27 23.5
 9 4 3 296.37 24.4
 9 4 3 289.57 21.7
 9 4 3 308.77 22.2
 9 4 3 281.67 20
 9 4 3 304.57 22.8
 -9 -4 -3 267.47 20.2
 -9 -4 -3 276.47 21.6
 -9 -4 -3 282.27 20
 -9 -4 -3 258.17 20.4
 -9 -4 -3 222.38 26.4
 -9 -4 -3 289.47 17.9
 -9 -4 -3 267.37 17.8
 -9 -4 -3 292.57 21.7
 -9 -4 -3 302.57 21
 10 4 3 987.5 65.29
 10 4 3 1020.2 65.79
 10 4 3 1011.8 64.59
 10 4 3 1001.6 67.19
 10 4 3 961 64.39
 10 4 3 1014.9 61.89
 10 4 3 1021.9 64.29
 10 4 3 1025.5 66.69
 -10 -4 -3 990 59.99
 -10 -4 -3 955.9 63.09
 -10 -4 -3 995.8 63.39
 -10 -4 -3 955.1 64.29
 -10 -4 -3 1011.8 62.29
 -10 -4 -3 1019.6 60.09
 -10 -4 -3 977.7 62.69
 -10 -4 -3 1034.1 64.49
 11 4 3 56.49 9.7
 11 4 3 40.7 10.4
 11 4 3 45 6.7
 11 4 3 60.29 10.8
 11 4 3 40.7 9.1
 11 4 3 29 7.5
 11 4 3 43.1 10.3
 11 4 3 59.09 11.3
 -11 -4 -3 43 7.7
 -11 -4 -3 46.6 5.1
 -11 -4 -3 46.4 5.3
 -11 -4 -3 39.8 7.6
 -11 -4 -3 28.4 11.1
 -11 -4 -3 37.6 8.2
 -11 -4 -3 54.79 8.3
 -11 -4 -3 55.79 7.4
 -11 -4 -3 49.1 9.4
 12 4 3 0.4 5.6
 12 4 3 -1.8 5
 12 4 3 4.5 6
 12 4 3 2.4 5.3
 12 4 3 2.6 5.5
 12 4 3 2.2 5.1
 -12 -4 -3 0.1 3.7
 -12 -4 -3 0.7 2
 -12 -4 -3 -3.1 3.5
 -12 -4 -3 -1 2.3
 -12 -4 -3 2.8 4.7
 -12 -4 -3 -3 4.9
 -12 -4 -3 -2.5 2.9
 13 4 3 14.4 7.2
 13 4 3 3.9 6.5
 13 4 3 10.6 6.3
 13 4 3 2.4 6
 13 4 3 1.4 4.9
 13 4 3 11.9 7.7
 -13 -4 -3 7.4 4.8
 -13 -4 -3 5.3 2.7
 -13 -4 -3 4.9 2.7
 -13 -4 -3 17.8 6.9
 14 4 3 -2.2 6
 14 4 3 -1.3 7
 14 4 3 1.1 5.7
 14 4 3 -1 6.8
 14 4 3 8.1 6.7
 -14 -4 -3 2.6 4.1
 -14 -4 -3 0.1 2.7
 -14 -4 -3 0.9 5.4
 -12 5 4 6.5 5
 -12 5 4 7.3 5.5
 -12 5 4 0.1 5.7
 -12 5 4 2.9 3.7
 12 -5 -4 3.5 6.6
 12 -5 -4 1.4 10.5
 12 -5 -4 -0.1 8.1
 -11 5 4 37.5 8
 -11 5 4 39.3 8.7
 -11 5 4 43.2 8.7
 -11 5 4 36.6 9.4
 -11 5 4 49.7 10.7
 11 -5 -4 38.3 9.3
 11 -5 -4 26.9 11.9
 11 -5 -4 23.8 11
 11 -5 -4 52.79 13.3
 -10 5 4 9 6.6
 -10 5 4 22 6.1
 -10 5 4 21.5 7.8
 -10 5 4 12.8 5.5
 -10 5 4 11.3 5.5
 10 -5 -4 25.6 8.3
 10 -5 -4 15.4 7.5
 10 -5 -4 14.3 7.3
 10 -5 -4 20.1 10.1
 -9 5 4 43.2 8
 -9 5 4 37.3 7.4
 -9 5 4 31.8 8.1
 -9 5 4 31.6 9.8
 -9 5 4 24.8 6.6
 9 -5 -4 46.9 10.8
 9 -5 -4 54.39 10.5
 9 -5 -4 26.1 9.3
 9 -5 -4 41.9 12
 -8 5 4 30.6 6.9
 -8 5 4 27.4 6.7
 -8 5 4 15.7 6.3
 -8 5 4 23 6.4
 -8 5 4 35.8 6.7
 -8 5 4 30.6 9
 8 -5 -4 17.3 8.4
 8 -5 -4 17.1 7.5
 8 -5 -4 24 6
 8 -5 -4 24.2 7.2
 8 -5 -4 29.1 8.7
 -7 5 4 78.59 12.2
 -7 5 4 77.29 10.9
 -7 5 4 93.39 10.9
 -7 5 4 95.89 10.5
 -7 5 4 93.29 11.3
 -7 5 4 70.29 11.6
 7 -5 -4 73.69 11.6
 7 -5 -4 55.89 12.4
 7 -5 -4 77.79 10.3
 7 -5 -4 85.29 11.8
 7 -5 -4 80.99 12
 7 -5 -4 70.49 7
 -6 5 4 27.5 7.6
 -6 5 4 28.3 7
 -6 5 4 26.2 5.7
 -6 5 4 27.8 6
 -6 5 4 42.1 7.2
 -6 5 4 22.9 6
 -6 5 4 47.3 7.5
 6 -5 -4 33 7.2
 6 -5 -4 28.5 4.4
 6 -5 -4 36.7 9.8
 6 -5 -4 30.4 7.9
 6 -5 -4 12.6 5.7
 6 -5 -4 40.9 7
 6 -5 -4 27.8 6.5
 -5 5 4 0.6 3
 -5 5 4 2.2 3.2
 -5 5 4 -1.8 2.6
 -5 5 4 -3.8 2
 -5 5 4 5.3 3.2
 -5 5 4 -1.5 2.7
 -5 5 4 0.3 1.7
 -5 5 4 0.3 4
 5 -5 -4 1.8 3.7
 5 -5 -4 0.3 3.3
 5 -5 -4 -0.8 2.6
 5 -5 -4 -3.5 4.8
 5 -5 -4 0.1 4
 5 -5 -4 -0.1 3.4
 5 -5 -4 -0.6 2.5
 5 -5 -4 -0.4 2.3
 -4 5 4 478.25 32.9
 -4 5 4 540.15 33.5
 -4 5 4 447.56 33.6
 -4 5 4 504.25 31.5
 -4 5 4 539.75 34.3
 -4 5 4 485.85 32.5
 -4 5 4 546.85 33.6
 -4 5 4 524.65 33.3
 -4 5 4 588.24 36.1
 4 -5 -4 503.75 33.4
 4 -5 -4 452.65 34.2
 4 -5 -4 486.15 32.9
 4 -5 -4 526.55 36.6
 4 -5 -4 489.25 30.5
 4 -5 -4 467.85 33.1
 4 -5 -4 513.85 31.8
 4 -5 -4 462.05 33.6
 4 -5 -4 472.65 33.5
 -3 5 4 335.77 22.4
 -3 5 4 332.37 23.1
 -3 5 4 311.17 22.5
 -3 5 4 334.37 22.8
 -3 5 4 333.17 22.7
 -3 5 4 331.77 22.7
 -3 5 4 374.76 25.3
 -3 5 4 327.17 22.1
 -3 5 4 340.27 23.5
 -3 5 4 318.97 21.6
 3 -5 -4 313.27 24
 3 -5 -4 342.97 22.7
 3 -5 -4 309.77 21.4
 3 -5 -4 322.57 22.6
 3 -5 -4 340.77 23.1
 3 -5 -4 317.17 25.1
 3 -5 -4 336.27 23.7
 3 -5 -4 310.07 22.9
 3 -5 -4 309.87 22.5
 3 -5 -4 320.07 23.3
 -2 5 4 101.89 8.7
 -2 5 4 100.89 8.5
 -2 5 4 102.39 9.3
 -2 5 4 116.09 9.6
 -2 5 4 104.29 9.4
 -2 5 4 108.39 9.4
 -2 5 4 101.09 9.4
 -2 5 4 86.89 9.4
 -2 5 4 115.79 11.6
 -2 5 4 114.99 9.2
 2 -5 -4 81.99 8.8
 2 -5 -4 96.29 9.5
 2 -5 -4 118.29 9.6
 2 -5 -4 113.29 10.9
 2 -5 -4 110.19 9.6
 2 -5 -4 87.29 8.6
 2 -5 -4 102.49 10.1
 2 -5 -4 100.09 9.3
 2 -5 -4 112.89 8.7
 2 -5 -4 104.99 9.6
 -1 5 4 239.48 16
 -1 5 4 237.28 18.9
 -1 5 4 220.18 16.8
 -1 5 4 251.77 16.2
 -1 5 4 229.38 16.4
 -1 5 4 234.48 17.1
 -1 5 4 247.78 15.7
 -1 5 4 235.68 16.5
 -1 5 4 221.78 16.5
 -1 5 4 248.58 16.7
 -1 5 4 227.08 16.5
 1 -5 -4 205.28 16.4
 1 -5 -4 198.48 15.6
 1 -5 -4 237.58 18.2
 1 -5 -4 227.28 16.2
 1 -5 -4 233.88 16.5
 1 -5 -4 255.07 16.8
 1 -5 -4 214.88 16.6
 1 -5 -4 221.08 16.4
 1 -5 -4 224.38 16.3
 1 -5 -4 207.98 16.2
 1 -5 -4 228.28 17.2
 0 5 4 4.2 1.6
 0 5 4 3.2 2.7
 0 5 4 3.3 3.5
 0 5 4 3.3 1.8
 0 5 4 3.3 2.3
 0 5 4 2.5 2.6
 0 5 4 5.1 2.3
 0 5 4 6.4 2.5
 0 5 4 5.2 2.6
 0 5 4 3.6 2.4
 0 5 4 3.7 2.3
 0 5 4 1.9 2.5
 0 5 4 1.1 1.9
 0 -5 -4 1.8 2.2
 0 -5 -4 2.7 2.5
 0 -5 -4 4.5 2.7
 0 -5 -4 2.3 2.2
 0 -5 -4 3.6 2.5
 0 -5 -4 6 2.4
 0 -5 -4 1.7 3
 0 -5 -4 4 2.8
 0 -5 -4 3.4 2.7
 0 -5 -4 1.8 2
 0 -5 -4 4.4 2
 1 5 4 15.5 3.8
 1 5 4 16.3 5.1
 1 5 4 16.3 2.8
 1 5 4 16.5 3.6
 1 5 4 19 4.1
 1 5 4 20.8 3.7
 1 5 4 19.4 3.9
 1 5 4 9.2 3.3
 1 5 4 20.2 2.8
 1 5 4 20.7 2.8
 1 5 4 14.4 3
 1 5 4 16.2 4.2
 1 5 4 21.1 2.3
 -1 -5 -4 21.7 4
 -1 -5 -4 15 3.5
 -1 -5 -4 18.9 4
 -1 -5 -4 22.3 3
 -1 -5 -4 15 3
 -1 -5 -4 17.5 3.8
 -1 -5 -4 25.3 4.7
 -1 -5 -4 24.2 3.5
 -1 -5 -4 18.3 3.4
 -1 -5 -4 17.4 4.3
 -1 -5 -4 17.1 5.4
 2 5 4 152.28 11.5
 2 5 4 158.18 12.1
 2 5 4 157.88 9.7
 2 5 4 123.59 11.8
 2 5 4 153.78 10.4
 2 5 4 159.58 11.4
 2 5 4 139.09 11
 2 5 4 145.19 11.3
 2 5 4 141.79 12.2
 2 5 4 124.39 14.7
 2 5 4 169.38 11.8
 2 5 4 145.59 10.9
 -2 -5 -4 160.78 10.3
 -2 -5 -4 143.29 11.5
 -2 -5 -4 164.78 10.5
 -2 -5 -4 147.99 11.3
 -2 -5 -4 146.89 11.9
 -2 -5 -4 159.28 9.7
 -2 -5 -4 128.89 10.7
 -2 -5 -4 156.98 12.2
 -2 -5 -4 152.18 13.4
 -2 -5 -4 154.88 15.5
 -2 -5 -4 173.78 10.1
 -2 -5 -4 148.59 11.4
 3 5 4 519.25 31.9
 3 5 4 495.85 30.5
 3 5 4 519.35 30.7
 3 5 4 511.15 32.7
 3 5 4 485.05 31.1
 3 5 4 515.05 30.9
 3 5 4 403.26 32.1
 3 5 4 520.35 31.8
 3 5 4 498.85 31.2
 3 5 4 526.95 33.2
 3 5 4 513.25 32.8
 3 5 4 505.75 30.1
 3 5 4 415.66 35.8
 -3 -5 -4 513.45 31.3
 -3 -5 -4 515.95 31.7
 -3 -5 -4 544.35 29.9
 -3 -5 -4 467.45 32.4
 -3 -5 -4 519.25 30.5
 -3 -5 -4 423.46 33.3
 -3 -5 -4 470.55 31.1
 -3 -5 -4 471.25 31.2
 -3 -5 -4 527.45 29.9
 -3 -5 -4 471.45 36.5
 4 5 4 1.6 1.9
 4 5 4 2.9 1.9
 4 5 4 8.1 3.2
 4 5 4 1.6 2.1
 4 5 4 4.7 2.6
 4 5 4 1.2 1.1
 4 5 4 1.6 2.3
 4 5 4 7.6 3.8
 4 5 4 2.2 3
 4 5 4 3.1 2.2
 4 5 4 2.7 1.7
 -4 -5 -4 1.4 2
 -4 -5 -4 2.8 1.8
 -4 -5 -4 3.7 4.1
 -4 -5 -4 3.1 2.7
 -4 -5 -4 -4.2 2.2
 -4 -5 -4 2.2 2.4
 -4 -5 -4 2.2 1.6
 -4 -5 -4 3.6 2.2
 5 5 4 -0.8 2.5
 5 5 4 0 2.2
 5 5 4 -0.7 2.4
 5 5 4 -1.2 2.4
 5 5 4 2.4 2
 5 5 4 3.2 4
 5 5 4 1 2.2
 -5 -5 -4 0.3 2.7
 -5 -5 -4 -2.5 1.7
 -5 -5 -4 -0.8 3.6
 -5 -5 -4 0 1.8
 -5 -5 -4 2 1.7
 -5 -5 -4 0.5 1.7
 -5 -5 -4 -0.1 2.1
 -5 -5 -4 2.3 2
 6 5 4 21.6 5
 6 5 4 17.4 5.7
 6 5 4 19.2 4.7
 6 5 4 26.3 4.2
 6 5 4 28.7 5.3
 6 5 4 23.8 6.4
 6 5 4 18.4 4.3
 6 5 4 28.4 5.5
 6 5 4 22.1 4.1
 -6 -5 -4 23.6 3.8
 -6 -5 -4 13.2 4.8
 -6 -5 -4 17.9 7.3
 -6 -5 -4 24.1 4.1
 -6 -5 -4 24.1 4
 -6 -5 -4 15.9 3.7
 -6 -5 -4 20.9 4.4
 7 5 4 233.28 17.8
 7 5 4 237.98 19.9
 7 5 4 241.88 18.6
 7 5 4 255.57 20.5
 7 5 4 240.38 18
 7 5 4 259.27 16.9
 7 5 4 262.57 18.1
 7 5 4 226.88 18.5
 7 5 4 249.48 16.8
 -7 -5 -4 263.47 17.3
 -7 -5 -4 177.48 22.4
 -7 -5 -4 229.78 15.8
 -7 -5 -4 248.78 17.4
 -7 -5 -4 245.88 16
 -7 -5 -4 225.28 17.4
 -7 -5 -4 234.78 19.9
 -7 -5 -4 208.18 16.4
 8 5 4 62.79 9.9
 8 5 4 86.29 9
 8 5 4 68.59 8.8
 8 5 4 63.69 7.2
 8 5 4 71.19 9.4
 8 5 4 51.99 10.2
 8 5 4 71.39 10.2
 8 5 4 63.49 10.5
 8 5 4 69.29 9.3
 -8 -5 -4 77.19 9.1
 -8 -5 -4 83.89 9.6
 -8 -5 -4 61.39 5.9
 -8 -5 -4 67.89 8.1
 -8 -5 -4 69.89 6.1
 -8 -5 -4 50.49 9.6
 -8 -5 -4 72.79 8.3
 -8 -5 -4 47 12.1
 9 5 4 6.8 4.5
 9 5 4 10.3 5.9
 9 5 4 8.8 4.2
 9 5 4 8.9 4.5
 9 5 4 3.7 3.7
 9 5 4 8.3 5
 9 5 4 3.3 4.1
 9 5 4 2.1 3.5
 9 5 4 9.7 4.5
 -9 -5 -4 5.2 2.6
 -9 -5 -4 7 3.4
 -9 -5 -4 1.8 5.5
 -9 -5 -4 6.8 3.9
 -9 -5 -4 6.1 3.4
 -9 -5 -4 7.2 4.8
 -9 -5 -4 7.6 4.3
 -9 -5 -4 7 2.2
 10 5 4 332.87 27.5
 10 5 4 322.07 24.8
 10 5 4 318.77 24.3
 10 5 4 340.17 26.3
 10 5 4 342.67 25.3
 10 5 4 374.56 28.8
 10 5 4 341.87 26.7
 10 5 4 303.37 23.4
 -10 -5 -4 353.86 24.6
 -10 -5 -4 315.27 27.8
 -10 -5 -4 296.07 23.5
 -10 -5 -4 358.96 25.1
 -10 -5 -4 329.27 21.1
 -10 -5 -4 352.16 21.5
 -10 -5 -4 273.47 31.3
 -10 -5 -4 359.76 23.9
 -10 -5 -4 332.77 25
 11 5 4 59.59 12.7
 11 5 4 63.99 11.1
 11 5 4 73.09 9.3
 11 5 4 75.59 11.2
 11 5 4 53.09 10.9
 11 5 4 81.69 14
 11 5 4 70.29 10.7
 11 5 4 86.19 11.9
 -11 -5 -4 52.39 9.4
 -11 -5 -4 64.09 8.7
 -11 -5 -4 56.99 8.8
 -11 -5 -4 67.69 9.2
 -11 -5 -4 49.4 10.9
 -11 -5 -4 68.99 10
 -11 -5 -4 58.49 5.7
 -11 -5 -4 62.09 6.1
 -11 -5 -4 49.2 8.8
 -11 -5 -4 47.1 14.4
 12 5 4 143.79 19.4
 12 5 4 158.58 15.3
 12 5 4 135.09 14.4
 12 5 4 135.29 18.9
 12 5 4 127.49 16.3
 12 5 4 106.59 16.4
 12 5 4 166.48 21.4
 -12 -5 -4 129.99 12.9
 -12 -5 -4 124.59 10.1
 -12 -5 -4 139.69 10.1
 -12 -5 -4 141.89 13.5
 -12 -5 -4 129.69 14.3
 -12 -5 -4 132.19 14.3
 -12 -5 -4 114.09 17.9
 13 5 4 22.6 7.8
 13 5 4 8.8 7.6
 13 5 4 32.7 10.1
 13 5 4 13.9 7.9
 13 5 4 19.6 8.5
 -13 -5 -4 24.2 4.1
 -13 -5 -4 22.3 4.1
 -13 -5 -4 20.8 8.5
 -13 -5 -4 16.7 6.1
 -13 -5 -4 22.8 7.4
 14 5 4 44 13.9
 14 5 4 46.8 11
 14 5 4 56.79 12.7
 14 5 4 35.5 10.6
 14 5 4 57.59 14.1
 -14 -5 -4 47.1 11.1
 -14 -5 -4 58.39 6.5
 -14 -5 -4 51.19 9.5
 -14 -5 -4 48.2 12.7
 -11 6 5 0.1 4.4
 -11 6 5 -7.4 4.5
 -11 6 5 -4.5 3
 -11 6 5 -1.3 4.1
 11 -6 -5 0.4 5.5
 11 -6 -5 0.2 8.2
 11 -6 -5 -1.8 9
 11 -6 -5 3.7 8
 -10 6 5 111.29 13.2
 -10 6 5 119.19 14.2
 -10 6 5 127.69 15.4
 -10 6 5 119.79 15.3
 -10 6 5 120.19 17
 10 -6 -5 79.69 18.4
 10 -6 -5 101.19 15.9
 10 -6 -5 119.09 18.1
 10 -6 -5 107.49 18.1
 -9 6 5 38.9 7.8
 -9 6 5 38.1 8.3
 -9 6 5 37.5 8
 -9 6 5 26.1 7.7
 9 -6 -5 15.7 8.5
 9 -6 -5 37.4 9.2
 9 -6 -5 16.1 8.8
 9 -6 -5 20.2 10.7
 -8 6 5 9.8 5.1
 -8 6 5 18.3 6.5
 -8 6 5 17.7 8.4
 -8 6 5 14.8 5.6
 -8 6 5 9.6 5.4
 8 -6 -5 15.2 8.8
 8 -6 -5 12.6 5.5
 8 -6 -5 20.7 7.2
 8 -6 -5 8.7 7.3
 8 -6 -5 19.7 7.5
 -7 6 5 7.2 4.9
 -7 6 5 5.9 4.2
 -7 6 5 4.2 4.2
 -7 6 5 4.7 4.1
 -7 6 5 0.9 3.7
 -7 6 5 0.1 5.7
 7 -6 -5 -1.2 3.7
 7 -6 -5 8.5 6.4
 7 -6 -5 1.8 2.6
 7 -6 -5 4.1 7.2
 7 -6 -5 4.8 4.4
 -6 6 5 62.09 11.4
 -6 6 5 74.89 9.3
 -6 6 5 68.99 10.2
 -6 6 5 61.79 9.3
 -6 6 5 68.09 10.8
 -6 6 5 77.59 10.1
 6 -6 -5 57.19 10.4
 6 -6 -5 61.49 7.4
 6 -6 -5 63.49 9.7
 6 -6 -5 58.09 9.5
 6 -6 -5 57.99 13
 6 -6 -5 81.79 11.5
 6 -6 -5 68.49 10.2
 6 -6 -5 55.69 9.9
 -5 6 5 118.49 12.5
 -5 6 5 126.69 11.7
 -5 6 5 116.99 11.5
 -5 6 5 120.89 14.3
 -5 6 5 97.29 12.5
 -5 6 5 116.49 11.1
 -5 6 5 119.19 11.5
 -5 6 5 97.09 9.1
 5 -6 -5 117.69 10.2
 5 -6 -5 126.49 12.6
 5 -6 -5 123.99 16.9
 5 -6 -5 99.29 13.7
 5 -6 -5 101.49 11.6
 5 -6 -5 110.79 11.4
 5 -6 -5 120.99 13.9
 5 -6 -5 144.79 13.2
 -4 6 5 172.28 13.9
 -4 6 5 183.38 14.5
 -4 6 5 178.68 13.8
 -4 6 5 150.58 14.4
 -4 6 5 146.79 12.5
 -4 6 5 158.78 14.7
 -4 6 5 182.38 14.5
 -4 6 5 171.58 16.8
 4 -6 -5 185.18 13.1
 4 -6 -5 148.29 14.4
 4 -6 -5 168.98 11.8
 4 -6 -5 172.68 17.3
 4 -6 -5 173.18 14.3
 4 -6 -5 144.09 15.4
 4 -6 -5 173.78 14.5
 4 -6 -5 147.39 15
 4 -6 -5 167.08 14.7
 4 -6 -5 173.48 14.4
 -3 6 5 440.86 27.9
 -3 6 5 415.86 28
 -3 6 5 427.36 28.8
 -3 6 5 438.96 31.6
 -3 6 5 435.66 29.1
 -3 6 5 398.46 29.3
 -3 6 5 421.56 28.9
 -3 6 5 412.16 28
 3 -6 -5 419.06 28.7
 3 -6 -5 465.25 28.8
 3 -6 -5 402.86 27.4
 3 -6 -5 410.46 30.3
 3 -6 -5 421.16 28.6
 3 -6 -5 424.46 29.6
 3 -6 -5 377.66 29.2
 3 -6 -5 396.06 31.2
 3 -6 -5 435.96 29.3
 -2 6 5 6.4 2.8
 -2 6 5 6.4 3.6
 -2 6 5 9 3.7
 -2 6 5 7.4 3.2
 -2 6 5 9.7 3.7
 -2 6 5 7.8 4.7
 -2 6 5 7.4 3
 -2 6 5 10.1 3.6
 -2 6 5 8.3 3.8
 2 -6 -5 11 3.9
 2 -6 -5 4.6 2.8
 2 -6 -5 7.6 4.4
 2 -6 -5 1.8 2.7
 2 -6 -5 8.1 3.6
 2 -6 -5 7.4 3.6
 2 -6 -5 2.2 3
 2 -6 -5 11 4.1
 2 -6 -5 10.9 4.7
 -1 6 5 76.69 7.4
 -1 6 5 61.09 8.3
 -1 6 5 80.09 6.2
 -1 6 5 67.79 8
 -1 6 5 77.99 8.9
 -1 6 5 63.99 7.8
 -1 6 5 58.39 9.6
 -1 6 5 76.69 6.7
 -1 6 5 80.69 7.2
 -1 6 5 73.09 7.2
 1 -6 -5 77.49 7.9
 1 -6 -5 60.59 8.2
 1 -6 -5 56.99 7.6
 1 -6 -5 74.79 9.7
 1 -6 -5 72.79 8.2
 1 -6 -5 59.59 7.8
 1 -6 -5 69.89 8.4
 1 -6 -5 77.89 9.8
 1 -6 -5 54.69 7
 0 6 5 93.19 7.4
 0 6 5 73.09 8.9
 0 6 5 88.19 11.4
 0 6 5 75.29 9.4
 0 6 5 72.99 9.1
 0 6 5 86.49 8.7
 0 6 5 93.79 8.4
 0 6 5 97.39 8
 0 6 5 98.69 7.3
 0 6 5 104.69 9
 0 -6 -5 86.89 10
 0 -6 -5 85.69 8.4
 0 -6 -5 98.09 9.1
 0 -6 -5 91.09 9.2
 0 -6 -5 92.59 10.8
 0 -6 -5 94.79 8.4
 0 -6 -5 104.89 10
 0 -6 -5 94.49 11.3
 0 -6 -5 99.69 9.5
 0 -6 -5 82.09 7.5
 1 6 5 264.77 21
 1 6 5 314.97 21.3
 1 6 5 311.77 19.6
 1 6 5 289.77 21.8
 1 6 5 291.87 20.8
 1 6 5 318.57 19
 1 6 5 314.97 20
 1 6 5 314.77 21.2
 1 6 5 248.68 24.3
 1 6 5 333.37 19.6
 -1 -6 -5 319.07 20.5
 -1 -6 -5 319.27 21.6
 -1 -6 -5 320.87 21.6
 -1 -6 -5 296.97 19.7
 -1 -6 -5 297.97 21.4
 -1 -6 -5 304.37 21.9
 -1 -6 -5 319.67 22.6
 -1 -6 -5 290.07 20.2
 -1 -6 -5 317.67 21.4
 -1 -6 -5 326.47 25.2
 2 6 5 3.4 2
 2 6 5 2.9 2.4
 2 6 5 2.3 2.4
 2 6 5 5.8 3.5
 2 6 5 4.9 2.9
 2 6 5 1.6 4
 2 6 5 6.2 1.6
 2 6 5 7.3 2.1
 2 6 5 4.6 3.3
 2 6 5 1.8 2
 2 6 5 4.1 1.7
 -2 -6 -5 5 4.4
 -2 -6 -5 11.6 2.5
 -2 -6 -5 5.2 3
 -2 -6 -5 8.1 3.4
 -2 -6 -5 5.9 2.3
 -2 -6 -5 7.9 4
 -2 -6 -5 5 2.7
 -2 -6 -5 5 3.1
 -2 -6 -5 7.4 3.7
 -2 -6 -5 6.6 2.3
 -2 -6 -5 8.7 2.1
 3 6 5 20.3 4
 3 6 5 12.6 2.9
 3 6 5 11 5.6
 3 6 5 18.1 4.8
 3 6 5 21.9 3.7
 3 6 5 17.1 4.1
 3 6 5 15.9 4.6
 3 6 5 9.8 3.4
 3 6 5 21.3 2.7
 -3 -6 -5 12.4 3.8
 -3 -6 -5 8 4.1
 -3 -6 -5 16.2 2.8
 -3 -6 -5 13.3 3.6
 -3 -6 -5 11.6 4.2
 -3 -6 -5 18.3 2.5
 -3 -6 -5 13.7 4.1
 -3 -6 -5 16.6 3.1
 -3 -6 -5 15.9 2.4
 -3 -6 -5 18.8 4
 -3 -6 -5 16.3 6.5
 4 6 5 543.35 34
 4 6 5 606.94 37.8
 4 6 5 563.74 34.5
 4 6 5 574.74 34.6
 4 6 5 571.54 36
 4 6 5 487.65 36.3
 4 6 5 540.65 35.9
 4 6 5 547.95 37.1
 4 6 5 461.65 41.1
 -4 -6 -5 590.84 33.4
 -4 -6 -5 553.94 35.2
 -4 -6 -5 571.04 33.7
 -4 -6 -5 502.75 41.6
 -4 -6 -5 549.65 37
 -4 -6 -5 574.54 35.7
 -4 -6 -5 582.24 34.4
 -4 -6 -5 550.94 35
 -4 -6 -5 522.55 38.4
 5 6 5 90.29 10.8
 5 6 5 72.09 8
 5 6 5 87.59 9.1
 5 6 5 90.09 8.8
 5 6 5 79.19 10.9
 5 6 5 81.59 6.4
 5 6 5 90.39 7.1
 5 6 5 94.19 7.8
 5 6 5 99.29 12.1
 -5 -6 -5 107.49 8.7
 -5 -6 -5 93.99 8.1
 -5 -6 -5 86.69 10.1
 -5 -6 -5 71.69 14.2
 -5 -6 -5 93.29 8
 -5 -6 -5 71.99 11.6
 -5 -6 -5 90.39 7.7
 -5 -6 -5 98.09 8.6
 -5 -6 -5 91.19 7.3
 6 6 5 71.79 8.9
 6 6 5 66.19 10.6
 6 6 5 70.69 8
 6 6 5 72.29 7.7
 6 6 5 67.99 8.9
 6 6 5 63.99 8.7
 6 6 5 66.39 10.4
 6 6 5 70.79 9.5
 -6 -6 -5 62.99 6.9
 -6 -6 -5 72.09 8
 -6 -6 -5 62.29 7.2
 -6 -6 -5 54.09 12.2
 -6 -6 -5 58.19 6.5
 -6 -6 -5 63.29 6.5
 -6 -6 -5 58.89 6.2
 -6 -6 -5 41.5 8.9
 -6 -6 -5 71.69 7.8
 -6 -6 -5 58.69 9.2
 7 6 5 98.79 10.9
 7 6 5 95.69 13.3
 7 6 5 106.99 10.6
 7 6 5 112.79 10.1
 7 6 5 102.39 12.1
 7 6 5 119.09 10.3
 7 6 5 140.09 12.3
 7 6 5 97.79 13.8
 7 6 5 109.29 9
 -7 -6 -5 81.39 16.5
 -7 -6 -5 113.19 9.9
 -7 -6 -5 119.79 9.5
 -7 -6 -5 111.49 8.9
 -7 -6 -5 121.39 9.9
 -7 -6 -5 104.59 12.4
 -7 -6 -5 115.39 9.3
 -7 -6 -5 105.09 9.7
 8 6 5 101.59 10.9
 8 6 5 78.99 12.7
 8 6 5 88.79 11.5
 8 6 5 96.49 11.5
 8 6 5 76.79 12.4
 8 6 5 86.59 7.8
 8 6 5 81.69 8.3
 8 6 5 91.59 11.2
 8 6 5 75.69 10.9
 -8 -6 -5 76.69 8.8
 -8 -6 -5 68.59 11.9
 -8 -6 -5 87.69 8.1
 -8 -6 -5 84.19 7.9
 -8 -6 -5 91.49 9.1
 -8 -6 -5 92.59 9.1
 -8 -6 -5 65.79 15.3
 -8 -6 -5 95.39 7.9
 9 6 5 115.19 15.9
 9 6 5 140.49 13.2
 9 6 5 136.39 17.5
 9 6 5 110.39 14.4
 9 6 5 118.79 10.5
 9 6 5 119.79 13.3
 9 6 5 104.39 9.8
 9 6 5 104.69 12.3
 9 6 5 91.39 11.6
 -9 -6 -5 97.89 19.3
 -9 -6 -5 101.09 8.6
 -9 -6 -5 120.39 11.1
 -9 -6 -5 101.19 10.5
 -9 -6 -5 102.89 10.4
 -9 -6 -5 86.29 13.6
 -9 -6 -5 99.99 9
 -9 -6 -5 89.89 9.4
 10 6 5 -0.8 3.5
 10 6 5 7 4.4
 10 6 5 -3.4 5
 10 6 5 4 4.2
 10 6 5 0.9 4.4
 10 6 5 2.6 4.4
 10 6 5 7.3 5.9
 10 6 5 8.6 5.6
 10 6 5 -0.7 3.5
 -10 -6 -5 1.9 2.8
 -10 -6 -5 2.4 3.8
 -10 -6 -5 6.1 3.9
 -10 -6 -5 11.4 6.4
 -10 -6 -5 8 6.4
 -10 -6 -5 5.2 2.2
 -10 -6 -5 -0.8 2.5
 -10 -6 -5 3.9 2.7
 11 6 5 445.46 35
 11 6 5 491.25 37.2
 11 6 5 491.95 34
 11 6 5 457.35 32.4
 11 6 5 453.25 33.4
 11 6 5 483.75 35.6
 11 6 5 492.25 37.7
 -11 -6 -5 443.26 31.8
 -11 -6 -5 448.36 33
 -11 -6 -5 453.25 33.2
 -11 -6 -5 493.75 32.6
 -11 -6 -5 447.86 29.4
 -11 -6 -5 491.35 29.9
 -11 -6 -5 447.56 37.1
 -11 -6 -5 489.15 32.9
 12 6 5 65.19 10.8
 12 6 5 71.49 14.5
 12 6 5 48.6 10.3
 12 6 5 71.29 13.9
 12 6 5 44 9
 12 6 5 56.89 9.2
 12 6 5 62.29 12.8
 -12 -6 -5 37.5 10.7
 -12 -6 -5 35.9 7.9
 -12 -6 -5 42.2 7.7
 -12 -6 -5 66.19 9.5
 -12 -6 -5 39.3 7.8
 -12 -6 -5 49.99 5.5
 -12 -6 -5 47.2 5.9
 13 6 5 118.69 15.3
 13 6 5 126.19 19.3
 13 6 5 95.49 16
 13 6 5 90.39 15.7
 13 6 5 117.69 18.9
 -13 -6 -5 102.49 8.8
 -13 -6 -5 103.89 8.4
 -13 -6 -5 83.89 13.1
 -13 -6 -5 90.19 16.5
 14 6 5 -3.8 6.1
 14 6 5 5.4 6.3
 14 6 5 -4.2 6.4
 14 6 5 9.3 7.7
 14 6 5 11.8 8.2
 -14 -6 -5 15.6 8.8
 -14 -6 -5 10.2 6.8
 -10 7 6 4.9 5.4
 -10 7 6 22.4 7
 -10 7 6 4.5 5.4
 -10 7 6 -6.6 2.9
 -10 7 6 8.2 6.7
 10 -7 -6 1.9 8.8
 10 -7 -6 7.5 9.3
 10 -7 -6 -0.7 7.4
 10 -7 -6 -0.6 5.6
 -9 7 6 38.9 9
 -9 7 6 85.49 12.5
 -9 7 6 69.99 10.3
 -9 7 6 67.89 11.4
 9 -7 -6 55.99 12.1
 9 -7 -6 52.59 12.9
 9 -7 -6 39.3 11.4
 9 -7 -6 48.5 14.8
 -8 7 6 11.4 5.2
 -8 7 6 8.2 5.3
 -8 7 6 8.8 5.3
 -8 7 6 10.2 5.6
 8 -7 -6 -1.2 6.7
 8 -7 -6 0.6 6.6
 8 -7 -6 6.5 5.4
 8 -7 -6 14.8 6.7
 -7 7 6 5.9 4.5
 -7 7 6 1.2 4.2
 -7 7 6 -4.1 5.4
 -7 7 6 4.3 4.8
 -7 7 6 4.9 5
 7 -7 -6 -7.8 4.3
 7 -7 -6 0 4.6
 7 -7 -6 13.2 5.5
 7 -7 -6 5.1 8.2
 -6 7 6 58.29 9.8
 -6 7 6 61.89 9
 -6 7 6 53.19 8.3
 -6 7 6 53.89 9.5
 -6 7 6 46.7 8.9
 -6 7 6 40.6 9.9
 6 -7 -6 30 6.1
 6 -7 -6 45.3 8.9
 6 -7 -6 59.09 13.2
 6 -7 -6 67.39 11.7
 6 -7 -6 44 8.6
 6 -7 -6 47.1 9.4
 -5 7 6 99.19 11.6
 -5 7 6 99.79 9.8
 -5 7 6 132.49 12.8
 -5 7 6 133.49 12.2
 -5 7 6 134.99 16
 -5 7 6 122.69 12.4
 -5 7 6 121.09 12.9
 5 -7 -6 136.29 13.4
 5 -7 -6 129.59 15.3
 5 -7 -6 98.39 8.1
 5 -7 -6 120.29 12.3
 5 -7 -6 109.59 14.2
 5 -7 -6 100.29 10.5
 5 -7 -6 116.89 14.9
 5 -7 -6 104.89 12.4
 5 -7 -6 131.89 18.8
 -4 7 6 36 6.9
 -4 7 6 31.4 6.9
 -4 7 6 32.6 7.3
 -4 7 6 32.8 6.5
 -4 7 6 36.1 6.2
 -4 7 6 30.4 6.8
 -4 7 6 28.3 6.3
 -4 7 6 30.9 8.5
 4 -7 -6 27.3 4.5
 4 -7 -6 25.2 6.1
 4 -7 -6 22.5 6.8
 4 -7 -6 34.8 8.3
 4 -7 -6 29.4 5.7
 4 -7 -6 43.7 8.3
 4 -7 -6 21.7 6.1
 4 -7 -6 16.3 6.6
 4 -7 -6 32.9 7.3
 4 -7 -6 34.4 9.7
 -3 7 6 29 5.7
 -3 7 6 19.7 6.4
 -3 7 6 27.3 5.9
 -3 7 6 25.9 5.9
 -3 7 6 23.2 5.7
 -3 7 6 27.6 6.2
 -3 7 6 29.8 8.1
 -3 7 6 27.3 6.2
 3 -7 -6 28 5.4
 3 -7 -6 26.2 6.6
 3 -7 -6 24.4 6.6
 3 -7 -6 25.1 5.9
 3 -7 -6 35.3 7.1
 3 -7 -6 28.2 6.4
 3 -7 -6 40 9.9
 3 -7 -6 26 7.2
 -2 7 6 20.3 4.7
 -2 7 6 22.1 5.6
 -2 7 6 25.9 5.4
 -2 7 6 22.1 5.2
 -2 7 6 18.4 5.4
 -2 7 6 17.7 4.1
 -2 7 6 22.9 5.2
 -2 7 6 20.1 5.4
 -2 7 6 16.2 7
 2 -7 -6 13.7 4.3
 2 -7 -6 12.4 4.8
 2 -7 -6 28.5 6
 2 -7 -6 13.2 5.8
 2 -7 -6 23.3 5.5
 2 -7 -6 18.1 4.9
 2 -7 -6 21.1 7.9
 2 -7 -6 23.9 6.7
 2 -7 -6 21.8 5.5
 2 -7 -6 8.8 4
 -1 7 6 17.3 4.6
 -1 7 6 8 3.8
 -1 7 6 10.5 4.1
 -1 7 6 9.4 3.7
 -1 7 6 8.6 3
 -1 7 6 7.9 5.4
 -1 7 6 14.6 3.5
 -1 7 6 11.7 4.4
 -1 7 6 8.6 3.5
 -1 7 6 7.6 4.1
 1 -7 -6 7.1 3.8
 1 -7 -6 9.5 5
 1 -7 -6 20.1 5.3
 1 -7 -6 11.5 4.4
 1 -7 -6 10.3 4.1
 1 -7 -6 7.4 5.1
 1 -7 -6 8.8 4.1
 1 -7 -6 17 4.8
 0 7 6 232.98 15
 0 7 6 210.78 14.6
 0 7 6 210.38 17.2
 0 7 6 213.38 14.2
 0 7 6 224.88 15.5
 0 7 6 214.38 16.5
 0 7 6 236.58 16.4
 0 7 6 209.88 16.5
 0 7 6 179.98 19.7
 0 -7 -6 245.38 20.3
 0 -7 -6 219.78 18.1
 0 -7 -6 176.98 15.6
 0 -7 -6 209.18 16
 0 -7 -6 192.38 15.1
 0 -7 -6 221.38 17.5
 0 -7 -6 218.18 17.1
 0 -7 -6 229.98 17
 0 -7 -6 227.68 17
 1 7 6 112.59 8.2
 1 7 6 114.39 8.8
 1 7 6 85.29 11.2
 1 7 6 109.99 7.5
 1 7 6 103.99 9.6
 1 7 6 106.59 8.4
 1 7 6 85.59 13.3
 1 7 6 104.69 10
 1 7 6 92.19 9.6
 -1 -7 -6 98.29 10.1
 -1 -7 -6 104.69 13.6
 -1 -7 -6 92.19 8.2
 -1 -7 -6 105.99 9.3
 -1 -7 -6 99.89 10.1
 -1 -7 -6 111.99 10.6
 -1 -7 -6 112.29 9.2
 -1 -7 -6 114.09 11.3
 -1 -7 -6 103.79 10.4
 -1 -7 -6 100.89 11.2
 2 7 6 107.09 15.7
 2 7 6 129.59 11.6
 2 7 6 138.39 12.5
 2 7 6 139.89 10.6
 2 7 6 148.19 13.3
 2 7 6 143.49 10.1
 2 7 6 142.89 11.9
 2 7 6 149.09 9.7
 -2 -7 -6 148.59 12.9
 -2 -7 -6 134.09 10.3
 -2 -7 -6 164.98 10.7
 -2 -7 -6 148.49 12.7
 -2 -7 -6 155.98 11.1
 -2 -7 -6 155.18 17
 -2 -7 -6 148.89 14.3
 -2 -7 -6 146.39 12.4
 -2 -7 -6 153.38 13.5
 -2 -7 -6 152.68 12.6
 -2 -7 -6 147.49 11
 3 7 6 45.3 6.5
 3 7 6 62.19 8.3
 3 7 6 62.69 8.1
 3 7 6 61.49 6.8
 3 7 6 34.6 9.4
 3 7 6 57.39 6.3
 3 7 6 64.69 9.3
 3 7 6 57.19 8.7
 3 7 6 55.19 4.7
 -3 -7 -6 54.39 7.8
 -3 -7 -6 43.2 8.5
 -3 -7 -6 60.39 5
 -3 -7 -6 60.69 8.5
 -3 -7 -6 46.9 10.4
 -3 -7 -6 56.99 5.3
 -3 -7 -6 51.79 7.3
 -3 -7 -6 56.79 5.6
 -3 -7 -6 47.5 7.8
 -3 -7 -6 63.79 8
 -3 -7 -6 65.09 5.7
 4 7 6 -1.1 1.6
 4 7 6 5 3.9
 4 7 6 -3.3 2.5
 4 7 6 2.1 3.1
 4 7 6 3.6 1.7
 4 7 6 -0.3 4
 4 7 6 -1 2.5
 4 7 6 1.3 4.7
 4 7 6 1.4 2.1
 4 7 6 -0.6 1.7
 -4 -7 -6 -2.9 1.9
 -4 -7 -6 -0.1 2.3
 -4 -7 -6 -2.4 1.5
 -4 -7 -6 -5.8 2.3
 -4 -7 -6 4.9 3.9
 -4 -7 -6 5.4 4
 -4 -7 -6 -1.9 3.8
 -4 -7 -6 0.8 2.6
 -4 -7 -6 0.1 1.4
 -4 -7 -6 1 1.9
 5 7 6 -1.2 2.8
 5 7 6 -0.6 3.2
 5 7 6 3.3 2.6
 5 7 6 -0.8 4
 5 7 6 1 2
 5 7 6 5.1 2.1
 5 7 6 -0.4 2.9
 5 7 6 0.9 3
 -5 -7 -6 8.5 3.8
 -5 -7 -6 3.3 2.9
 -5 -7 -6 0.4 3.3
 -5 -7 -6 1.3 1.9
 -5 -7 -6 5.2 5
 -5 -7 -6 1.5 2
 -5 -7 -6 -0.3 4.9
 -5 -7 -6 2.2 1.6
 -5 -7 -6 -0.1 2.6
 -5 -7 -6 -1.1 2.1
 6 7 6 206.58 18.9
 6 7 6 233.08 18.5
 6 7 6 200.38 18.3
 6 7 6 223.08 17.1
 6 7 6 222.18 15.8
 6 7 6 201.58 17.2
 6 7 6 197.38 14.5
 -6 -7 -6 232.68 16.6
 -6 -7 -6 203.08 18.7
 -6 -7 -6 201.88 15.5
 -6 -7 -6 194.18 23.7
 -6 -7 -6 210.78 15.9
 -6 -7 -6 250.37 15.2
 -6 -7 -6 218.28 15.5
 -6 -7 -6 173.18 19.4
 -6 -7 -6 213.98 16.3
 -6 -7 -6 223.68 14
 7 7 6 223.88 16.7
 7 7 6 207.18 20.1
 7 7 6 208.88 18.4
 7 7 6 221.68 15.4
 7 7 6 210.38 18.2
 7 7 6 214.58 19.8
 7 7 6 247.78 16.9
 7 7 6 211.48 17.7
 -7 -7 -6 224.28 16.2
 -7 -7 -6 214.18 21.4
 -7 -7 -6 247.08 16.8
 -7 -7 -6 236.58 16.1
 -7 -7 -6 219.88 16.7
 -7 -7 -6 212.88 20.1
 -7 -7 -6 225.58 16.6
 -7 -7 -6 215.28 16.1
 -7 -7 -6 227.58 25.6
 8 7 6 297.37 21.7
 8 7 6 288.07 22.2
 8 7 6 263.27 23.8
 8 7 6 289.07 19.4
 8 7 6 384.36 24
 8 7 6 276.07 20.3
 8 7 6 266.97 22.3
 8 7 6 299.97 20.8
 8 7 6 295.07 24.6
 -8 -7 -6 263.97 24.1
 -8 -7 -6 300.27 20.2
 -8 -7 -6 302.07 19.9
 -8 -7 -6 229.18 24.5
 -8 -7 -6 281.37 19.7
 -8 -7 -6 284.97 19
 -8 -7 -6 267.37 20.1
 -8 -7 -6 291.67 20
 -8 -7 -6 267.17 19.8
 -8 -7 -6 248.48 18.9
 -8 -7 -6 222.78 28.3
 9 7 6 4.2 6.5
 9 7 6 7.1 5.1
 9 7 6 3.3 4.1
 9 7 6 10.8 4
 9 7 6 2.7 3.7
 9 7 6 2.4 5.4
 9 7 6 8.7 5.1
 9 7 6 1 4
 -9 -7 -6 8.2 3.5
 -9 -7 -6 3 3.3
 -9 -7 -6 6.6 3.7
 -9 -7 -6 3.8 2.8
 -9 -7 -6 6.9 7.8
 -9 -7 -6 5.3 3
 -9 -7 -6 10 5.9
 -9 -7 -6 6.9 4.2
 10 7 6 262.97 20.3
 10 7 6 276.67 19.3
 10 7 6 253.67 20.2
 10 7 6 229.18 20.9
 10 7 6 224.68 22.2
 10 7 6 249.18 23.6
 10 7 6 233.98 21.2
 10 7 6 248.28 19.5
 -10 -7 -6 249.68 17.9
 -10 -7 -6 227.28 17
 -10 -7 -6 240.38 19.1
 -10 -7 -6 240.58 19.1
 -10 -7 -6 180.08 42.3
 -10 -7 -6 242.68 17.3
 -10 -7 -6 241.78 18.8
 -10 -7 -6 202.48 22.3
 11 7 6 57.09 12.6
 11 7 6 44.1 10.7
 11 7 6 46.4 9
 11 7 6 60.39 9.8
 11 7 6 68.79 11.9
 11 7 6 50.59 9.4
 11 7 6 32.9 10.2
 -11 -7 -6 44.6 7.8
 -11 -7 -6 41.4 10.9
 -11 -7 -6 71.49 7.6
 -11 -7 -6 57.99 6.5
 -11 -7 -6 41.7 8.2
 -11 -7 -6 63.49 9.8
 12 7 6 8.8 5.7
 12 7 6 2.5 4.7
 12 7 6 23.3 9.1
 12 7 6 0.6 4.6
 12 7 6 3.6 4.8
 12 7 6 9.5 6.3
 12 7 6 2.7 6.7
 -12 -7 -6 5.1 2.8
 -12 -7 -6 13 3.9
 -12 -7 -6 3.2 5.9
 -12 -7 -6 12.2 4.8
 -12 -7 -6 3.9 4.9
 13 7 6 -0.8 5.2
 13 7 6 -1.6 4.7
 13 7 6 9.9 8.5
 13 7 6 1.5 5.7
 13 7 6 5.4 7.5
 -13 -7 -6 10.8 3.5
 -13 -7 -6 4.5 2.4
 -13 -7 -6 4.2 6.9
 -13 -7 -6 6.5 4.9
 14 7 6 81.29 15.8
 14 7 6 97.19 18.4
 14 7 6 112.59 16.2
 14 7 6 107.79 18.8
 14 7 6 92.69 16.3
 -14 -7 -6 81.39 13.1
 -14 -7 -6 86.89 17.4
 -9 8 7 2.4 5
 -9 8 7 12.8 6.6
 -9 8 7 2.6 5.3
 -9 8 7 14.8 6.8
 9 -8 -7 6.5 7.3
 9 -8 -7 6.2 9.4
 9 -8 -7 6.6 6.4
 9 -8 -7 22.5 12.3
 -8 8 7 5.4 5.3
 -8 8 7 -1.4 4.3
 -8 8 7 -0.3 5
 -8 8 7 1 4.5
 8 -8 -7 5.4 9
 8 -8 -7 4.9 5.8
 8 -8 -7 7.7 7.5
 8 -8 -7 -3.2 5.5
 -7 8 7 61.89 10.7
 -7 8 7 76.89 12
 -7 8 7 65.99 10.2
 -7 8 7 80.99 13.5
 7 -8 -7 86.29 13.3
 7 -8 -7 80.79 13.2
 7 -8 -7 64.79 12.3
 7 -8 -7 73.39 16.1
 -6 8 7 8.5 5
 -6 8 7 10.5 7.6
 -6 8 7 7.5 4.6
 -6 8 7 3.8 5
 -6 8 7 15.7 6
 6 -8 -7 10.4 6.6
 6 -8 -7 9 6.3
 6 -8 -7 1.4 7.8
 6 -8 -7 5.9 4.9
 6 -8 -7 5.2 4.6
 6 -8 -7 1.7 3.9
 -5 8 7 -2.5 3.5
 -5 8 7 6.4 6.8
 -5 8 7 -4.3 3.4
 -5 8 7 -3.1 3.5
 -5 8 7 -5.5 3
 -5 8 7 9.2 5.2
 -5 8 7 3.4 3.8
 5 -8 -7 5 5.6
 5 -8 -7 5 5.1
 5 -8 -7 -1.6 3.8
 5 -8 -7 -1.1 3.6
 5 -8 -7 1.8 4.4
 5 -8 -7 2.9 7.1
 -4 8 7 8.7 4.5
 -4 8 7 10.7 7.4
 -4 8 7 9.8 5
 -4 8 7 6.9 4.8
 -4 8 7 12.8 5.3
 -4 8 7 16.2 5.2
 -4 8 7 9.6 4.4
 4 -8 -7 14.1 6
 4 -8 -7 0.9 4.5
 4 -8 -7 22.6 6.4
 4 -8 -7 7.6 4.9
 4 -8 -7 7.8 5.7
 4 -8 -7 1.1 4
 4 -8 -7 16.3 6
 4 -8 -7 14.4 8.4
 4 -8 -7 16.9 6.6
 -3 8 7 4.6 4.4
 -3 8 7 8.1 4.2
 -3 8 7 3.4 3.7
 -3 8 7 9.3 6.5
 -3 8 7 6.7 4.3
 -3 8 7 14.3 5.5
 -3 8 7 -0.9 2.8
 -3 8 7 3.7 3.9
 3 -8 -7 2.2 4.2
 3 -8 -7 6.2 3.9
 3 -8 -7 9.6 5.2
 3 -8 -7 17.9 5.8
 3 -8 -7 7.2 5
 3 -8 -7 4.8 5.6
 3 -8 -7 4.8 4.8
 3 -8 -7 1.9 6.8
 -2 8 7 87.89 10.3
 -2 8 7 81.09 11.5
 -2 8 7 86.69 10.8
 -2 8 7 64.99 12.9
 -2 8 7 72.89 8.6
 -2 8 7 88.29 10.3
 -2 8 7 86.49 8.8
 -2 8 7 68.19 9.7
 -2 8 7 58.19 7.3
 2 -8 -7 81.69 10.5
 2 -8 -7 60.79 9.8
 2 -8 -7 65.29 8.6
 2 -8 -7 84.59 10.2
 2 -8 -7 75.09 11.2
 2 -8 -7 64.69 10.1
 2 -8 -7 78.09 11.8
 2 -8 -7 77.39 10.4
 2 -8 -7 64.09 12.1
 -1 8 7 52.39 6.5
 -1 8 7 49.2 8
 -1 8 7 47.5 7.6
 -1 8 7 43.1 5.9
 -1 8 7 53.69 8.7
 -1 8 7 32.4 9.1
 -1 8 7 46.5 7.4
 -1 8 7 53.29 7.2
 -1 8 7 55.29 8.3
 1 -8 -7 40.1 7.5
 1 -8 -7 48.6 10.3
 1 -8 -7 47.6 9
 1 -8 -7 35.4 7.4
 1 -8 -7 51.29 8.9
 1 -8 -7 49.6 7.7
 1 -8 -7 44.9 7.5
 1 -8 -7 49.9 8.3
 0 8 7 114.49 9
 0 8 7 99.09 8.2
 0 8 7 98.69 9.6
 0 8 7 96.49 10.2
 0 8 7 121.89 11.5
 0 8 7 102.69 8.8
 0 8 7 97.39 14.8
 0 8 7 122.99 11.1
 0 8 7 113.99 12.9
 0 -8 -7 83.89 11.7
 0 -8 -7 118.69 14.4
 0 -8 -7 90.29 10.8
 0 -8 -7 103.39 13.2
 0 -8 -7 113.69 13.4
 0 -8 -7 111.39 11.6
 0 -8 -7 114.29 12
 0 -8 -7 103.29 10.3
 1 8 7 45.2 11
 1 8 7 51.19 6.3
 1 8 7 55.89 7.7
 1 8 7 50.59 7.5
 1 8 7 70.89 9.8
 1 8 7 56.19 6
 1 8 7 47.8 6
 1 8 7 53.19 4.8
 1 8 7 48.3 7.7
 -1 -8 -7 42.3 5.9
 -1 -8 -7 50.59 6.8
 -1 -8 -7 47.6 7.9
 -1 -8 -7 38.8 7.7
 -1 -8 -7 58.79 8.5
 -1 -8 -7 43.9 10.3
 -1 -8 -7 46.3 7.4
 -1 -8 -7 60.59 7.9
 -1 -8 -7 53.69 9.2
 2 8 7 87.19 7.9
 2 8 7 93.39 9.9
 2 8 7 93.69 11.2
 2 8 7 84.89 6.7
 2 8 7 87.19 9.2
 2 8 7 91.69 11.9
 2 8 7 90.19 7.3
 2 8 7 57.99 13.2
 -2 -8 -7 104.99 11
 -2 -8 -7 101.29 12.6
 -2 -8 -7 101.09 7.9
 -2 -8 -7 122.99 15.7
 -2 -8 -7 83.29 8.2
 -2 -8 -7 107.39 10.6
 -2 -8 -7 90.79 8.4
 -2 -8 -7 63.99 10
 -2 -8 -7 94.19 11.7
 3 8 7 101.09 12.5
 3 8 7 127.59 11.3
 3 8 7 101.09 10.2
 3 8 7 102.09 7.6
 3 8 7 97.09 10.9
 3 8 7 115.69 9.2
 3 8 7 83.29 16.3
 3 8 7 115.59 9.7
 3 8 7 105.99 10
 -3 -8 -7 108.89 8.8
 -3 -8 -7 114.59 11.9
 -3 -8 -7 98.89 11.7
 -3 -8 -7 122.69 11
 -3 -8 -7 107.89 10.8
 -3 -8 -7 79.99 11.6
 -3 -8 -7 109.69 8.1
 -3 -8 -7 102.29 8.7
 -3 -8 -7 82.69 12.6
 -3 -8 -7 94.99 8.6
 -3 -8 -7 111.59 16.4
 4 8 7 43.6 8.4
 4 8 7 27 10
 4 8 7 44.2 8.6
 4 8 7 50.79 4.8
 4 8 7 52.99 7.1
 4 8 7 37.4 5.6
 4 8 7 44.5 5.8
 4 8 7 36.6 6.9
 4 8 7 53.89 8.7
 -4 -8 -7 48.1 9.4
 -4 -8 -7 45.1 7.7
 -4 -8 -7 42.4 4.6
 -4 -8 -7 48.5 5.9
 -4 -8 -7 50.79 5.8
 -4 -8 -7 41.8 5
 -4 -8 -7 35 8
 -4 -8 -7 38.2 6.7
 -4 -8 -7 46.6 4.8
 -4 -8 -7 46.9 7.6
 -4 -8 -7 44.9 11.7
 5 8 7 282.87 20.3
 5 8 7 329.17 24.6
 5 8 7 302.87 20.4
 5 8 7 263.27 23
 5 8 7 287.67 23.3
 5 8 7 275.67 21.9
 5 8 7 294.77 19.7
 5 8 7 277.67 21.9
 -5 -8 -7 299.27 18.5
 -5 -8 -7 301.97 21.2
 -5 -8 -7 279.77 21.4
 -5 -8 -7 297.27 29.8
 -5 -8 -7 276.57 21.9
 -5 -8 -7 302.37 23.7
 -5 -8 -7 307.37 19.1
 -5 -8 -7 327.27 20.2
 -5 -8 -7 287.47 21.9
 -5 -8 -7 260.17 24.9
 -5 -8 -7 290.77 18.9
 6 8 7 1.4 4.1
 6 8 7 9.6 6.1
 6 8 7 2.9 3.7
 6 8 7 -3.5 3
 6 8 7 2.5 3.9
 6 8 7 -0.4 2.5
 6 8 7 -1 2
 6 8 7 1.1 2.2
 -6 -8 -7 1.6 3
 -6 -8 -7 3.4 2.8
 -6 -8 -7 -2.7 2.5
 -6 -8 -7 -3.5 1.6
 -6 -8 -7 -0.3 2.1
 -6 -8 -7 -1.3 2.1
 -6 -8 -7 -5 2.9
 -6 -8 -7 -2.4 3.6
 -6 -8 -7 -2.1 2.2
 -6 -8 -7 -3.6 4.4
 -6 -8 -7 -2.3 5.7
 7 8 7 223.58 17.9
 7 8 7 226.68 15.8
 7 8 7 209.38 19.7
 7 8 7 186.78 18.2
 7 8 7 230.38 20.6
 7 8 7 206.28 16.1
 7 8 7 194.18 17.7
 -7 -8 -7 220.78 17.1
 -7 -8 -7 222.88 16
 -7 -8 -7 159.68 20.4
 -7 -8 -7 215.78 20.4
 -7 -8 -7 217.18 16
 -7 -8 -7 230.68 26.7
 -7 -8 -7 201.88 15
 -7 -8 -7 211.88 15.3
 8 8 7 1.3 4.4
 8 8 7 -2.7 3.1
 8 8 7 -1.3 3
 8 8 7 -4.2 4.7
 8 8 7 -2 2.9
 8 8 7 1.9 3.3
 8 8 7 -1 4
 -8 -8 -7 -0.1 3.3
 -8 -8 -7 0.4 3.3
 -8 -8 -7 -2.1 4.9
 -8 -8 -7 1.9 5.7
 -8 -8 -7 -0.3 2.5
 -8 -8 -7 2.7 3.1
 -8 -8 -7 0 2.9
 -8 -8 -7 1.6 2.3
 -8 -8 -7 1 4.6
 -8 -8 -7 1.9 1.9
 9 8 7 317.77 27
 9 8 7 338.87 29.3
 9 8 7 342.57 27.1
 9 8 7 351.76 26.4
 9 8 7 388.86 30.4
 9 8 7 382.06 25.8
 9 8 7 358.66 25
 -9 -8 -7 354.26 29.9
 -9 -8 -7 354.86 24.7
 -9 -8 -7 349.07 23.4
 -9 -8 -7 369.46 24.8
 -9 -8 -7 270.77 29.4
 -9 -8 -7 332.77 23.6
 -9 -8 -7 377.46 25.2
 -9 -8 -7 363.96 24.8
 10 8 7 1.5 4.1
 10 8 7 10.5 6.8
 10 8 7 2 6.2
 10 8 7 11.5 5.4
 10 8 7 9.1 4.3
 10 8 7 1.6 4
 10 8 7 3.8 5.6
 -10 -8 -7 7 6.3
 -10 -8 -7 7 4.4
 -10 -8 -7 1.8 5.7
 -10 -8 -7 3.5 3.9
 -10 -8 -7 4.4 3.7
 -10 -8 -7 8.9 4.7
 11 8 7 5.8 5.2
 11 8 7 6.5 7.3
 11 8 7 -2.2 5.3
 11 8 7 9.2 5.8
 11 8 7 1.1 3.7
 11 8 7 4 4.8
 11 8 7 12.5 8.5
 -11 -8 -7 1.2 4.3
 -11 -8 -7 -2.6 2.3
 -11 -8 -7 0.3 6.3
 -11 -8 -7 1.6 5.8
 -11 -8 -7 -1.7 3.3
 12 8 7 0.9 6.4
 12 8 7 -2.2 5.5
 12 8 7 5.9 4.9
 12 8 7 12.1 8.2
 12 8 7 -3.3 4.3
 12 8 7 4.6 6.7
 12 8 7 -6.5 3.7
 -12 -8 -7 -3.1 2.6
 -12 -8 -7 2.2 5.7
 -12 -8 -7 -4.1 3.4
 -12 -8 -7 8.1 7.1
 13 8 7 -7.5 4.6
 13 8 7 -5.9 4.7
 13 8 7 -4.4 6.8
 13 8 7 -1.5 5.3
 13 8 7 -5.4 6.2
 13 8 7 -5 5.8
 -13 -8 -7 0 4.9
 -13 -8 -7 6.1 3.9
 -13 -8 -7 -8.7 4.8
 -13 -8 -7 3.7 7.7
 9 -9 -8 20.8 9.6
 9 -9 -8 6.4 10.8
 -8 9 8 0.4 5.5
 -8 9 8 0.4 4.7
 -8 9 8 -5 4.3
 -8 9 8 9.4 6.2
 8 -9 -8 2.6 6.7
 8 -9 -8 -0.7 9.2
 8 -9 -8 -1.1 6.1
 -7 9 8 -2.1 4.5
 -7 9 8 1.1 5.1
 -7 9 8 -3.2 4.9
 -7 9 8 2.9 5.2
 7 -9 -8 -6.7 4.3
 7 -9 -8 0.1 9.5
 7 -9 -8 -6.4 5
 7 -9 -8 7.8 5.1
 7 -9 -8 -2.1 5.2
 -6 9 8 49.99 9.7
 -6 9 8 58.59 10.4
 -6 9 8 64.99 10.4
 -6 9 8 41.9 9.5
 6 -9 -8 39.7 9.7
 6 -9 -8 24.9 7.7
 6 -9 -8 39 9.6
 6 -9 -8 44.3 13.1
 6 -9 -8 53.39 11.2
 -5 9 8 11.3 5.4
 -5 9 8 1.8 4.5
 -5 9 8 3.9 7.5
 -5 9 8 4.7 5.8
 -5 9 8 1.9 4
 -5 9 8 -4.9 3.7
 -5 9 8 1.2 4.4
 5 -9 -8 1.2 8.3
 5 -9 -8 -0.4 5.1
 5 -9 -8 5.9 5.8
 5 -9 -8 0.8 5
 5 -9 -8 -1.2 5
 5 -9 -8 7.5 7
 5 -9 -8 18.6 7.9
 -4 9 8 -1.1 4.1
 -4 9 8 10.2 6.4
 -4 9 8 8.3 5
 -4 9 8 7.4 4.8
 -4 9 8 14.8 5.4
 -4 9 8 0.6 6.4
 -4 9 8 14.3 5.7
 -4 9 8 14.2 5.7
 4 -9 -8 9.4 6.4
 4 -9 -8 5.4 6.2
 4 -9 -8 2.4 5
 4 -9 -8 5.9 7.8
 4 -9 -8 6.3 4.9
 4 -9 -8 4.6 9.1
 4 -9 -8 4 5.7
 4 -9 -8 6.3 5.3
 -3 9 8 50.59 8
 -3 9 8 55.49 9.4
 -3 9 8 58.49 9
 -3 9 8 26.6 9.8
 -3 9 8 67.19 11.1
 -3 9 8 58.99 9.6
 -3 9 8 56.79 9.1
 -3 9 8 46.8 7.4
 -3 9 8 71.09 10.5
 3 -9 -8 53.89 8.7
 3 -9 -8 54.79 11.3
 3 -9 -8 53.89 11.5
 3 -9 -8 56.59 9.8
 3 -9 -8 51.79 10
 3 -9 -8 50.59 12.4
 3 -9 -8 66.09 11.6
 3 -9 -8 62.39 10.4
 -2 9 8 97.99 12.6
 -2 9 8 113.89 11.4
 -2 9 8 84.89 11.3
 -2 9 8 103.59 16.2
 -2 9 8 110.79 11
 -2 9 8 108.19 10.3
 -2 9 8 109.59 13.1
 -2 9 8 90.29 9.4
 -2 9 8 109.69 13.3
 2 -9 -8 108.89 14.7
 2 -9 -8 99.49 13.1
 2 -9 -8 106.09 14.3
 2 -9 -8 106.19 12.5
 2 -9 -8 84.69 12.2
 2 -9 -8 104.69 12.6
 2 -9 -8 83.39 11.2
 2 -9 -8 101.39 14.4
 2 -9 -8 136.49 17.7
 -1 9 8 223.98 15.4
 -1 9 8 177.88 14.6
 -1 9 8 187.98 14.5
 -1 9 8 254.57 18.4
 -1 9 8 188.48 17.3
 -1 9 8 216.48 18
 -1 9 8 165.98 21.5
 -1 9 8 193.28 16.4
 -1 9 8 206.48 16.2
 1 -9 -8 199.78 19.5
 1 -9 -8 212.68 18
 1 -9 -8 203.28 16.7
 1 -9 -8 190.38 17.6
 1 -9 -8 223.78 19.9
 1 -9 -8 215.98 21.2
 1 -9 -8 178.78 16.8
 1 -9 -8 224.08 18.2
 1 -9 -8 191.68 16.7
 0 9 8 6.3 3.5
 0 9 8 0.3 2.1
 0 9 8 0.1 2.3
 0 9 8 5.2 4.2
 0 9 8 1.6 5.4
 0 9 8 2.7 4.3
 0 9 8 0.2 4.1
 0 9 8 -3 3
 0 9 8 2.2 2.9
 0 -9 -8 1.8 4.3
 0 -9 -8 5 3.9
 0 -9 -8 0.5 4.5
 0 -9 -8 5.1 4.6
 0 -9 -8 -0.4 4.8
 0 -9 -8 2.7 3.8
 0 -9 -8 -1.8 3.5
 0 -9 -8 5.9 5.7
 1 9 8 337.07 22.6
 1 9 8 317.47 22.2
 1 9 8 351.26 25
 1 9 8 267.97 29.3
 1 9 8 333.27 25.9
 1 9 8 325.07 21.8
 1 9 8 326.47 24.6
 1 9 8 295.97 21
 1 9 8 394.06 25
 -1 -9 -8 357.06 26.9
 -1 -9 -8 325.57 25
 -1 -9 -8 351.46 23.8
 -1 -9 -8 344.57 25.7
 -1 -9 -8 371.76 25.8
 -1 -9 -8 361.86 26.9
 -1 -9 -8 325.77 29.6
 -1 -9 -8 323.97 23.4
 2 9 8 11.2 4.7
 2 9 8 4.8 3.4
 2 9 8 11.4 4.3
 2 9 8 9.4 2.9
 2 9 8 12 3.6
 2 9 8 8.3 2.4
 2 9 8 9.3 7.2
 2 9 8 12.7 5.9
 2 9 8 12.7 5.1
 -2 -9 -8 3.7 5
 -2 -9 -8 11 6.5
 -2 -9 -8 8.8 3.7
 -2 -9 -8 10.3 7.2
 -2 -9 -8 14.7 3.7
 -2 -9 -8 14.5 6.5
 -2 -9 -8 8.1 5.2
 -2 -9 -8 11.9 5.2
 -2 -9 -8 12.3 4.1
 3 9 8 12.5 7.5
 3 9 8 12.6 5.5
 3 9 8 7.3 4.5
 3 9 8 6.2 2.2
 3 9 8 12.4 3.9
 3 9 8 2.2 3.5
 3 9 8 3 3.7
 3 9 8 4.4 3.3
 3 9 8 9.6 4.7
 -3 -9 -8 19.1 6
 -3 -9 -8 5.5 3.2
 -3 -9 -8 8.2 3.3
 -3 -9 -8 2 5.2
 -3 -9 -8 7.3 5.5
 -3 -9 -8 -1.7 5.7
 -3 -9 -8 6.6 3.4
 -3 -9 -8 9.3 4.7
 -3 -9 -8 4 2.6
 -3 -9 -8 9.4 6.1
 4 9 8 74.79 9.4
 4 9 8 81.79 6.6
 4 9 8 60.49 14.3
 4 9 8 77.69 12
 4 9 8 79.09 9.1
 4 9 8 72.49 10.8
 4 9 8 70.69 11.5
 4 9 8 82.19 8.3
 4 9 8 73.89 10.8
 -4 -9 -8 86.59 8
 -4 -9 -8 74.99 15.7
 -4 -9 -8 72.09 6.6
 -4 -9 -8 82.79 10.4
 -4 -9 -8 85.39 12
 -4 -9 -8 81.39 7.3
 -4 -9 -8 82.69 10.8
 -4 -9 -8 71.59 12.6
 -4 -9 -8 100.09 12.6
 5 9 8 4.6 3
 5 9 8 0.1 2.2
 5 9 8 -1.3 2.7
 5 9 8 0.6 3.6
 5 9 8 4.1 3.7
 5 9 8 2.1 4
 5 9 8 -1.7 4.2
 -5 -9 -8 0.1 2.8
 -5 -9 -8 -1.9 4.6
 -5 -9 -8 2.1 3.7
 -5 -9 -8 3.7 5.3
 -5 -9 -8 1.2 3.5
 -5 -9 -8 0.7 4.7
 -5 -9 -8 -2.9 2.2
 -5 -9 -8 -1.2 5.7
 -5 -9 -8 0.6 4.2
 -5 -9 -8 -3.6 1.9
 6 9 8 11 3.7
 6 9 8 13.4 3.9
 6 9 8 6.4 5.3
 6 9 8 11.1 5.2
 6 9 8 4.6 3.6
 6 9 8 6.4 5.1
 6 9 8 10.8 5.3
 -6 -9 -8 11 6
 -6 -9 -8 10.1 7.9
 -6 -9 -8 11.3 3.3
 -6 -9 -8 5.9 4.9
 -6 -9 -8 -0.3 2.9
 -6 -9 -8 8.3 3.9
 -6 -9 -8 4.5 3.7
 -6 -9 -8 1.6 5.8
 7 9 8 1.7 6
 7 9 8 5.9 3.5
 7 9 8 0.3 3.9
 7 9 8 3.2 5.1
 7 9 8 -1.9 3.5
 7 9 8 8.4 5
 -7 -9 -8 -1 2.8
 -7 -9 -8 6.3 5.8
 -7 -9 -8 -1.7 3.8
 -7 -9 -8 -0.3 6.8
 -7 -9 -8 0.6 2.4
 -7 -9 -8 -4.6 2.2
 -7 -9 -8 -4.4 4.5
 8 9 8 1.3 3.2
 8 9 8 -0.9 4.8
 8 9 8 1.5 4.1
 8 9 8 -0.1 3.8
 8 9 8 -5 5.2
 8 9 8 -3.1 4.8
 -8 -9 -8 -0.5 5.3
 -8 -9 -8 -4.5 3
 -8 -9 -8 2.7 3.2
 -8 -9 -8 1.3 3.5
 -8 -9 -8 3 4.2
 -8 -9 -8 0.9 4.5
 9 9 8 11.7 5.8
 9 9 8 -3 6
 9 9 8 10 6.1
 9 9 8 16 7.2
 9 9 8 21.9 7.8
 9 9 8 7.8 4.9
 -9 -9 -8 10 4.9
 -9 -9 -8 17.9 8.9
 -9 -9 -8 22.6 5.3
 -9 -9 -8 15.4 7.9
 -9 -9 -8 10 4.5
 -9 -9 -8 11.2 4.4
 10 9 8 1.6 5.5
 10 9 8 -2.2 4.3
 10 9 8 4.8 6
 10 9 8 4.6 7.7
 10 9 8 9.4 6
 -10 -9 -8 6 3.7
 -10 -9 -8 5.4 4.3
 -10 -9 -8 -5.4 4.5
 -10 -9 -8 2.4 6.5
 -10 -9 -8 -3.6 3.4
 -10 -9 -8 3.3 4
 11 9 8 8.8 6.2
 11 9 8 21.3 8.1
 11 9 8 25.7 7.1
 11 9 8 14.9 8.5
 11 9 8 14.2 8.3
 -11 -9 -8 17.3 9.6
 -11 -9 -8 13.7 8.9
 -11 -9 -8 14.9 5.2
 12 9 8 3 5
 12 9 8 1.5 7.5
 12 9 8 -2.2 5.5
 12 9 8 -1.4 6.4
 12 9 8 2.6 5.7
 -12 -9 -8 -4.4 6.5
 -12 -9 -8 9.5 4.7
 -12 -9 -8 6 8.8
 13 9 8 -0.6 6.6
 13 9 8 2.7 6.4
 13 9 8 4.9 5.9
 13 9 8 13.3 9.6
 -13 -9 -8 -4.3 6.9
 -13 -9 -8 15.5 4.4
 -13 -9 -8 6.3 8.4
 -7 10 9 -5 4.7
 -7 10 9 13.5 7
 -7 10 9 2.7 4.8
 -7 10 9 5.2 5.9
 -7 10 9 -5.8 4.6
 7 -10 -9 -5.7 5.3
 7 -10 -9 4.5 7.4
 7 -10 -9 0.1 6.6
 7 -10 -9 10.3 11
 -6 10 9 184.18 16.4
 -6 10 9 187.18 17.1
 -6 10 9 155.08 20.3
 -6 10 9 162.68 16.4
 -6 10 9 158.98 18.8
 6 -10 -9 142.19 19.5
 6 -10 -9 168.58 21
 6 -10 -9 167.28 20.8
 6 -10 -9 147.19 24
 6 -10 -9 139.89 17.1
 -5 10 9 88.89 14.3
 -5 10 9 72.19 11
 -5 10 9 62.39 10.1
 -5 10 9 56.99 9.9
 -5 10 9 72.99 12.3
 5 -10 -9 61.99 11.7
 5 -10 -9 41 11.4
 5 -10 -9 28.7 11.2
 5 -10 -9 64.89 12.5
 5 -10 -9 49.99 11
 5 -10 -9 58.49 11.9
 -4 10 9 -5.3 3.7
 -4 10 9 5.1 5.4
 -4 10 9 -1.7 3.7
 -4 10 9 6.8 5.6
 -4 10 9 2.5 9.3
 -4 10 9 0.3 4.8
 -4 10 9 2.7 4.8
 -4 10 9 3.6 5.5
 4 -10 -9 1.2 5.6
 4 -10 -9 -1.9 4.8
 4 -10 -9 10.5 6.6
 4 -10 -9 -6.2 7.9
 4 -10 -9 -1.4 6.2
 4 -10 -9 -6.1 4.2
 -3 10 9 8.4 5.4
 -3 10 9 13 6
 -3 10 9 3.7 5.1
 -3 10 9 5.2 7.8
 -3 10 9 14.2 6.4
 -3 10 9 14 5.7
 -3 10 9 5.6 4.1
 -3 10 9 3 5
 3 -10 -9 2.2 5.1
 3 -10 -9 1.9 5.8
 3 -10 -9 6.7 7.9
 3 -10 -9 -1.2 6.1
 3 -10 -9 4.8 5.8
 3 -10 -9 22 10.7
 -2 10 9 -2.9 3.3
 -2 10 9 0.3 3.8
 -2 10 9 -0.3 3.9
 -2 10 9 2.4 3.6
 -2 10 9 -2.8 3.4
 -2 10 9 4.1 4.9
 -2 10 9 -5.9 3.7
 -2 10 9 2 6.8
 2 -10 -9 -0.9 5
 2 -10 -9 -7.7 5.8
 2 -10 -9 1.4 5.1
 2 -10 -9 -7 4.1
 2 -10 -9 7 7.1
 2 -10 -9 -2.3 4.1
 2 -10 -9 -1.2 5.3
 2 -10 -9 -1 4.6
 -1 10 9 319.47 23.4
 -1 10 9 282.87 21.5
 -1 10 9 290.77 20.4
 -1 10 9 268.17 22
 -1 10 9 312.57 24
 -1 10 9 244.38 19.8
 -1 10 9 297.77 23.7
 1 -10 -9 266.07 23.3
 1 -10 -9 294.67 22.7
 1 -10 -9 283.77 23.6
 1 -10 -9 277.47 25.2
 1 -10 -9 291.17 27
 1 -10 -9 310.57 24.2
 1 -10 -9 259.67 22.5
 1 -10 -9 306.17 25.7
 0 10 9 25.2 7.6
 0 10 9 23.4 5.4
 0 10 9 23.7 6.9
 0 10 9 26 10.3
 0 10 9 22.7 6.4
 0 10 9 21.5 5
 0 10 9 32.2 5.3
 0 10 9 35 7.1
 0 -10 -9 33 9.9
 0 -10 -9 28.5 6.8
 0 -10 -9 29.8 7.8
 0 -10 -9 29.9 9.3
 0 -10 -9 21 6.2
 0 -10 -9 22.7 7.3
 0 -10 -9 30 8.2
 0 -10 -9 32.1 10.7
 1 10 9 111.79 10.8
 1 10 9 113.39 15.6
 1 10 9 96.19 13.5
 1 10 9 144.89 14
 1 10 9 153.68 13.7
 1 10 9 122.69 10.3
 -1 -10 -9 142.39 14.8
 -1 -10 -9 138.19 12.3
 -1 -10 -9 113.69 12.1
 -1 -10 -9 128.49 18.3
 -1 -10 -9 137.89 17
 -1 -10 -9 141.79 15.7
 -1 -10 -9 146.39 14.5
 2 10 9 -3.6 4.9
 2 10 9 2.9 2.7
 2 10 9 0.5 4.8
 2 10 9 0.3 3.4
 2 10 9 -0.5 4.2
 2 10 9 -1.7 2.1
 2 10 9 -2.9 3.1
 2 10 9 2.2 3.5
 -2 -10 -9 2.1 3.6
 -2 -10 -9 0.4 5.3
 -2 -10 -9 -2.2 6.2
 -2 -10 -9 1.6 3.4
 -2 -10 -9 1 5.2
 -2 -10 -9 -6.1 5
 -2 -10 -9 3 4.5
 3 10 9 28.4 6.3
 3 10 9 33.9 6.1
 3 10 9 19.6 6.8
 3 10 9 42.3 8.3
 3 10 9 33.5 8.3
 3 10 9 39.7 8.1
 -3 -10 -9 33.5 8.9
 -3 -10 -9 23.3 6.5
 -3 -10 -9 37.8 9.1
 -3 -10 -9 29.3 5.2
 -3 -10 -9 35.3 6
 -3 -10 -9 29.1 11.4
 -3 -10 -9 35.2 9.5
 4 10 9 75.39 12.3
 4 10 9 90.89 11.2
 4 10 9 60.69 10.2
 4 10 9 84.09 9.9
 4 10 9 61.99 11.1
 4 10 9 78.49 12
 -4 -10 -9 99.49 13.2
 -4 -10 -9 87.29 8.4
 -4 -10 -9 59.09 12
 -4 -10 -9 80.69 17.2
 -4 -10 -9 85.49 12.2
 -4 -10 -9 69.39 10.9
 -4 -10 -9 67.19 11.5
 5 10 9 50.29 10.6
 5 10 9 51.29 8.1
 5 10 9 48 7.4
 5 10 9 88.09 12.4
 5 10 9 76.99 12.4
 5 10 9 68.59 11.2
 -5 -10 -9 64.69 11.1
 -5 -10 -9 71.49 11.9
 -5 -10 -9 55.89 12.6
 -5 -10 -9 39 13.6
 -5 -10 -9 62.19 9.4
 -5 -10 -9 67.49 7.6
 6 10 9 6.9 3.8
 6 10 9 13 7
 6 10 9 8.7 5.6
 6 10 9 -0.6 4.1
 6 10 9 8.4 5.6
 -6 -10 -9 10.1 5.3
 -6 -10 -9 0.4 6
 -6 -10 -9 0 3.3
 -6 -10 -9 6.9 6.9
 -6 -10 -9 3.4 6
 7 10 9 20.7 8.1
 7 10 9 29.5 8.1
 7 10 9 29.4 6.2
 7 10 9 35.1 9.1
 7 10 9 41.5 9
 -7 -10 -9 46.7 7.4
 -7 -10 -9 21.2 9.2
 -7 -10 -9 35 8.2
 -7 -10 -9 42.8 10.3
 -7 -10 -9 39 6.8
 8 10 9 24.4 6.3
 8 10 9 30.5 9.5
 8 10 9 25.2 9.2
 8 10 9 46.3 9.4
 8 10 9 42.1 10.1
 8 10 9 37.6 9.4
 -8 -10 -9 27.6 8.9
 -8 -10 -9 28.9 6
 -8 -10 -9 18.7 9
 -8 -10 -9 39.5 7.4
 -8 -10 -9 44.1 8.6
 9 10 9 65.29 12
 9 10 9 64.39 11.2
 9 10 9 52.69 13
 9 10 9 48.5 11.8
 9 10 9 43.6 9.7
 -9 -10 -9 55.59 12.5
 -9 -10 -9 63.09 10.1
 -9 -10 -9 68.99 9.3
 -9 -10 -9 39 11.9
 -9 -10 -9 57.99 8.4
 10 10 9 114.29 15.9
 10 10 9 107.79 18.1
 10 10 9 126.99 17.4
 10 10 9 117.19 15.7
 10 10 9 95.09 17.2
 -10 -10 -9 99.89 17.6
 -10 -10 -9 142.59 13.4
 -10 -10 -9 104.49 17.5
 -10 -10 -9 119.99 11.3
 11 10 9 6.8 8.1
 11 10 9 26.8 8.1
 11 10 9 4.9 6
 11 10 9 25.8 8.2
 11 10 9 16 8.3
 -11 -10 -9 11.4 8.2
 -11 -10 -9 23.1 5.1
 -11 -10 -9 7.8 8.9
 -11 -10 -9 16.9 6.5
 12 10 9 -10 4.3
 12 10 9 1.6 6.6
 12 10 9 3.6 5.9
 12 10 9 10.3 8.9
 -12 -10 -9 5.2 6.8
 -12 -10 -9 9.1 8.7
 -12 -10 -9 14.8 5.2
 -6 11 10 0.9 5.1
 -6 11 10 7.9 6.1
 -6 11 10 5.3 5.9
 -6 11 10 -2 5.3
 6 -11 -10 9.9 8
 6 -11 -10 7.6 10.6
 6 -11 -10 5.5 6.8
 6 -11 -10 2.8 7.1
 -5 11 10 97.79 15.4
 -5 11 10 77.59 12.2
 -5 11 10 75.69 11.5
 5 -11 -10 70.09 14.4
 5 -11 -10 56.79 15.8
 5 -11 -10 71.99 13.3
 5 -11 -10 74.99 13.3
 5 -11 -10 63.29 12.5
 -4 11 10 17.6 7.4
 -4 11 10 12.9 7
 -4 11 10 7.6 5.5
 -4 11 10 21.8 7.3
 4 -11 -10 8.3 7.8
 4 -11 -10 7.2 6.5
 4 -11 -10 10.3 7.4
 4 -11 -10 22.5 11.9
 4 -11 -10 12.6 8.1
 4 -11 -10 4.3 6.5
 -3 11 10 8 6.4
 -3 11 10 9.3 5.3
 -3 11 10 2 6
 -3 11 10 11 6.1
 -3 11 10 7 5.1
 3 -11 -10 4 8.2
 3 -11 -10 2.2 6.5
 3 -11 -10 -1 6.3
 3 -11 -10 -2.7 5.2
 3 -11 -10 2.1 7.2
 -2 11 10 131.19 16.5
 -2 11 10 99.49 14
 -2 11 10 79.99 11.8
 -2 11 10 100.09 11.9
 -2 11 10 93.09 13.7
 2 -11 -10 90.09 16.2
 2 -11 -10 113.69 14.8
 2 -11 -10 129.99 15.1
 2 -11 -10 84.29 16.7
 2 -11 -10 101.69 18.4
 2 -11 -10 102.79 15.2
 2 -11 -10 92.99 14.3
 -1 11 10 29.9 6.3
 -1 11 10 37.1 9.2
 -1 11 10 18.4 6.1
 -1 11 10 27.8 8.7
 -1 11 10 20.2 6.6
 1 -11 -10 38.3 9.8
 1 -11 -10 24.4 8.5
 1 -11 -10 36.4 11.9
 1 -11 -10 27.5 10.2
 1 -11 -10 35.2 9.3
 1 -11 -10 44.7 8.8
 1 -11 -10 26.4 11.2
 1 -11 -10 17 7.8
 0 11 10 3.9 4
 0 11 10 10.7 4.3
 0 11 10 15 6.1
 0 11 10 12.3 5.3
 0 11 10 7.5 4.5
 0 11 10 21.9 7.8
 0 -11 -10 18.6 8.1
 0 -11 -10 16.9 7.4
 0 -11 -10 11.7 8.5
 0 -11 -10 16.6 5.8
 0 -11 -10 16.8 8.9
 0 -11 -10 17 7.7
 0 -11 -10 15.2 8.2
 1 11 10 0.6 4.5
 1 11 10 4.8 4
 1 11 10 8.9 6.1
 1 11 10 8.4 4.5
 1 11 10 3 2.8
 -1 -11 -10 -1.1 6.2
 -1 -11 -10 6.3 6.3
 -1 -11 -10 6.4 4.6
 -1 -11 -10 1.7 6
 -1 -11 -10 23.5 8.6
 -1 -11 -10 -3.8 6
 -1 -11 -10 6.3 7.3
 2 11 10 -1 3
 2 11 10 -4 3.8
 2 11 10 3.2 2.7
 2 11 10 3.5 5.5
 2 11 10 -4.6 3.1
 2 11 10 2.7 4.4
 2 11 10 2 4.9
 -2 -11 -10 -5.8 5.3
 -2 -11 -10 -2.6 6.2
 -2 -11 -10 1.7 4.6
 -2 -11 -10 1.5 6.3
 -2 -11 -10 1.9 3.9
 -2 -11 -10 -1.3 5.5
 -2 -11 -10 -8.4 5.3
 3 11 10 0.9 4.1
 3 11 10 -0.9 4.1
 3 11 10 -1.9 3.1
 3 11 10 -3.2 3.2
 3 11 10 -4.8 4.3
 3 11 10 -0.3 3.8
 -3 -11 -10 6.6 7.1
 -3 -11 -10 -1.9 7.1
 -3 -11 -10 9.5 6.9
 -3 -11 -10 -7.6 5
 -3 -11 -10 -0.5 4.8
 4 11 10 4.4 4.9
 4 11 10 -2.7 3.9
 4 11 10 13.3 6.8
 4 11 10 5.2 5.3
 4 11 10 -1.9 3.6
 4 11 10 -2.8 4
 -4 -11 -10 4.2 6.9
 -4 -11 -10 0.8 6.2
 -4 -11 -10 12.4 6
 -4 -11 -10 -5.8 5.7
 5 11 10 112.69 15.6
 5 11 10 127.39 12.5
 5 11 10 134.29 14.6
 5 11 10 119.09 17.1
 5 11 10 133.59 17.6
 -5 -11 -10 151.38 12.3
 -5 -11 -10 104.89 15.9
 -5 -11 -10 111.89 17.8
 -5 -11 -10 176.78 15.4
 -5 -11 -10 151.68 17
 6 11 10 34.7 9.2
 6 11 10 17.1 7.3
 6 11 10 22.1 7.6
 6 11 10 36.6 9.7
 6 11 10 24.1 6.1
 -6 -11 -10 16.5 9.4
 -6 -11 -10 19.5 5.4
 -6 -11 -10 11.6 7.1
 -6 -11 -10 19.8 6.9
 -6 -11 -10 19.4 8.2
 7 11 10 -2.4 4
 7 11 10 -0.6 3.8
 7 11 10 2.6 5.4
 7 11 10 5.5 6.5
 7 11 10 5.9 5.3
 -7 -11 -10 5 7.6
 -7 -11 -10 0.2 3.6
 -7 -11 -10 -3.4 4.2
 -7 -11 -10 -1.4 4.1
 -7 -11 -10 -2.3 5.6
 8 11 10 25.5 8.5
 8 11 10 9.1 6.2
 8 11 10 11.4 6.4
 8 11 10 11.6 8.1
 -8 -11 -10 17.3 5.6
 -8 -11 -10 17.5 6
 -8 -11 -10 22.5 8.9
 -8 -11 -10 24 7.3
 -8 -11 -10 18.9 8.7
 9 11 10 2.3 5.3
 9 11 10 3.7 6.3
 9 11 10 4.2 6.5
 9 11 10 -0.7 4.9
 -9 -11 -10 5.8 4.7
 -9 -11 -10 0.1 7.1
 -9 -11 -10 -2 6.7
 -9 -11 -10 7.8 5.5
 -9 -11 -10 -2.1 4.8
 10 11 10 36.5 9.2
 10 11 10 15.7 8.5
 10 11 10 12.4 7.3
 10 11 10 14 7.3
 10 11 10 13.8 9.7
 -10 -11 -10 3.1 7.4
 -10 -11 -10 6 5.7
 -10 -11 -10 11.6 10
 -10 -11 -10 16.5 5
 11 11 10 4.2 6.2
 11 11 10 5.7 6.9
 11 11 10 5.4 9.2
 11 11 10 -5.4 4.2
 11 11 10 1.4 6
 -11 -11 -10 5.2 3.9
 -11 -11 -10 -0.1 8.1
 -11 -11 -10 13.6 9.6
 -11 -11 -10 3.7 4.9
 -4 12 11 5.6 6.2
 -4 12 11 -8.2 5.7
 -4 12 11 -0.5 5
 -4 12 11 1.4 5.2
 4 -12 -11 3.7 7.8
 4 -12 -11 -1.3 5.2
 4 -12 -11 -6.4 8.9
 4 -12 -11 -1.5 6.3
 4 -12 -11 -6.8 7.6
 -3 12 11 -0.4 4.6
 -3 12 11 -9.3 3.6
 -3 12 11 2.2 5.9
 -3 12 11 4.3 5.6
 3 -12 -11 -2.5 5.9
 3 -12 -11 3 6.8
 3 -12 -11 -2 9.3
 3 -12 -11 2.5 5.9
 -2 12 11 -2.4 4.4
 -2 12 11 6.6 6.4
 -2 12 11 -6.7 5.8
 -2 12 11 -3.3 4
 2 -12 -11 2.3 5
 2 -12 -11 10.2 9.7
 2 -12 -11 2 6.1
 2 -12 -11 11 8.1
 -1 12 11 62.69 11.5
 -1 12 11 77.19 9.9
 -1 12 11 80.09 13.8
 -1 12 11 98.39 15.6
 1 -12 -11 90.69 15.5
 1 -12 -11 52.39 14.3
 1 -12 -11 95.79 13.7
 1 -12 -11 77.19 15.3
 1 -12 -11 63.69 15.2
 1 -12 -11 71.09 13.3
 0 12 11 1.2 4.7
 0 12 11 3.1 3.9
 0 12 11 5.8 5.2
 0 12 11 -1.5 5.6
 0 -12 -11 14.1 9.5
 0 -12 -11 12.6 7.8
 0 -12 -11 3.9 8.1
 0 -12 -11 7.2 7.4
 0 -12 -11 12.3 8.3
 0 -12 -11 5.4 5.8
 1 12 11 23.6 6.9
 1 12 11 15.5 7.2
 1 12 11 13.3 6.9
 -1 -12 -11 14.9 9
 -1 -12 -11 21.1 8.8
 -1 -12 -11 16.4 8.8
 -1 -12 -11 15.1 6.3
 -1 -12 -11 9.2 8.1
 -1 -12 -11 20.2 8.3
 2 12 11 44.9 11
 2 12 11 19.8 7.4
 2 12 11 45.1 9.8
 2 12 11 69.89 11.3
 2 12 11 32.5 8.4
 -2 -12 -11 29 9.9
 -2 -12 -11 45.9 11.7
 -2 -12 -11 35.8 9
 -2 -12 -11 30.5 10.6
 -2 -12 -11 25.1 9.4
 3 12 11 5 5.7
 3 12 11 18.1 6.6
 3 12 11 11.8 6.7
 3 12 11 4.3 5.2
 3 12 11 12.9 7.3
 3 12 11 8.9 6.4
 -3 -12 -11 14.4 9.1
 -3 -12 -11 14.4 8.6
 -3 -12 -11 10.1 7.9
 -3 -12 -11 13.9 9.1
 4 12 11 6.5 5.9
 4 12 11 3.7 4.7
 4 12 11 0 5.1
 4 12 11 6.2 5.6
 -4 -12 -11 -1.7 6.4
 -4 -12 -11 -1.6 5.9
 -4 -12 -11 10.9 8.8
 -4 -12 -11 6.7 5.8
 5 12 11 34.3 8.9
 5 12 11 29.6 9.6
 5 12 11 35.4 9.4
 5 12 11 31.7 10.5
 -5 -12 -11 31.2 10.1
 -5 -12 -11 31 8.8
 -5 -12 -11 24.9 10.1
 -5 -12 -11 5.8 8.4
 6 12 11 10.3 6.8
 6 12 11 14.9 7.1
 6 12 11 26.3 9.1
 6 12 11 13.1 7.1
 -6 -12 -11 17.2 7.4
 -6 -12 -11 25.6 7.2
 -6 -12 -11 22.4 10.1
 -6 -12 -11 12.2 8.5
 7 12 11 142.69 20.4
 7 12 11 161.78 19.2
 7 12 11 115.09 18.3
 7 12 11 138.39 18.2
 -7 -12 -11 137.99 21.5
 -7 -12 -11 132.49 17.7
 -7 -12 -11 164.58 15.8
 -7 -12 -11 180.08 19.9
 8 12 11 4.9 5.5
 8 12 11 -3.3 5.9
 8 12 11 -1 5.5
 8 12 11 -3.4 4.6
 -8 -12 -11 3 5.9
 -8 -12 -11 2.4 4.9
 -8 -12 -11 -3 7.1
 -8 -12 -11 0.7 7.2
 9 12 11 36 9.5
 9 12 11 15.4 8.8
 9 12 11 18.8 9.1
 9 12 11 24.2 9.3
 -9 -12 -11 35.8 8.4
 -9 -12 -11 17.8 6.1
 -9 -12 -11 37.3 13.3
 -9 -12 -11 17.8 10.3
 10 12 11 29.6 9.1
 10 12 11 30.4 10.9
 10 12 11 23.7 10.3
 10 12 11 27.7 10
 -10 -12 -11 59.69 9.6
 -10 -12 -11 37.1 13.1
 -10 -12 -11 28.2 11.2
 -10 -12 -11 24.8 7.6
 -2 13 12 24.6 9.3
 -2 13 12 -3.4 7.4
 -2 13 12 4.5 5.5
 2 -13 -12 6.3 11.3
 2 -13 -12 29 9.7
 2 -13 -12 14.8 7.4
 2 -13 -12 4.5 8.1
 -1 13 12 -3 4.3
 -1 13 12 -3.3 5.8
 -1 13 12 3.5 6.7
 1 -13 -12 1.9 5.4
 1 -13 -12 -2.4 5.9
 1 -13 -12 9.7 10.2
 1 -13 -12 -5.1 6.9
 1 -13 -12 -6.9 5.3
 0 13 12 41.8 10.7
 0 13 12 37.7 10.5
 0 13 12 37.5 9.5
 0 -13 -12 27.8 8
 0 -13 -12 31.9 11.3
 0 -13 -12 28.3 16.8
 0 -13 -12 36.5 12.2
 0 -13 -12 30.3 10.9
 0 -13 -12 7.2 10.2
 1 13 12 59.49 12.9
 1 13 12 32.3 9.2
 1 13 12 31.9 8.6
 1 13 12 33.5 8.5
 1 13 12 46.9 11
 -1 -13 -12 31.6 10.7
 -1 -13 -12 28 10.8
 -1 -13 -12 37 13.6
 -1 -13 -12 40.6 11.3
 -1 -13 -12 43.6 12.6
 2 13 12 31.9 8.7
 2 13 12 20.1 7.6
 2 13 12 19.1 7.4
 2 13 12 26.6 7.8
 2 13 12 11.7 8
 -2 -13 -12 41.9 12.5
 -2 -13 -12 14 9.5
 -2 -13 -12 8.6 9.3
 -2 -13 -12 29 9.2
 3 13 12 13.3 8
 3 13 12 0.6 5.5
 3 13 12 5.9 6
 3 13 12 7 6.6
 -3 -13 -12 0.8 8.4
 -3 -13 -12 7.4 7.3
 -3 -13 -12 8.3 9.3
 -3 -13 -12 6 8.2
 4 13 12 63.39 13.4
 4 13 12 64.39 12.5
 4 13 12 39.9 11
 4 13 12 33.6 9.4
 -4 -13 -12 48.2 12
 -4 -13 -12 28.9 11.5
 -4 -13 -12 54.99 11.6
 -4 -13 -12 47 12.7
 5 13 12 13.1 7.7
 5 13 12 8.6 7.3
 5 13 12 0.5 5.6
 5 13 12 5.5 7.5
 -5 -13 -12 1.4 5.7
 -5 -13 -12 8.1 9
 -5 -13 -12 7.3 8.7
 -5 -13 -12 -0.6 7.1
 6 13 12 207.68 23.3
 6 13 12 213.38 26.1
 6 13 12 234.98 22.9
 6 13 12 229.78 22.6
 -6 -13 -12 234.68 22.5
 -6 -13 -12 266.67 25.6
 -6 -13 -12 247.98 27.3
 -6 -13 -12 244.98 24.1
 7 13 12 23.2 9.3
 7 13 12 43.4 11
 7 13 12 10.5 8.3
 7 13 12 41.7 10.7
 -7 -13 -12 39.1 12
 -7 -13 -12 20.6 10.5
 -7 -13 -12 42.1 10.5
 -7 -13 -12 38.6 9.5
 8 13 12 20.4 8.6
 8 13 12 17.7 8.9
 8 13 12 31.8 10.4
 8 13 12 22.8 9.6
 -8 -13 -12 9.8 9.1
 -8 -13 -12 21.8 7.5
 -8 -13 -12 15.7 9.6
 -8 -13 -12 17.9 7.4
 1 14 13 47.7 12.1
 2 14 13 3.8 6.3
 2 14 13 4.9 7
 2 14 13 17 8.2
 2 14 13 7.6 6.7
 -2 -14 -13 13.1 10.9
 -2 -14 -13 24.4 10.7
 -2 -14 -13 5.5 8.4
 -2 -14 -13 16.1 8.2
 3 14 13 30.7 9.2
 3 14 13 12.9 7.5
 3 14 13 21.6 10
 3 14 13 24 9.3
 -3 -14 -13 20.8 8.6
 -3 -14 -13 18.2 10.2
 -3 -14 -13 7.6 9.7
 -3 -14 -13 22.2 10.8
 4 14 13 9.8 7.4
 4 14 13 7.3 8.5
 4 14 13 7.6 7.3
 4 14 13 1.3 6.1
 -4 -14 -13 16.3 9.7
 -4 -14 -13 15.7 7.8
 -4 -14 -13 3.8 9.4
 -4 -14 -13 -4.9 8.4
 5 14 13 13.7 7.3
 5 14 13 7.6 7
 5 14 13 3.2 6.7
 5 14 13 6.2 7.5
 -5 -14 -13 8.6 7.4
 -5 -14 -13 -5.6 7.5
 -5 -14 -13 -6.5 7.5
 -5 -14 -13 -0.1 6.3
 -7 -12 -14 3.4 7.9
 -7 -12 -14 11 5.8
 -7 -12 -14 -1.9 7.5
 -7 -12 -14 3.1 5.7
 7 12 14 3.4 6.5
 7 12 14 0.4 6.1
 7 12 14 -2.3 4.9
 7 12 14 4.3 7.2
 -6 -12 -14 45 13.3
 -6 -12 -14 65.19 12.7
 -6 -12 -14 25.1 10.4
 -6 -12 -14 38.5 10.9
 6 12 14 70.89 14.9
 6 12 14 94.79 15.7
 6 12 14 60.99 13.4
 6 12 14 68.59 13.1
 -5 -12 -14 5.7 7.1
 -5 -12 -14 -1.3 8.5
 -5 -12 -14 8.2 8.1
 -5 -12 -14 -3.6 7.3
 5 12 14 2.3 6.4
 5 12 14 8.2 7.4
 5 12 14 -3.9 5.3
 5 12 14 -5.6 4.4
 -4 -12 -14 17.2 9.1
 -4 -12 -14 6.7 8.5
 -4 -12 -14 27.7 10.8
 -4 -12 -14 -4.1 7.2
 4 12 14 11.6 6.7
 4 12 14 1.2 5.5
 4 12 14 7.2 6.2
 4 12 14 0.8 5.4
 -3 -12 -14 2.3 8.8
 -3 -12 -14 2.2 8.2
 -3 -12 -14 -0.1 5.9
 -3 -12 -14 -5.5 6.7
 3 12 14 -4.7 4.2
 3 12 14 -6.2 5.3
 3 12 14 4.4 6.4
 3 12 14 -8 5.4
 -2 -12 -14 19.1 10.3
 -2 -12 -14 32 11.3
 -2 -12 -14 3.9 8.7
 -2 -12 -14 17.7 8.7
 2 12 14 9.8 7.5
 2 12 14 27 10.1
 2 12 14 23.3 8.9
 2 12 14 29.7 8.6
 2 12 14 14.3 7.3
 -1 -12 -14 6 5.5
 -1 -12 -14 8.1 9
 -1 -12 -14 -3.9 7
 -1 -12 -14 -11.8 6.4
 -1 -12 -14 4.5 5.7
 1 12 14 4.2 5.4
 1 12 14 -0.8 5.5
 1 12 14 13.9 7.4
 1 12 14 -1.6 5.7
 0 -12 -14 11.1 7.1
 0 -12 -14 -4.9 4
 0 -12 -14 -7.5 6
 0 -12 -14 -3.7 7.8
 0 12 14 -3.6 4.1
 0 12 14 0.6 5.5
 0 12 14 5.7 7
 0 12 14 -1.3 4.9
 1 -12 -14 11.1 8.8
 1 -12 -14 20.3 8.4
 1 -12 -14 10.5 6.7
 1 -12 -14 9.5 8.4
 -1 12 14 26.4 10.1
 -1 12 14 3.5 5.3
 -1 12 14 7.8 8.5
 2 -12 -14 21.5 9.7
 2 -12 -14 -0.8 8.1
 2 -12 -14 9.1 9.3
 2 -12 -14 -1.2 5.6
 -2 12 14 9.8 7.3
 -2 12 14 -6.1 6.4
 -2 12 14 9 7.2
 -9 -11 -13 36.9 12.1
 -9 -11 -13 39.4 9.4
 -9 -11 -13 38.9 9.5
 -9 -11 -13 34.5 11.2
 9 11 13 34.1 12.4
 9 11 13 26.6 9.7
 9 11 13 23.3 8.8
 9 11 13 44 11.9
 -8 -11 -13 -1.7 6.7
 -8 -11 -13 3.6 7.3
 -8 -11 -13 10.1 7
 -8 -11 -13 11.6 6.8
 8 11 13 3.2 6
 8 11 13 8.6 6.8
 8 11 13 4.5 6.9
 8 11 13 5.3 6.7
 -7 -11 -13 181.58 21.8
 -7 -11 -13 214.08 19.2
 -7 -11 -13 197.68 24.5
 -7 -11 -13 203.18 22.6
 7 11 13 130.69 21
 7 11 13 177.98 18.4
 7 11 13 162.08 21.8
 7 11 13 185.68 23.5
 -6 -11 -13 3.9 7.1
 -6 -11 -13 -1 4.9
 -6 -11 -13 -0.8 7.5
 -6 -11 -13 3.7 7.6
 6 11 13 9.2 6.9
 6 11 13 11.9 7.5
 6 11 13 0.5 5.9
 6 11 13 5.6 6.5
 -5 -11 -13 10.3 7.8
 -5 -11 -13 25 10.1
 -5 -11 -13 6 7.9
 -5 -11 -13 11 5.8
 5 11 13 11.7 6.9
 5 11 13 7.9 6.8
 5 11 13 5.2 6.7
 5 11 13 13.9 7.4
 -4 -11 -13 7.3 8.3
 -4 -11 -13 3.4 8
 -4 -11 -13 8.1 7.8
 -4 -11 -13 9.5 6.5
 4 11 13 8.5 5.4
 4 11 13 9 6.8
 4 11 13 -3.1 5.2
 4 11 13 13.4 7.4
 -3 -11 -13 34.6 11.1
 -3 -11 -13 31.4 10.6
 -3 -11 -13 50.69 11.8
 -3 -11 -13 45.9 12.2
 3 11 13 32.6 9.4
 3 11 13 25.8 9.3
 3 11 13 42.5 9.7
 3 11 13 34.3 9.2
 -2 -11 -13 10.6 8.3
 -2 -11 -13 -2 7.1
 -2 -11 -13 -0.6 6.5
 -2 -11 -13 4.5 5.9
 -2 -11 -13 1.6 4.4
 2 11 13 2 5
 2 11 13 0.9 5.1
 2 11 13 4.4 6.4
 2 11 13 -1.7 4.1
 -1 -11 -13 3 7
 -1 -11 -13 5.8 6.6
 -1 -11 -13 0.6 5
 -1 -11 -13 8.1 7.8
 -1 -11 -13 7.5 7.4
 1 11 13 1.4 5.5
 1 11 13 8.8 5.8
 1 11 13 7.4 6.5
 1 11 13 11.1 7.5
 0 -11 -13 46.3 10.7
 0 -11 -13 55.19 12.1
 0 -11 -13 56.49 12.3
 0 -11 -13 58.89 15.4
 0 -11 -13 70.29 14.6
 0 -11 -13 59.79 11.4
 0 11 13 50.99 11
 0 11 13 42.9 9.9
 0 11 13 48.1 10.4
 1 -11 -13 47.5 12.3
 1 -11 -13 47.7 11.9
 1 -11 -13 53.29 13.1
 1 -11 -13 49.2 11.1
 1 -11 -13 43.3 11.1
 -1 11 13 49.8 11.7
 -1 11 13 43.6 9.6
 -1 11 13 61.19 12.6
 2 -11 -13 -7.2 6.1
 2 -11 -13 -7.7 5.6
 2 -11 -13 -8.3 8.5
 2 -11 -13 9.9 6.8
 2 -11 -13 -2.4 5.9
 -2 11 13 -6.3 4.5
 -2 11 13 -5.2 6.3
 -2 11 13 -1.9 4.3
 3 -11 -13 1.4 6.2
 3 -11 -13 -8.5 6.7
 3 -11 -13 -0.3 6.1
 3 -11 -13 7.6 7.8
 -3 11 13 4.1 6.8
 -3 11 13 6.8 5.6
 -3 11 13 2.5 5
 -3 11 13 -3.3 5.7
 4 -11 -13 350.36 29.2
 4 -11 -13 292.87 31.3
 4 -11 -13 353.36 30.7
 -4 11 13 292.67 25.9
 -4 11 13 315.37 28.7
 -4 11 13 303.27 27.6
 -4 11 13 327.77 27.3
 -10 -10 -12 70.99 12.1
 -10 -10 -12 40.2 12.3
 -10 -10 -12 79.39 11.4
 -10 -10 -12 44.2 13.5
 10 10 12 44.9 11.7
 10 10 12 73.69 15.2
 10 10 12 40.5 11.6
 10 10 12 59.29 14
 -9 -10 -12 25.4 7.1
 -9 -10 -12 9.8 9.4
 -9 -10 -12 18 6.1
 -9 -10 -12 8.5 7.8
 9 10 12 19.3 9.2
 9 10 12 18.8 9
 9 10 12 20.5 9.7
 9 10 12 14.4 7.9
 -8 -10 -12 0.5 5.2
 -8 -10 -12 6.6 8
 -8 -10 -12 2.9 5.9
 -8 -10 -12 1 6.6
 8 10 12 16.5 9.5
 8 10 12 3.2 6
 8 10 12 0.6 5.8
 8 10 12 14.9 6.5
 8 10 12 -3.6 4.8
 -7 -10 -12 24.3 10.7
 -7 -10 -12 23.4 7.5
 -7 -10 -12 12.5 7.6
 -7 -10 -12 4 6.9
 7 10 12 23.1 9.7
 7 10 12 26.2 8.1
 7 10 12 15.1 7.9
 7 10 12 10.1 6.8
 7 10 12 7.1 5.8
 -6 -10 -12 72.69 12.2
 -6 -10 -12 75.49 13.1
 -6 -10 -12 72.69 14.9
 -6 -10 -12 58.69 12.6
 6 10 12 47.8 11.7
 6 10 12 83.59 12.9
 6 10 12 50.89 12.7
 6 10 12 57.29 11.7
 -5 -10 -12 244.88 18.4
 -5 -10 -12 252.27 21.3
 -5 -10 -12 241.38 23.1
 -5 -10 -12 246.38 22.5
 -5 -10 -12 198.58 24.1
 5 10 12 237.08 21.4
 5 10 12 211.68 21.5
 5 10 12 211.68 20.1
 5 10 12 229.68 22.9
 -4 -10 -12 16.5 8.5
 -4 -10 -12 26.8 10.1
 -4 -10 -12 17.5 7
 -4 -10 -12 16.9 5.7
 -4 -10 -12 21.7 8.8
 4 10 12 14.6 6.7
 4 10 12 13.5 6.9
 4 10 12 28.8 8.3
 4 10 12 16.2 6.4
 4 10 12 21 6.7
 -3 -10 -12 39.7 10.2
 -3 -10 -12 46.1 10.3
 -3 -10 -12 46.1 11
 -3 -10 -12 21.6 13.3
 -3 -10 -12 34.9 7.1
 -3 -10 -12 71.79 13.1
 3 10 12 60.79 10.8
 3 10 12 28.8 7.8
 3 10 12 61.19 10.8
 3 10 12 32.7 8.8
 3 10 12 40.3 9.5
 -2 -10 -12 36.1 10.2
 -2 -10 -12 34.2 7.2
 -2 -10 -12 29.1 9.2
 -2 -10 -12 26.5 10.2
 -2 -10 -12 40 9.2
 -2 -10 -12 28.5 9.7
 2 10 12 38.9 10.3
 2 10 12 23.8 7.6
 2 10 12 41.3 9
 2 10 12 32.9 8.4
 -1 -10 -12 277.67 29
 -1 -10 -12 337.97 27.1
 -1 -10 -12 281.97 24.8
 -1 -10 -12 222.28 23.5
 -1 -10 -12 307.07 32.6
 -1 -10 -12 311.87 23
 -1 -10 -12 298.47 24.9
 1 10 12 227.18 22.1
 1 10 12 290.07 25.3
 1 10 12 328.87 25
 1 10 12 240.38 22.3
 0 -10 -12 21.2 7
 0 -10 -12 7.1 7.3
 0 -10 -12 34 10.4
 0 -10 -12 11.2 8.7
 0 -10 -12 6 7.3
 0 -10 -12 16 8.4
 0 -10 -12 13 7.2
 0 10 12 1.8 6.3
 0 10 12 19.4 7.4
 0 10 12 20.9 6.7
 1 -10 -12 29.5 10.5
 1 -10 -12 20.8 8.6
 1 -10 -12 24.3 9.6
 1 -10 -12 19.4 6.6
 1 -10 -12 4.7 7
 1 -10 -12 20.1 8
 1 -10 -12 21.7 8.6
 -1 10 12 14.7 6.9
 -1 10 12 17.1 6.7
 -1 10 12 17 4.7
 -1 10 12 4.4 5.7
 -1 10 12 9.9 5.4
 2 -10 -12 68.29 14.5
 2 -10 -12 77.49 14.3
 2 -10 -12 80.59 13.5
 2 -10 -12 78.09 12.5
 2 -10 -12 84.99 14.2
 2 -10 -12 48 13.1
 -2 10 12 75.19 9.4
 -2 10 12 72.69 11.9
 -2 10 12 55.09 10.1
 -2 10 12 53.29 11.7
 -2 10 12 64.59 12.5
 3 -10 -12 41 9.2
 3 -10 -12 38.5 10.5
 3 -10 -12 16.9 10.9
 3 -10 -12 36.4 10.8
 3 -10 -12 25.2 8.6
 -3 10 12 20.9 9.7
 -3 10 12 39.6 7.6
 -3 10 12 32.1 8.9
 -3 10 12 38.4 8.3
 -3 10 12 28 7.4
 -3 10 12 30.2 9.4
 4 -10 -12 24.4 11.2
 4 -10 -12 23.2 10.1
 4 -10 -12 55.89 11.5
 -4 10 12 43.9 8.4
 -4 10 12 29.6 9.3
 -4 10 12 53.29 10.6
 -4 10 12 51.49 10.6
 -4 10 12 27.1 7.7
 5 -10 -12 59.29 13.1
 5 -10 -12 73.29 16.7
 5 -10 -12 63.89 13.9
 5 -10 -12 91.79 15.9
 -5 10 12 86.19 13.1
 -5 10 12 70.79 13.9
 -5 10 12 95.19 12.8
 6 -10 -12 213.48 25.1
 6 -10 -12 164.78 22.1
 6 -10 -12 245.18 27.2
 6 -10 -12 159.68 25.1
 -6 10 12 186.68 18.1
 -6 10 12 158.98 21
 -6 10 12 204.68 19.5
 -11 -9 -11 213.18 16.3
 -11 -9 -11 143.59 23.2
 -11 -9 -11 195.08 23.3
 -11 -9 -11 187.98 17.3
 11 9 11 173.78 22.1
 11 9 11 197.38 24.3
 11 9 11 149.99 22.5
 11 9 11 129.59 21.1
 -10 -9 -11 0.3 4.9
 -10 -9 -11 9.2 8.3
 -10 -9 -11 12.1 4.5
 -10 -9 -11 -1.9 6.2
 10 9 11 2.3 5.7
 10 9 11 2.9 8
 10 9 11 -2.8 4.9
 10 9 11 1.1 6.8
 -9 -9 -11 36.1 11
 -9 -9 -11 62.79 9.4
 -9 -9 -11 63.69 14.8
 -9 -9 -11 61.79 10.6
 9 9 11 35.1 10.5
 9 9 11 46.1 11.4
 9 9 11 41.1 10.1
 9 9 11 53.89 12.6
 -8 -9 -11 19.5 7.1
 -8 -9 -11 22.3 6.4
 -8 -9 -11 14.2 7.8
 -8 -9 -11 17.3 5.9
 -8 -9 -11 26.1 9.2
 8 9 11 24.1 7.7
 8 9 11 18.6 8.1
 8 9 11 18.4 6.5
 8 9 11 14.5 7.1
 8 9 11 13.1 7.2
 -7 -9 -11 8.8 7.2
 -7 -9 -11 26.7 5.9
 -7 -9 -11 21.4 9.3
 -7 -9 -11 18 5.9
 -7 -9 -11 28 8
 -7 -9 -11 44.3 8.9
 7 9 11 40.3 9.8
 7 9 11 40.8 10.3
 7 9 11 18.4 8.2
 7 9 11 20.4 7.5
 7 9 11 23.7 6.8
 -6 -9 -11 72.19 10.8
 -6 -9 -11 89.09 13.2
 -6 -9 -11 76.79 13
 -6 -9 -11 63.89 14.1
 -6 -9 -11 62.69 8.8
 -6 -9 -11 99.09 9.4
 6 9 11 110.19 13.3
 6 9 11 89.09 14.4
 6 9 11 80.49 13.2
 6 9 11 64.59 11.6
 6 9 11 77.69 13.3
 -5 -9 -11 113.49 15.1
 -5 -9 -11 115.99 18.2
 -5 -9 -11 145.79 11.9
 -5 -9 -11 111.29 22.4
 -5 -9 -11 135.09 12.2
 -5 -9 -11 140.79 16.7
 -5 -9 -11 130.79 16.9
 5 9 11 110.69 15.9
 5 9 11 154.08 14.2
 5 9 11 135.49 13.5
 5 9 11 102.99 16
 5 9 11 128.29 16.6
 -4 -9 -11 29 11.1
 -4 -9 -11 29.1 9.4
 -4 -9 -11 36.7 7.9
 -4 -9 -11 25.5 8.6
 -4 -9 -11 45.1 8.8
 -4 -9 -11 38.2 6.5
 -4 -9 -11 31.1 9.1
 4 9 11 31 8.4
 4 9 11 47.1 8.3
 4 9 11 37.4 7.5
 4 9 11 53.89 9.5
 4 9 11 37.5 9.9
 4 9 11 45 9.4
 -3 -9 -11 -1.2 2.9
 -3 -9 -11 8.4 7.4
 -3 -9 -11 3.4 6
 -3 -9 -11 5.3 4.2
 -3 -9 -11 3.6 6.5
 -3 -9 -11 3.5 4.9
 -3 -9 -11 -9.1 5.3
 3 9 11 -6.6 4.2
 3 9 11 5.2 5.1
 3 9 11 5.7 4.4
 3 9 11 -4.9 3.6
 3 9 11 -3 3.6
 3 9 11 -1.7 3.5
 -2 -9 -11 21.7 9.7
 -2 -9 -11 43.2 7.7
 -2 -9 -11 25.9 7.9
 -2 -9 -11 30.6 9
 -2 -9 -11 27.4 7.9
 -2 -9 -11 39.8 10
 2 9 11 42.4 9
 2 9 11 31.2 7.6
 2 9 11 42 8.5
 2 9 11 49.6 10.5
 2 9 11 39.2 7.1
 -1 -9 -11 13.3 6.2
 -1 -9 -11 14.1 6.8
 -1 -9 -11 13.8 7.3
 -1 -9 -11 4.3 4.4
 -1 -9 -11 15.3 6.4
 -1 -9 -11 6.3 5.7
 -1 -9 -11 -0.5 6.9
 1 9 11 6 5.3
 1 9 11 8.5 2.7
 1 9 11 7.4 4.6
 1 9 11 8 3.1
 1 9 11 1.6 4
 1 9 11 7 5.2
 0 -9 -11 30.1 8.5
 0 -9 -11 8.1 6.8
 0 -9 -11 18.6 6.9
 0 -9 -11 22.1 8.9
 0 -9 -11 15.4 8.7
 0 -9 -11 18.8 6.1
 0 -9 -11 19.8 6.2
 0 -9 -11 15.2 6.8
 0 9 11 18.7 6.7
 0 9 11 30.5 8.3
 0 9 11 17 3.8
 0 9 11 18.6 4.9
 0 9 11 16 8.7
 0 9 11 17.4 5.9
 0 9 11 19.1 6.6
 0 9 11 16.8 8.6
 1 -9 -11 150.88 18.2
 1 -9 -11 127.59 13
 1 -9 -11 141.39 17
 1 -9 -11 120.79 16.7
 1 -9 -11 120.59 16.8
 1 -9 -11 110.79 13.7
 1 -9 -11 150.38 14.6
 1 -9 -11 115.79 14.3
 -1 9 11 146.79 14.3
 -1 9 11 114.09 15.5
 -1 9 11 97.49 18.3
 -1 9 11 137.99 12.9
 -1 9 11 118.19 15.1
 -1 9 11 115.09 12.4
 -1 9 11 132.09 10.7
 -1 9 11 117.69 11.7
 2 -9 -11 82.59 14.9
 2 -9 -11 82.29 12.4
 2 -9 -11 54.09 11
 2 -9 -11 63.59 13.3
 2 -9 -11 89.49 13.1
 2 -9 -11 89.69 15
 2 -9 -11 117.99 15.2
 2 -9 -11 97.19 12.9
 -2 9 11 99.29 13.3
 -2 9 11 105.89 15.2
 -2 9 11 87.89 12.3
 -2 9 11 90.29 10
 -2 9 11 85.19 11.2
 -2 9 11 75.19 10.7
 -2 9 11 51.29 13
 -2 9 11 114.79 14.4
 3 -9 -11 1.2 5.5
 3 -9 -11 1.4 4.7
 3 -9 -11 3.3 5.5
 3 -9 -11 3 5.2
 3 -9 -11 5.8 7.8
 3 -9 -11 -4.1 5.3
 3 -9 -11 -1.2 4.5
 -3 9 11 7.8 4.2
 -3 9 11 4.1 4.7
 -3 9 11 4.3 5.4
 -3 9 11 6.5 5.6
 -3 9 11 0.7 4.3
 -3 9 11 4.9 4.8
 -3 9 11 5.1 5.2
 4 -9 -11 83.59 13.8
 4 -9 -11 65.09 10.9
 4 -9 -11 40.5 12.5
 4 -9 -11 77.29 12.9
 -4 9 11 89.59 13
 -4 9 11 42.5 9.4
 -4 9 11 70.19 11.3
 -4 9 11 78.49 10.4
 -4 9 11 64.69 10.2
 -4 9 11 73.09 13.3
 -4 9 11 56.39 10.1
 5 -9 -11 126.09 17.1
 5 -9 -11 90.09 17.7
 5 -9 -11 131.49 17.2
 5 -9 -11 114.39 16.4
 -5 9 11 106.19 16.7
 -5 9 11 130.19 15.3
 -5 9 11 118.49 14.7
 -5 9 11 112.09 14.3
 -5 9 11 106.09 13.6
 -5 9 11 104.69 15.9
 6 -9 -11 7.4 7.2
 6 -9 -11 5.2 8.7
 6 -9 -11 2.9 6.2
 6 -9 -11 3 6.5
 -6 9 11 9.8 7.1
 -6 9 11 0.7 5.2
 -6 9 11 -1.2 5.2
 -6 9 11 -1.4 5.4
 7 -9 -11 74.29 14.9
 7 -9 -11 69.89 16.7
 7 -9 -11 89.99 16.4
 7 -9 -11 74.59 14.9
 -7 9 11 78.99 14.4
 -7 9 11 68.79 12.8
 -7 9 11 73.89 12.4
 -7 9 11 102.19 16.2
 -12 -8 -10 0.3 4.8
 -12 -8 -10 -1.3 6.6
 -12 -8 -10 2.7 5.4
 12 8 10 4.5 6.9
 12 8 10 11.5 8.9
 12 8 10 9.6 6.7
 12 8 10 20.3 9.3
 -11 -8 -10 21 10
 -11 -8 -10 50.39 9.6
 -11 -8 -10 50.29 8.2
 -11 -8 -10 46.5 9.2
 11 8 10 26.9 8.8
 11 8 10 17 9.9
 11 8 10 35.1 11.8
 11 8 10 33.8 9.7
 -10 -8 -10 3.6 4.1
 -10 -8 -10 -0.2 4.3
 -10 -8 -10 -0.3 6.5
 -10 -8 -10 -1 4.4
 10 8 10 1.5 4.9
 10 8 10 -0.6 4.5
 10 8 10 0.4 5.7
 10 8 10 -6.5 5.6
 -9 -8 -10 -0.2 4.5
 -9 -8 -10 10.1 4.9
 -9 -8 -10 5.4 4.8
 -9 -8 -10 6.9 6.1
 9 8 10 4.9 6.4
 9 8 10 0.5 6.7
 9 8 10 -2.1 5.1
 9 8 10 11.2 5.4
 9 8 10 10.2 7.2
 -8 -8 -10 40.1 11.2
 -8 -8 -10 54.19 12.6
 -8 -8 -10 71.49 10.2
 -8 -8 -10 66.49 8.8
 -8 -8 -10 69.79 9.6
 -8 -8 -10 67.79 10.4
 8 8 10 69.09 13.8
 8 8 10 47.6 9.9
 8 8 10 77.79 13.9
 8 8 10 61.09 11.9
 8 8 10 53.39 9.2
 -7 -8 -10 13.7 6.5
 -7 -8 -10 19.6 5.5
 -7 -8 -10 16.6 6.3
 -7 -8 -10 12.6 8
 -7 -8 -10 13.9 7
 -7 -8 -10 13 4.8
 7 8 10 22.3 8.2
 7 8 10 11.6 7
 7 8 10 21.2 6.4
 7 8 10 24.4 7.3
 7 8 10 13.5 7
 -6 -8 -10 248.38 17.5
 -6 -8 -10 237.68 20.3
 -6 -8 -10 237.98 28.1
 -6 -8 -10 233.78 19.4
 -6 -8 -10 194.08 22.8
 -6 -8 -10 219.38 21.9
 -6 -8 -10 235.18 17.9
 6 8 10 232.08 18.6
 6 8 10 237.78 17.8
 6 8 10 238.98 21.7
 6 8 10 253.07 19.5
 6 8 10 199.08 19.8
 6 8 10 210.78 21.2
 6 8 10 264.77 23.2
 6 8 10 257.17 18.7
 -5 -8 -10 331.67 32.7
 -5 -8 -10 444.06 30.2
 -5 -8 -10 453.25 27.8
 -5 -8 -10 432.36 32.6
 -5 -8 -10 459.45 28.4
 -5 -8 -10 403.06 38.6
 -5 -8 -10 409.56 30.9
 5 8 10 386.36 28.6
 5 8 10 413.66 29.6
 5 8 10 395.86 31.7
 5 8 10 393.76 30.6
 5 8 10 425.66 32.5
 5 8 10 410.56 32.2
 5 8 10 423.26 29.4
 -4 -8 -10 276.87 19.1
 -4 -8 -10 298.77 21.9
 -4 -8 -10 214.28 23.2
 -4 -8 -10 292.37 22.7
 -4 -8 -10 284.47 23.3
 -4 -8 -10 285.57 18.8
 -4 -8 -10 231.08 27.5
 -4 -8 -10 264.97 19.2
 4 8 10 215.18 21.3
 4 8 10 273.87 20.8
 4 8 10 226.68 19.2
 4 8 10 280.47 23.4
 4 8 10 281.77 20.7
 4 8 10 246.88 22.6
 4 8 10 251.87 21.1
 -3 -8 -10 10.1 6.2
 -3 -8 -10 27.5 8.4
 -3 -8 -10 8.2 4.8
 -3 -8 -10 13.1 4.6
 -3 -8 -10 12.7 6.1
 -3 -8 -10 6.5 7
 -3 -8 -10 11.3 3.8
 3 8 10 17.1 6.8
 3 8 10 17.8 6.1
 3 8 10 22.5 6.3
 3 8 10 5.4 5.7
 3 8 10 21.5 6.6
 3 8 10 9.4 4.4
 3 8 10 16 4.8
 -2 -8 -10 18.1 7.2
 -2 -8 -10 16.9 8.6
 -2 -8 -10 19.7 7.1
 -2 -8 -10 16.4 4.9
 -2 -8 -10 25.3 6.9
 -2 -8 -10 24 6.3
 -2 -8 -10 18.1 4.9
 -2 -8 -10 18.2 7.1
 -2 -8 -10 15.1 5.9
 2 8 10 26.5 6.9
 2 8 10 20.7 6.9
 2 8 10 22.9 6.1
 2 8 10 20.7 5.5
 2 8 10 27.6 6.6
 2 8 10 22.3 5.1
 2 8 10 21.8 2.9
 -1 -8 -10 3.4 4.6
 -1 -8 -10 28.3 6.6
 -1 -8 -10 16.1 4.4
 -1 -8 -10 22.6 6.7
 -1 -8 -10 17.9 7
 -1 -8 -10 24.2 8.2
 -1 -8 -10 21.2 9
 -1 -8 -10 19.8 5.8
 -1 -8 -10 24.4 7
 1 8 10 13.8 5.4
 1 8 10 18.3 3.3
 1 8 10 19.6 3.9
 1 8 10 19.8 6.2
 1 8 10 22 5.9
 1 8 10 13.3 6.2
 1 8 10 20.4 5.1
 1 8 10 13.5 8
 0 -8 -10 62.69 11.1
 0 -8 -10 79.19 12
 0 -8 -10 58.09 12.2
 0 -8 -10 68.39 10
 0 -8 -10 63.79 9.3
 0 -8 -10 82.19 11.8
 0 -8 -10 59.99 10
 0 -8 -10 48 7.9
 0 -8 -10 63.59 11.4
 0 8 10 86.49 12.1
 0 8 10 64.59 11.1
 0 8 10 54.09 12.5
 0 8 10 56.19 7.6
 0 8 10 54.39 7.1
 0 8 10 63.39 8.7
 0 8 10 50.89 8.4
 0 8 10 60.99 6.2
 0 8 10 70.39 10
 1 -8 -10 25.5 8.4
 1 -8 -10 46.8 10
 1 -8 -10 28 6.6
 1 -8 -10 26.3 7
 1 -8 -10 36.6 9.8
 1 -8 -10 31.4 8.1
 1 -8 -10 32 7.4
 1 -8 -10 30 7
 1 -8 -10 26.5 8.1
 -1 8 10 10.2 5.1
 -1 8 10 30.5 5.9
 -1 8 10 31.2 6
 -1 8 10 34.6 5.6
 -1 8 10 37.7 7.5
 -1 8 10 20.5 8.4
 -1 8 10 27.3 6.3
 -1 8 10 38.9 8.4
 -1 8 10 39.9 7.9
 2 -8 -10 64.19 9.9
 2 -8 -10 68.99 12.8
 2 -8 -10 86.39 12.7
 2 -8 -10 68.49 11.6
 2 -8 -10 42.2 8.4
 2 -8 -10 68.79 12.5
 2 -8 -10 33.8 8.5
 2 -8 -10 90.19 13.4
 2 -8 -10 87.29 12
 -2 8 10 67.49 10
 -2 8 10 47.7 7.5
 -2 8 10 69.39 8.2
 -2 8 10 64.29 10.4
 -2 8 10 59.89 10.3
 -2 8 10 56.09 9
 -2 8 10 47.7 11.9
 -2 8 10 85.19 11.5
 -2 8 10 61.69 8.7
 3 -8 -10 237.78 21
 3 -8 -10 275.47 22.1
 3 -8 -10 250.77 23.7
 3 -8 -10 254.67 23.1
 3 -8 -10 274.67 22.3
 3 -8 -10 253.87 19.9
 3 -8 -10 252.67 22.2
 3 -8 -10 190.38 20.1
 -3 8 10 242.68 19
 -3 8 10 258.77 21.7
 -3 8 10 264.47 20.3
 -3 8 10 253.27 20
 -3 8 10 234.98 20.5
 -3 8 10 253.77 18.8
 -3 8 10 201.38 23.4
 -3 8 10 276.17 21.7
 4 -8 -10 11.4 6.7
 4 -8 -10 11.4 7
 4 -8 -10 10.4 8
 4 -8 -10 18 7
 4 -8 -10 16.6 7
 4 -8 -10 12.9 5.8
 -4 8 10 1.3 4.8
 -4 8 10 8.6 4.7
 -4 8 10 6.7 6.7
 -4 8 10 7.3 4.5
 -4 8 10 21.9 7
 -4 8 10 21.2 7.3
 -4 8 10 14.9 6.2
 -4 8 10 8.1 4.8
 5 -8 -10 -2.2 5
 5 -8 -10 -2.3 6.5
 5 -8 -10 1.9 7.8
 5 -8 -10 4.4 5.3
 5 -8 -10 -0.1 4
 5 -8 -10 2 5.1
 -5 8 10 -2 4.4
 -5 8 10 -1.1 4.9
 -5 8 10 -2 4.3
 -5 8 10 -3.8 4.6
 -5 8 10 -1.2 3.8
 -5 8 10 -0.5 3.6
 -5 8 10 1.3 4.6
 6 -8 -10 -2.5 5.3
 6 -8 -10 6.2 5.8
 6 -8 -10 -7.3 6
 6 -8 -10 0.4 6.2
 -6 8 10 -2.1 4.2
 -6 8 10 2.5 5
 -6 8 10 -1 4.4
 -6 8 10 -0.1 5
 -6 8 10 -0.8 4
 7 -8 -10 14.2 7.6
 7 -8 -10 18.3 8
 7 -8 -10 12.1 9.7
 7 -8 -10 37 10.4
 -7 8 10 30.7 8.8
 -7 8 10 15.9 7
 -7 8 10 19.2 6.8
 -7 8 10 12.4 6.5
 8 -8 -10 3.1 6.6
 8 -8 -10 9 6.8
 8 -8 -10 -2.4 8
 -8 8 10 8.3 6.1
 -8 8 10 3.9 5.7
 -8 8 10 2 4.7
 -8 8 10 1.2 5.4
 9 -8 -10 8.3 6.9
 9 -8 -10 -0.2 8.8
 -9 8 10 3.1 8.2
 -9 8 10 -1.9 4.7
 -13 -7 -9 24.4 7.8
 13 7 9 22.5 9.3
 -12 -7 -9 1.4 4.8
 -12 -7 -9 2.7 6.9
 -12 -7 -9 -2.7 4.8
 12 7 9 12.7 8.2
 12 7 9 2.5 6.9
 12 7 9 5.5 5.8
 12 7 9 -3.4 5.8
 12 7 9 3.1 8
 -11 -7 -9 55.59 7.8
 -11 -7 -9 31.8 8.1
 -11 -7 -9 31 10.9
 -11 -7 -9 56.89 9.2
 11 7 9 47.7 12.3
 11 7 9 36.6 9.5
 11 7 9 35.3 11.5
 11 7 9 60.09 12.6
 11 7 9 35.8 9.9
 -10 -7 -9 2.6 6
 -10 -7 -9 2.6 3.9
 -10 -7 -9 3 4.5
 -10 -7 -9 4.9 4.7
 10 7 9 0.9 6
 10 7 9 3.2 5.2
 10 7 9 9 5.8
 10 7 9 13.8 6.7
 10 7 9 22.7 9.4
 -9 -7 -9 20.7 5.8
 -9 -7 -9 1 6.1
 -9 -7 -9 17.3 5.8
 -9 -7 -9 14.3 5.2
 -9 -7 -9 15.6 4.9
 9 7 9 12.4 6.4
 9 7 9 13.8 6.4
 9 7 9 11.5 5.3
 9 7 9 3.8 6.1
 9 7 9 13.1 7.2
 9 7 9 18.4 5.6
 -8 -7 -9 22.1 7.8
 -8 -7 -9 39.9 7
 -8 -7 -9 37.7 6.9
 -8 -7 -9 34.5 6.7
 -8 -7 -9 36.9 7.5
 8 7 9 19.8 6.8
 8 7 9 24.3 6.2
 8 7 9 39.2 6.9
 8 7 9 30.2 7.9
 8 7 9 20.6 8.1
 8 7 9 27.5 9.3
 -7 -7 -9 2.8 5.2
 -7 -7 -9 7.7 6.8
 -7 -7 -9 8.9 4
 -7 -7 -9 -6.4 3
 -7 -7 -9 1.3 4.4
 -7 -7 -9 0.5 3.3
 -7 -7 -9 0.5 3.8
 7 7 9 -5 3.8
 7 7 9 0.7 2.8
 7 7 9 -4.5 2.8
 7 7 9 -7 4.3
 7 7 9 -0.8 3.1
 7 7 9 4.8 3.6
 7 7 9 -1.8 3.9
 7 7 9 -3.7 2.7
 -6 -7 -9 79.49 12.8
 -6 -7 -9 109.59 12.7
 -6 -7 -9 120.79 10.7
 -6 -7 -9 93.19 12.1
 -6 -7 -9 75.99 16.5
 -6 -7 -9 86.69 14.7
 -6 -7 -9 110.89 9.9
 -6 -7 -9 100.09 11.9
 6 7 9 103.79 10.7
 6 7 9 96.09 13.8
 6 7 9 92.99 12.7
 6 7 9 124.79 9.6
 6 7 9 101.29 9.6
 6 7 9 112.89 15.2
 6 7 9 111.99 12.2
 6 7 9 100.19 14.2
 6 7 9 102.89 10.2
 -5 -7 -9 72.59 16.2
 -5 -7 -9 82.29 11.2
 -5 -7 -9 76.89 10.9
 -5 -7 -9 76.99 8
 -5 -7 -9 78.29 12
 -5 -7 -9 93.09 11.1
 -5 -7 -9 69.79 12.7
 -5 -7 -9 72.99 8.8
 -5 -7 -9 74.09 10.5
 -5 -7 -9 89.09 8
 5 7 9 76.69 11.9
 5 7 9 79.19 8.9
 5 7 9 76.79 9.5
 5 7 9 78.29 11.3
 5 7 9 73.49 9.4
 5 7 9 68.39 12.1
 5 7 9 71.99 11.9
 5 7 9 74.79 10
 -4 -7 -9 25.7 6.2
 -4 -7 -9 25.4 6.1
 -4 -7 -9 27.7 7.2
 -4 -7 -9 26.3 8
 -4 -7 -9 33.6 11.1
 -4 -7 -9 26 6.4
 -4 -7 -9 34.6 5.9
 -4 -7 -9 33.7 7.8
 -4 -7 -9 31.3 5.3
 -4 -7 -9 38.5 6
 4 7 9 31.3 6.7
 4 7 9 28.6 5.8
 4 7 9 34.5 6.5
 4 7 9 41.9 6
 4 7 9 40.4 6.4
 4 7 9 30.3 8
 4 7 9 21.1 6.3
 4 7 9 26.5 7.4
 4 7 9 44.9 8.6
 -3 -7 -9 112.69 10.2
 -3 -7 -9 108.89 9.3
 -3 -7 -9 101.29 12.4
 -3 -7 -9 95.79 12.2
 -3 -7 -9 112.69 13.4
 -3 -7 -9 88.89 13.4
 -3 -7 -9 124.39 9.7
 -3 -7 -9 104.69 13.4
 -3 -7 -9 104.99 16.6
 3 7 9 99.79 9.7
 3 7 9 94.09 12.7
 3 7 9 111.19 13.8
 3 7 9 98.49 9
 3 7 9 121.69 11.4
 3 7 9 96.49 10.2
 3 7 9 111.19 14
 3 7 9 85.89 11.8
 -2 -7 -9 22.4 7.4
 -2 -7 -9 15.6 5.2
 -2 -7 -9 22.5 5.2
 -2 -7 -9 12.3 5.6
 -2 -7 -9 12.1 2.9
 -2 -7 -9 12.3 7.3
 -2 -7 -9 23.5 6.2
 -2 -7 -9 12 4.1
 -2 -7 -9 8 4.7
 2 7 9 12.5 5.1
 2 7 9 10.2 4.5
 2 7 9 18.3 4.6
 2 7 9 10.9 6.1
 2 7 9 16.4 2.3
 2 7 9 8.3 3.4
 2 7 9 12.2 4.6
 2 7 9 12.4 4.5
 -1 -7 -9 5.6 5.4
 -1 -7 -9 5.9 4.8
 -1 -7 -9 -0.3 3.9
 -1 -7 -9 -1.1 4.4
 -1 -7 -9 6.7 4.6
 -1 -7 -9 7.8 5.1
 -1 -7 -9 4.2 2.8
 -1 -7 -9 -1.8 3.4
 -1 -7 -9 3.6 3.2
 1 7 9 7.4 4.1
 1 7 9 8.8 4
 1 7 9 2.7 4.8
 1 7 9 4.8 3.2
 1 7 9 2 2
 1 7 9 3.8 3.5
 1 7 9 9 2.7
 1 7 9 6.5 3
 1 7 9 -2.7 4.2
 1 7 9 6 4.3
 0 -7 -9 11.8 4.9
 0 -7 -9 6 4.6
 0 -7 -9 10.7 6.1
 0 -7 -9 17 6.6
 0 -7 -9 16.4 6.6
 0 -7 -9 23.9 7.4
 0 -7 -9 9.1 3.7
 0 -7 -9 11.2 4.6
 0 -7 -9 13.7 5.2
 0 7 9 13 3.6
 0 7 9 11.2 3.7
 0 7 9 8.6 6.1
 0 7 9 10.1 4.5
 0 7 9 20.5 6.2
 0 7 9 9.3 3.9
 0 7 9 14 3.1
 0 7 9 6.1 4.7
 0 7 9 11 4.7
 1 -7 -9 -3.3 4.4
 1 -7 -9 1 3.5
 1 -7 -9 -2.5 3.5
 1 -7 -9 -2.2 2.8
 1 -7 -9 2.1 5.2
 1 -7 -9 0 4.1
 1 -7 -9 -1.9 3.3
 1 -7 -9 -0.9 2.9
 1 -7 -9 0.6 5.3
 -1 7 9 -2.8 2.2
 -1 7 9 -1.1 2.6
 -1 7 9 4.9 3.9
 -1 7 9 0.9 2.7
 -1 7 9 1.8 4.7
 -1 7 9 -1.5 4
 -1 7 9 2.1 3
 -1 7 9 -2.3 3
 -1 7 9 1.2 3.3
 2 -7 -9 27.7 6.5
 2 -7 -9 39.4 8.8
 2 -7 -9 28 6.5
 2 -7 -9 30.1 8.5
 2 -7 -9 31.1 8.2
 2 -7 -9 20.9 6.7
 2 -7 -9 25.7 7.7
 2 -7 -9 28.2 6.4
 2 -7 -9 30.1 7
 -2 7 9 22.3 4.9
 -2 7 9 30.6 6.1
 -2 7 9 14.1 5.4
 -2 7 9 25.4 5.7
 -2 7 9 26.9 6
 -2 7 9 19.8 4.6
 -2 7 9 32.1 7.6
 -2 7 9 37.4 7.4
 -2 7 9 17.7 6.9
 3 -7 -9 63.39 9.8
 3 -7 -9 69.39 11.1
 3 -7 -9 105.19 14.1
 3 -7 -9 94.69 12.1
 3 -7 -9 80.49 11.5
 3 -7 -9 73.89 11.1
 3 -7 -9 84.49 9.8
 3 -7 -9 73.39 12.8
 3 -7 -9 78.89 11.3
 -3 7 9 94.69 11.8
 -3 7 9 76.29 10.6
 -3 7 9 80.79 10.5
 -3 7 9 88.49 8.7
 -3 7 9 53.29 7.9
 -3 7 9 68.79 9.6
 -3 7 9 59.79 11.9
 -3 7 9 100.89 13.3
 -3 7 9 87.09 10
 4 -7 -9 94.99 10.4
 4 -7 -9 106.09 16.1
 4 -7 -9 55.69 9.5
 4 -7 -9 86.69 11.6
 4 -7 -9 97.89 13.2
 4 -7 -9 77.29 12.6
 4 -7 -9 68.49 11.9
 4 -7 -9 62.89 10.8
 -4 7 9 89.69 11.9
 -4 7 9 88.39 9.1
 -4 7 9 81.69 10.8
 -4 7 9 87.99 11.7
 -4 7 9 88.89 11.3
 -4 7 9 74.19 9.9
 -4 7 9 87.19 11.5
 -4 7 9 68.29 13.1
 5 -7 -9 5.1 4.9
 5 -7 -9 20.6 6.6
 5 -7 -9 20.5 9.8
 5 -7 -9 24.2 7.6
 5 -7 -9 15.6 5.5
 5 -7 -9 17.5 9.7
 5 -7 -9 19.1 6.7
 5 -7 -9 26.2 7.8
 -5 7 9 17.8 7.4
 -5 7 9 16.6 6
 -5 7 9 20.2 5.3
 -5 7 9 20.2 6.1
 -5 7 9 27.3 6.4
 -5 7 9 12.1 5.7
 -5 7 9 28.4 6.5
 -5 7 9 11.1 5.3
 6 -7 -9 1.8 5.4
 6 -7 -9 15.8 8.6
 6 -7 -9 10.5 6.5
 6 -7 -9 -1.1 4.8
 6 -7 -9 -2.8 3.1
 6 -7 -9 -2.7 4.6
 -6 7 9 -6 3.8
 -6 7 9 -4.6 3
 -6 7 9 -1.1 4.4
 -6 7 9 1.7 3.7
 -6 7 9 -0.9 4.8
 -6 7 9 2.2 4.3
 7 -7 -9 -8.9 3.5
 7 -7 -9 -2.4 4.7
 7 -7 -9 -5.7 7
 7 -7 -9 -1 5.6
 -7 7 9 -0.2 5.3
 -7 7 9 0.7 4.9
 -7 7 9 -3.5 4
 -7 7 9 -1.3 3.8
 8 -7 -9 -7.9 4.1
 8 -7 -9 4.4 6.4
 8 -7 -9 -7.3 6.9
 8 -7 -9 -14.8 6.7
 -8 7 9 4.4 4.9
 -8 7 9 -4.2 4.3
 -8 7 9 12.4 6.2
 -8 7 9 -1.4 4.5
 9 -7 -9 11.1 9.7
 9 -7 -9 0.3 5.5
 9 -7 -9 9.1 7.8
 -9 7 9 1.9 5.7
 -9 7 9 5.3 4.9
 -9 7 9 11.4 6.1
 -9 7 9 8 6.1
 10 -7 -9 0.8 7
 10 -7 -9 -6.5 6.2
 10 -7 -9 -11.5 7.7
 -10 7 9 -1.8 4.4
 -10 7 9 2.7 6.2
 -10 7 9 -6.2 4.4
 -10 7 9 4.3 4.6
 -13 -6 -8 43.1 11.8
 -13 -6 -8 65.59 9
 -13 -6 -8 59.59 11.2
 13 6 8 50.29 12.6
 13 6 8 66.69 16.8
 13 6 8 52.39 12.6
 13 6 8 55.39 11.2
 13 6 8 82.99 14.6
 -12 -6 -8 67.69 14.8
 -12 -6 -8 71.59 11.7
 -12 -6 -8 93.59 10.7
 12 6 8 85.39 12.8
 12 6 8 57.09 14.1
 12 6 8 67.59 11.6
 12 6 8 87.79 15.2
 12 6 8 98.39 17.5
 12 6 8 60.59 12.9
 -11 -6 -8 31.8 7.9
 -11 -6 -8 26.7 9.6
 -11 -6 -8 39.7 7.1
 -11 -6 -8 20.7 5.3
 11 6 8 20.1 8.5
 11 6 8 36.5 11
 11 6 8 32 11
 11 6 8 26 7.6
 11 6 8 32.6 8.8
 11 6 8 30.2 7.8
 -10 -6 -8 285.17 28.1
 -10 -6 -8 316.37 22.3
 -10 -6 -8 316.97 23.5
 -10 -6 -8 339.87 24.6
 10 6 8 263.07 25.7
 10 6 8 334.87 24.5
 10 6 8 319.77 28.4
 10 6 8 363.16 30
 10 6 8 336.37 27.3
 10 6 8 304.47 25.5
 -9 -6 -8 70.69 9.3
 -9 -6 -8 71.99 9.9
 -9 -6 -8 50.99 11.4
 -9 -6 -8 59.79 9.2
 -9 -6 -8 100.59 11.2
 -9 -6 -8 74.29 9
 9 6 8 66.49 11.5
 9 6 8 56.49 12.2
 9 6 8 47.6 10.7
 9 6 8 63.79 11.7
 9 6 8 73.09 9.9
 9 6 8 64.79 9.1
 9 6 8 76.09 12.7
 -8 -6 -8 550.54 36.5
 -8 -6 -8 559.14 36.4
 -8 -6 -8 529.95 35.5
 -8 -6 -8 562.04 36.2
 -8 -6 -8 520.55 40.6
 -8 -6 -8 441.96 45.2
 -8 -6 -8 565.74 34.1
 -8 -6 -8 552.24 36.5
 8 6 8 572.34 38.9
 8 6 8 457.85 37.9
 8 6 8 536.15 35.9
 8 6 8 614.74 39.4
 8 6 8 575.04 36.2
 8 6 8 582.24 41.5
 8 6 8 519.25 36.6
 8 6 8 552.94 40.4
 -7 -6 -8 5.8 4
 -7 -6 -8 9.9 5.6
 -7 -6 -8 9.3 4.2
 -7 -6 -8 10.8 4.2
 -7 -6 -8 7.9 6.8
 -7 -6 -8 -1.2 3.8
 -7 -6 -8 3.4 3.5
 7 6 8 7.5 4.7
 7 6 8 8.5 3.6
 7 6 8 6.8 4.1
 7 6 8 9.7 5.1
 7 6 8 5.2 4.3
 7 6 8 11.5 4.6
 7 6 8 10.8 3.6
 7 6 8 8 6.1
 -6 -6 -8 72.39 8.7
 -6 -6 -8 56.49 10.5
 -6 -6 -8 103.49 11.9
 -6 -6 -8 93.29 8.6
 -6 -6 -8 97.29 11.3
 -6 -6 -8 60.49 14.6
 -6 -6 -8 77.89 10
 -6 -6 -8 93.09 10.8
 6 6 8 92.69 13.4
 6 6 8 97.29 8.8
 6 6 8 58.99 10.1
 6 6 8 76.99 9.6
 6 6 8 87.49 8.5
 6 6 8 81.79 9.8
 6 6 8 90.29 12.2
 6 6 8 88.49 13.2
 6 6 8 85.69 7.5
 -5 -6 -8 0.6 4
 -5 -6 -8 0.5 2.7
 -5 -6 -8 -0.7 3.1
 -5 -6 -8 4.8 2.9
 -5 -6 -8 -0.2 3.3
 -5 -6 -8 0.4 3.5
 -5 -6 -8 2.9 3.1
 -5 -6 -8 0.3 3.6
 5 6 8 -0.5 4.1
 5 6 8 -3.2 2.1
 5 6 8 1.2 2.3
 5 6 8 -3.4 3
 5 6 8 3.4 3.6
 5 6 8 0.8 2.9
 5 6 8 -6.1 2.7
 5 6 8 1 3
 -4 -6 -8 52.59 12.6
 -4 -6 -8 55.39 8.8
 -4 -6 -8 50.39 8.2
 -4 -6 -8 53.19 8.4
 -4 -6 -8 59.89 7
 -4 -6 -8 55.89 9.6
 -4 -6 -8 68.99 6.5
 -4 -6 -8 42 7.6
 -4 -6 -8 73.99 7.9
 -4 -6 -8 42.8 9
 4 6 8 61.79 8
 4 6 8 61.89 7.6
 4 6 8 57.89 7.6
 4 6 8 50.09 9.2
 4 6 8 52.79 9
 4 6 8 66.19 8.1
 4 6 8 52.39 9.4
 4 6 8 61.69 7.4
 4 6 8 48.8 8.9
 -3 -6 -8 0.2 3.1
 -3 -6 -8 4 5.6
 -3 -6 -8 4.2 4.4
 -3 -6 -8 0 3
 -3 -6 -8 7.2 3.1
 -3 -6 -8 5.5 4
 -3 -6 -8 1.8 2.7
 -3 -6 -8 2.1 2.4
 -3 -6 -8 -1.3 2.8
 -3 -6 -8 -0.2 2.4
 3 6 8 1.2 3
 3 6 8 -2.2 2.8
 3 6 8 0.9 2.6
 3 6 8 0.9 3.4
 3 6 8 5.6 2.8
 3 6 8 7.2 4.6
 3 6 8 3.9 4.2
 3 6 8 5.9 3.2
 -2 -6 -8 5.7 3.2
 -2 -6 -8 -0.6 3.6
 -2 -6 -8 2.3 3.9
 -2 -6 -8 -0.8 2.5
 -2 -6 -8 2.6 3.4
 -2 -6 -8 -0.6 3.9
 -2 -6 -8 4.6 3.5
 -2 -6 -8 10.4 3.7
 -2 -6 -8 3.9 3.8
 2 6 8 -1.5 2.9
 2 6 8 -0.4 3.6
 2 6 8 3.3 3.4
 2 6 8 0.8 2.8
 2 6 8 1.7 2.4
 2 6 8 2.3 2.1
 2 6 8 3.2 4
 2 6 8 1.6 1.2
 2 6 8 3.2 2.7
 -1 -6 -8 -0.6 3.8
 -1 -6 -8 -2.3 3.1
 -1 -6 -8 0.2 4
 -1 -6 -8 -0.8 2.5
 -1 -6 -8 0.6 3.7
 -1 -6 -8 1.6 3.4
 -1 -6 -8 -0.3 1.9
 -1 -6 -8 3 3
 -1 -6 -8 -2.4 3.1
 -1 -6 -8 0 3.4
 1 6 8 -1.4 1.8
 1 6 8 -0.5 2.2
 1 6 8 1.9 4.6
 1 6 8 0.5 1.4
 1 6 8 1.5 2.8
 1 6 8 -0.7 2.9
 1 6 8 -0.7 2.4
 1 6 8 -1.5 2.4
 1 6 8 -0.4 2.7
 1 6 8 1.1 1.8
 0 -6 -8 55.69 8.4
 0 -6 -8 72.99 8.9
 0 -6 -8 41.5 6.9
 0 -6 -8 46.6 6.5
 0 -6 -8 41.9 7.7
 0 -6 -8 48.9 8.9
 0 -6 -8 61.69 9.1
 0 -6 -8 47 7.1
 0 -6 -8 50.09 10.1
 0 6 8 51.59 5.5
 0 6 8 39.5 5.7
 0 6 8 48.3 7.6
 0 6 8 47.4 5.9
 0 6 8 43.4 6.9
 0 6 8 54.19 5.8
 0 6 8 41.7 9.5
 0 6 8 36.5 6.9
 0 6 8 43.5 7.8
 0 6 8 57.99 7.4
 1 -6 -8 69.89 8.5
 1 -6 -8 80.39 11
 1 -6 -8 86.09 10.7
 1 -6 -8 62.79 8.9
 1 -6 -8 55.69 8
 1 -6 -8 57.49 8.5
 1 -6 -8 65.59 8.6
 1 -6 -8 57.99 8.6
 1 -6 -8 71.39 11
 1 -6 -8 74.19 10.4
 -1 6 8 47.4 10.2
 -1 6 8 68.59 7.3
 -1 6 8 63.59 7.3
 -1 6 8 49.99 8.1
 -1 6 8 63.19 7.9
 -1 6 8 66.29 9.8
 -1 6 8 67.29 8.9
 -1 6 8 75.59 8.9
 -1 6 8 74.49 6.8
 -1 6 8 48.9 10.3
 -1 6 8 58.29 7.8
 2 -6 -8 87.79 11.5
 2 -6 -8 124.39 12
 2 -6 -8 109.69 13.7
 2 -6 -8 123.89 11.5
 2 -6 -8 117.99 11.6
 2 -6 -8 125.19 15.6
 2 -6 -8 134.59 11.5
 2 -6 -8 136.99 13.4
 2 -6 -8 105.19 11.3
 -2 6 8 118.19 11.2
 -2 6 8 129.29 12.2
 -2 6 8 115.19 10.2
 -2 6 8 97.49 13.5
 -2 6 8 99.69 9.5
 -2 6 8 124.69 12.2
 -2 6 8 127.29 13.5
 -2 6 8 92.79 12.2
 -2 6 8 130.89 11.2
 -2 6 8 125.69 10.4
 3 -6 -8 118.59 11.1
 3 -6 -8 118.99 13.8
 3 -6 -8 110.89 11.9
 3 -6 -8 126.49 11.2
 3 -6 -8 116.79 12.4
 3 -6 -8 125.49 12.7
 3 -6 -8 125.59 12.8
 3 -6 -8 105.39 12.6
 3 -6 -8 133.39 12.2
 3 -6 -8 131.89 16.4
 -3 6 8 127.99 10.9
 -3 6 8 113.99 13.1
 -3 6 8 97.09 9.8
 -3 6 8 137.19 12.7
 -3 6 8 92.09 12
 -3 6 8 96.79 13.3
 -3 6 8 143.79 10.7
 -3 6 8 108.39 11
 -3 6 8 128.79 12.2
 -3 6 8 121.59 11.8
 -3 6 8 96.59 12.2
 4 -6 -8 4.1 3.7
 4 -6 -8 -4.6 4
 4 -6 -8 2.7 3.4
 4 -6 -8 5 6.5
 4 -6 -8 -5 3.8
 4 -6 -8 3.1 4.1
 4 -6 -8 -3.1 3.6
 4 -6 -8 0.1 3.4
 4 -6 -8 -7 4
 -4 6 8 -2.3 2.8
 -4 6 8 2.8 3.7
 -4 6 8 -0.3 3.5
 -4 6 8 2.3 3.9
 -4 6 8 0 3.6
 -4 6 8 5.6 3
 -4 6 8 2.7 4.5
 -4 6 8 -0.9 4.3
 -4 6 8 6.1 3.8
 5 -6 -8 189.58 18.2
 5 -6 -8 208.78 17.3
 5 -6 -8 174.38 17.7
 5 -6 -8 172.28 15.6
 5 -6 -8 200.48 18.2
 5 -6 -8 187.38 15.5
 5 -6 -8 203.58 16.9
 5 -6 -8 151.18 16.1
 5 -6 -8 184.28 20.2
 -5 6 8 170.08 16.9
 -5 6 8 230.48 18
 -5 6 8 219.68 15.8
 -5 6 8 228.18 17.8
 -5 6 8 193.48 16.1
 -5 6 8 193.28 16.1
 -5 6 8 174.48 18
 6 -6 -8 301.77 22.7
 6 -6 -8 276.27 22.3
 6 -6 -8 286.57 23.7
 6 -6 -8 302.27 28.1
 6 -6 -8 362.66 26.1
 6 -6 -8 313.17 24.4
 -6 6 8 304.87 24.7
 -6 6 8 344.87 25
 -6 6 8 323.27 23.9
 -6 6 8 322.37 24.5
 -6 6 8 330.07 24
 -6 6 8 286.27 25.4
 -6 6 8 316.17 21.8
 7 -6 -8 12.9 9.2
 7 -6 -8 18.6 5.5
 7 -6 -8 41.1 9.3
 7 -6 -8 30.9 7.3
 7 -6 -8 29 7.9
 -7 6 8 41.6 8.4
 -7 6 8 34.8 11.9
 -7 6 8 36.1 8
 -7 6 8 29.9 7.7
 -7 6 8 36.2 7.9
 8 -6 -8 6.2 5.6
 8 -6 -8 9.1 8.5
 8 -6 -8 -1.9 4.4
 8 -6 -8 1.7 5.3
 -8 6 8 -0.8 4.5
 -8 6 8 -5.5 4.3
 -8 6 8 0.2 4.3
 -8 6 8 -2.6 3.8
 9 -6 -8 -6.9 7.6
 9 -6 -8 0.4 5.2
 9 -6 -8 2.5 7.5
 -9 6 8 -2 4.1
 -9 6 8 0.4 5
 -9 6 8 2.8 4.6
 -9 6 8 -0.9 4
 10 -6 -8 20.6 9.3
 10 -6 -8 11.9 7.6
 10 -6 -8 18.1 11.2
 -10 6 8 19.5 7.6
 -10 6 8 26.3 7.3
 -10 6 8 31 8.3
 -10 6 8 25.2 7.4
 -13 -5 -7 2.3 4.1
 -13 -5 -7 -4.1 4.7
 -13 -5 -7 -1.4 5.6
 13 5 7 10.1 7.2
 13 5 7 -0.8 5.1
 13 5 7 -0.8 5.7
 13 5 7 -3.3 5.7
 13 5 7 0.6 6.7
 -12 -5 -7 2.3 3.7
 -12 -5 -7 -7.5 4.4
 -12 -5 -7 -5.2 4.1
 12 5 7 1.6 5.2
 12 5 7 1.4 4.7
 12 5 7 1.3 6.5
 12 5 7 -2.6 6
 12 5 7 12.1 6.7
 12 5 7 3.9 4.4
 -11 -5 -7 7.9 6.6
 -11 -5 -7 14.1 6.3
 -11 -5 -7 10.2 4.7
 11 5 7 9.5 5.5
 11 5 7 17.9 8.1
 11 5 7 21 9
 11 5 7 16.9 6.6
 11 5 7 10.1 6.6
 11 5 7 19.3 7.5
 -10 -5 -7 175.08 16.5
 -10 -5 -7 164.68 12.9
 -10 -5 -7 170.08 15.3
 -10 -5 -7 164.58 14
 -10 -5 -7 143.89 18.4
 -10 -5 -7 180.08 13.4
 -10 -5 -7 167.18 13.6
 10 5 7 143.29 18
 10 5 7 160.88 17.3
 10 5 7 173.88 16.1
 10 5 7 158.48 15.3
 10 5 7 162.98 21.7
 10 5 7 179.68 19
 -9 -5 -7 56.29 7.5
 -9 -5 -7 68.69 9.6
 -9 -5 -7 55.29 6.4
 -9 -5 -7 71.29 8.6
 -9 -5 -7 65.39 8.4
 -9 -5 -7 48.4 14.5
 -9 -5 -7 52.69 10.9
 -9 -5 -7 54.39 7.1
 -9 -5 -7 34 7.3
 9 5 7 70.09 8.6
 9 5 7 58.99 10.1
 9 5 7 65.29 11.6
 9 5 7 70.59 13.5
 9 5 7 65.69 9.4
 9 5 7 67.29 12.3
 9 5 7 62.29 11.4
 -8 -5 -7 40.5 6.4
 -8 -5 -7 30.9 5
 -8 -5 -7 33.9 8.5
 -8 -5 -7 47.8 5.1
 -8 -5 -7 35.2 6.8
 -8 -5 -7 40.7 6.4
 -8 -5 -7 41.7 6.9
 -8 -5 -7 19.8 10.1
 -8 -5 -7 36.5 6.7
 8 5 7 25.6 7
 8 5 7 38.9 7.4
 8 5 7 48.7 7.6
 8 5 7 33.7 9.2
 8 5 7 44.7 8.7
 8 5 7 62.89 9.9
 8 5 7 58.99 11.1
 8 5 7 45.2 6.9
 -7 -5 -7 59.39 8
 -7 -5 -7 69.79 8.3
 -7 -5 -7 65.29 8.4
 -7 -5 -7 64.99 8.5
 -7 -5 -7 51.69 5.3
 -7 -5 -7 57.29 5
 -7 -5 -7 50.69 7.8
 -7 -5 -7 33.4 8.3
 -7 -5 -7 60.19 8.4
 -7 -5 -7 32.6 11.2
 7 5 7 55.19 7.7
 7 5 7 47.3 7.1
 7 5 7 53.79 9.3
 7 5 7 73.19 8.9
 7 5 7 75.29 10.4
 7 5 7 60.69 10.3
 7 5 7 47.7 8.8
 7 5 7 64.89 7
 7 5 7 48.5 10.4
 -6 -5 -7 0.3 2.8
 -6 -5 -7 -3.9 3
 -6 -5 -7 3.4 2.8
 -6 -5 -7 -0.8 2
 -6 -5 -7 2.6 3.1
 -6 -5 -7 2.4 3.6
 -6 -5 -7 3.2 3
 -6 -5 -7 -0.5 2.4
 -6 -5 -7 -3.6 4.2
 6 5 7 4.8 4
 6 5 7 -2.8 4.1
 6 5 7 -1.4 2
 6 5 7 -2.1 3.2
 6 5 7 2.1 2.2
 6 5 7 1.1 1.8
 6 5 7 -1.9 2.4
 6 5 7 -0.1 2.6
 6 5 7 -1.4 2.1
 -5 -5 -7 156.08 12.1
 -5 -5 -7 112.89 16.5
 -5 -5 -7 128.89 11.4
 -5 -5 -7 118.99 9.9
 -5 -5 -7 112.89 10.7
 -5 -5 -7 122.19 11.3
 -5 -5 -7 118.09 13
 -5 -5 -7 134.59 10.4
 -5 -5 -7 135.59 10.6
 5 5 7 107.59 10.3
 5 5 7 103.59 14.2
 5 5 7 134.59 13.3
 5 5 7 135.49 12.3
 5 5 7 116.09 10.5
 5 5 7 138.79 13
 5 5 7 145.49 10.1
 5 5 7 111.69 11.3
 5 5 7 120.69 10.5
 -4 -5 -7 -0.5 2.6
 -4 -5 -7 -2 2.6
 -4 -5 -7 1.7 2.2
 -4 -5 -7 -0.9 2.2
 -4 -5 -7 3.9 3.2
 -4 -5 -7 2.4 2.7
 -4 -5 -7 2.1 3.1
 -4 -5 -7 5 4.6
 -4 -5 -7 -2.3 1.9
 4 5 7 -2 2.2
 4 5 7 0.9 2.3
 4 5 7 -1.5 1.8
 4 5 7 -4.1 3.1
 4 5 7 -0.4 2.6
 4 5 7 5 3.9
 4 5 7 -0.2 2.7
 4 5 7 -1.7 1.8
 4 5 7 -1.6 1.8
 -3 -5 -7 140.59 12
 -3 -5 -7 140.69 10.3
 -3 -5 -7 136.29 10.5
 -3 -5 -7 122.39 11.9
 -3 -5 -7 142.29 12.4
 -3 -5 -7 151.08 12.2
 -3 -5 -7 131.89 12.8
 -3 -5 -7 121.69 15.8
 3 5 7 127.89 12.8
 3 5 7 141.29 11
 3 5 7 125.39 10.9
 3 5 7 138.49 11.5
 3 5 7 116.39 12
 3 5 7 124.89 11.5
 3 5 7 147.39 10.5
 3 5 7 146.79 13.4
 3 5 7 134.49 10.7
 -2 -5 -7 29 5.5
 -2 -5 -7 21.1 7.2
 -2 -5 -7 22.1 3.9
 -2 -5 -7 21.2 5.5
 -2 -5 -7 22.3 5.5
 -2 -5 -7 23.7 5.2
 -2 -5 -7 35.6 4.6
 -2 -5 -7 34.6 5.1
 -2 -5 -7 27 6.2
 2 5 7 29.7 5.4
 2 5 7 27.5 5.6
 2 5 7 30.3 5.5
 2 5 7 22.5 5.8
 2 5 7 32.7 4.2
 2 5 7 9.3 3.2
 2 5 7 22.7 4.3
 2 5 7 35.5 6.5
 -1 -5 -7 -4.5 3
 -1 -5 -7 3.5 2.6
 -1 -5 -7 0.4 2.4
 -1 -5 -7 -1.3 1.8
 -1 -5 -7 1 1.7
 -1 -5 -7 -2.5 2.4
 -1 -5 -7 -4.2 2.4
 -1 -5 -7 -0.4 3.2
 -1 -5 -7 1.8 2.9
 1 5 7 -1.8 1.6
 1 5 7 -1.1 2.9
 1 5 7 0.3 1.1
 1 5 7 1.4 2.2
 1 5 7 0.7 1.5
 1 5 7 1.2 3
 1 5 7 -4.2 2
 1 5 7 0.3 3.3
 1 5 7 0.8 3.8
 1 5 7 1.7 2.4
 1 5 7 -0.5 2.3
 0 -5 -7 737.93 46.2
 0 -5 -7 761.82 47.1
 0 -5 -7 685.23 46.5
 0 -5 -7 771.92 47.4
 0 -5 -7 763.12 46.8
 0 -5 -7 738.23 49.4
 0 -5 -7 744.93 46.4
 0 -5 -7 681.93 44.9
 0 -5 -7 719.33 46.5
 0 -5 -7 683.93 45.5
 0 5 7 704.33 46.7
 0 5 7 763.42 46.6
 0 5 7 721.43 44.4
 0 5 7 729.53 47.1
 0 5 7 745.13 45.4
 0 5 7 584.14 48.9
 0 5 7 763.52 44.1
 0 5 7 691.63 44.5
 0 5 7 721.63 46.4
 0 5 7 763.32 44.5
 0 5 7 754.92 45.8
 1 -5 -7 -1.1 2.3
 1 -5 -7 2.3 3.1
 1 -5 -7 2.1 2.5
 1 -5 -7 0.6 2.9
 1 -5 -7 -3.8 2.9
 1 -5 -7 2.8 3.3
 1 -5 -7 1.9 3.2
 1 -5 -7 -0.2 3.8
 1 -5 -7 -0.3 2.4
 1 -5 -7 -2.9 2.6
 1 -5 -7 5.1 3.3
 -1 5 7 1.3 2.7
 -1 5 7 -2 2.5
 -1 5 7 -1.9 2
 -1 5 7 -0.4 2.7
 -1 5 7 -1.6 2
 -1 5 7 0.6 1.8
 -1 5 7 3.4 3
 -1 5 7 -2.5 2.8
 -1 5 7 -1.1 1.9
 -1 5 7 6.8 3.7
 -1 5 7 3.3 2.4
 2 -5 -7 2.8 2.9
 2 -5 -7 5.1 3.1
 2 -5 -7 2.6 3.2
 2 -5 -7 1.6 2.7
 2 -5 -7 -1.1 3
 2 -5 -7 5.6 3.3
 2 -5 -7 10.4 4.3
 2 -5 -7 4.5 3.6
 2 -5 -7 3.5 3.1
 2 -5 -7 9.2 5.5
 2 -5 -7 -1.8 3.4
 -2 5 7 3.6 2.4
 -2 5 7 -2.4 2.3
 -2 5 7 3.6 3.2
 -2 5 7 2.5 3.3
 -2 5 7 3.1 3.1
 -2 5 7 8.1 4.4
 -2 5 7 5.5 3.9
 -2 5 7 -0.2 2.3
 -2 5 7 3 2.5
 -2 5 7 3.5 2.6
 -2 5 7 7 2.8
 3 -5 -7 238.28 17.2
 3 -5 -7 252.27 16.7
 3 -5 -7 245.68 18.8
 3 -5 -7 246.28 18.1
 3 -5 -7 228.68 20.1
 3 -5 -7 205.88 17.2
 3 -5 -7 237.88 16.1
 3 -5 -7 206.48 17.9
 3 -5 -7 247.18 16.8
 3 -5 -7 220.08 17.8
 3 -5 -7 226.48 18.2
 -3 5 7 206.78 17
 -3 5 7 221.38 18.3
 -3 5 7 202.18 18.8
 -3 5 7 226.18 17.6
 -3 5 7 244.28 18.2
 -3 5 7 215.48 17.7
 -3 5 7 210.78 17.2
 -3 5 7 211.78 15.7
 -3 5 7 210.58 16.5
 -3 5 7 171.68 16.3
 -3 5 7 271.87 16.2
 4 -5 -7 97.99 9.7
 4 -5 -7 114.59 13.3
 4 -5 -7 87.19 11.9
 4 -5 -7 99.59 14.3
 4 -5 -7 107.29 9.7
 4 -5 -7 79.99 10.7
 4 -5 -7 90.29 11.7
 4 -5 -7 99.29 9.2
 4 -5 -7 104.49 10.8
 4 -5 -7 96.79 9
 -4 5 7 85.69 9.2
 -4 5 7 106.19 11.9
 -4 5 7 97.39 9.7
 -4 5 7 81.39 11
 -4 5 7 109.59 10.8
 -4 5 7 95.59 10.6
 -4 5 7 90.69 10.8
 -4 5 7 101.89 10.9
 -4 5 7 86.69 11.6
 5 -5 -7 75.19 8.6
 5 -5 -7 65.59 10.3
 5 -5 -7 71.29 7
 5 -5 -7 65.79 10.3
 5 -5 -7 69.99 11.1
 5 -5 -7 64.19 8.6
 5 -5 -7 85.79 10
 5 -5 -7 91.19 14.3
 5 -5 -7 81.99 10.7
 5 -5 -7 76.99 10.8
 -5 5 7 73.79 10
 -5 5 7 85.69 10.3
 -5 5 7 61.39 9.8
 -5 5 7 65.59 9.4
 -5 5 7 76.29 8.7
 -5 5 7 73.99 10
 -5 5 7 77.29 10.4
 -5 5 7 77.69 10.8
 -5 5 7 60.79 8.1
 6 -5 -7 148.49 14.9
 6 -5 -7 142.99 16.1
 6 -5 -7 169.48 18.7
 6 -5 -7 150.28 11.2
 6 -5 -7 167.38 13.5
 6 -5 -7 173.48 14.8
 6 -5 -7 137.69 13.1
 6 -5 -7 146.29 13.9
 6 -5 -7 182.98 16.5
 -6 5 7 159.08 14.7
 -6 5 7 171.28 14.2
 -6 5 7 177.78 16.3
 -6 5 7 166.88 14.9
 -6 5 7 170.48 14.8
 -6 5 7 144.09 12.2
 -6 5 7 163.48 15.9
 -6 5 7 175.48 15.1
 7 -5 -7 92.29 11.8
 7 -5 -7 113.09 14.2
 7 -5 -7 102.99 10.4
 7 -5 -7 78.99 15.3
 7 -5 -7 112.99 13.2
 7 -5 -7 95.49 13.6
 -7 5 7 98.59 13.9
 -7 5 7 121.89 13.5
 -7 5 7 116.79 14.1
 -7 5 7 127.99 12.4
 -7 5 7 131.59 12.7
 -7 5 7 111.39 13.5
 8 -5 -7 21.3 7.8
 8 -5 -7 24.5 7.2
 8 -5 -7 17 5.6
 8 -5 -7 23.2 7.1
 8 -5 -7 37.8 8.8
 8 -5 -7 15.9 9.5
 8 -5 -7 19 5.2
 -8 5 7 25.9 7.2
 -8 5 7 30.8 7.1
 -8 5 7 27.9 7.5
 -8 5 7 29.5 7.1
 9 -5 -7 -2.7 6.3
 9 -5 -7 14.4 7.2
 9 -5 -7 5.5 6.2
 -9 5 7 -3.1 3.3
 -9 5 7 0 4.7
 -9 5 7 11.3 5.8
 -9 5 7 -0.5 3.7
 10 -5 -7 1.6 6.5
 10 -5 -7 4.4 6.5
 10 -5 -7 10.2 9.6
 -10 5 7 6.6 5.4
 -10 5 7 -0.6 5
 -10 5 7 5.8 4.2
 -10 5 7 5.1 4.7
 11 -5 -7 23.3 8.8
 11 -5 -7 16.3 10.9
 11 -5 -7 -1.8 5.7
 -11 5 7 12.1 5.2
 -11 5 7 2.5 5.6
 -11 5 7 4.4 4.7
 -11 5 7 2 4.8
 -13 -4 -6 6.3 4.1
 -13 -4 -6 11.9 7.5
 -13 -4 -6 0.4 5
 13 4 6 -8.8 4.1
 13 4 6 7.1 6.7
 13 4 6 2.8 6.2
 13 4 6 -7.1 5.5
 13 4 6 -4.8 5.8
 -12 -4 -6 3.8 5.5
 -12 -4 -6 2.4 3.5
 -12 -4 -6 3.9 4.6
 -12 -4 -6 -0.4 3.9
 12 4 6 9.4 6.1
 12 4 6 -5.5 3.7
 12 4 6 -1.4 6.4
 12 4 6 0.2 5
 12 4 6 5 6.5
 -11 -4 -6 1.6 3.1
 -11 -4 -6 1.7 3.3
 -11 -4 -6 -2.8 3.7
 -11 -4 -6 -1.4 4.4
 -11 -4 -6 2.9 4.3
 -11 -4 -6 0.3 2.2
 11 4 6 -0.7 4.8
 11 4 6 12.1 7.8
 11 4 6 13.2 6.3
 11 4 6 4.6 4.8
 11 4 6 2.9 4.3
 11 4 6 -6 4.3
 -10 -4 -6 57.29 7.2
 -10 -4 -6 43.6 7.6
 -10 -4 -6 49.99 7.3
 -10 -4 -6 39.5 9.8
 -10 -4 -6 46.5 6.6
 -10 -4 -6 35.4 7.6
 -10 -4 -6 61.89 7.3
 -10 -4 -6 42.5 6.8
 10 4 6 41.4 8
 10 4 6 34.1 8.8
 10 4 6 45.6 9.6
 10 4 6 47.8 12.6
 10 4 6 59.69 12.1
 10 4 6 39.6 8.2
 10 4 6 34.4 7
 -9 -4 -6 190.08 14.9
 -9 -4 -6 207.38 15.2
 -9 -4 -6 211.48 15.5
 -9 -4 -6 196.18 14.8
 -9 -4 -6 201.28 20.1
 -9 -4 -6 203.88 17.1
 -9 -4 -6 190.28 15.5
 -9 -4 -6 208.28 16.8
 9 4 6 192.88 16.3
 9 4 6 230.48 19.2
 9 4 6 183.28 18.9
 9 4 6 195.98 16.9
 9 4 6 213.48 15.9
 9 4 6 193.78 18.2
 9 4 6 199.18 24.1
 9 4 6 197.18 17
 -8 -4 -6 148.29 10.9
 -8 -4 -6 122.79 15.2
 -8 -4 -6 141.19 11.4
 -8 -4 -6 140.29 12.7
 -8 -4 -6 134.19 11.5
 -8 -4 -6 126.19 11.2
 -8 -4 -6 134.09 11
 -8 -4 -6 138.09 11.5
 -8 -4 -6 142.89 12.6
 8 4 6 127.09 13.6
 8 4 6 131.79 12.5
 8 4 6 144.39 13.4
 8 4 6 158.88 12.1
 8 4 6 143.69 12.2
 8 4 6 147.49 19
 8 4 6 138.09 12.5
 8 4 6 137.29 14.1
 8 4 6 144.99 15.3
 -7 -4 -6 7.2 3.5
 -7 -4 -6 9.9 4.1
 -7 -4 -6 6.3 3.1
 -7 -4 -6 10.6 3.2
 -7 -4 -6 9.4 3.7
 -7 -4 -6 8.6 4.6
 -7 -4 -6 9.3 3.5
 -7 -4 -6 7.8 2.9
 -7 -4 -6 5.3 2.2
 7 4 6 11.9 3.6
 7 4 6 12.7 3.8
 7 4 6 6 5.5
 7 4 6 2.2 2.9
 7 4 6 14.4 5.5
 7 4 6 5.4 3.8
 7 4 6 6.7 4.2
 7 4 6 10.7 4.7
 7 4 6 9.1 4.4
 -6 -4 -6 40.9 5.9
 -6 -4 -6 41.6 4
 -6 -4 -6 48 6.4
 -6 -4 -6 41.5 4.8
 -6 -4 -6 27.5 6.9
 -6 -4 -6 44.6 6.6
 -6 -4 -6 41.2 6.3
 -6 -4 -6 40.1 4.9
 -6 -4 -6 49.6 6.7
 -6 -4 -6 44.7 6.1
 6 4 6 43 5.7
 6 4 6 24.9 7.2
 6 4 6 41 6.5
 6 4 6 58.79 7.2
 6 4 6 42.5 5.7
 6 4 6 32.4 7.6
 6 4 6 40.1 7
 6 4 6 52.39 8.2
 6 4 6 44.3 7.6
 6 4 6 42.9 4.2
 -5 -4 -6 368.56 23.7
 -5 -4 -6 341.47 23
 -5 -4 -6 323.37 21.9
 -5 -4 -6 258.87 28.4
 -5 -4 -6 325.27 25.6
 -5 -4 -6 373.96 23.1
 -5 -4 -6 320.67 23.2
 -5 -4 -6 352.66 23.5
 -5 -4 -6 346.67 20.8
 -5 -4 -6 333.47 23.1
 5 4 6 343.57 24.5
 5 4 6 360.16 26.5
 5 4 6 335.97 25.4
 5 4 6 365.06 24.7
 5 4 6 363.36 22.8
 5 4 6 340.17 24.8
 5 4 6 350.06 22.8
 5 4 6 363.66 22.2
 5 4 6 339.87 23.2
 5 4 6 347.07 23.3
 -4 -4 -6 597.34 37.1
 -4 -4 -6 611.44 37.3
 -4 -4 -6 603.94 36
 -4 -4 -6 544.25 38.6
 -4 -4 -6 573.74 35.5
 -4 -4 -6 586.34 36.2
 -4 -4 -6 571.64 36.7
 -4 -4 -6 458.75 41.8
 -4 -4 -6 544.55 36.8
 4 4 6 624.24 36.2
 4 4 6 541.55 38.8
 4 4 6 551.64 37.4
 4 4 6 574.94 36
 4 4 6 572.24 36.4
 4 4 6 604.64 36.4
 4 4 6 551.74 36.2
 4 4 6 601.24 38.8
 4 4 6 613.04 38.5
 -3 -4 -6 3.7 3
 -3 -4 -6 1.8 2.2
 -3 -4 -6 -1.5 2.1
 -3 -4 -6 0.5 1.7
 -3 -4 -6 -2.5 2.4
 -3 -4 -6 0.2 2.3
 -3 -4 -6 -1.4 1.8
 -3 -4 -6 1.8 2.4
 -3 -4 -6 2.8 3.6
 3 4 6 -0.2 1.6
 3 4 6 1.5 3.3
 3 4 6 1.6 1.8
 3 4 6 1.7 2.1
 3 4 6 -1.5 2
 3 4 6 0.2 2.3
 3 4 6 -1.6 2.2
 3 4 6 -0.6 3.3
 3 4 6 3.2 2.6
 3 4 6 -2.7 1.5
 -2 -4 -6 399.56 25.7
 -2 -4 -6 372.66 25.2
 -2 -4 -6 366.36 24
 -2 -4 -6 334.07 25.4
 -2 -4 -6 365.36 25.2
 -2 -4 -6 376.76 25.1
 -2 -4 -6 313.77 28.5
 -2 -4 -6 381.36 23.7
 -2 -4 -6 387.96 23.6
 2 4 6 376.66 26.1
 2 4 6 390.06 25
 2 4 6 383.56 23.9
 2 4 6 399.96 23.7
 2 4 6 397.26 25.3
 2 4 6 364.46 25.8
 2 4 6 294.07 26.1
 2 4 6 386.46 25
 2 4 6 360.16 24.7
 2 4 6 375.26 23.9
 2 4 6 386.06 25.6
 -1 -4 -6 807.02 50.69
 -1 -4 -6 865.91 49.3
 -1 -4 -6 863.31 51.39
 -1 -4 -6 721.23 48.6
 -1 -4 -6 814.92 50.99
 -1 -4 -6 799.22 50.99
 -1 -4 -6 819.22 49.9
 -1 -4 -6 807.52 49.1
 -1 -4 -6 884.51 50.29
 -1 -4 -6 698.53 53.59
 -1 -4 -6 666.53 50.99
 1 4 6 823.42 49.6
 1 4 6 814.42 50.89
 1 4 6 886.81 48.4
 1 4 6 874.01 48.1
 1 4 6 800.32 51.39
 1 4 6 829.22 50.79
 1 4 6 801.92 49.2
 1 4 6 842.02 50.99
 1 4 6 834.82 50.59
 1 4 6 824.72 49.1
 1 4 6 830.72 50.59
 1 4 6 706.43 50.79
 1 4 6 804.92 50.59
 0 -4 -6 14.6 3.6
 0 -4 -6 9 3.5
 0 -4 -6 11.1 3.6
 0 -4 -6 14 3.8
 0 -4 -6 8.4 2.8
 0 -4 -6 11.4 2.9
 0 -4 -6 15.3 4.9
 0 -4 -6 11 3.7
 0 -4 -6 8.9 2.9
 0 -4 -6 13.9 4
 0 -4 -6 11.5 4.2
 0 4 6 10.1 2.7
 0 4 6 10.6 3.9
 0 4 6 9.3 3.5
 0 4 6 15.2 4.2
 0 4 6 13.4 2.8
 0 4 6 8.2 3.4
 0 4 6 9.5 3.1
 0 4 6 5.1 4
 0 4 6 12.1 3.7
 0 4 6 7.5 3.2
 0 4 6 14 2.4
 0 4 6 11 2.7
 0 4 6 9.6 2.9
 1 -4 -6 222.88 15.9
 1 -4 -6 222.88 16.8
 1 -4 -6 209.58 15.5
 1 -4 -6 212.68 15.3
 1 -4 -6 186.48 15.1
 1 -4 -6 191.58 15
 1 -4 -6 221.68 17.1
 1 -4 -6 216.48 16.3
 1 -4 -6 213.48 15.6
 1 -4 -6 204.78 16.4
 1 -4 -6 212.48 15.9
 -1 4 6 229.38 14.7
 -1 4 6 199.78 14.8
 -1 4 6 205.98 14.3
 -1 4 6 180.48 17.2
 -1 4 6 236.78 16.3
 -1 4 6 206.28 15.1
 -1 4 6 209.08 14.1
 -1 4 6 201.48 16
 -1 4 6 213.78 15.9
 -1 4 6 191.28 14.2
 -1 4 6 222.38 16.1
 -1 4 6 220.68 16.2
 2 -4 -6 343.57 25.4
 2 -4 -6 415.66 25.7
 2 -4 -6 371.66 25.3
 2 -4 -6 374.66 24.8
 2 -4 -6 352.66 24.2
 2 -4 -6 388.96 26.8
 2 -4 -6 377.06 25.6
 2 -4 -6 369.76 24.3
 2 -4 -6 398.46 24.1
 2 -4 -6 337.47 24.9
 2 -4 -6 385.76 25.3
 -2 4 6 366.96 24.5
 -2 4 6 360.36 23.4
 -2 4 6 374.16 25.3
 -2 4 6 386.46 23.5
 -2 4 6 361.46 24
 -2 4 6 346.07 24.8
 -2 4 6 303.37 24.1
 -2 4 6 318.37 26
 -2 4 6 350.76 24.6
 -2 4 6 360.36 25.4
 -2 4 6 376.86 25.3
 -2 4 6 385.26 25.4
 3 -4 -6 53.89 7.5
 3 -4 -6 55.89 6
 3 -4 -6 66.19 10.2
 3 -4 -6 54.49 7.7
 3 -4 -6 51.89 6.7
 3 -4 -6 54.29 6.5
 3 -4 -6 71.49 9.1
 3 -4 -6 44.9 6.7
 3 -4 -6 52.59 6.4
 3 -4 -6 45.4 7.3
 3 -4 -6 53.09 7
 3 -4 -6 62.99 8.5
 -3 4 6 52.59 8
 -3 4 6 56.59 7.1
 -3 4 6 57.49 7.3
 -3 4 6 44.5 7.3
 -3 4 6 52.89 7.8
 -3 4 6 48.9 7.1
 -3 4 6 64.89 8.2
 -3 4 6 59.69 7.4
 -3 4 6 47.8 6.1
 -3 4 6 48.3 7.4
 4 -4 -6 32.4 6.7
 4 -4 -6 44.1 6.8
 4 -4 -6 30.3 8.4
 4 -4 -6 39.9 7.1
 4 -4 -6 38.2 7.3
 4 -4 -6 49.7 7.4
 4 -4 -6 46.4 5.5
 4 -4 -6 45.1 6.1
 4 -4 -6 44.8 7.6
 4 -4 -6 47.3 6.5
 4 -4 -6 53.39 6.9
 -4 4 6 60.89 7.2
 -4 4 6 50.19 7.5
 -4 4 6 46.8 7.3
 -4 4 6 39.7 5.7
 -4 4 6 41.5 7.3
 -4 4 6 59.69 7.6
 -4 4 6 51.09 7.7
 -4 4 6 50.49 7.6
 -4 4 6 35 6.4
 5 -4 -6 146.29 16.3
 5 -4 -6 147.19 13.4
 5 -4 -6 173.48 12.8
 5 -4 -6 158.88 13.3
 5 -4 -6 166.88 15.3
 5 -4 -6 162.68 13.2
 5 -4 -6 138.49 13.4
 5 -4 -6 145.39 12.3
 5 -4 -6 164.18 14.3
 5 -4 -6 163.38 10.9
 -5 4 6 131.99 12.8
 -5 4 6 158.68 14.2
 -5 4 6 152.58 14.4
 -5 4 6 157.68 13.8
 -5 4 6 143.09 13.9
 -5 4 6 150.18 13.5
 -5 4 6 140.29 13.1
 -5 4 6 159.08 12.4
 -5 4 6 166.98 12.1
 6 -4 -6 -1.5 3.6
 6 -4 -6 4.7 3.4
 6 -4 -6 0 2.6
 6 -4 -6 2.6 5.3
 6 -4 -6 1 1.4
 6 -4 -6 -3.6 2.9
 6 -4 -6 -1.2 3.1
 6 -4 -6 -0.1 4.4
 6 -4 -6 -1.9 2.9
 -6 4 6 0.1 3.6
 -6 4 6 0.9 3.4
 -6 4 6 2.9 3.6
 -6 4 6 -1.9 2.8
 -6 4 6 0.1 3.8
 -6 4 6 2.4 2.5
 -6 4 6 -0.6 2.5
 -6 4 6 -1.7 2.5
 -6 4 6 -0.7 3
 7 -4 -6 4 5.5
 7 -4 -6 3.3 2.8
 7 -4 -6 6.5 7.2
 7 -4 -6 0.8 3.9
 7 -4 -6 11.8 5.1
 7 -4 -6 6.6 3.8
 7 -4 -6 5.1 3.7
 7 -4 -6 5.9 5
 -7 4 6 4.7 4.5
 -7 4 6 10 4.6
 -7 4 6 4.5 3.7
 -7 4 6 3.5 4.2
 -7 4 6 2 4.1
 -7 4 6 -1.6 3.4
 -7 4 6 1.6 4.3
 8 -4 -6 62.59 11.3
 8 -4 -6 69.59 11.5
 8 -4 -6 52.19 9.4
 8 -4 -6 55.49 7.3
 8 -4 -6 45.2 12.2
 8 -4 -6 44.9 7.7
 8 -4 -6 55.79 9.7
 -8 4 6 61.79 9.1
 -8 4 6 63.99 9.2
 -8 4 6 60.09 9.6
 -8 4 6 59.19 10.5
 -8 4 6 45.9 9.1
 -8 4 6 58.29 9.6
 9 -4 -6 -0.4 6.2
 9 -4 -6 -1.9 3.7
 9 -4 -6 17.7 9.8
 9 -4 -6 3.3 4.4
 9 -4 -6 2.1 5.2
 -9 4 6 5.4 4.5
 -9 4 6 4.7 4.6
 -9 4 6 3.3 3.8
 -9 4 6 -1.4 4.2
 10 -4 -6 12.6 6.4
 10 -4 -6 7.8 8.5
 10 -4 -6 9.9 7.4
 10 -4 -6 8.2 6
 -10 4 6 15.9 5.3
 -10 4 6 3.4 5.5
 -10 4 6 10.9 6
 -10 4 6 4.6 4.4
 11 -4 -6 126.19 19.3
 11 -4 -6 132.69 23.3
 11 -4 -6 155.38 19
 -11 4 6 154.48 15.3
 -11 4 6 144.69 17.6
 -11 4 6 143.49 18.2
 -11 4 6 180.38 16.3
 12 -4 -6 9.3 10.5
 12 -4 -6 -0.9 6.2
 12 -4 -6 7.2 6.7
 -12 4 6 8 5
 -12 4 6 6.4 4.2
 -12 4 6 1.5 5.7
 -12 4 6 7.3 6.5
 -14 -3 -5 3.1 6
 -14 -3 -5 0.4 5.3
 -14 -3 -5 0.5 3.5
 14 3 5 1.5 6.8
 14 3 5 -0.1 7.7
 14 3 5 7.3 7.8
 -13 -3 -5 14.1 7.8
 -13 -3 -5 9.6 4.3
 -13 -3 -5 6.4 7.4
 -13 -3 -5 3.3 4.1
 13 3 5 22.9 9.3
 13 3 5 11 7.2
 13 3 5 10.6 8.9
 13 3 5 5.3 6.5
 -12 -3 -5 9.1 5.8
 -12 -3 -5 19.2 4.8
 -12 -3 -5 7.9 4.5
 -12 -3 -5 15.1 6.6
 12 3 5 22.5 9.1
 12 3 5 8.3 6.9
 12 3 5 12.6 6.8
 12 3 5 13.5 7.3
 12 3 5 13.4 8.5
 -11 -3 -5 65.29 7.9
 -11 -3 -5 59.89 10.3
 -11 -3 -5 45.9 7.9
 -11 -3 -5 61.39 7.4
 -11 -3 -5 54.49 9.2
 11 3 5 46.3 9.5
 11 3 5 58.39 11.5
 11 3 5 71.29 16.4
 11 3 5 46.3 12.4
 11 3 5 48.8 8.1
 11 3 5 56.19 11.8
 11 3 5 56.09 11.2
 -10 -3 -5 117.29 10
 -10 -3 -5 115.69 9.9
 -10 -3 -5 103.79 10.5
 -10 -3 -5 119.99 11.9
 -10 -3 -5 118.69 10.1
 -10 -3 -5 110.29 9.7
 -10 -3 -5 107.09 11.6
 -10 -3 -5 109.59 12.3
 10 3 5 106.59 14.7
 10 3 5 112.39 17.5
 10 3 5 141.09 17.8
 10 3 5 98.69 14.3
 10 3 5 99.39 12
 10 3 5 129.79 14.4
 10 3 5 103.09 11.6
 -9 -3 -5 228.38 22.1
 -9 -3 -5 239.18 17.1
 -9 -3 -5 252.37 19
 -9 -3 -5 241.98 17.1
 -9 -3 -5 252.77 17.1
 -9 -3 -5 259.87 17.9
 -9 -3 -5 211.08 16.8
 -9 -3 -5 256.87 18.7
 -9 -3 -5 231.18 19.4
 9 3 5 256.37 18.9
 9 3 5 227.88 20.7
 9 3 5 242.58 18.6
 9 3 5 237.58 21
 9 3 5 244.38 19
 9 3 5 226.58 19.1
 9 3 5 248.38 23.1
 9 3 5 218.08 21.2
 -8 -3 -5 5.2 4.3
 -8 -3 -5 5.9 2.8
 -8 -3 -5 4.7 2.9
 -8 -3 -5 5.9 2.8
 -8 -3 -5 3.7 2.6
 -8 -3 -5 2.8 3.9
 -8 -3 -5 6.4 2.6
 -8 -3 -5 1 2.9
 -8 -3 -5 1.1 2.1
 8 3 5 5.8 4.6
 8 3 5 4.1 4.6
 8 3 5 3 3.7
 8 3 5 3.7 4.2
 8 3 5 1.4 4.1
 8 3 5 5.5 3
 8 3 5 6.8 6.1
 8 3 5 6.5 3.1
 8 3 5 2.5 3.1
 -7 -3 -5 11.4 3.5
 -7 -3 -5 11.6 3.3
 -7 -3 -5 9.9 3
 -7 -3 -5 10.3 3
 -7 -3 -5 7.3 3.7
 -7 -3 -5 12.3 4.9
 -7 -3 -5 11.1 3.1
 -7 -3 -5 12 3.7
 -7 -3 -5 6.3 2.7
 7 3 5 9.2 3.2
 7 3 5 15.5 3.9
 7 3 5 5.9 4
 7 3 5 9.6 3.9
 7 3 5 11.1 4.8
 7 3 5 20.2 5
 7 3 5 11 4
 7 3 5 14 4.7
 7 3 5 14.1 5.9
 -6 -3 -5 146.49 10.8
 -6 -3 -5 144.69 9.9
 -6 -3 -5 141.99 10.7
 -6 -3 -5 138.39 10.5
 -6 -3 -5 135.09 10.6
 -6 -3 -5 138.19 13.6
 -6 -3 -5 132.89 11.3
 -6 -3 -5 123.79 10.1
 -6 -3 -5 135.59 11.2
 6 3 5 142.39 11.4
 6 3 5 136.39 12.2
 6 3 5 138.39 12.4
 6 3 5 151.38 10.7
 6 3 5 128.69 9
 6 3 5 133.89 12.3
 6 3 5 128.69 15.8
 6 3 5 112.39 12.4
 6 3 5 127.49 9.6
 6 3 5 141.09 11.4
 6 3 5 129.09 10.7
 -5 -3 -5 3.3 2.3
 -5 -3 -5 1.1 1.8
 -5 -3 -5 2.8 1.8
 -5 -3 -5 6.3 1.8
 -5 -3 -5 3.6 3.1
 -5 -3 -5 2 2.3
 -5 -3 -5 4.2 2.5
 -5 -3 -5 4.4 2.4
 -5 -3 -5 2 2.1
 5 3 5 7.1 3.1
 5 3 5 1.1 1.7
 5 3 5 1.2 3.5
 5 3 5 3.6 2.8
 5 3 5 -1.6 2.3
 5 3 5 0.7 2.4
 5 3 5 3 2.2
 5 3 5 6.4 2.7
 5 3 5 5.1 1.9
 5 3 5 6.6 2.3
 5 3 5 7.3 3
 -4 -3 -5 6.8 2
 -4 -3 -5 5.4 2.4
 -4 -3 -5 5.2 1.3
 -4 -3 -5 3.9 1.4
 -4 -3 -5 1.7 2.3
 -4 -3 -5 4.1 2.3
 -4 -3 -5 9 3
 -4 -3 -5 10.9 3.2
 -4 -3 -5 5.8 3.3
 -4 -3 -5 7.4 2.8
 4 3 5 5.2 2.1
 4 3 5 7.1 3.6
 4 3 5 4.4 2.5
 4 3 5 3.9 2.3
 4 3 5 8.1 2.7
 4 3 5 5.5 3.1
 4 3 5 5.4 2
 4 3 5 9.3 3.5
 4 3 5 -0.6 2.2
 4 3 5 8.7 4.2
 -3 -3 -5 228.58 16.2
 -3 -3 -5 217.68 17.2
 -3 -3 -5 225.28 16.1
 -3 -3 -5 226.38 15.2
 -3 -3 -5 242.48 16.4
 -3 -3 -5 233.38 16
 -3 -3 -5 235.78 14.9
 -3 -3 -5 232.08 15.4
 3 3 5 228.48 16.4
 3 3 5 225.48 15.5
 3 3 5 241.98 15.1
 3 3 5 225.28 15.5
 3 3 5 221.18 15.4
 3 3 5 222.48 17.7
 3 3 5 216.78 17
 3 3 5 196.58 16.9
 3 3 5 234.48 15.5
 3 3 5 224.98 15.8
 3 3 5 222.38 17
 -2 -3 -5 377.56 23.7
 -2 -3 -5 279.47 26.2
 -2 -3 -5 350.26 23.2
 -2 -3 -5 340.87 23.2
 -2 -3 -5 355.46 22.2
 -2 -3 -5 366.26 22.1
 -2 -3 -5 347.57 22.2
 -2 -3 -5 326.17 23.8
 -2 -3 -5 332.27 23.3
 2 3 5 377.26 23.9
 2 3 5 286.07 22.4
 2 3 5 365.36 23.3
 2 3 5 380.96 23.3
 2 3 5 382.86 22.3
 2 3 5 367.36 24.2
 2 3 5 352.46 24.2
 2 3 5 354.36 22.3
 2 3 5 360.76 22.1
 2 3 5 342.27 23
 -1 -3 -5 1389.06 81.79
 -1 -3 -5 1325.57 81.59
 -1 -3 -5 1307.47 81.39
 -1 -3 -5 1314.17 81.19
 -1 -3 -5 1316.07 80.39
 -1 -3 -5 1392.26 80.09
 -1 -3 -5 1360.16 81.49
 -1 -3 -5 1395.26 80.09
 1 3 5 1382.56 79.99
 1 3 5 1438.36 81.39
 1 3 5 1293.77 81.79
 1 3 5 1349.47 79.09
 1 3 5 1347.07 81.19
 1 3 5 1317.77 80.19
 1 3 5 1363.76 81.39
 1 3 5 1376.66 81.49
 1 3 5 1338.17 80.09
 1 3 5 1325.17 81.59
 1 3 5 1325.27 81.09
 1 3 5 1185.48 81.49
 1 3 5 1346.97 79.19
 0 -3 -5 1595.54 106.29
 0 -3 -5 1727.43 103.99
 0 -3 -5 1630.84 103.39
 0 -3 -5 1776.32 103.99
 0 -3 -5 1858.41 104.69
 0 -3 -5 1827.72 104.49
 0 -3 -5 1646.44 104.79
 0 -3 -5 1741.83 104.69
 0 -3 -5 1832.42 103.29
 0 -3 -5 1774.02 105.09
 0 3 5 1675.13 103.19
 0 3 5 1860.11 104.89
 0 3 5 1727.73 104.79
 0 3 5 1628.64 102.89
 0 3 5 1761.82 104.69
 0 3 5 1710.63 104.59
 0 3 5 1597.34 104.79
 0 3 5 1813.42 103.89
 0 3 5 1711.53 104.69
 0 3 5 1809.12 103.29
 0 3 5 1844.02 103.29
 1 -3 -5 349.27 22.6
 1 -3 -5 371.96 23.5
 1 -3 -5 386.66 24.2
 1 -3 -5 376.76 24.2
 1 -3 -5 313.77 22.6
 1 -3 -5 316.87 22.7
 1 -3 -5 282.47 22.4
 1 -3 -5 386.46 23.5
 1 -3 -5 340.47 23.6
 1 -3 -5 359.56 22.7
 1 -3 -5 378.86 23.1
 -1 3 5 307.07 21.9
 -1 3 5 378.86 23.6
 -1 3 5 352.56 21.8
 -1 3 5 334.27 22
 -1 3 5 369.66 23.3
 -1 3 5 298.07 22.3
 -1 3 5 393.86 23.6
 -1 3 5 351.76 23.5
 -1 3 5 350.86 22.6
 -1 3 5 303.57 24.2
 -1 3 5 366.76 23.5
 -1 3 5 338.07 23.3
 2 -3 -5 20.6 3.3
 2 -3 -5 19.9 5.4
 2 -3 -5 13.3 3.5
 2 -3 -5 15.8 3.6
 2 -3 -5 22.4 4.2
 2 -3 -5 8.1 3.3
 2 -3 -5 14.7 4
 2 -3 -5 17.6 3.6
 2 -3 -5 20.7 3.6
 2 -3 -5 12 3.4
 2 -3 -5 15.4 3.9
 -2 3 5 16.6 3.7
 -2 3 5 22.3 4.1
 -2 3 5 18.2 4
 -2 3 5 16.8 4.1
 -2 3 5 17.3 4
 -2 3 5 18.4 3.5
 -2 3 5 15.8 3.2
 -2 3 5 14.6 4
 -2 3 5 17.6 3.8
 -2 3 5 19.7 4.4
 -2 3 5 14.5 3.9
 3 -3 -5 53.89 6.7
 3 -3 -5 60.99 8
 3 -3 -5 64.49 8
 3 -3 -5 46.2 7.3
 3 -3 -5 73.89 7
 3 -3 -5 86.29 9.3
 3 -3 -5 67.59 6.9
 3 -3 -5 74.09 10.5
 3 -3 -5 73.09 6.4
 3 -3 -5 66.59 6.1
 3 -3 -5 67.69 8.2
 -3 3 5 63.79 8
 -3 3 5 70.19 6.8
 -3 3 5 63.29 7.4
 -3 3 5 70.49 7.6
 -3 3 5 73.59 8.3
 -3 3 5 67.09 6.2
 -3 3 5 54.29 6.9
 -3 3 5 59.59 6.3
 -3 3 5 57.49 7.8
 -3 3 5 75.49 7.5
 -3 3 5 62.29 7.2
 4 -3 -5 212.48 15.5
 4 -3 -5 208.38 17.3
 4 -3 -5 175.88 14.4
 4 -3 -5 206.58 14.5
 4 -3 -5 187.58 14.1
 4 -3 -5 174.58 14
 4 -3 -5 181.48 13.1
 4 -3 -5 155.88 15
 4 -3 -5 191.38 13.7
 4 -3 -5 198.58 12.6
 -4 3 5 175.98 15
 -4 3 5 192.58 14.6
 -4 3 5 171.08 14.6
 -4 3 5 200.38 14.7
 -4 3 5 181.78 13.1
 -4 3 5 194.28 14.5
 -4 3 5 171.78 14.2
 -4 3 5 191.88 13.6
 -4 3 5 152.68 13.8
 -4 3 5 198.48 14.6
 -4 3 5 168.88 13.1
 5 -3 -5 35.8 6
 5 -3 -5 37.3 6.6
 5 -3 -5 33.1 7.1
 5 -3 -5 25.6 7.6
 5 -3 -5 38.3 5.8
 5 -3 -5 35 6.4
 5 -3 -5 38.8 3.8
 5 -3 -5 31.1 5.8
 5 -3 -5 43.7 5.6
 -5 3 5 44.8 6.8
 -5 3 5 33.8 6.1
 -5 3 5 44.8 5.7
 -5 3 5 32.1 6.2
 -5 3 5 38 4.9
 -5 3 5 38.1 5
 -5 3 5 44 7.4
 -5 3 5 36.3 5.8
 -5 3 5 43.1 6.6
 -5 3 5 46.2 6.8
 -5 3 5 42 6.6
 6 -3 -5 54.89 11.1
 6 -3 -5 39.9 8.6
 6 -3 -5 41.2 4.1
 6 -3 -5 57.19 8.3
 6 -3 -5 51.29 8.4
 6 -3 -5 60.99 6.9
 6 -3 -5 51.29 6.8
 6 -3 -5 64.59 9.2
 6 -3 -5 49 7.2
 -6 3 5 52.29 8.1
 -6 3 5 45.4 7
 -6 3 5 60.39 8.2
 -6 3 5 45.4 7.1
 -6 3 5 43.6 7.4
 -6 3 5 62.59 8
 -6 3 5 48.3 8.3
 -6 3 5 49.6 6.2
 -6 3 5 59.69 7.1
 -6 3 5 56.69 7.8
 -6 3 5 45.6 4.6
 7 -3 -5 0.6 5.7
 7 -3 -5 -0.2 4.8
 7 -3 -5 -3.6 2.1
 7 -3 -5 1.4 4.1
 7 -3 -5 -0.5 3.8
 7 -3 -5 -3.5 2.2
 7 -3 -5 -1.2 2.6
 7 -3 -5 5 3.7
 7 -3 -5 8.3 4.2
 -7 3 5 -2.2 3.7
 -7 3 5 1.5 2.9
 -7 3 5 -1.5 2.7
 -7 3 5 -0.5 2.4
 -7 3 5 -1.7 2.9
 -7 3 5 -0.3 3.7
 -7 3 5 -4.1 2.3
 -7 3 5 0.9 3.4
 -7 3 5 2.6 3.2
 -7 3 5 3.8 3.4
 8 -3 -5 11.8 5.5
 8 -3 -5 15.1 3.7
 8 -3 -5 16 5.7
 8 -3 -5 2.3 4.6
 8 -3 -5 10.1 4.8
 8 -3 -5 9.6 8
 8 -3 -5 6.4 3.2
 -8 3 5 8 5
 -8 3 5 -0.5 3.2
 -8 3 5 13 6.9
 -8 3 5 9 3.7
 -8 3 5 1.5 3.9
 -8 3 5 13.3 5.3
 -8 3 5 11.1 5.3
 -8 3 5 12.2 4.7
 9 -3 -5 22.4 6.5
 9 -3 -5 14.8 3.9
 9 -3 -5 6.7 7.7
 9 -3 -5 9.4 4.7
 9 -3 -5 11.3 7
 9 -3 -5 19.3 5.2
 9 -3 -5 9.4 5.5
 -9 3 5 20.2 10.4
 -9 3 5 10.7 4.4
 -9 3 5 6 4.5
 -9 3 5 11.7 4.1
 -9 3 5 8.6 4.2
 -9 3 5 15.2 5.5
 -9 3 5 14.1 6.7
 10 -3 -5 10.4 8.6
 10 -3 -5 1.7 5.1
 10 -3 -5 1.8 5.3
 10 -3 -5 -1.8 4.2
 10 -3 -5 3.7 6.2
 -10 3 5 -0.1 2.7
 -10 3 5 -5.2 4.1
 -10 3 5 1.8 4.3
 -10 3 5 2.5 3.5
 11 -3 -5 15.3 7.3
 11 -3 -5 9.4 7.3
 11 -3 -5 -2.5 7.3
 11 -3 -5 16.8 6.9
 -11 3 5 10.3 4.6
 -11 3 5 16.4 5.7
 -11 3 5 14.3 7
 -11 3 5 3.4 5.4
 12 -3 -5 41.9 12.7
 12 -3 -5 41.7 14.6
 12 -3 -5 41.8 11.4
 12 -3 -5 66.79 12.8
 -12 3 5 56.59 9
 -12 3 5 51.09 11.2
 -12 3 5 48.2 10
 -12 3 5 54.49 8.8
 -14 -2 -4 23.1 5.5
 -14 -2 -4 41.3 9
 -14 -2 -4 36.9 10.3
 14 2 4 20.8 10.1
 14 2 4 43 13.6
 14 2 4 45.1 11.1
 -13 -2 -4 17.2 7.8
 -13 -2 -4 17.2 6.2
 -13 -2 -4 13.6 4.3
 13 2 4 15.5 8.6
 13 2 4 20.7 8.6
 13 2 4 7 7.3
 13 2 4 10.6 8.3
 -12 -2 -4 21 6
 -12 -2 -4 11.3 6
 -12 -2 -4 11.4 3.9
 -12 -2 -4 26.2 8.2
 12 2 4 2.4 7
 12 2 4 7.9 7.2
 12 2 4 12.1 7.6
 12 2 4 15.3 8
 12 2 4 -1 5.3
 -11 -2 -4 27.3 5
 -11 -2 -4 30.5 5.6
 -11 -2 -4 31.9 6.4
 -11 -2 -4 25.3 4.8
 -11 -2 -4 12.6 6
 -11 -2 -4 15.2 5.7
 11 2 4 25.8 7.4
 11 2 4 14.4 6.9
 11 2 4 13.3 7
 11 2 4 6.6 6.2
 11 2 4 32.2 11.2
 -10 -2 -4 41.7 5.9
 -10 -2 -4 38.5 6.9
 -10 -2 -4 44.4 6
 -10 -2 -4 46.1 6.2
 -10 -2 -4 46.8 8.8
 -10 -2 -4 35.7 7
 -10 -2 -4 40.9 7.9
 -10 -2 -4 39.6 6
 -10 -2 -4 46.2 5.8
 10 2 4 54.09 8.5
 10 2 4 31.8 8.3
 10 2 4 57.39 12.1
 10 2 4 33.9 6
 10 2 4 49.99 9.2
 10 2 4 44.8 10.2
 10 2 4 32.6 7.7
 10 2 4 46.3 10
 10 2 4 41 8.9
 -9 -2 -4 151.58 13.4
 -9 -2 -4 141.69 11.4
 -9 -2 -4 137.39 11.4
 -9 -2 -4 165.48 14
 -9 -2 -4 149.69 11.4
 -9 -2 -4 148.79 11.4
 -9 -2 -4 133.79 10.8
 -9 -2 -4 172.98 14.7
 -9 -2 -4 158.68 12.8
 -9 -2 -4 149.59 11.7
 9 2 4 153.08 13.8
 9 2 4 128.49 14.1
 9 2 4 142.99 14.1
 9 2 4 153.58 16
 9 2 4 162.78 14.5
 9 2 4 148.29 19.5
 9 2 4 133.19 12.2
 9 2 4 130.09 16.6
 9 2 4 141.89 14
 -8 -2 -4 483.65 32.1
 -8 -2 -4 476.55 30.5
 -8 -2 -4 447.66 29.8
 -8 -2 -4 490.85 30.3
 -8 -2 -4 468.65 32
 -8 -2 -4 483.65 31.3
 -8 -2 -4 483.45 32.7
 -8 -2 -4 482.45 30.4
 -8 -2 -4 480.95 30.3
 8 2 4 448.26 31.3
 8 2 4 439.36 33.4
 8 2 4 493.65 32.4
 8 2 4 470.05 35.9
 8 2 4 490.55 32.8
 8 2 4 499.35 32.8
 8 2 4 477.95 34.1
 8 2 4 442.66 32.5
 8 2 4 503.15 35
 -7 -2 -4 8.8 2.7
 -7 -2 -4 15 3.1
 -7 -2 -4 17.9 4.8
 -7 -2 -4 15.5 3.1
 -7 -2 -4 10.3 3.5
 -7 -2 -4 14.3 3.7
 -7 -2 -4 10.8 2.8
 -7 -2 -4 9.9 3.1
 -7 -2 -4 9.4 2.8
 7 2 4 7.9 5.4
 7 2 4 9.8 4.2
 7 2 4 15 4.6
 7 2 4 7.7 3.9
 7 2 4 13.2 4.1
 7 2 4 5.7 3
 7 2 4 16.4 4.2
 7 2 4 13.9 4.8
 7 2 4 15.8 5
 7 2 4 16.9 4.3
 -6 -2 -4 2.3 1.8
 -6 -2 -4 2.9 2
 -6 -2 -4 7.2 2.9
 -6 -2 -4 0.8 1.8
 -6 -2 -4 -0.7 1.7
 -6 -2 -4 1.8 2.1
 -6 -2 -4 2.6 1.8
 -6 -2 -4 2.4 2.7
 6 2 4 1.5 2.1
 6 2 4 1.1 2.4
 6 2 4 -1.6 3.4
 6 2 4 0.8 2.6
 6 2 4 -0.2 2.1
 6 2 4 3.5 2.1
 6 2 4 -0.5 0.7
 6 2 4 2.3 2.5
 6 2 4 0.5 2.5
 6 2 4 3.2 1.3
 6 2 4 6 3.9
 6 2 4 0 2.6
 -5 -2 -4 153.68 11.5
 -5 -2 -4 150.48 11.6
 -5 -2 -4 173.08 12.4
 -5 -2 -4 168.08 11.8
 -5 -2 -4 165.78 11.7
 -5 -2 -4 181.78 12.7
 -5 -2 -4 165.08 11.7
 -5 -2 -4 177.38 11.4
 -5 -2 -4 138.19 13.8
 5 2 4 160.88 13.3
 5 2 4 168.58 12.5
 5 2 4 170.98 13.4
 5 2 4 156.28 12.6
 5 2 4 167.48 12.5
 5 2 4 153.48 10.9
 5 2 4 160.78 11
 5 2 4 173.58 12.2
 5 2 4 159.68 13.8
 5 2 4 166.78 11.7
 5 2 4 168.58 13
 5 2 4 140.79 11.8
 5 2 4 175.88 11.6
 5 2 4 152.88 14.6
 -4 -2 -4 431.06 27.2
 -4 -2 -4 444.66 28
 -4 -2 -4 433.16 27.8
 -4 -2 -4 391.56 29.7
 -4 -2 -4 451.45 26.9
 -4 -2 -4 447.46 28.1
 -4 -2 -4 442.86 28.2
 -4 -2 -4 448.66 28
 -4 -2 -4 419.16 27.8
 4 2 4 473.45 28.3
 4 2 4 467.65 27.4
 4 2 4 462.15 29.3
 4 2 4 442.66 28.4
 4 2 4 427.66 27.5
 4 2 4 435.56 27.9
 4 2 4 409.96 28.9
 4 2 4 454.25 29.1
 4 2 4 439.26 27.4
 4 2 4 458.75 27.1
 4 2 4 450.15 29.9
 4 2 4 415.86 30.5
 4 2 4 445.86 28.2
 -3 -2 -4 169.28 11.9
 -3 -2 -4 155.88 11.8
 -3 -2 -4 165.58 11.5
 -3 -2 -4 162.78 10.7
 -3 -2 -4 158.58 11.4
 -3 -2 -4 170.88 12
 -3 -2 -4 162.88 10.3
 -3 -2 -4 144.29 11.5
 -3 -2 -4 166.28 10.2
 -3 -2 -4 151.48 13
 3 2 4 175.48 12.5
 3 2 4 144.09 10.5
 3 2 4 168.78 13.8
 3 2 4 164.98 11.5
 3 2 4 170.18 11.7
 3 2 4 173.58 11
 3 2 4 160.18 11.8
 3 2 4 166.38 12.4
 3 2 4 176.28 12.8
 3 2 4 171.38 11.7
 3 2 4 172.48 11.3
 3 2 4 170.88 13.1
 -2 -2 -4 381.96 23.9
 -2 -2 -4 398.46 24.9
 -2 -2 -4 403.56 24.8
 -2 -2 -4 390.16 23.6
 -2 -2 -4 385.46 24.6
 -2 -2 -4 329.37 25
 -2 -2 -4 389.66 23.9
 -2 -2 -4 365.36 24.5
 2 2 4 384.46 25.2
 2 2 4 390.06 24
 2 2 4 365.16 24.3
 2 2 4 398.46 24.7
 2 2 4 397.46 24
 2 2 4 376.86 24.6
 2 2 4 377.66 25.2
 2 2 4 388.76 25.9
 2 2 4 383.26 24.5
 2 2 4 413.46 24.5
 2 2 4 344.67 25.3
 -1 -2 -4 1090.59 64.59
 -1 -2 -4 999.3 64.49
 -1 -2 -4 1074.49 63.39
 -1 -2 -4 1032.7 64.29
 -1 -2 -4 1064.39 63.59
 -1 -2 -4 1114.79 64.69
 -1 -2 -4 1089.29 63.39
 -1 -2 -4 1068.79 64.49
 1 2 4 934.41 64.49
 1 2 4 1046.5 64.19
 1 2 4 1053.29 64.49
 1 2 4 1020.6 64.69
 1 2 4 1083.59 63.39
 1 2 4 1043.6 63.39
 1 2 4 1067.49 63.49
 1 2 4 1080.59 64.39
 1 2 4 1117.69 64.49
 1 2 4 1086.79 64.89
 1 2 4 1131.69 64.09
 0 -2 -4 2850.41 160.38
 0 -2 -4 2668.03 159.78
 0 -2 -4 2464.45 160.18
 0 -2 -4 2766.72 160.38
 0 -2 -4 2807.22 160.78
 0 -2 -4 2824.12 159.48
 0 -2 -4 2376.16 161.58
 0 -2 -4 2318.87 159.58
 0 -2 -4 2755.72 160.58
 0 -2 -4 2896.81 160.38
 0 -2 -4 2848.62 160.68
 0 -2 -4 2890.21 159.28
 0 2 4 2817.72 160.48
 0 2 4 2764.92 160.48
 0 2 4 2714.53 160.08
 0 2 4 2488.65 159.58
 0 2 4 2865.41 159.38
 0 2 4 2774.22 160.58
 0 2 4 2987.8 159.48
 0 2 4 2747.33 160.38
 0 2 4 2455.05 158.98
 0 2 4 2565.44 160.48
 0 2 4 2569.24 159.28
 1 -2 -4 751.32 47.7
 1 -2 -4 741.53 47.3
 1 -2 -4 761.82 48.3
 1 -2 -4 850.11 48.7
 1 -2 -4 782.92 48.4
 1 -2 -4 756.52 47.8
 1 -2 -4 829.72 48.3
 1 -2 -4 740.13 47.7
 1 -2 -4 890.91 48
 1 -2 -4 827.62 47.7
 1 -2 -4 821.22 48.2
 -1 2 4 755.82 47.5
 -1 2 4 650.53 48.4
 -1 2 4 863.61 48.1
 -1 2 4 814.52 48.3
 -1 2 4 780.62 48.3
 -1 2 4 776.22 48.2
 -1 2 4 806.82 47.7
 -1 2 4 816.52 47
 -1 2 4 698.53 47.1
 -1 2 4 746.83 47.6
 -1 2 4 740.53 48
 -1 2 4 815.32 48.3
 2 -2 -4 31 5
 2 -2 -4 33.4 5.1
 2 -2 -4 46.1 4.8
 2 -2 -4 31.1 5.2
 2 -2 -4 30.9 4.8
 2 -2 -4 29.6 4.8
 2 -2 -4 35 5.2
 2 -2 -4 36.9 4.4
 2 -2 -4 42.2 3.9
 2 -2 -4 40.5 4.4
 2 -2 -4 40.6 4.9
 2 -2 -4 45.2 7
 -2 2 4 38.3 5.4
 -2 2 4 31.8 4.4
 -2 2 4 40.3 5.3
 -2 2 4 30.3 4.8
 -2 2 4 43.7 5.5
 -2 2 4 31.6 3.9
 -2 2 4 41.3 4.8
 -2 2 4 41.4 5.1
 -2 2 4 36.5 4.7
 -2 2 4 41.2 4.8
 -2 2 4 30.6 4.6
 -2 2 4 27.8 4.5
 3 -2 -4 792.52 48.6
 3 -2 -4 732.23 46.1
 3 -2 -4 789.22 45.1
 3 -2 -4 722.93 47.2
 3 -2 -4 715.93 46.3
 3 -2 -4 695.23 45.6
 3 -2 -4 731.13 46.5
 3 -2 -4 797.72 47.1
 3 -2 -4 751.02 45
 3 -2 -4 783.62 45.7
 -3 2 4 759.92 46.7
 -3 2 4 705.73 45.5
 -3 2 4 766.32 46.4
 -3 2 4 717.73 47
 -3 2 4 771.42 46.3
 -3 2 4 758.32 45.6
 -3 2 4 729.33 46.4
 -3 2 4 802.52 45.2
 -3 2 4 822.42 46.2
 -3 2 4 719.83 46.3
 -3 2 4 649.24 45.9
 -3 2 4 670.03 46.1
 4 -2 -4 229.38 15.8
 4 -2 -4 217.18 15.8
 4 -2 -4 211.28 15.5
 4 -2 -4 182.68 14.9
 4 -2 -4 220.38 18.1
 4 -2 -4 229.78 16.5
 4 -2 -4 223.08 14.9
 4 -2 -4 221.48 17.1
 4 -2 -4 212.98 13.8
 4 -2 -4 201.88 15.8
 -4 2 4 185.58 15.5
 -4 2 4 228.18 14.4
 -4 2 4 223.18 15.8
 -4 2 4 217.28 15.7
 -4 2 4 202.98 15.4
 -4 2 4 244.98 14.5
 -4 2 4 210.48 14.8
 -4 2 4 194.68 15.3
 -4 2 4 197.98 14.1
 -4 2 4 203.98 15.7
 -4 2 4 239.78 15.5
 -4 2 4 233.38 15.9
 -4 2 4 187.48 16.3
 5 -2 -4 34.5 7.9
 5 -2 -4 36.6 5
 5 -2 -4 28.2 3.4
 5 -2 -4 35.4 6.9
 5 -2 -4 51.39 7.5
 5 -2 -4 38.7 5.6
 5 -2 -4 44.7 7.2
 5 -2 -4 41 6.3
 5 -2 -4 30.4 4.7
 -5 2 4 43.2 4.2
 -5 2 4 34.4 4.9
 -5 2 4 39.6 5.9
 -5 2 4 33.5 5.7
 -5 2 4 34.1 5.4
 -5 2 4 33.9 5.4
 -5 2 4 35.9 4.6
 -5 2 4 42.3 7.1
 -5 2 4 36.9 5.7
 -5 2 4 32.1 5.7
 -5 2 4 37.1 6.2
 -5 2 4 37.8 4.1
 6 -2 -4 130.29 11
 6 -2 -4 157.98 15.5
 6 -2 -4 140.59 12.1
 6 -2 -4 142.39 10.9
 6 -2 -4 133.79 12.7
 6 -2 -4 137.49 12.6
 6 -2 -4 141.89 14.1
 6 -2 -4 138.09 12.6
 6 -2 -4 125.59 11.2
 -6 2 4 134.79 11.8
 -6 2 4 162.38 11.3
 -6 2 4 160.68 12.6
 -6 2 4 129.19 12.1
 -6 2 4 123.29 12.3
 -6 2 4 150.88 12.6
 -6 2 4 134.99 11.6
 -6 2 4 149.39 11.8
 -6 2 4 165.68 11.3
 -6 2 4 142.29 13.6
 7 -2 -4 64.09 8.7
 7 -2 -4 41.7 6.5
 7 -2 -4 56.69 6.6
 7 -2 -4 65.79 7.9
 7 -2 -4 75.49 10.3
 7 -2 -4 58.49 9.2
 7 -2 -4 55.59 11.2
 7 -2 -4 49.6 9
 7 -2 -4 66.79 9.2
 -7 2 4 55.89 6.9
 -7 2 4 49.2 8
 -7 2 4 65.49 7.1
 -7 2 4 64.29 8.5
 -7 2 4 46.5 7.6
 -7 2 4 55.09 7.9
 -7 2 4 46.7 8.8
 -7 2 4 60.39 7.9
 -7 2 4 54.49 7.6
 -7 2 4 64.49 8
 8 -2 -4 14.1 7.3
 8 -2 -4 23.5 6.7
 8 -2 -4 10.2 3.1
 8 -2 -4 14 5.5
 8 -2 -4 12.2 3.4
 8 -2 -4 21.3 7
 8 -2 -4 7.3 2.9
 8 -2 -4 25 6.4
 8 -2 -4 12.4 5
 -8 2 4 7.7 4.9
 -8 2 4 15.8 5.2
 -8 2 4 9.1 3.9
 -8 2 4 21.6 4.8
 -8 2 4 11.5 4.5
 -8 2 4 18 5.9
 -8 2 4 14.2 4.4
 -8 2 4 24.7 5.5
 -8 2 4 19.1 4.3
 -8 2 4 18 5.2
 9 -2 -4 9.9 5.3
 9 -2 -4 14.4 3.6
 9 -2 -4 16.7 6.2
 9 -2 -4 21.1 4.6
 9 -2 -4 11.3 6.1
 9 -2 -4 28.4 7.5
 9 -2 -4 25.2 8.7
 -9 2 4 22.2 5.7
 -9 2 4 21.6 6.1
 -9 2 4 18.8 4.4
 -9 2 4 6.6 5.2
 -9 2 4 18.9 6.3
 -9 2 4 13.2 4.2
 -9 2 4 10 5.3
 10 -2 -4 98.59 14.1
 10 -2 -4 114.69 16.8
 10 -2 -4 78.89 12.2
 10 -2 -4 113.49 15.4
 10 -2 -4 88.99 16.7
 -10 2 4 122.89 14.5
 -10 2 4 114.89 10.9
 -10 2 4 108.99 13.3
 -10 2 4 98.79 11.7
 11 -2 -4 145.39 22
 11 -2 -4 149.39 17.6
 11 -2 -4 129.29 17.3
 11 -2 -4 147.79 19.3
 11 -2 -4 163.58 19
 -11 2 4 149.09 16.4
 -11 2 4 133.39 12.5
 -11 2 4 125.49 12.8
 -11 2 4 144.69 17
 12 -2 -4 2.9 5.7
 12 -2 -4 -1.3 8.2
 12 -2 -4 3.9 8.1
 12 -2 -4 2.2 6
 -12 2 4 -1.1 3.1
 -12 2 4 -6.7 4.4
 -12 2 4 -0.4 2.8
 -12 2 4 0.1 4.5
 13 -2 -4 -9.5 7.8
 13 -2 -4 2.8 7.1
 13 -2 -4 4.9 7.9
 13 -2 -4 6.3 6.1
 -13 2 4 -4.1 2.5
 -13 2 4 1.2 6.3
 -13 2 4 2.9 3.2
 -14 -1 -3 10.7 6.7
 -14 -1 -3 5.7 6.1
 -14 -1 -3 12.7 4.7
 14 1 3 9.1 7.8
 14 1 3 6.1 8.2
 14 1 3 5.2 6.4
 14 1 3 12 9
 -13 -1 -3 14.2 4.5
 -13 -1 -3 15.3 7.7
 -13 -1 -3 10.9 4.3
 -13 -1 -3 7.4 5.4
 13 1 3 13.6 8.3
 13 1 3 13.3 7.8
 13 1 3 12.5 7.4
 13 1 3 2.8 7.8
 -12 -1 -3 3.6 3.1
 -12 -1 -3 3.4 5.5
 -12 -1 -3 1.1 4
 -12 -1 -3 7.8 3.6
 12 1 3 5.9 7.7
 12 1 3 3.9 6.7
 12 1 3 -1.8 5.6
 12 1 3 12.4 7.8
 12 1 3 7.4 6.6
 -11 -1 -3 15.7 4.1
 -11 -1 -3 10.1 5.3
 -11 -1 -3 10.5 6.2
 -11 -1 -3 10.8 4.7
 -11 -1 -3 16.2 4.1
 11 1 3 16.7 7.2
 11 1 3 19.2 8.9
 11 1 3 9.4 6.7
 11 1 3 22.9 8.6
 11 1 3 18 7
 -10 -1 -3 157.68 13.4
 -10 -1 -3 145.19 10.5
 -10 -1 -3 136.09 11.3
 -10 -1 -3 122.99 11.5
 -10 -1 -3 146.89 14.3
 -10 -1 -3 165.28 15.2
 -10 -1 -3 145.69 11.4
 -10 -1 -3 151.08 13.6
 -10 -1 -3 129.69 11.1
 10 1 3 120.39 15.8
 10 1 3 159.88 20.9
 10 1 3 131.19 17.4
 10 1 3 131.99 15.7
 10 1 3 129.89 16.8
 10 1 3 152.28 17.9
 -9 -1 -3 317.67 20.9
 -9 -1 -3 329.07 23.5
 -9 -1 -3 324.67 20.6
 -9 -1 -3 317.47 21.2
 -9 -1 -3 329.67 24.2
 -9 -1 -3 290.87 21.5
 -9 -1 -3 323.47 24.3
 -9 -1 -3 324.77 23
 -9 -1 -3 308.77 21.2
 -9 -1 -3 311.57 21.2
 9 1 3 343.17 24.4
 9 1 3 285.47 24.6
 9 1 3 301.77 24.5
 9 1 3 320.67 25.2
 9 1 3 336.47 21.6
 9 1 3 314.67 25.7
 9 1 3 333.37 24.5
 9 1 3 269.97 26.2
 -8 -1 -3 88.59 7.7
 -8 -1 -3 101.09 9.7
 -8 -1 -3 88.49 11.1
 -8 -1 -3 88.49 9.7
 -8 -1 -3 90.49 9.1
 -8 -1 -3 93.89 7.8
 -8 -1 -3 96.59 7.5
 -8 -1 -3 80.69 7.5
 -8 -1 -3 88.79 8.2
 -8 -1 -3 82.29 7.8
 8 1 3 101.59 12.7
 8 1 3 90.49 10.7
 8 1 3 122.89 14.5
 8 1 3 97.99 12.8
 8 1 3 97.09 14.5
 8 1 3 77.19 11.1
 8 1 3 97.79 11.7
 8 1 3 105.69 13.4
 8 1 3 79.99 8.2
 -7 -1 -3 8.5 2.5
 -7 -1 -3 11.5 3.3
 -7 -1 -3 14.6 4.3
 -7 -1 -3 12.6 2.9
 -7 -1 -3 17.7 4
 -7 -1 -3 9.9 3.5
 -7 -1 -3 14.7 3.1
 -7 -1 -3 8 2.5
 -7 -1 -3 7.9 2.2
 -7 -1 -3 14.4 2.9
 7 1 3 10.4 4.3
 7 1 3 18.7 5
 7 1 3 8.7 4.8
 7 1 3 17.8 4.8
 7 1 3 14.8 5.1
 7 1 3 3.7 4.6
 7 1 3 8.2 3.4
 7 1 3 21 5.7
 7 1 3 10.1 4.4
 -6 -1 -3 458.15 28.4
 -6 -1 -3 448.96 29.8
 -6 -1 -3 436.16 29.6
 -6 -1 -3 454.25 29.2
 -6 -1 -3 463.45 28.2
 -6 -1 -3 445.96 28.7
 -6 -1 -3 451.95 28.3
 -6 -1 -3 473.85 30.4
 -6 -1 -3 449.46 28.5
 6 1 3 472.95 31.4
 6 1 3 464.55 31.6
 6 1 3 473.55 29.5
 6 1 3 456.85 29.9
 6 1 3 455.85 31.1
 6 1 3 408.36 30
 6 1 3 454.65 30.5
 6 1 3 436.36 32.4
 6 1 3 442.86 27.9
 6 1 3 456.45 27.8
 6 1 3 474.75 30.3
 -5 -1 -3 1114.39 68.79
 -5 -1 -3 1174.78 69.19
 -5 -1 -3 1097.59 69.19
 -5 -1 -3 1108.09 68.89
 -5 -1 -3 1169.58 69.99
 -5 -1 -3 1152.68 69.79
 -5 -1 -3 1144.79 68.89
 -5 -1 -3 1161.88 70.39
 5 1 3 1170.18 68.49
 5 1 3 1108.39 68.99
 5 1 3 1172.38 71.19
 5 1 3 1243.58 69.19
 5 1 3 1147.29 69.99
 5 1 3 1149.39 68.19
 5 1 3 1149.69 72.59
 5 1 3 1245.98 70.49
 5 1 3 1213.98 70.09
 5 1 3 1156.28 71.59
 5 1 3 1017.8 69.29
 5 1 3 1182.08 71.29
 5 1 3 1011 69.89
 5 1 3 1155.88 68.59
 5 1 3 1225.08 70.09
 -4 -1 -3 65.19 5.3
 -4 -1 -3 57.59 5.4
 -4 -1 -3 58.89 5.4
 -4 -1 -3 63.59 5.4
 -4 -1 -3 53.89 5.9
 -4 -1 -3 61.39 5.2
 -4 -1 -3 68.39 6
 -4 -1 -3 67.39 5.7
 4 1 3 54.69 5.5
 4 1 3 58.29 4.7
 4 1 3 50.99 5.2
 4 1 3 59.39 5
 4 1 3 74.69 6.3
 4 1 3 63.69 6.2
 4 1 3 60.29 5.2
 4 1 3 56.29 5
 4 1 3 58.69 7.4
 4 1 3 64.39 9.2
 4 1 3 64.09 6
 4 1 3 72.19 7
 4 1 3 60.89 7.6
 4 1 3 67.29 6.5
 4 1 3 59.79 5.9
 -3 -1 -3 600.54 35.8
 -3 -1 -3 589.94 36.2
 -3 -1 -3 594.84 36.3
 -3 -1 -3 609.94 36.6
 -3 -1 -3 593.64 36
 -3 -1 -3 614.74 36.4
 -3 -1 -3 613.94 35.5
 -3 -1 -3 591.94 36.2
 3 1 3 592.54 35.6
 3 1 3 602.94 37.6
 3 1 3 550.44 35.6
 3 1 3 585.14 36.3
 3 1 3 571.84 37.1
 3 1 3 620.44 36.7
 3 1 3 564.74 38.2
 3 1 3 574.44 36.1
 3 1 3 541.35 35.9
 3 1 3 614.84 35.5
 3 1 3 598.44 35.9
 3 1 3 586.94 36.4
 3 1 3 583.44 37.1
 -2 -1 -3 2787.12 171.38
 -2 -1 -3 2960.5 171.28
 -2 -1 -3 2536.15 172.18
 -2 -1 -3 3222.98 170.38
 -2 -1 -3 2886.41 171.58
 -2 -1 -3 3058.19 170.58
 -2 -1 -3 2812.02 171.38
 -2 -1 -3 3190.98 170.48
 -2 -1 -3 2872.11 171.48
 -2 -1 -3 2950.8 171.38
 2 1 3 2934.41 171.18
 2 1 3 2945.31 171.38
 2 1 3 2822.42 171.38
 2 1 3 2950.3 171.28
 2 1 3 3149.58 171.98
 2 1 3 2705.93 170.58
 2 1 3 3007.3 170.48
 2 1 3 2780.32 171.48
 2 1 3 3044.1 171.48
 2 1 3 2710.83 170.38
 2 1 3 2922.71 171.88
 2 1 3 2633.94 172.58
 -1 -1 -3 120.89 8.6
 -1 -1 -3 125.19 9.7
 -1 -1 -3 120.59 8.8
 -1 -1 -3 120.29 9.5
 -1 -1 -3 127.79 9.5
 -1 -1 -3 119.49 9.3
 -1 -1 -3 132.49 8.7
 -1 -1 -3 126.19 8.5
 -1 -1 -3 130.39 9.4
 -1 -1 -3 124.79 9.4
 1 1 3 135.89 8.8
 1 1 3 115.79 9.5
 1 1 3 141.59 7.7
 1 1 3 106.39 9.8
 1 1 3 125.09 8.4
 1 1 3 128.99 9.3
 1 1 3 130.79 9.4
 1 1 3 135.39 9.4
 1 1 3 127.89 8.7
 0 -1 -3 6.4 2.2
 0 -1 -3 10.2 1.9
 0 -1 -3 8.6 2.1
 0 -1 -3 11 2.4
 0 -1 -3 9.6 2.7
 0 -1 -3 4.5 2.2
 0 -1 -3 9.5 2.4
 0 -1 -3 10.5 2.7
 0 -1 -3 9.8 2
 0 -1 -3 8.7 2.7
 0 1 3 6.1 2.1
 0 1 3 5.7 2.1
 0 1 3 6.6 2.4
 0 1 3 8.8 2.4
 0 1 3 10.3 2.2
 0 1 3 8.3 2.5
 0 1 3 6.1 2.6
 0 1 3 6.5 1.8
 0 1 3 9.7 2.5
 0 1 3 13.5 2
 0 1 3 9.4 2.3
 1 -1 -3 632.04 36.8
 1 -1 -3 561.74 36.4
 1 -1 -3 597.84 36.1
 1 -1 -3 553.94 35.9
 1 -1 -3 561.24 36.2
 1 -1 -3 572.34 36.1
 1 -1 -3 632.84 36.5
 1 -1 -3 620.14 36.7
 1 -1 -3 505.55 35.5
 -1 1 3 584.34 36
 -1 1 3 614.54 36.5
 -1 1 3 646.24 35.6
 -1 1 3 593.34 36.6
 -1 1 3 591.24 36.2
 -1 1 3 541.95 36.1
 -1 1 3 674.03 36.3
 -1 1 3 595.74 36.2
 2 -1 -3 1519.65 91.99
 2 -1 -3 1552.64 92.49
 2 -1 -3 1593.94 91.39
 2 -1 -3 1625.44 92.79
 2 -1 -3 1437.56 92.69
 2 -1 -3 1593.94 91.69
 2 -1 -3 1560.94 92.69
 2 -1 -3 1692.03 91.09
 2 -1 -3 1527.15 91.89
 2 -1 -3 1462.05 92.39
 2 -1 -3 1536.45 92.19
 -2 1 3 1471.95 91.69
 -2 1 3 1755.92 92.29
 -2 1 3 1509.85 91.89
 -2 1 3 1556.04 92.39
 -2 1 3 1531.65 92.29
 -2 1 3 1497.15 92.29
 -2 1 3 1511.45 91.19
 -2 1 3 1544.15 92.39
 -2 1 3 1568.24 92.49
 -2 1 3 1554.64 91.59
 -2 1 3 1391.56 92.59
 3 -1 -3 149.79 9.9
 3 -1 -3 104.29 10.9
 3 -1 -3 137.89 10.3
 3 -1 -3 113.09 10.6
 3 -1 -3 122.59 9.5
 3 -1 -3 127.49 10.1
 3 -1 -3 113.99 9.8
 3 -1 -3 125.59 9.3
 3 -1 -3 132.79 8.7
 3 -1 -3 123.69 9.7
 3 -1 -3 129.79 9.8
 -3 1 3 144.09 9.3
 -3 1 3 109.09 10.4
 -3 1 3 129.49 9
 -3 1 3 125.79 9.8
 -3 1 3 129.69 9.8
 -3 1 3 123.39 9.8
 -3 1 3 150.78 8.7
 -3 1 3 128.99 9.4
 -3 1 3 109.29 9.7
 -3 1 3 130.89 9.9
 -3 1 3 120.99 9.9
 -3 1 3 130.59 9.8
 4 -1 -3 418.16 27.7
 4 -1 -3 443.06 28
 4 -1 -3 436.66 27.6
 4 -1 -3 430.96 28.9
 4 -1 -3 414.36 29.7
 4 -1 -3 459.65 28.6
 4 -1 -3 453.85 27
 4 -1 -3 447.86 28.8
 4 -1 -3 428.56 28.2
 4 -1 -3 441.56 30.8
 4 -1 -3 524.75 28.3
 4 -1 -3 443.36 29.1
 -4 1 3 426.06 29.6
 -4 1 3 452.35 27.1
 -4 1 3 446.06 27.7
 -4 1 3 471.15 27.3
 -4 1 3 446.46 28.5
 -4 1 3 394.96 28.6
 -4 1 3 430.76 28.3
 -4 1 3 426.36 28.1
 -4 1 3 431.16 28.5
 -4 1 3 431.36 28.3
 -4 1 3 434.06 28.1
 -4 1 3 445.56 28
 5 -1 -3 315.37 21
 5 -1 -3 292.37 19.4
 5 -1 -3 302.87 22.3
 5 -1 -3 302.57 21
 5 -1 -3 302.47 20.9
 5 -1 -3 307.37 23.3
 5 -1 -3 314.37 20.5
 5 -1 -3 286.07 19.6
 5 -1 -3 313.07 21.4
 5 -1 -3 290.57 19.5
 -5 1 3 326.97 20.6
 -5 1 3 312.37 18.8
 -5 1 3 286.87 21.9
 -5 1 3 297.17 20.6
 -5 1 3 259.37 20.7
 -5 1 3 311.17 19.5
 -5 1 3 290.77 19.9
 -5 1 3 292.87 20
 -5 1 3 274.17 20.2
 -5 1 3 318.17 19.7
 -5 1 3 296.67 20.1
 6 -1 -3 82.59 8.4
 6 -1 -3 74.19 10
 6 -1 -3 82.29 7
 6 -1 -3 79.39 7
 6 -1 -3 79.19 9.4
 6 -1 -3 82.49 12.2
 6 -1 -3 75.69 9.7
 6 -1 -3 73.99 6.7
 6 -1 -3 72.29 10
 -6 1 3 75.79 7.1
 -6 1 3 74.19 9.4
 -6 1 3 69.69 7.2
 -6 1 3 85.19 7.9
 -6 1 3 82.59 7.4
 -6 1 3 81.09 6.2
 -6 1 3 88.39 11.2
 -6 1 3 79.89 8.2
 -6 1 3 79.49 7.3
 -6 1 3 88.19 7.8
 7 -1 -3 294.27 23
 7 -1 -3 274.17 19.6
 7 -1 -3 266.27 19.5
 7 -1 -3 251.27 17.2
 7 -1 -3 237.98 17.1
 7 -1 -3 245.88 20
 7 -1 -3 255.57 17.3
 7 -1 -3 249.08 19.7
 7 -1 -3 241.88 20.9
 -7 1 3 245.58 17.7
 -7 1 3 266.67 19.1
 -7 1 3 253.87 18.1
 -7 1 3 275.77 21.2
 -7 1 3 247.18 17.9
 -7 1 3 263.97 16.3
 -7 1 3 268.77 17.6
 -7 1 3 248.58 18.1
 -7 1 3 239.08 19.5
 -7 1 3 250.17 18.3
 8 -1 -3 116.69 11.4
 8 -1 -3 85.99 8.5
 8 -1 -3 118.69 16.6
 8 -1 -3 104.29 13.4
 8 -1 -3 99.29 8.7
 8 -1 -3 104.59 8.9
 8 -1 -3 119.49 12
 8 -1 -3 96.19 13.6
 8 -1 -3 116.49 13.2
 -8 1 3 119.89 11
 -8 1 3 104.79 9.5
 -8 1 3 105.39 9.5
 -8 1 3 100.09 7.7
 -8 1 3 123.19 9.5
 -8 1 3 109.49 10.1
 -8 1 3 97.49 9.2
 -8 1 3 117.29 14.8
 -8 1 3 108.59 10.1
 -8 1 3 101.99 12.6
 9 -1 -3 20.5 4.2
 9 -1 -3 32 9
 9 -1 -3 19.9 6.3
 9 -1 -3 23.2 12.4
 9 -1 -3 36.3 8
 9 -1 -3 26.5 7.3
 9 -1 -3 17.9 7.9
 9 -1 -3 26.7 4.7
 -9 1 3 26.5 6.6
 -9 1 3 30.8 7.9
 -9 1 3 30.8 6.7
 -9 1 3 25.9 4.9
 -9 1 3 17.4 5
 -9 1 3 34.6 5.8
 -9 1 3 24.6 5.3
 -9 1 3 23.1 3.1
 10 -1 -3 671.43 43.7
 10 -1 -3 673.63 45
 10 -1 -3 627.64 42
 10 -1 -3 630.14 47.7
 10 -1 -3 606.94 44.6
 10 -1 -3 666.73 44.6
 -10 1 3 639.04 45.6
 -10 1 3 575.04 43.7
 -10 1 3 687.43 42.8
 -10 1 3 633.14 44
 -10 1 3 667.63 41.3
 -10 1 3 625.44 40.2
 -10 1 3 605.34 40.5
 11 -1 -3 21.5 7.2
 11 -1 -3 41.9 9.1
 11 -1 -3 33.1 11.4
 11 -1 -3 17.7 7.9
 11 -1 -3 25.6 8.3
 -11 1 3 32.4 8.2
 -11 1 3 31.7 6.1
 -11 1 3 33.1 6
 -11 1 3 36.5 7.6
 12 -1 -3 51.59 12.6
 12 -1 -3 39.5 12.7
 12 -1 -3 76.09 13.5
 12 -1 -3 59.79 10.9
 12 -1 -3 91.49 14.4
 -12 1 3 78.09 12.6
 -12 1 3 65.89 8.9
 -12 1 3 64.19 8.7
 -12 1 3 76.39 11.3
 13 -1 -3 55.79 13.3
 13 -1 -3 41.1 13.8
 13 -1 -3 37.8 10.7
 13 -1 -3 22.3 8.1
 -13 1 3 20.4 8
 -13 1 3 31.7 6.2
 -13 1 3 27.1 6.1
 -13 0 -2 1.6 3.4
 -13 0 -2 -6.5 4.1
 -13 0 -2 -1 5.6
 -13 0 -2 -2.2 2.7
 13 0 2 12.1 8.5
 13 0 2 -1.9 6.9
 13 0 2 6.7 7.9
 13 0 2 -3.1 4.9
 -12 0 -2 88.99 13.6
 -12 0 -2 82.19 11.6
 -12 0 -2 77.89 9.5
 -12 0 -2 84.09 9.8
 12 0 2 95.59 16.5
 12 0 2 66.49 12.5
 12 0 2 94.69 17.4
 12 0 2 70.79 14.5
 -11 0 -2 46.8 8.5
 -11 0 -2 40.7 9.1
 -11 0 -2 32.5 8.8
 -11 0 -2 48 7.1
 -11 0 -2 38.4 6.2
 11 0 2 36.4 9.7
 11 0 2 46.7 11.2
 11 0 2 40.2 10.7
 11 0 2 53.09 12.9
 11 0 2 32.8 9
 -10 0 -2 -5.5 2.4
 -10 0 -2 2.3 3.9
 -10 0 -2 -1.1 3.7
 -10 0 -2 -2.6 2.5
 -10 0 -2 -1.4 2.8
 -10 0 -2 -1.8 3.6
 -10 0 -2 -0.5 2.1
 -10 0 -2 3.8 2.6
 10 0 2 5.6 5.6
 10 0 2 9.5 6.2
 10 0 2 -0.4 4.5
 10 0 2 2 4.6
 10 0 2 1.5 4.6
 10 0 2 2.7 5.7
 -9 0 -2 581.54 40.5
 -9 0 -2 595.64 39.5
 -9 0 -2 648.74 38.5
 -9 0 -2 596.14 38.3
 -9 0 -2 600.34 39.7
 -9 0 -2 611.24 41
 -9 0 -2 582.74 38.6
 -9 0 -2 624.64 37.5
 -9 0 -2 623.64 36.2
 -9 0 -2 575.44 37.4
 -9 0 -2 567.34 37.4
 9 0 2 616.34 40.6
 9 0 2 536.75 42.7
 9 0 2 611.84 42.5
 9 0 2 626.14 41.5
 9 0 2 607.24 40.7
 9 0 2 497.45 40.6
 9 0 2 554.44 37.3
 9 0 2 575.24 41.7
 -8 0 -2 3.8 2.5
 -8 0 -2 -1.6 1.6
 -8 0 -2 6 3.1
 -8 0 -2 4.9 3.7
 -8 0 -2 2.5 3.1
 -8 0 -2 2.2 1.5
 -8 0 -2 -0.1 2.7
 -8 0 -2 3.3 2.6
 -8 0 -2 -0.9 2.5
 -8 0 -2 1.1 1.8
 -8 0 -2 4 2.6
 8 0 2 1.1 3.9
 8 0 2 1.4 2
 8 0 2 8.6 4.9
 8 0 2 6.3 3.2
 8 0 2 1.5 1.7
 8 0 2 1.4 3
 8 0 2 1 4.6
 8 0 2 2.6 3
 8 0 2 2.4 3.9
 8 0 2 10.8 5.4
 -7 0 -2 601.54 37.9
 -7 0 -2 591.64 39
 -7 0 -2 618.34 37.4
 -7 0 -2 565.84 37.9
 -7 0 -2 581.54 36.3
 -7 0 -2 559.54 36.3
 -7 0 -2 584.04 38.7
 -7 0 -2 590.64 35.5
 -7 0 -2 554.94 36.4
 -7 0 -2 593.64 37
 -7 0 -2 621.94 36.4
 7 0 2 585.74 38.8
 7 0 2 649.24 39
 7 0 2 586.74 35.8
 7 0 2 616.04 37.8
 7 0 2 571.94 39.3
 7 0 2 571.24 39.7
 7 0 2 625.44 40.2
 7 0 2 574.74 36.5
 7 0 2 526.25 40.4
 7 0 2 586.24 36.4
 7 0 2 517.85 38.8
 -6 0 -2 5.6 3
 -6 0 -2 6 1.9
 -6 0 -2 6.4 2.8
 -6 0 -2 6.2 2.6
 -6 0 -2 5 2.1
 -6 0 -2 4.6 2.2
 -6 0 -2 7.7 3.3
 -6 0 -2 4.2 2
 -6 0 -2 6.3 2.2
 -6 0 -2 4.6 1.4
 6 0 2 6.7 3.3
 6 0 2 3.6 1.8
 6 0 2 1.3 2.4
 6 0 2 2.7 2.8
 6 0 2 8.9 4
 6 0 2 4.8 2
 6 0 2 6.6 2.7
 6 0 2 2 2.8
 6 0 2 7.7 3.9
 6 0 2 3.4 2.1
 6 0 2 6.3 2.4
 6 0 2 11.1 5.1
 6 0 2 6.1 3.7
 6 0 2 4.4 2.9
 -5 0 -2 6.9 2.1
 -5 0 -2 8.2 2.6
 -5 0 -2 9.5 2
 -5 0 -2 3.9 2.6
 -5 0 -2 6.5 2.2
 -5 0 -2 8.2 2.6
 -5 0 -2 8.3 2.2
 -5 0 -2 9.7 3.2
 -5 0 -2 6.5 2.1
 5 0 2 5.2 2.7
 5 0 2 8.5 2.9
 5 0 2 5.1 1.8
 5 0 2 9.6 2.5
 5 0 2 12.1 4.8
 5 0 2 9.9 3.3
 5 0 2 7.9 2.1
 5 0 2 12.6 3.6
 5 0 2 7.9 3.6
 5 0 2 5.8 2
 5 0 2 7 2.5
 5 0 2 18.6 4.6
 5 0 2 7.7 3.2
 5 0 2 5.5 3
 -4 0 -2 798.22 44.3
 -4 0 -2 757.72 44.9
 -4 0 -2 744.63 45.3
 -4 0 -2 759.32 45.2
 -4 0 -2 770.62 45.8
 -4 0 -2 734.43 44.9
 -4 0 -2 699.13 45.5
 -4 0 -2 739.63 44.8
 -4 0 -2 719.83 46
 4 0 2 733.13 46.6
 4 0 2 755.02 44.5
 4 0 2 694.83 45.9
 4 0 2 739.73 45.1
 4 0 2 731.63 46.5
 4 0 2 783.32 46.9
 4 0 2 671.53 45.3
 4 0 2 748.93 44.9
 4 0 2 731.93 44.7
 4 0 2 771.92 46.1
 4 0 2 749.53 47.7
 -3 0 -2 35.4 3.8
 -3 0 -2 31.4 3.9
 -3 0 -2 32.9 3.6
 -3 0 -2 32.3 3.9
 -3 0 -2 26.8 2.5
 -3 0 -2 32.5 4.3
 -3 0 -2 30.1 3.5
 -3 0 -2 41.3 4.8
 -3 0 -2 33.8 3.9
 -3 0 -2 40.7 4
 3 0 2 33.2 4.3
 3 0 2 23.4 4.1
 3 0 2 28.9 3.7
 3 0 2 36.5 3.9
 3 0 2 30.9 5.8
 3 0 2 37.7 4
 3 0 2 36 3.9
 3 0 2 29.6 3
 3 0 2 31.5 4.9
 3 0 2 29.7 4.7
 3 0 2 35.1 4.6
 3 0 2 20.4 3.4
 -2 0 -2 451.35 28.7
 -2 0 -2 495.95 28.7
 -2 0 -2 495.75 29.2
 -2 0 -2 464.85 29
 -2 0 -2 510.95 28.5
 -2 0 -2 456.65 28.8
 -2 0 -2 475.35 28.9
 -2 0 -2 443.06 28.9
 -2 0 -2 507.55 29.4
 2 0 2 457.85 28.9
 2 0 2 465.85 29
 2 0 2 483.95 29.2
 2 0 2 481.05 28.6
 2 0 2 471.45 30.3
 2 0 2 458.75 29
 2 0 2 467.95 28.7
 2 0 2 459.75 28.6
 2 0 2 455.65 28.8
 -1 0 -2 646.24 39.8
 -1 0 -2 690.53 39.6
 -1 0 -2 653.23 39
 -1 0 -2 731.43 39.2
 -1 0 -2 659.03 40
 -1 0 -2 606.44 39.7
 -1 0 -2 729.63 39.1
 -1 0 -2 644.04 39.7
 -1 0 -2 631.84 39.3
 -1 0 -2 640.34 39.4
 -1 0 -2 637.84 39.6
 1 0 2 763.32 39.1
 1 0 2 634.24 39.8
 1 0 2 623.14 39.5
 1 0 2 650.23 39.3
 1 0 2 622.34 39.9
 1 0 2 692.53 39.7
 1 0 2 713.23 39.2
 1 0 2 621.54 39.6
 1 0 2 599.34 40.3
 1 0 2 633.34 39.6
 1 0 2 651.53 38.9
 0 0 -2 450.75 27.2
 0 0 -2 476.65 26.8
 0 0 -2 470.35 27.3
 0 0 -2 431.86 27.1
 0 0 -2 468.45 26.8
 0 0 -2 415.46 26.9
 0 0 -2 466.65 26.8
 0 0 -2 473.85 26.6
 0 0 -2 442.36 27.1
 0 0 -2 413.66 27.1
 0 0 2 407.66 26.9
 0 0 2 420.86 27
 0 0 2 477.45 26.8
 0 0 2 448.46 27.2
 0 0 2 453.15 26.6
 0 0 2 440.66 27.1
 0 0 2 437.76 26.7
 0 0 2 409.86 27
 0 0 2 413.86 27.1
 0 0 2 467.35 27.2
 0 0 2 427.26 26.8
 1 0 -2 183.28 10.4
 1 0 -2 167.08 10.9
 1 0 -2 162.98 10.5
 1 0 -2 154.18 10.7
 1 0 -2 154.48 10.4
 1 0 -2 149.49 10.6
 1 0 -2 155.08 10.7
 -1 0 2 151.88 10.7
 -1 0 2 149.69 10.7
 -1 0 2 177.88 10.4
 -1 0 2 156.08 10.7
 -1 0 2 156.68 10.4
 -1 0 2 154.28 10.6
 -1 0 2 158.08 10.8
 -1 0 2 163.08 10.5
 2 0 -2 1939.11 114.19
 2 0 -2 1887.01 114.39
 2 0 -2 1904.91 114.29
 2 0 -2 2092.49 114.09
 2 0 -2 1981.7 114.79
 2 0 -2 1972.2 114.59
 2 0 -2 1897.61 114.29
 -2 0 2 1878.01 114.49
 -2 0 2 1940.91 114.19
 -2 0 2 1924.01 114.39
 -2 0 2 2085.09 114.29
 -2 0 2 1675.43 114.89
 -2 0 2 1918.21 114.39
 -2 0 2 1948.71 114.49
 -2 0 2 1952.8 114.09
 3 0 -2 3081.99 159.78
 3 0 -2 2693.33 159.88
 3 0 -2 2647.04 159.38
 3 0 -2 2760.52 159.18
 3 0 -2 2375.76 160.28
 3 0 -2 2616.34 159.78
 3 0 -2 2620.44 158.98
 3 0 -2 2899.61 158.98
 3 0 -2 2689.53 159.28
 3 0 -2 2778.22 159.08
 3 0 -2 2713.23 159.08
 -3 0 2 2646.24 159.28
 -3 0 2 2455.85 160.38
 -3 0 2 2897.61 158.88
 -3 0 2 2707.53 159.28
 -3 0 2 2701.83 159.78
 -3 0 2 2596.34 159.28
 -3 0 2 2682.43 159.18
 4 0 -2 1413.96 82.49
 4 0 -2 1361.26 81.89
 4 0 -2 1394.26 82.29
 4 0 -2 1294.07 84.49
 4 0 -2 1421.16 81.79
 4 0 -2 1421.76 82.99
 4 0 -2 1492.95 83.09
 4 0 -2 1237.08 83.69
 4 0 -2 1380.76 84.39
 4 0 -2 1329.77 81.59
 4 0 -2 1455.85 83.09
 4 0 -2 1379.16 81.99
 -4 0 2 1269.97 83.69
 -4 0 2 1358.56 82.79
 -4 0 2 1192.38 82.79
 -4 0 2 1351.86 81.99
 -4 0 2 1337.27 82.09
 -4 0 2 1426.36 81.99
 -4 0 2 1440.36 82.19
 -4 0 2 1355.86 81.99
 -4 0 2 1533.75 81.69
 5 0 -2 1188.58 70.79
 5 0 -2 1156.28 70.49
 5 0 -2 1231.68 73.09
 5 0 -2 1212.48 70.69
 5 0 -2 1184.48 70.49
 5 0 -2 1166.98 69.19
 5 0 -2 1147.79 69.59
 5 0 -2 1144.19 71.19
 5 0 -2 1169.78 69.29
 5 0 -2 1179.58 68.89
 5 0 -2 1060.09 71.59
 5 0 -2 1148.19 68.79
 5 0 -2 1189.28 70.49
 -5 0 2 1071.99 71.39
 -5 0 2 1139.49 69.29
 -5 0 2 1117.59 69.29
 -5 0 2 1110.69 69.29
 -5 0 2 1040.6 70.49
 -5 0 2 1133.69 70.29
 -5 0 2 1130.59 69.39
 -5 0 2 1276.27 68.89
 -5 0 2 1178.28 69.59
 6 0 -2 2628.44 153.58
 6 0 -2 2635.34 154.88
 6 0 -2 2606.04 154.98
 6 0 -2 2482.85 156.38
 6 0 -2 2682.53 154.78
 6 0 -2 2556.54 152.58
 6 0 -2 2549.54 153.28
 6 0 -2 2606.24 155.28
 6 0 -2 2621.64 157.48
 6 0 -2 2610.14 155.78
 6 0 -2 2472.45 152.68
 6 0 -2 2667.03 155.08
 -6 0 2 2645.34 153.28
 -6 0 2 2641.54 154.58
 -6 0 2 2576.54 153.48
 -6 0 2 2741.93 153.68
 -6 0 2 2514.85 153.18
 -6 0 2 2259.67 154.68
 -6 0 2 2544.85 153.28
 -6 0 2 2492.65 156.08
 -6 0 2 2777.52 152.78
 7 0 -2 170.88 16.6
 7 0 -2 155.88 14.6
 7 0 -2 183.68 15
 7 0 -2 168.08 12.6
 7 0 -2 179.28 14.1
 7 0 -2 184.28 14.5
 7 0 -2 159.28 11.9
 7 0 -2 189.58 16.3
 7 0 -2 176.78 11.7
 7 0 -2 197.48 15.5
 -7 0 2 195.08 12.2
 -7 0 2 173.68 13.1
 -7 0 2 163.58 15.5
 -7 0 2 176.78 12.5
 -7 0 2 179.98 14.2
 -7 0 2 187.68 12.8
 -7 0 2 178.48 14.8
 -7 0 2 158.18 12.5
 -7 0 2 186.18 13
 8 0 -2 213.08 17.8
 8 0 -2 214.58 18.9
 8 0 -2 198.48 19.3
 8 0 -2 211.28 16.5
 8 0 -2 206.48 17.5
 8 0 -2 202.28 17.7
 8 0 -2 222.08 15.8
 8 0 -2 198.38 14.7
 8 0 -2 209.28 17.2
 -8 0 2 195.78 17
 -8 0 2 235.98 14.2
 -8 0 2 195.68 14.7
 -8 0 2 199.78 14.5
 -8 0 2 221.28 15.5
 -8 0 2 196.98 14.8
 -8 0 2 198.98 16.1
 -8 0 2 194.98 18.1
 -8 0 2 207.18 14.7
 9 0 -2 15.6 6.7
 9 0 -2 19.2 6.1
 9 0 -2 10.7 6.8
 9 0 -2 12.1 3.8
 9 0 -2 10.9 5.8
 9 0 -2 13.9 5.2
 9 0 -2 20.1 6.8
 9 0 -2 8.8 4.6
 -9 0 2 14.4 3.7
 -9 0 2 13.5 4.9
 -9 0 2 16.5 4.4
 -9 0 2 14.1 3.7
 -9 0 2 12.1 3.6
 -9 0 2 10.4 2.8
 -9 0 2 17.5 5.9
 -9 0 2 12.7 3.8
 -9 0 2 12.7 5
 10 0 -2 2.6 5.3
 10 0 -2 5.6 6.7
 10 0 -2 4.8 3.7
 10 0 -2 4.9 4.8
 10 0 -2 2.7 5.6
 -10 0 2 3.4 4.2
 -10 0 2 -0.9 2.7
 -10 0 2 -0.4 2.8
 -10 0 2 1.6 3.6
 -10 0 2 2.9 2.6
 -10 0 2 2.7 2.6
 -10 0 2 1.2 2.4
 -10 0 2 -3.1 3.4
 11 0 -2 38.5 11.1
 11 0 -2 44.4 9.3
 11 0 -2 51.69 12.7
 11 0 -2 26.9 7.3
 11 0 -2 58.09 11.3
 -11 0 2 50.69 8.6
 -11 0 2 40.7 8.5
 -11 0 2 38.3 6.1
 -11 0 2 44.1 6.7
 12 0 -2 325.37 28.4
 12 0 -2 340.67 28.3
 12 0 -2 328.67 26
 12 0 -2 333.87 30.9
 12 0 -2 297.97 28.1
 -12 0 2 355.76 25.8
 -12 0 2 351.06 27.4
 -12 0 2 313.77 22.6
 -12 0 2 340.87 23.4
 13 0 -2 17 8.7
 13 0 -2 17.6 8.4
 13 0 -2 28.7 7.4
 13 0 -2 9.3 8.4
 13 0 -2 32.3 11.8
 -13 0 2 27.3 5.3
 -13 0 2 25.2 5.6
 -13 0 2 33 10.3
 -13 0 2 11.4 7
 -13 0 2 30.1 8.4
 14 0 -2 1.3 6
 14 0 -2 -1.9 6.7
 14 0 -2 7.8 8.9
 14 0 -2 0.7 4.7
 -14 0 2 -1.8 4.3
 -14 0 2 3 4.8
 -14 0 2 5.7 3.9
 -14 0 2 8.7 5.4
 -13 1 -1 177.98 15.5
 -13 1 -1 187.38 19.8
 -13 1 -1 189.18 18.7
 -13 1 -1 200.88 15.6
 13 -1 1 155.78 24.3
 13 -1 1 147.19 22.9
 13 -1 1 155.88 22.8
 13 -1 1 192.48 20.2
 -12 1 -1 39.1 6.9
 -12 1 -1 32.1 6.2
 -12 1 -1 38.2 8.4
 -12 1 -1 55.29 11.2
 12 -1 1 49.6 12.7
 12 -1 1 22.9 10.2
 12 -1 1 56.09 11.3
 12 -1 1 40 11.1
 -11 1 -1 94.99 9.6
 -11 1 -1 94.49 14.2
 -11 1 -1 101.09 13
 -11 1 -1 94.19 9.7
 11 -1 1 95.99 13.8
 11 -1 1 102.19 17.3
 11 -1 1 97.39 12.7
 11 -1 1 85.39 14.9
 11 -1 1 94.39 16.8
 -10 1 -1 12.1 4.4
 -10 1 -1 15.2 5.6
 -10 1 -1 11.6 5.3
 -10 1 -1 16.6 4.1
 -10 1 -1 14.3 6
 -10 1 -1 14.6 4
 -10 1 -1 10.9 5.6
 10 -1 1 13.8 5.1
 10 -1 1 8.4 5.9
 10 -1 1 17.6 8.2
 10 -1 1 5.9 5.6
 10 -1 1 10.3 5.6
 10 -1 1 10.2 6.6
 -9 1 -1 21.7 4.6
 -9 1 -1 16 4
 -9 1 -1 8 4.6
 -9 1 -1 23.3 5.8
 -9 1 -1 12.6 5.1
 -9 1 -1 13.2 6.1
 -9 1 -1 22.2 4.6
 -9 1 -1 21.9 5.2
 9 -1 1 20.2 4.3
 9 -1 1 25.4 6.9
 9 -1 1 9.4 5.7
 9 -1 1 11.4 5.8
 9 -1 1 32.8 6.5
 9 -1 1 15.9 8.2
 9 -1 1 18.3 7.3
 9 -1 1 16.3 6.8
 -8 1 -1 1.4 3.8
 -8 1 -1 2.5 2.2
 -8 1 -1 0.7 3.1
 -8 1 -1 3.9 2.6
 -8 1 -1 3.5 2.2
 -8 1 -1 3 3.1
 -8 1 -1 -0.6 2.1
 -8 1 -1 0.3 1.9
 -8 1 -1 -0.9 2.9
 -8 1 -1 -1.9 2.2
 8 -1 1 8.6 4.8
 8 -1 1 -0.6 4.2
 8 -1 1 0.4 4.5
 8 -1 1 -2.2 2.5
 8 -1 1 -0.6 2.7
 8 -1 1 1.9 3.4
 8 -1 1 4.3 4.3
 8 -1 1 3.2 2.7
 8 -1 1 -2.8 4.4
 -7 1 -1 11.7 3.5
 -7 1 -1 13.1 2.9
 -7 1 -1 13.5 3.2
 -7 1 -1 11.4 4.4
 -7 1 -1 5.1 2.4
 -7 1 -1 15.8 4.2
 -7 1 -1 12.1 1.8
 -7 1 -1 7.1 3.3
 -7 1 -1 8.2 2.8
 -7 1 -1 3.3 3.3
 -7 1 -1 15.9 3.5
 7 -1 1 18.1 3.7
 7 -1 1 -1.1 3.5
 7 -1 1 8.9 2.8
 7 -1 1 10.8 4.7
 7 -1 1 5.1 4.4
 7 -1 1 6.8 4.1
 7 -1 1 14.8 4.2
 7 -1 1 5.3 4.8
 7 -1 1 8.2 2
 7 -1 1 9.6 3.8
 7 -1 1 13.8 5.3
 -6 1 -1 317.97 19.2
 -6 1 -1 264.47 20.3
 -6 1 -1 304.47 19.2
 -6 1 -1 314.37 21.6
 -6 1 -1 298.27 19.3
 -6 1 -1 310.67 20.1
 -6 1 -1 285.37 21.2
 -6 1 -1 279.97 19.3
 -6 1 -1 290.07 17.8
 -6 1 -1 278.27 19.3
 -6 1 -1 302.07 20.6
 6 -1 1 270.37 21
 6 -1 1 297.67 18.8
 6 -1 1 337.97 21.5
 6 -1 1 273.67 21.6
 6 -1 1 264.57 20.9
 6 -1 1 296.57 22.1
 6 -1 1 355.76 23.5
 6 -1 1 289.47 19.3
 6 -1 1 284.07 19.3
 6 -1 1 287.57 20.4
 6 -1 1 273.87 22.5
 -5 1 -1 331.67 20.9
 -5 1 -1 332.77 20.8
 -5 1 -1 319.97 21.7
 -5 1 -1 343.37 22
 -5 1 -1 315.27 21.3
 -5 1 -1 321.87 20.9
 -5 1 -1 325.17 20.9
 -5 1 -1 334.97 22.6
 -5 1 -1 333.67 22.6
 -5 1 -1 335.57 20.5
 5 -1 1 352.16 23.8
 5 -1 1 317.87 21
 5 -1 1 357.46 22.4
 5 -1 1 324.17 20.6
 5 -1 1 282.77 22.5
 5 -1 1 340.07 21.9
 5 -1 1 307.27 22.4
 5 -1 1 343.37 24.1
 5 -1 1 304.27 21.9
 5 -1 1 322.37 21
 5 -1 1 321.57 22.5
 5 -1 1 287.57 22.5
 5 -1 1 321.47 20.8
 -4 1 -1 216.78 12.9
 -4 1 -1 187.88 14.4
 -4 1 -1 198.78 13.9
 -4 1 -1 185.48 13.8
 -4 1 -1 198.28 13.3
 -4 1 -1 195.78 13.2
 -4 1 -1 181.48 13.2
 -4 1 -1 207.38 14.6
 -4 1 -1 206.18 13.2
 -4 1 -1 191.38 13.6
 4 -1 1 218.18 14.2
 4 -1 1 196.28 14.6
 4 -1 1 176.78 14.5
 4 -1 1 211.28 12.9
 4 -1 1 176.58 13.8
 4 -1 1 212.88 14.8
 4 -1 1 195.68 13.4
 4 -1 1 225.78 15.7
 4 -1 1 198.08 13.2
 4 -1 1 239.78 16.4
 4 -1 1 202.78 13.5
 4 -1 1 192.78 13.1
 4 -1 1 183.38 14.6
 -3 1 -1 1059.39 63.79
 -3 1 -1 1030.4 63.39
 -3 1 -1 1013.4 63.89
 -3 1 -1 1130.19 62.89
 -3 1 -1 1121.99 63.59
 -3 1 -1 1037.6 63.79
 -3 1 -1 1037.3 64.29
 -3 1 -1 1056.09 63.49
 -3 1 -1 1139.49 63.39
 -3 1 -1 1098.29 64.29
 3 -1 1 1039.3 63.39
 3 -1 1 1046.3 63.69
 3 -1 1 1051.09 63.59
 3 -1 1 1097.89 64.09
 3 -1 1 1075.59 63.39
 3 -1 1 1024 64.29
 3 -1 1 1033.2 64.59
 3 -1 1 1055.79 64.49
 3 -1 1 1077.09 62.89
 3 -1 1 995.5 63.89
 3 -1 1 1153.08 65.59
 3 -1 1 994.9 64.29
 -2 1 -1 1205.38 69.79
 -2 1 -1 1252.27 69.69
 -2 1 -1 1173.48 69.99
 -2 1 -1 1094.09 69.59
 -2 1 -1 1113.39 69.89
 -2 1 -1 1213.48 70.09
 -2 1 -1 1095.69 70.09
 -2 1 -1 1193.98 69.79
 -2 1 -1 1116.49 69.69
 -2 1 -1 1203.18 68.99
 2 -1 1 1159.68 70.19
 2 -1 1 1132.09 69.69
 2 -1 1 1180.08 69.69
 2 -1 1 1196.78 69.09
 2 -1 1 1150.98 69.79
 2 -1 1 1353.66 71.49
 2 -1 1 1192.48 69.89
 2 -1 1 1141.99 70.29
 2 -1 1 1144.99 69.69
 -1 1 -1 70.49 5.3
 -1 1 -1 69.19 5.1
 -1 1 -1 66.59 4.5
 -1 1 -1 76.49 5.3
 -1 1 -1 79.69 5.1
 -1 1 -1 66.89 5.2
 -1 1 -1 67.69 5
 -1 1 -1 71.89 5.3
 -1 1 -1 79.49 5.5
 -1 1 -1 59.09 5.5
 -1 1 -1 66.29 5.1
 1 -1 1 72.69 5.2
 1 -1 1 73.79 5.4
 1 -1 1 72.19 5.3
 1 -1 1 72.79 5
 1 -1 1 70.59 5.1
 1 -1 1 76.69 5.4
 1 -1 1 67.29 5.1
 1 -1 1 67.89 4.5
 1 -1 1 66.49 5.1
 1 -1 1 75.69 5.4
 0 1 -1 2365.76 134.59
 0 1 -1 2213.28 134.59
 0 1 -1 2215.58 134.49
 0 1 -1 2380.46 134.39
 0 1 -1 2355.96 134.49
 0 1 -1 2347.57 134.69
 0 1 -1 2242.68 134.59
 0 1 -1 2293.47 134.29
 0 1 -1 2260.87 134.59
 0 1 -1 2250.57 134.29
 0 1 -1 2211.38 136.49
 0 1 -1 2313.77 134.59
 0 -1 1 2353.26 134.29
 0 -1 1 2105.19 134.59
 0 -1 1 2397.36 134.39
 0 -1 1 2282.87 134.59
 0 -1 1 2405.16 134.59
 0 -1 1 2201.78 134.29
 0 -1 1 2280.87 134.49
 0 -1 1 2286.17 134.19
 1 1 -1 555.34 32.9
 1 1 -1 623.24 32.8
 1 1 -1 494.55 32.9
 1 1 -1 527.45 33.3
 1 1 -1 485.95 32.9
 1 1 -1 634.34 33.3
 1 1 -1 516.65 33
 1 1 -1 539.85 32.9
 1 1 -1 549.45 32.9
 -1 -1 1 515.05 32.9
 -1 -1 1 594.34 32.4
 -1 -1 1 531.65 33
 -1 -1 1 517.05 33
 -1 -1 1 545.75 33
 -1 -1 1 643.74 33.2
 -1 -1 1 521.15 32.9
 -1 -1 1 530.65 32.9
 2 1 -1 117.19 7.6
 2 1 -1 114.49 7.2
 2 1 -1 124.99 8
 2 1 -1 119.39 7.5
 2 1 -1 114.19 8.4
 2 1 -1 119.49 7.3
 2 1 -1 115.19 7.8
 -2 -1 1 116.39 7.6
 -2 -1 1 111.99 7.6
 -2 -1 1 90.99 7.6
 -2 -1 1 118.49 7.9
 -2 -1 1 100.69 8.2
 -2 -1 1 116.69 7.4
 -2 -1 1 110.79 7.7
 -2 -1 1 113.59 8.2
 -2 -1 1 117.99 7.6
 3 1 -1 1570.94 99.19
 3 1 -1 1738.43 100.09
 3 1 -1 1800.02 98.09
 3 1 -1 1723.93 99.09
 3 1 -1 1678.13 98.09
 -3 -1 1 1814.92 99.19
 -3 -1 1 1635.24 98.59
 -3 -1 1 1724.93 98.49
 -3 -1 1 1686.53 98.99
 -3 -1 1 1491.15 99.89
 -3 -1 1 1594.74 98.49
 -3 -1 1 1660.63 99.49
 -3 -1 1 1600.34 98.49
 4 1 -1 2362.56 144.99
 4 1 -1 2367.26 145.39
 4 1 -1 2422.56 144.29
 4 1 -1 2533.75 147.79
 4 1 -1 2481.05 144.69
 4 1 -1 2477.85 144.99
 4 1 -1 2555.54 145.19
 -4 -1 1 2318.77 143.59
 -4 -1 1 2627.84 144.49
 -4 -1 1 2125.59 145.49
 -4 -1 1 2473.25 144.19
 -4 -1 1 2610.64 143.69
 -4 -1 1 2367.46 144.89
 5 1 -1 1741.33 108.09
 5 1 -1 1723.03 107.29
 5 1 -1 1767.12 106.29
 5 1 -1 1856.71 107.49
 5 1 -1 1790.62 107.89
 5 1 -1 1923.21 109.39
 5 1 -1 1737.43 107.59
 5 1 -1 1885.01 107.79
 5 1 -1 1828.02 106.99
 -5 -1 1 1815.62 107.19
 -5 -1 1 1971.1 105.89
 -5 -1 1 1818.42 106.29
 -5 -1 1 1934.71 106.59
 -5 -1 1 1647.24 108.09
 -5 -1 1 1724.73 105.79
 -5 -1 1 1556.04 107.19
 -5 -1 1 1734.03 105.59
 -5 -1 1 1719.03 105.59
 6 1 -1 93.09 10.2
 6 1 -1 90.19 11.2
 6 1 -1 63.09 8.5
 6 1 -1 68.09 7.2
 6 1 -1 66.29 6.8
 6 1 -1 69.89 8.3
 6 1 -1 71.49 8.9
 6 1 -1 74.19 6.3
 -6 -1 1 72.89 6.4
 -6 -1 1 69.29 5.8
 -6 -1 1 58.69 7.8
 -6 -1 1 65.89 9.1
 -6 -1 1 61.59 5.5
 -6 -1 1 57.29 5.3
 -6 -1 1 70.29 6.2
 -6 -1 1 64.29 5.5
 -6 -1 1 82.59 7.4
 7 1 -1 81.09 8.7
 7 1 -1 82.49 12.1
 7 1 -1 96.99 9.2
 7 1 -1 72.39 9.8
 7 1 -1 86.19 10.8
 7 1 -1 88.09 8.3
 7 1 -1 101.99 12
 -7 -1 1 72.89 6.6
 -7 -1 1 94.29 8.6
 -7 -1 1 92.59 11.5
 -7 -1 1 91.59 7
 -7 -1 1 86.99 7.6
 -7 -1 1 90.19 7.2
 -7 -1 1 82.79 6.6
 -7 -1 1 94.99 9.2
 -7 -1 1 77.39 7.2
 8 1 -1 88.79 10.4
 8 1 -1 103.69 10.5
 8 1 -1 100.69 12.2
 8 1 -1 91.09 12.4
 8 1 -1 109.09 13.2
 8 1 -1 89.89 9.9
 8 1 -1 111.49 14.6
 -8 -1 1 90.39 7.7
 -8 -1 1 101.59 8.5
 -8 -1 1 95.19 7.9
 -8 -1 1 104.99 13.2
 -8 -1 1 103.89 8.6
 -8 -1 1 98.79 9.7
 -8 -1 1 100.59 8.4
 -8 -1 1 113.29 12.4
 9 1 -1 59.19 10.4
 9 1 -1 38.2 9.9
 9 1 -1 33.7 8.3
 9 1 -1 24.3 7.3
 9 1 -1 41.7 7.1
 9 1 -1 38.4 7.8
 -9 -1 1 43.5 5.5
 -9 -1 1 39.6 5.6
 -9 -1 1 48.5 9
 -9 -1 1 42.6 5.8
 -9 -1 1 56.99 7.9
 -9 -1 1 41.4 5.5
 -9 -1 1 52.49 6.3
 -9 -1 1 42.8 5.3
 -9 -1 1 50.49 8.2
 10 1 -1 236.88 23
 10 1 -1 251.07 19.4
 10 1 -1 220.28 20.1
 10 1 -1 244.48 21.2
 10 1 -1 236.78 21.6
 10 1 -1 241.78 21.5
 -10 -1 1 262.17 20.7
 -10 -1 1 247.68 17.6
 -10 -1 1 269.07 18
 -10 -1 1 275.27 19.7
 -10 -1 1 264.07 17.6
 -10 -1 1 274.17 22.4
 -10 -1 1 231.98 16.9
 -10 -1 1 220.18 16.5
 11 1 -1 6.3 4.6
 11 1 -1 4.9 5.9
 11 1 -1 3.6 4.8
 11 1 -1 4.9 4.1
 11 1 -1 1.1 5.2
 11 1 -1 0.5 5.8
 -11 -1 1 -0.2 3.8
 -11 -1 1 2.5 2.5
 -11 -1 1 -2.2 3.3
 -11 -1 1 -3 2.6
 -11 -1 1 3.9 3.5
 -11 -1 1 -0.1 3.7
 -11 -1 1 6.1 2.6
 12 1 -1 56.19 10.7
 12 1 -1 59.09 12
 12 1 -1 48.7 9.4
 12 1 -1 74.29 14.9
 12 1 -1 70.89 12.7
 12 1 -1 53.89 12.4
 -12 -1 1 56.39 11.4
 -12 -1 1 60.89 7.3
 -12 -1 1 51.09 9.1
 -12 -1 1 73.99 11.9
 13 1 -1 15.4 7.2
 13 1 -1 26.5 7.6
 13 1 -1 38.3 11.2
 13 1 -1 58.49 12.6
 13 1 -1 29.4 10.8
 -13 -1 1 27.4 9.5
 -13 -1 1 35.4 5.9
 -13 -1 1 28.4 8.6
 -13 -1 1 23.4 8.3
 14 1 -1 268.87 22.7
 14 1 -1 258.07 27.6
 14 1 -1 239.28 30.5
 14 1 -1 315.87 27
 14 1 -1 300.77 29.1
 -14 -1 1 253.37 24.8
 -14 -1 1 252.57 23.9
 -14 -1 1 254.77 19.3
 -13 2 0 -2 4.7
 -13 2 0 -2.6 3.7
 -13 2 0 1.2 3
 -13 2 0 -5.2 5.1
 13 -2 0 -2.5 7.2
 13 -2 0 2.2 7.7
 13 -2 0 6 8.7
 -12 2 0 28 6.3
 -12 2 0 24.5 7.6
 -12 2 0 23.2 7.9
 -12 2 0 22.6 5.9
 12 -2 0 35.4 11.7
 12 -2 0 13.1 8.7
 12 -2 0 42.5 12.3
 12 -2 0 25.5 7.1
 -11 2 0 2.6 4.6
 -11 2 0 7.3 5.4
 -11 2 0 0.8 2.8
 -11 2 0 3.7 3.4
 11 -2 0 0.9 4.8
 11 -2 0 0.6 6.6
 11 -2 0 7.5 4.9
 11 -2 0 10.4 8.8
 11 -2 0 2 6.5
 -10 2 0 11.5 3.9
 -10 2 0 14.7 4.4
 -10 2 0 15.1 5.7
 -10 2 0 12.7 5.9
 -10 2 0 12.5 6.2
 -10 2 0 15.6 4.4
 10 -2 0 15.2 5.7
 10 -2 0 7.4 6.4
 10 -2 0 14.1 6
 10 -2 0 3.1 5.7
 10 -2 0 16.4 8
 -9 2 0 2.7 3
 -9 2 0 -1.9 2.7
 -9 2 0 -0.1 4.1
 -9 2 0 -2.1 2.9
 -9 2 0 -0.2 2.4
 -9 2 0 -2.4 2.1
 -9 2 0 -0.3 3.2
 -9 2 0 -1 3.6
 9 -2 0 -0.6 5.7
 9 -2 0 5.6 4
 9 -2 0 1.2 4.7
 9 -2 0 -6.4 4.7
 9 -2 0 4.7 5.6
 9 -2 0 -3.2 2.2
 9 -2 0 -2.7 5.3
 9 -2 0 -5.5 3.4
 -8 2 0 36.2 5.6
 -8 2 0 37.6 5.8
 -8 2 0 31.9 6.6
 -8 2 0 35.4 7.9
 -8 2 0 22.2 5.3
 -8 2 0 34.5 5.2
 -8 2 0 30.4 7.2
 -8 2 0 38.9 6.7
 -8 2 0 32.8 5.4
 8 -2 0 27.6 6.6
 8 -2 0 32.3 5.4
 8 -2 0 18 7.6
 8 -2 0 39.7 5.5
 8 -2 0 33.7 8.2
 8 -2 0 30.9 6.6
 8 -2 0 24.4 7.8
 8 -2 0 31.1 9.4
 8 -2 0 26.8 5.1
 8 -2 0 26.8 7.4
 -7 2 0 142.49 13.4
 -7 2 0 143.59 12.1
 -7 2 0 144.19 11.3
 -7 2 0 142.69 11.3
 -7 2 0 137.09 11.2
 -7 2 0 147.69 13.7
 -7 2 0 151.08 9.3
 -7 2 0 141.79 11.1
 -7 2 0 135.69 12.5
 7 -2 0 144.39 13.9
 7 -2 0 133.99 14.5
 7 -2 0 122.49 12
 7 -2 0 160.58 11.5
 7 -2 0 152.28 11.4
 7 -2 0 125.69 13.6
 7 -2 0 125.79 13.1
 7 -2 0 134.39 11.2
 7 -2 0 148.99 13.4
 7 -2 0 158.88 15.4
 -6 2 0 44.4 6.3
 -6 2 0 38 6.8
 -6 2 0 31.2 6.1
 -6 2 0 37.1 5.2
 -6 2 0 37.1 5
 -6 2 0 43.7 5.1
 -6 2 0 28.9 5.3
 -6 2 0 31.9 5
 -6 2 0 35.1 3.3
 6 -2 0 41.2 5.2
 6 -2 0 34.9 5.1
 6 -2 0 32.8 5
 6 -2 0 42.9 8.8
 6 -2 0 41.8 6.4
 6 -2 0 36.1 6.5
 6 -2 0 44.6 8.3
 6 -2 0 42.3 7.9
 6 -2 0 24.2 6.2
 6 -2 0 39.8 6.9
 -5 2 0 11 2.9
 -5 2 0 10.1 3.3
 -5 2 0 8.3 3.2
 -5 2 0 10.3 2.8
 -5 2 0 12.8 1.8
 -5 2 0 12.2 3.9
 -5 2 0 10 2.8
 -5 2 0 16.9 3
 -5 2 0 4.8 2.7
 -5 2 0 12.9 3.4
 5 -2 0 17.9 5.7
 5 -2 0 8.2 3.1
 5 -2 0 13.5 4.2
 5 -2 0 13 3.2
 5 -2 0 18.3 4.5
 5 -2 0 14 3.8
 5 -2 0 14.4 3
 5 -2 0 11.9 4.1
 5 -2 0 12.3 3
 5 -2 0 12.1 3.7
 5 -2 0 13 4.6
 -4 2 0 109.89 8.3
 -4 2 0 105.39 8.3
 -4 2 0 107.69 7
 -4 2 0 103.89 8.7
 -4 2 0 101.69 8.7
 -4 2 0 97.49 8.1
 -4 2 0 115.09 9.6
 -4 2 0 101.19 9.3
 -4 2 0 116.19 7.9
 -4 2 0 101.89 9.2
 4 -2 0 101.69 9.5
 4 -2 0 110.09 10.5
 4 -2 0 117.59 10.5
 4 -2 0 111.69 9.1
 4 -2 0 108.99 9.8
 4 -2 0 95.09 8.8
 4 -2 0 101.69 8.2
 4 -2 0 111.59 8.1
 4 -2 0 108.19 8.4
 4 -2 0 113.29 9.1
 4 -2 0 107.79 8.2
 4 -2 0 99.29 9.5
 4 -2 0 108.79 8.6
 -3 2 0 212.98 13.8
 -3 2 0 215.38 14.8
 -3 2 0 208.98 13.8
 -3 2 0 217.68 13.3
 -3 2 0 213.38 14.6
 -3 2 0 209.08 12.7
 -3 2 0 221.68 14.8
 -3 2 0 216.28 13.9
 -3 2 0 203.88 14.1
 -3 2 0 223.08 14.4
 3 -2 0 215.88 13.5
 3 -2 0 196.58 14.5
 3 -2 0 207.08 13.8
 3 -2 0 202.98 13.8
 3 -2 0 197.88 13.8
 3 -2 0 159.98 13.7
 3 -2 0 183.58 14.1
 3 -2 0 210.08 14.4
 3 -2 0 211.18 14.8
 3 -2 0 195.68 14.8
 3 -2 0 205.38 14.3
 -2 2 0 160.58 10.8
 -2 2 0 168.28 10
 -2 2 0 164.48 10.9
 -2 2 0 169.08 11.6
 -2 2 0 154.58 11.1
 -2 2 0 153.98 12.4
 -2 2 0 168.28 11.3
 -2 2 0 154.38 10.2
 -2 2 0 167.98 11.4
 -2 2 0 164.98 11
 -2 2 0 166.08 10.9
 2 -2 0 156.88 10.8
 2 -2 0 152.08 10.8
 2 -2 0 155.88 11.1
 2 -2 0 158.28 11.5
 2 -2 0 163.38 10.1
 2 -2 0 161.48 11.2
 2 -2 0 160.28 11.1
 2 -2 0 164.38 10.4
 2 -2 0 149.88 10.8
 2 -2 0 155.78 11
 2 -2 0 133.19 11.3
 -1 2 0 29.2 3.3
 -1 2 0 23.5 3.1
 -1 2 0 30.3 3.8
 -1 2 0 33.2 3.5
 -1 2 0 34.5 4.9
 -1 2 0 33.1 3.3
 -1 2 0 28.2 3.2
 -1 2 0 35.1 3.9
 -1 2 0 34.4 3.8
 -1 2 0 30.5 2.8
 1 -2 0 32.8 3.8
 1 -2 0 34.8 3.3
 1 -2 0 25.5 2.7
 1 -2 0 24.1 3.2
 1 -2 0 23.8 3.9
 1 -2 0 25.7 3.2
 1 -2 0 25.5 3.5
 1 -2 0 30 3.8
 1 -2 0 30.2 2.8
 1 -2 0 24.3 3.2
 1 -2 0 32.2 3.3
 0 2 0 946.81 54.79
 0 2 0 903.51 54.29
 0 2 0 971.2 54.79
 0 2 0 846.02 54.69
 0 2 0 977.3 55.09
 0 2 0 918.01 54.89
 0 2 0 955.9 54.69
 0 2 0 898.41 54.69
 0 2 0 905.71 54.69
 0 2 0 867.41 54.59
 0 2 0 978 55.79
 0 2 0 841.12 54.39
 0 2 0 956 54.59
 0 -2 0 975.8 54.99
 0 -2 0 961.7 54.79
 0 -2 0 876.51 54.69
 0 -2 0 1004.9 54.59
 0 -2 0 863.31 54.69
 0 -2 0 895.21 54.69
 0 -2 0 892.71 54.89
 0 -2 0 963.6 55.69
 0 -2 0 866.41 54.29
 0 -2 0 887.91 54.69
 1 2 0 5038.1 288.87
 1 2 0 4901.21 289.17
 1 2 0 5221.78 290.07
 1 2 0 4938.01 288.47
 1 2 0 4742.93 288.47
 1 2 0 4686.33 288.97
 1 2 0 5119.89 288.67
 1 2 0 4712.83 289.57
 1 2 0 4690.03 289.07
 -1 -2 0 5149.38 289.17
 -1 -2 0 5209.08 288.57
 -1 -2 0 5073.89 288.37
 -1 -2 0 4745.02 288.67
 -1 -2 0 4682.53 289.07
 -1 -2 0 4886.31 288.47
 -1 -2 0 5082.49 291.57
 -1 -2 0 4894.31 288.57
 -1 -2 0 4838.12 288.47
 2 2 0 3648.54 240.68
 2 2 0 4495.45 239.18
 2 2 0 4511.95 238.38
 2 2 0 4095.59 238.38
 2 2 0 3990.1 239.68
 -2 -2 0 3888.11 239.18
 -2 -2 0 3778.12 239.58
 -2 -2 0 4187.78 238.58
 -2 -2 0 3993.9 240.78
 -2 -2 0 4064.19 238.78
 -2 -2 0 4113.59 238.48
 3 2 0 542.85 31
 3 2 0 518.35 31.7
 3 2 0 521.85 31.9
 -3 -2 0 432.56 33
 -3 -2 0 528.95 31.2
 4 2 0 205.28 15.3
 4 2 0 219.18 15
 4 2 0 216.18 14.4
 4 2 0 232.38 13.6
 4 2 0 200.58 14.7
 4 2 0 224.08 14.8
 -4 -2 0 192.68 14.9
 -4 -2 0 167.58 16.1
 -4 -2 0 217.58 14
 5 2 0 266.77 19.9
 5 2 0 296.47 18.1
 5 2 0 291.37 20.2
 5 2 0 283.37 19.8
 5 2 0 284.17 20.4
 5 2 0 290.37 18.6
 5 2 0 283.67 19.9
 5 2 0 302.07 20.1
 5 2 0 283.37 19.6
 -5 -2 0 287.57 19.2
 -5 -2 0 264.47 20.1
 -5 -2 0 287.77 18.7
 6 2 0 33.9 5.9
 6 2 0 31.2 5.6
 6 2 0 37.1 6.1
 6 2 0 32 4.6
 6 2 0 29.6 5.3
 6 2 0 49.4 7.1
 6 2 0 39.4 4.2
 6 2 0 43 7.3
 6 2 0 37.1 6.6
 -6 -2 0 25.8 5.9
 -6 -2 0 34.2 4.5
 -6 -2 0 29.9 2.9
 -6 -2 0 27.1 5
 -6 -2 0 33.3 3.1
 -6 -2 0 26.7 5
 7 2 0 2.3 2.6
 7 2 0 2.2 3.7
 7 2 0 0.8 2.8
 7 2 0 -0.3 3.1
 7 2 0 5.5 3.2
 7 2 0 3.1 2.4
 7 2 0 3 2.9
 7 2 0 2.6 1.5
 7 2 0 3 2.9
 -7 -2 0 2 1.4
 -7 -2 0 3.9 2.8
 -7 -2 0 0.4 1.6
 -7 -2 0 3.3 1.6
 -7 -2 0 4.6 2.9
 -7 -2 0 7.6 3.8
 8 2 0 -2.9 2.5
 8 2 0 1.4 2.4
 8 2 0 8.6 4.8
 8 2 0 2.1 3.8
 8 2 0 7.6 5
 8 2 0 6 3.8
 8 2 0 6.1 3.8
 -8 -2 0 5 1.9
 -8 -2 0 2.5 3
 -8 -2 0 4.9 2.5
 -8 -2 0 1.1 2.9
 -8 -2 0 0.4 2.6
 -8 -2 0 8.4 3.6
 -8 -2 0 6.9 3.9
 -8 -2 0 4 1.5
 9 2 0 32.9 8.3
 9 2 0 16.2 4.3
 9 2 0 12.3 5.4
 9 2 0 12.2 6
 9 2 0 13.9 4.8
 9 2 0 19.3 6
 9 2 0 17.4 6.2
 -9 -2 0 12.2 4.1
 -9 -2 0 16.3 3.3
 -9 -2 0 16.4 2.9
 -9 -2 0 16 3.8
 -9 -2 0 5.9 4.4
 -9 -2 0 15.2 4.4
 -9 -2 0 16.2 4.6
 -9 -2 0 15.1 4.9
 10 2 0 34.7 9
 10 2 0 32.3 8.7
 10 2 0 33.5 8.1
 10 2 0 31 7.8
 10 2 0 36.3 8
 10 2 0 24.9 7.9
 10 2 0 32.7 6.2
 -10 -2 0 25.8 4.9
 -10 -2 0 18.2 6.5
 -10 -2 0 20.2 5.6
 -10 -2 0 29.2 7
 -10 -2 0 34.9 4.5
 -10 -2 0 36.9 5
 -10 -2 0 29 5.6
 -10 -2 0 42.6 7.1
 11 2 0 -3.3 3.4
 11 2 0 2.6 3.4
 11 2 0 1.2 5.7
 11 2 0 7.9 5.9
 11 2 0 10.8 5.8
 11 2 0 5.1 5.7
 -11 -2 0 7.5 4.3
 -11 -2 0 1.1 3
 -11 -2 0 0.4 3.9
 -11 -2 0 -0.1 4.6
 -11 -2 0 10.4 5.2
 -11 -2 0 3.4 2.2
 -11 -2 0 4.7 4.4
 -11 -2 0 7.3 3.4
 -11 -2 0 0.5 2.2
 12 2 0 7.7 5.4
 12 2 0 11.3 6.8
 12 2 0 10.4 6.9
 12 2 0 6.8 4.6
 12 2 0 7 7.1
 12 2 0 1.7 4.3
 -12 -2 0 8.6 3.2
 -12 -2 0 8.4 4.8
 -12 -2 0 7.9 3.5
 -12 -2 0 1.2 4.3
 -12 -2 0 1.1 4.1
 13 2 0 0 4.4
 13 2 0 13.4 7.4
 13 2 0 13.3 7.5
 13 2 0 14.3 6.2
 13 2 0 11.2 8.1
 13 2 0 12.7 7.7
 -13 -2 0 19.7 6.8
 -13 -2 0 10.8 3.6
 -13 -2 0 8.5 7.3
 -13 -2 0 6.8 5.9
 14 2 0 59.09 14.6
 14 2 0 48.3 13
 14 2 0 48.3 12.6
 14 2 0 31.9 9.7
 14 2 0 50.59 11.9
 14 2 0 33.4 8.5
 -14 -2 0 46.8 6.3
 -14 -2 0 54.39 11.6
 -14 -2 0 25 8.6
 -13 3 1 24.6 8
 -13 3 1 16.9 6
 -13 3 1 25.6 6.2
 -13 3 1 15.3 7.8
 13 -3 -1 17.9 11.1
 13 -3 -1 33.7 12.5
 13 -3 -1 14.5 10
 13 -3 -1 16.9 7.4
 -12 3 1 -1.4 4.7
 -12 3 1 1.2 4.6
 -12 3 1 3.4 3.5
 -12 3 1 9.6 3.7
 12 -3 -1 1.2 7.7
 12 -3 -1 0.1 4.7
 12 -3 -1 14.8 8.7
 12 -3 -1 4.6 6.8
 -11 3 1 -2.6 4.1
 -11 3 1 1 4.2
 -11 3 1 0.2 2.9
 -11 3 1 4.7 3.5
 11 -3 -1 6 7.5
 11 -3 -1 -4.7 3.8
 11 -3 -1 7.1 7.2
 11 -3 -1 11.9 7.7
 -10 3 1 62.29 8.5
 -10 3 1 67.09 8.2
 -10 3 1 38.8 10.7
 -10 3 1 42.2 7.1
 -10 3 1 38.6 8.3
 -10 3 1 63.79 10.8
 10 -3 -1 51.29 12.5
 10 -3 -1 42.2 11
 10 -3 -1 42.6 9.3
 10 -3 -1 41.9 10.9
 -9 3 1 30.8 7.8
 -9 3 1 19.1 4.9
 -9 3 1 27.2 6.9
 -9 3 1 29.9 5.6
 -9 3 1 20.7 8.1
 -9 3 1 46.8 9.5
 -9 3 1 23.6 5.5
 9 -3 -1 26.8 7.9
 9 -3 -1 24.5 5.3
 9 -3 -1 16.4 8.2
 9 -3 -1 14.9 7.5
 9 -3 -1 17.1 6.1
 -8 3 1 252.07 18
 -8 3 1 223.18 18
 -8 3 1 245.78 18.3
 -8 3 1 254.37 18.3
 -8 3 1 261.07 21.2
 -8 3 1 221.18 22
 -8 3 1 255.87 20.9
 -8 3 1 271.37 19.7
 -8 3 1 274.77 20.2
 8 -3 -1 247.88 21.2
 8 -3 -1 238.88 18
 8 -3 -1 262.77 23.4
 8 -3 -1 252.47 22.3
 8 -3 -1 255.47 18.2
 8 -3 -1 259.57 20
 8 -3 -1 225.38 21.3
 -7 3 1 24.1 5.6
 -7 3 1 31.9 6.3
 -7 3 1 28.9 5
 -7 3 1 27.2 4.7
 -7 3 1 21.7 6
 -7 3 1 23.7 5
 -7 3 1 28.6 6.7
 -7 3 1 20.2 6.6
 -7 3 1 24.8 4.9
 7 -3 -1 18.7 7.7
 7 -3 -1 10.2 4.1
 7 -3 -1 28.2 5
 7 -3 -1 26.5 5.3
 7 -3 -1 27.2 7.7
 7 -3 -1 23.5 4.8
 7 -3 -1 32.8 7.6
 7 -3 -1 14.6 5.6
 7 -3 -1 13.1 5.4
 -6 3 1 110.79 10.5
 -6 3 1 109.69 9.7
 -6 3 1 122.79 11.8
 -6 3 1 112.79 9.7
 -6 3 1 121.19 9.6
 -6 3 1 121.79 9.8
 -6 3 1 102.99 12.4
 -6 3 1 122.89 10.7
 6 -3 -1 98.79 12.6
 6 -3 -1 119.69 12.4
 6 -3 -1 124.69 13.4
 6 -3 -1 107.79 11.2
 6 -3 -1 116.99 9.7
 6 -3 -1 107.49 7.4
 6 -3 -1 108.69 9.7
 6 -3 -1 116.99 11.4
 6 -3 -1 111.29 9.9
 6 -3 -1 126.79 11.1
 -5 3 1 66.69 7.8
 -5 3 1 60.69 6.5
 -5 3 1 82.29 9
 -5 3 1 69.59 7.7
 -5 3 1 68.79 9.1
 -5 3 1 77.99 6.6
 -5 3 1 78.99 8.8
 -5 3 1 60.59 7.2
 -5 3 1 56.29 8.2
 5 -3 -1 57.09 8.5
 5 -3 -1 64.59 8.1
 5 -3 -1 74.59 11.2
 5 -3 -1 59.69 8.7
 5 -3 -1 64.39 4.7
 5 -3 -1 52.79 8
 5 -3 -1 68.09 6.7
 5 -3 -1 72.79 6.8
 5 -3 -1 62.19 7.5
 -4 3 1 -1.6 2
 -4 3 1 0.2 1.9
 -4 3 1 3.1 2.3
 -4 3 1 0.2 1.7
 -4 3 1 -1.1 1.5
 -4 3 1 3.5 2.1
 -4 3 1 1.1 2.6
 -4 3 1 -0.7 1.8
 -4 3 1 0.4 1.8
 4 -3 -1 -0.2 0.9
 4 -3 -1 -0.9 2.6
 4 -3 -1 -1.6 2.3
 4 -3 -1 -2.1 1.5
 4 -3 -1 1 2.3
 4 -3 -1 -0.8 1.7
 4 -3 -1 -3 3.6
 4 -3 -1 -0.6 1.2
 4 -3 -1 -2.3 2.1
 4 -3 -1 0.9 2.5
 4 -3 -1 -1.7 1.8
 -3 3 1 7.4 2.6
 -3 3 1 11.3 2.7
 -3 3 1 8.4 2.9
 -3 3 1 4.3 2.1
 -3 3 1 8.5 2.8
 -3 3 1 5.5 3.4
 -3 3 1 5.5 2.7
 -3 3 1 6.8 2.2
 -3 3 1 7 2.8
 3 -3 -1 5.3 3.1
 3 -3 -1 8.3 1.6
 3 -3 -1 9.7 2.9
 3 -3 -1 7.3 1.3
 3 -3 -1 5.6 2.5
 3 -3 -1 6.9 2.6
 3 -3 -1 11.1 3.2
 3 -3 -1 10.1 2.9
 3 -3 -1 6.3 2.2
 3 -3 -1 7.1 3.1
 3 -3 -1 7.8 2.8
 3 -3 -1 8.3 2.7
 3 -3 -1 9.2 2.6
 -2 3 1 31.4 4
 -2 3 1 31.4 4.4
 -2 3 1 32.7 5.4
 -2 3 1 25.3 3.6
 -2 3 1 27.8 3.5
 -2 3 1 29.3 3.8
 -2 3 1 26.4 3.9
 -2 3 1 33.4 4.7
 -2 3 1 31.1 4.3
 2 -3 -1 25.2 4.4
 2 -3 -1 30.7 3.8
 2 -3 -1 28.7 4.3
 2 -3 -1 29.5 4.2
 2 -3 -1 23.8 3.8
 2 -3 -1 24.7 2.6
 2 -3 -1 26.3 3.8
 2 -3 -1 29.8 4.1
 2 -3 -1 32 4.6
 2 -3 -1 23.2 3.9
 2 -3 -1 20.8 4.6
 2 -3 -1 29.1 4.3
 2 -3 -1 28.5 4.4
 -1 3 1 216.78 14.3
 -1 3 1 217.78 13.8
 -1 3 1 210.08 13.6
 -1 3 1 213.18 14
 -1 3 1 227.28 15.6
 -1 3 1 212.58 13.5
 -1 3 1 194.48 13.3
 -1 3 1 205.08 13.8
 -1 3 1 243.88 14.4
 -1 3 1 198.78 13.8
 -1 3 1 195.58 13.7
 1 -3 -1 212.18 14.3
 1 -3 -1 192.48 13.7
 1 -3 -1 208.98 14.1
 1 -3 -1 182.18 13.2
 1 -3 -1 201.08 13.8
 1 -3 -1 225.78 14.3
 1 -3 -1 213.38 14.3
 1 -3 -1 196.28 13.8
 1 -3 -1 201.08 15.1
 1 -3 -1 203.58 13.8
 1 -3 -1 185.88 13.3
 1 -3 -1 211.88 13.7
 0 3 1 1697.43 103.69
 0 3 1 1829.02 103.49
 0 3 1 1713.53 103.89
 0 3 1 1904.91 103.79
 0 3 1 1697.43 104.09
 0 3 1 1623.64 103.09
 0 3 1 1705.43 103.69
 0 3 1 1791.12 104.29
 0 3 1 1795.92 103.79
 0 3 1 1752.92 103.79
 0 3 1 1805.92 105.49
 0 -3 -1 1719.23 103.79
 0 -3 -1 1831.42 104.29
 0 -3 -1 1644.84 103.59
 0 -3 -1 1804.12 105.29
 0 -3 -1 1747.73 104.19
 0 -3 -1 1657.13 103.79
 0 -3 -1 1805.52 103.59
 0 -3 -1 1651.23 103.69
 0 -3 -1 1864.31 103.89
 1 3 1 -1.5 1.3
 1 3 1 2 1.9
 1 3 1 0.5 0.7
 1 3 1 1.7 1.6
 1 3 1 1.5 1.5
 1 3 1 1.1 1.8
 1 3 1 -0.2 1.1
 1 3 1 1 1.2
 1 3 1 -0.6 0.5
 1 3 1 -1.1 1.2
 1 3 1 1.3 2.2
 -1 -3 -1 -1.6 1.6
 -1 -3 -1 -1.9 1.2
 -1 -3 -1 0.8 2.1
 -1 -3 -1 -0.1 1.7
 -1 -3 -1 2.2 1.3
 -1 -3 -1 0.2 1.4
 -1 -3 -1 0 0.7
 -1 -3 -1 -0.7 1.4
 -1 -3 -1 0.2 1.4
 2 3 1 2251.77 143.79
 2 3 1 2431.16 143.09
 2 3 1 2479.25 142.99
 2 3 1 2689.83 144.19
 2 3 1 2474.75 143.19
 2 3 1 2037.7 144.39
 2 3 1 2453.35 142.89
 2 3 1 2607.04 144.39
 2 3 1 2441.46 143.09
 2 3 1 2234.78 146.09
 -2 -3 -1 2524.35 143.19
 -2 -3 -1 2450.15 143.39
 -2 -3 -1 2550.34 143.19
 -2 -3 -1 2391.46 143.89
 -2 -3 -1 2430.36 143.09
 -2 -3 -1 2461.15 146.39
 -2 -3 -1 2557.34 142.89
 -2 -3 -1 2353.16 144.69
 3 3 1 66.79 5.6
 3 3 1 53.39 8
 3 3 1 63.89 5.8
 3 3 1 64.59 6.8
 3 3 1 66.79 6.5
 -3 -3 -1 61.09 8.1
 -3 -3 -1 48.9 6.6
 -3 -3 -1 60.29 5.9
 -3 -3 -1 60.79 4.2
 -3 -3 -1 64.49 4.6
 -3 -3 -1 58.49 4.7
 4 3 1 514.85 31.4
 4 3 1 462.95 31.4
 4 3 1 511.95 32.1
 4 3 1 521.35 31
 4 3 1 510.65 31.4
 4 3 1 516.55 32.1
 -4 -3 -1 422.86 34.1
 -4 -3 -1 500.95 30.5
 5 3 1 17.6 4
 5 3 1 10.9 3.4
 5 3 1 13.4 3.6
 5 3 1 13.3 3.6
 5 3 1 20.3 4.7
 5 3 1 11.5 3.8
 5 3 1 17 4.1
 5 3 1 9.6 2.9
 -5 -3 -1 10.2 3.3
 -5 -3 -1 13.5 2.8
 -5 -3 -1 14.1 3.2
 -5 -3 -1 4 3.5
 6 3 1 377.06 26.3
 6 3 1 383.46 26.4
 6 3 1 374.06 26.7
 6 3 1 396.06 27.1
 6 3 1 413.96 26.6
 6 3 1 407.36 24.5
 6 3 1 377.06 26.2
 6 3 1 396.36 26.2
 6 3 1 406.16 24.8
 -6 -3 -1 361.66 26.3
 -6 -3 -1 311.97 28.9
 -6 -3 -1 397.36 25.2
 -6 -3 -1 418.16 25.2
 7 3 1 -0.8 3
 7 3 1 -1.3 2.1
 7 3 1 -2.4 2.4
 7 3 1 -2.8 2.6
 7 3 1 -1.2 1.6
 7 3 1 2 2.7
 7 3 1 1.1 2.7
 7 3 1 3.6 2.9
 7 3 1 0.2 1.7
 -7 -3 -1 3.7 2.3
 -7 -3 -1 -0.3 2
 -7 -3 -1 0.4 1.8
 -7 -3 -1 0.4 2.3
 -7 -3 -1 0.1 2.2
 8 3 1 26.5 4.6
 8 3 1 13.6 4.9
 8 3 1 27.5 7
 8 3 1 20 5.4
 8 3 1 24.3 4
 8 3 1 25.9 6.7
 8 3 1 31 7.1
 8 3 1 20.5 5.4
 8 3 1 27.5 6
 -8 -3 -1 17.3 4.7
 -8 -3 -1 17.4 4.5
 -8 -3 -1 27.3 5.3
 -8 -3 -1 23.6 2.8
 -8 -3 -1 19.4 4.1
 -8 -3 -1 22.1 5.8
 9 3 1 255.57 17.2
 9 3 1 243.68 20.5
 9 3 1 250.17 21
 9 3 1 258.37 18.2
 9 3 1 284.07 20.9
 9 3 1 234.78 20.2
 9 3 1 225.78 20.7
 9 3 1 253.47 20.9
 9 3 1 274.47 22.2
 -9 -3 -1 266.47 19.3
 -9 -3 -1 258.57 18.3
 -9 -3 -1 255.97 16.1
 -9 -3 -1 227.58 20.5
 -9 -3 -1 276.37 19.4
 -9 -3 -1 275.37 16.6
 -9 -3 -1 243.68 19.6
 10 3 1 746.73 50.09
 10 3 1 730.83 49.99
 10 3 1 737.93 44.8
 10 3 1 755.62 50.79
 10 3 1 735.83 50.19
 10 3 1 748.53 46.6
 10 3 1 770.62 49.5
 10 3 1 715.43 49.3
 -10 -3 -1 752.22 47.6
 -10 -3 -1 717.43 46.1
 -10 -3 -1 715.73 47.6
 -10 -3 -1 722.73 44.1
 -10 -3 -1 622.14 47.5
 -10 -3 -1 731.43 49.7
 -10 -3 -1 751.12 44.6
 -10 -3 -1 744.63 49.1
 11 3 1 34.6 6.3
 11 3 1 34.2 8.9
 11 3 1 28.4 8.3
 11 3 1 43 9.8
 11 3 1 28.3 7.2
 11 3 1 38.4 9.9
 11 3 1 22.5 7
 -11 -3 -1 32.9 6.6
 -11 -3 -1 41.7 5
 -11 -3 -1 32.8 4.2
 -11 -3 -1 32.8 6.6
 -11 -3 -1 38.3 8.5
 -11 -3 -1 31.4 7.3
 -11 -3 -1 38.8 6
 -11 -3 -1 34.9 7.4
 -11 -3 -1 25 7.5
 12 3 1 5.1 3.8
 12 3 1 -2.8 3.3
 12 3 1 -0.1 5.5
 12 3 1 -2.3 5.7
 12 3 1 1 5.3
 12 3 1 3.5 5.6
 12 3 1 -2.3 5.2
 -12 -3 -1 1.6 4.7
 -12 -3 -1 0.5 5.7
 -12 -3 -1 1.7 4.9
 -12 -3 -1 -5.1 2.7
 -12 -3 -1 2.8 2.5
 -12 -3 -1 -3.3 4
 -12 -3 -1 -1 3.5
 -12 -3 -1 -0.8 1.6
 13 3 1 2 7.2
 13 3 1 4.1 4.3
 13 3 1 1.6 6.3
 13 3 1 23.2 8.1
 13 3 1 -3.1 5.3
 13 3 1 7.9 6.8
 -13 -3 -1 4.8 2.6
 -13 -3 -1 5 3
 -13 -3 -1 3.5 4.7
 -13 -3 -1 4.4 6.6
 -13 -3 -1 4.7 5.3
 -13 -3 -1 10 6
 14 3 1 233.88 24.6
 14 3 1 239.38 24.7
 14 3 1 235.88 23
 14 3 1 248.38 25
 -14 -3 -1 258.27 23.6
 -14 -3 -1 244.28 17.1
 -14 -3 -1 250.47 22.5
 -12 4 2 1.7 4.7
 -12 4 2 4 3.1
 -12 4 2 5.8 6
 -12 4 2 0.1 3.7
 12 -4 -2 -4 4.7
 12 -4 -2 -2.8 8.1
 12 -4 -2 3.1 8.1
 12 -4 -2 2.1 7.2
 -11 4 2 31.1 7.4
 -11 4 2 9.6 6.8
 -11 4 2 27.5 8.3
 -11 4 2 31.3 6.9
 11 -4 -2 47.3 12.7
 11 -4 -2 46.9 12
 11 -4 -2 35.2 12.4
 11 -4 -2 25.9 8
 -10 4 2 -3.4 5.9
 -10 4 2 4.2 3.8
 -10 4 2 2 3.4
 -10 4 2 1.4 3.5
 -10 4 2 1.6 4.9
 -10 4 2 5.8 5.1
 10 -4 -2 1.7 6.6
 10 -4 -2 -1.9 6.3
 10 -4 -2 8 5.5
 10 -4 -2 -12.4 3.9
 -9 4 2 14.6 8
 -9 4 2 12.1 4.6
 -9 4 2 16.2 5.3
 -9 4 2 15.7 6.1
 -9 4 2 7.8 4
 -9 4 2 18.4 5.9
 9 -4 -2 10.3 4.5
 9 -4 -2 5.4 6.5
 9 -4 -2 17.3 8.8
 9 -4 -2 4.5 5.9
 9 -4 -2 10.8 5.8
 -8 4 2 4.6 3.6
 -8 4 2 7.1 3.7
 -8 4 2 1.1 3.2
 -8 4 2 -0.8 3.7
 -8 4 2 -0.4 3.1
 -8 4 2 -1.7 3.7
 -8 4 2 -0.6 5.3
 8 -4 -2 2.6 5.9
 8 -4 -2 1.6 3.2
 8 -4 -2 6.8 4.5
 8 -4 -2 -2.4 5.2
 8 -4 -2 -1.7 4.1
 -7 4 2 104.29 10
 -7 4 2 77.99 10.9
 -7 4 2 92.79 11.3
 -7 4 2 88.69 9.6
 -7 4 2 114.79 13.9
 -7 4 2 132.59 10.2
 -7 4 2 108.79 9.9
 -7 4 2 79.69 11.2
 7 -4 -2 102.69 12.7
 7 -4 -2 94.79 15
 7 -4 -2 115.59 14.5
 7 -4 -2 97.89 7.1
 7 -4 -2 98.59 13.3
 7 -4 -2 89.79 13.2
 7 -4 -2 100.99 10.1
 7 -4 -2 106.39 9.9
 -6 4 2 65.39 8.6
 -6 4 2 68.59 8.2
 -6 4 2 62.19 7.8
 -6 4 2 62.29 8.9
 -6 4 2 58.59 7.6
 -6 4 2 72.29 10.7
 -6 4 2 82.29 7.5
 -6 4 2 52.29 8.7
 6 -4 -2 64.89 10.1
 6 -4 -2 62.09 11.6
 6 -4 -2 70.39 9.2
 6 -4 -2 62.49 5
 6 -4 -2 58.29 9.2
 6 -4 -2 51.39 7.5
 6 -4 -2 51.19 7.5
 -5 4 2 85.69 7.9
 -5 4 2 83.59 8.1
 -5 4 2 69.69 8.5
 -5 4 2 73.59 9.5
 -5 4 2 63.49 8.6
 -5 4 2 86.89 7.6
 -5 4 2 80.79 7.8
 -5 4 2 89.09 10.8
 5 -4 -2 82.99 9.5
 5 -4 -2 49.1 7.7
 5 -4 -2 71.69 10
 5 -4 -2 80.49 8.1
 5 -4 -2 75.39 11.9
 5 -4 -2 66.29 8.1
 5 -4 -2 83.09 6
 5 -4 -2 58.09 9
 -4 4 2 225.68 15.9
 -4 4 2 230.18 17
 -4 4 2 222.38 16.1
 -4 4 2 243.18 16.6
 -4 4 2 223.28 15.9
 -4 4 2 252.37 18.8
 -4 4 2 225.48 16
 -4 4 2 219.08 15.3
 -4 4 2 194.88 16.2
 4 -4 -2 221.78 14.3
 4 -4 -2 206.68 16.2
 4 -4 -2 211.08 17.2
 4 -4 -2 213.58 15.9
 4 -4 -2 217.18 15.8
 4 -4 -2 248.68 19.3
 4 -4 -2 177.48 16.1
 4 -4 -2 215.58 17.1
 4 -4 -2 213.38 16.5
 4 -4 -2 227.98 16.7
 -3 4 2 118.59 9.5
 -3 4 2 112.19 9.3
 -3 4 2 130.29 10.4
 -3 4 2 138.99 11.9
 -3 4 2 106.19 9.9
 -3 4 2 115.49 9.4
 -3 4 2 117.59 9.8
 -3 4 2 123.69 9.9
 -3 4 2 118.59 8.3
 -3 4 2 122.49 9.4
 -3 4 2 116.29 8.9
 3 -4 -2 93.99 9.3
 3 -4 -2 112.69 9.2
 3 -4 -2 103.39 10.2
 3 -4 -2 122.79 8.2
 3 -4 -2 119.99 9.6
 3 -4 -2 113.49 9.6
 3 -4 -2 102.89 9.5
 3 -4 -2 98.09 10.7
 3 -4 -2 101.99 7.4
 3 -4 -2 105.49 9.7
 3 -4 -2 118.89 10.2
 3 -4 -2 125.59 9.8
 3 -4 -2 102.69 9.2
 3 -4 -2 107.69 9.9
 -2 4 2 200.88 13.8
 -2 4 2 192.28 14
 -2 4 2 185.98 13.1
 -2 4 2 188.68 13.8
 -2 4 2 196.28 13.4
 -2 4 2 223.68 16
 -2 4 2 191.38 13.6
 -2 4 2 190.88 14.3
 -2 4 2 206.98 14.2
 -2 4 2 209.48 13.1
 -2 4 2 193.18 13.7
 2 -4 -2 188.58 13.6
 2 -4 -2 193.28 14.3
 2 -4 -2 183.28 13.9
 2 -4 -2 195.88 14.1
 2 -4 -2 176.48 15.1
 2 -4 -2 215.78 13.9
 2 -4 -2 176.48 13.7
 2 -4 -2 175.78 14.1
 2 -4 -2 168.78 12.5
 2 -4 -2 194.38 14
 2 -4 -2 191.88 13.4
 2 -4 -2 187.18 13.8
 -1 4 2 354.76 23.3
 -1 4 2 335.07 23
 -1 4 2 375.86 23.9
 -1 4 2 358.66 22.9
 -1 4 2 384.06 23.4
 -1 4 2 351.06 22.8
 -1 4 2 372.46 23.4
 -1 4 2 373.06 23.8
 -1 4 2 364.16 23.4
 -1 4 2 402.66 25.6
 -1 4 2 350.96 23.3
 1 -4 -2 373.86 23.6
 1 -4 -2 350.36 22.9
 1 -4 -2 334.57 23.1
 1 -4 -2 361.06 23.6
 1 -4 -2 342.97 23.4
 1 -4 -2 361.96 23.4
 1 -4 -2 371.36 25
 1 -4 -2 351.56 23
 1 -4 -2 348.77 23.3
 1 -4 -2 380.16 23.7
 1 -4 -2 364.16 23.9
 0 4 2 3408.26 206.78
 0 4 2 3494.35 204.58
 0 4 2 3710.03 204.48
 0 4 2 3533.25 204.08
 0 4 2 3349.06 204.48
 0 4 2 3287.07 205.18
 0 4 2 3471.45 204.78
 0 4 2 3354.66 204.98
 0 4 2 3465.35 204.68
 0 4 2 3720.13 204.68
 0 -4 -2 3624.44 204.58
 0 -4 -2 3227.98 204.58
 0 -4 -2 3345.77 204.58
 0 -4 -2 3297.97 205.08
 0 -4 -2 3474.85 204.18
 0 -4 -2 3355.96 204.68
 0 -4 -2 3635.64 204.58
 0 -4 -2 3328.57 204.28
 0 -4 -2 3683.03 206.68
 0 -4 -2 3560.74 205.18
 1 4 2 222.78 18.4
 1 4 2 280.07 16.7
 1 4 2 278.67 18
 1 4 2 320.77 18.2
 1 4 2 262.07 18
 1 4 2 261.67 18
 1 4 2 276.07 17.8
 1 4 2 282.67 17.2
 1 4 2 262.97 18.2
 1 4 2 263.67 20.4
 1 4 2 258.67 17.6
 -1 -4 -2 254.47 17.7
 -1 -4 -2 294.07 18
 -1 -4 -2 264.07 17.8
 -1 -4 -2 267.57 18.8
 -1 -4 -2 271.97 17.8
 -1 -4 -2 301.27 17.6
 -1 -4 -2 288.37 20.5
 -1 -4 -2 302.17 17.3
 -1 -4 -2 251.37 18.2
 2 4 2 0.2 2.2
 2 4 2 4.1 2.1
 2 4 2 2.1 3
 2 4 2 5.4 2.5
 2 4 2 6.9 1.7
 2 4 2 4.4 2
 2 4 2 6.9 1.4
 2 4 2 6 2.4
 2 4 2 6.7 2
 2 4 2 2.6 1.5
 2 4 2 4 2.1
 -2 -4 -2 5.5 1.9
 -2 -4 -2 4.7 1.6
 -2 -4 -2 4.1 2.1
 -2 -4 -2 1.3 1.9
 -2 -4 -2 6 2.1
 -2 -4 -2 3.7 3.2
 -2 -4 -2 2.5 1.8
 -2 -4 -2 5.9 1.4
 -2 -4 -2 6.8 2.9
 3 4 2 41.1 3.8
 3 4 2 29.5 7
 3 4 2 37.9 3.2
 3 4 2 41.8 5.5
 3 4 2 36 4.7
 3 4 2 58.69 6.2
 3 4 2 39.6 3.5
 3 4 2 40.3 5.8
 3 4 2 42.8 3.9
 3 4 2 41.6 3.7
 3 4 2 43.8 4.4
 3 4 2 43.7 6
 -3 -4 -2 40.4 3.5
 -3 -4 -2 45.3 4
 -3 -4 -2 38 3.7
 -3 -4 -2 35.9 5.9
 -3 -4 -2 27.1 6.5
 -3 -4 -2 44.2 4
 -3 -4 -2 46.7 3.8
 -3 -4 -2 39.9 5
 -3 -4 -2 45.4 4.4
 4 4 2 100.39 9
 4 4 2 86.59 8.9
 4 4 2 90.29 8.1
 4 4 2 103.99 8.1
 4 4 2 92.69 6.9
 4 4 2 88.29 7.8
 4 4 2 102.79 8.2
 -4 -4 -2 92.39 6.3
 -4 -4 -2 82.79 11
 -4 -4 -2 94.39 7.1
 -4 -4 -2 85.79 6.7
 -4 -4 -2 78.39 8.2
 -4 -4 -2 70.59 9
 -4 -4 -2 97.59 7
 5 4 2 117.49 10.6
 5 4 2 140.49 11.8
 5 4 2 130.99 10.8
 5 4 2 149.79 11.2
 5 4 2 133.79 10.6
 5 4 2 134.69 11.9
 5 4 2 156.28 11.4
 -5 -4 -2 138.59 10.2
 -5 -4 -2 121.09 14.3
 -5 -4 -2 131.89 8.5
 -5 -4 -2 135.19 8.8
 -5 -4 -2 135.29 9.9
 -5 -4 -2 118.89 11.3
 6 4 2 15.5 4.2
 6 4 2 12.6 4.5
 6 4 2 9.4 4.4
 6 4 2 12.2 4.2
 6 4 2 11.3 3.3
 6 4 2 19.4 4.3
 6 4 2 10.6 3.4
 6 4 2 15.1 4.1
 -6 -4 -2 11.4 4.1
 -6 -4 -2 12.3 3.7
 -6 -4 -2 8 4.8
 -6 -4 -2 9.6 3.3
 -6 -4 -2 15.1 3.4
 7 4 2 43.6 4.8
 7 4 2 54.29 7.7
 7 4 2 63.29 8.8
 7 4 2 50.89 7.7
 7 4 2 45.8 8.7
 7 4 2 63.79 7.1
 7 4 2 51.79 8.6
 7 4 2 51.79 7.6
 7 4 2 69.29 7.2
 -7 -4 -2 56.49 7.4
 -7 -4 -2 58.79 8.4
 -7 -4 -2 32.3 9
 -7 -4 -2 53.69 6.7
 -7 -4 -2 61.99 7.1
 8 4 2 280.17 22.6
 8 4 2 301.07 21.9
 8 4 2 285.27 23
 8 4 2 297.47 22.1
 8 4 2 296.57 21.7
 8 4 2 310.07 19.2
 8 4 2 302.67 22
 8 4 2 291.97 19.9
 8 4 2 289.87 21.6
 -8 -4 -2 231.68 20
 -8 -4 -2 291.07 21.8
 -8 -4 -2 234.98 25.4
 -8 -4 -2 325.07 20.7
 -8 -4 -2 302.47 21.4
 -8 -4 -2 279.67 20.1
 9 4 2 37.3 7.4
 9 4 2 40.1 8.1
 9 4 2 36.5 8.1
 9 4 2 29.6 6.8
 9 4 2 33.4 7.8
 9 4 2 46.5 5.8
 9 4 2 37.4 5.7
 9 4 2 46.2 8.3
 9 4 2 50.19 9.6
 -9 -4 -2 32.4 6.2
 -9 -4 -2 38.7 10.8
 -9 -4 -2 44 8
 -9 -4 -2 33.3 5.8
 -9 -4 -2 34.2 6.6
 -9 -4 -2 41.6 7.5
 -9 -4 -2 41.5 6.9
 10 4 2 377.46 24.8
 10 4 2 364.96 28.9
 10 4 2 383.76 28.2
 10 4 2 392.36 29
 10 4 2 391.96 28
 10 4 2 379.86 24.9
 10 4 2 389.26 30
 10 4 2 351.76 27.7
 10 4 2 357.06 28.1
 -10 -4 -2 347.77 27.3
 -10 -4 -2 346.77 27.8
 -10 -4 -2 384.16 26.6
 -10 -4 -2 379.76 22.8
 -10 -4 -2 304.57 32.4
 -10 -4 -2 362.06 26.6
 -10 -4 -2 381.66 25.5
 -10 -4 -2 384.16 23
 -10 -4 -2 362.36 26.3
 11 4 2 25.6 8
 11 4 2 17.7 7.7
 11 4 2 17.9 6.8
 11 4 2 37.5 9.3
 11 4 2 29.6 7.7
 11 4 2 14.6 6.8
 11 4 2 31.5 8.3
 -11 -4 -2 24.8 6
 -11 -4 -2 32.4 3.8
 -11 -4 -2 39.9 7.3
 -11 -4 -2 30.1 5.8
 -11 -4 -2 24.6 9.6
 -11 -4 -2 30.2 3.9
 -11 -4 -2 26.1 7.2
 -11 -4 -2 30.4 6.8
 -11 -4 -2 25 6.9
 12 4 2 -4.2 3
 12 4 2 -3.6 4.3
 12 4 2 3.2 4.8
 12 4 2 3 5.8
 12 4 2 2.9 5.3
 12 4 2 1.6 5.5
 -12 -4 -2 0 1.9
 -12 -4 -2 1.9 4.8
 -12 -4 -2 -0.8 2.1
 -12 -4 -2 -0.6 4
 -12 -4 -2 2.9 4.4
 -12 -4 -2 5 4.1
 -12 -4 -2 6.3 4.4
 -12 -4 -2 1.3 3.6
 -12 -4 -2 1.7 5.5
 13 4 2 174.58 22
 13 4 2 141.49 20
 13 4 2 196.08 23.6
 13 4 2 172.38 17.6
 13 4 2 150.18 19.1
 13 4 2 160.58 20.6
 -13 -4 -2 142.49 17
 -13 -4 -2 165.18 17
 -13 -4 -2 144.19 11
 -13 -4 -2 152.68 11.5
 14 4 2 -4.9 6.1
 14 4 2 -3 5
 14 4 2 -9.2 6.2
 14 4 2 -4.3 5.4
 14 4 2 3 6.6
 -14 -4 -2 8.6 6
 -14 -4 -2 4.6 2.3
 -14 -4 -2 -0.7 4.3
 -12 5 3 83.09 14.8
 -12 5 3 61.09 11.9
 -12 5 3 53.19 9.7
 -12 5 3 90.09 12.1
 12 -5 -3 73.99 15.6
 12 -5 -3 28.8 12.9
 12 -5 -3 65.19 15.3
 12 -5 -3 85.49 14.2
 -11 5 3 5.8 4.9
 -11 5 3 18.4 7.8
 -11 5 3 14.7 5.6
 -11 5 3 -0.1 5.2
 11 -5 -3 6.4 8.7
 11 -5 -3 9.4 6.8
 11 -5 -3 -3.7 7.8
 11 -5 -3 11 7.5
 -10 5 3 2.9 4.7
 -10 5 3 -0.5 3.2
 -10 5 3 -4.1 2.8
 -10 5 3 3 4.6
 -10 5 3 6.8 4.4
 10 -5 -3 -3.9 4.8
 10 -5 -3 -7.3 6.6
 10 -5 -3 0.9 6.2
 10 -5 -3 -4.1 6.7
 -9 5 3 86.49 12.4
 -9 5 3 109.39 17.3
 -9 5 3 111.79 10.9
 -9 5 3 85.39 11.3
 -9 5 3 115.39 15.1
 -9 5 3 107.19 12.6
 9 -5 -3 92.39 15.9
 9 -5 -3 103.59 15.5
 9 -5 -3 91.99 13.7
 9 -5 -3 74.79 16.1
 -8 5 3 123.29 15.5
 -8 5 3 112.29 11.5
 -8 5 3 115.19 14.8
 -8 5 3 109.09 13
 -8 5 3 100.29 13.1
 -8 5 3 129.19 11.4
 -8 5 3 121.79 15.8
 8 -5 -3 124.89 17.1
 8 -5 -3 97.29 14.6
 8 -5 -3 108.69 12.7
 8 -5 -3 72.39 14.9
 8 -5 -3 133.89 15.4
 -7 5 3 1.4 4.2
 -7 5 3 17.7 5.6
 -7 5 3 11.7 4.5
 -7 5 3 17.4 5
 -7 5 3 13.3 4.9
 -7 5 3 19.4 7.6
 7 -5 -3 15.7 8
 7 -5 -3 8.6 4.4
 7 -5 -3 20 6.2
 7 -5 -3 5.8 6.7
 7 -5 -3 19.1 6.7
 7 -5 -3 11.7 4.9
 7 -5 -3 14.9 2.6
 -6 5 3 330.27 24.2
 -6 5 3 354.06 26.2
 -6 5 3 354.46 23.7
 -6 5 3 362.76 25.1
 -6 5 3 349.37 24.6
 -6 5 3 395.76 28.4
 6 -5 -3 340.87 28.4
 6 -5 -3 318.67 21.8
 6 -5 -3 305.27 26.3
 6 -5 -3 347.07 24.3
 6 -5 -3 330.27 24.6
 6 -5 -3 348.17 25.7
 6 -5 -3 338.47 25.6
 -5 5 3 181.28 14.4
 -5 5 3 200.48 17.3
 -5 5 3 187.38 15.5
 -5 5 3 167.48 14.7
 -5 5 3 174.38 14.1
 -5 5 3 201.08 13.9
 -5 5 3 182.08 14.1
 5 -5 -3 148.99 15.4
 5 -5 -3 170.38 13.9
 5 -5 -3 159.48 17
 5 -5 -3 184.98 15
 5 -5 -3 173.18 15
 5 -5 -3 140.09 14.3
 5 -5 -3 167.58 12.1
 5 -5 -3 173.48 14.7
 -4 5 3 9.5 3.8
 -4 5 3 10.2 5
 -4 5 3 14.4 4.4
 -4 5 3 8 2.7
 -4 5 3 -2 2.7
 -4 5 3 5.9 3.3
 -4 5 3 5.9 2.9
 -4 5 3 7.3 3.4
 -4 5 3 12.2 3.8
 4 -5 -3 4.5 3.3
 4 -5 -3 3.2 3.6
 4 -5 -3 1.9 2.6
 4 -5 -3 8 5.4
 4 -5 -3 12.7 3
 4 -5 -3 9.5 4
 4 -5 -3 15.6 4.7
 4 -5 -3 10.4 4.1
 -3 5 3 58.59 7.8
 -3 5 3 62.59 7.5
 -3 5 3 61.89 7.2
 -3 5 3 47.8 6.9
 -3 5 3 55.29 6.6
 -3 5 3 55.99 5.5
 -3 5 3 71.19 9.2
 -3 5 3 66.69 7.8
 -3 5 3 65.89 7.8
 -3 5 3 65.59 6.8
 3 -5 -3 56.09 5.8
 3 -5 -3 55.49 8.1
 3 -5 -3 54.89 7.3
 3 -5 -3 41.6 6.9
 3 -5 -3 54.19 7
 3 -5 -3 44.4 7.3
 3 -5 -3 39.7 4.6
 3 -5 -3 45.8 6.1
 3 -5 -3 52.39 7.1
 3 -5 -3 57.39 7
 3 -5 -3 43.8 6.5
 -2 5 3 237.98 16.3
 -2 5 3 248.48 17.3
 -2 5 3 259.67 17.2
 -2 5 3 234.98 16.8
 -2 5 3 269.67 19.6
 -2 5 3 241.28 16.9
 -2 5 3 229.98 16.8
 -2 5 3 244.28 16.3
 -2 5 3 230.28 16.7
 -2 5 3 223.78 17.3
 -2 5 3 226.78 16.1
 2 -5 -3 212.68 17.1
 2 -5 -3 224.28 16.9
 2 -5 -3 247.78 18.2
 2 -5 -3 215.58 16.4
 2 -5 -3 261.07 18
 2 -5 -3 228.68 17
 2 -5 -3 227.48 16.4
 2 -5 -3 245.08 17.2
 2 -5 -3 223.88 18.4
 2 -5 -3 234.28 16.9
 -1 5 3 100.29 7.4
 -1 5 3 91.79 8.1
 -1 5 3 90.49 8
 -1 5 3 97.29 10.5
 -1 5 3 83.69 8.3
 -1 5 3 95.39 8
 -1 5 3 88.69 7.5
 -1 5 3 86.49 7.9
 -1 5 3 83.79 8.4
 -1 5 3 86.89 7.9
 -1 5 3 83.29 7.8
 1 -5 -3 87.69 8.3
 1 -5 -3 95.99 8
 1 -5 -3 84.59 8.2
 1 -5 -3 84.49 7.4
 1 -5 -3 84.99 7.6
 1 -5 -3 84.79 8.1
 1 -5 -3 82.99 7.8
 1 -5 -3 84.19 8.1
 1 -5 -3 88.49 8.8
 1 -5 -3 86.29 9.6
 1 -5 -3 96.59 8.7
 0 5 3 246.78 17.3
 0 5 3 271.97 17.1
[truncated: 1,552,460 more chars]
